# Supplementary material for: RNA sequencing-based exploration of the effects of blue laser irradiation on mRNAs involved in functional metabolites of D. officinales
Source: PeerJ journal article supplement (doi:10.7717/peerj.12684), 2022-01-04
Supplement: Supplemental_information.zip [file Supplemental_information.zip]

**Table S4** The FPKM value of differentially expressed genes of *D. officinale* under different light treatments

| Gene ID                           | White1     | White2     | White3     | Blue1      | Blue2     | Blue3      | Laser1     | Laser2     | Laser3     |
|-----------------------------------|------------|------------|------------|------------|-----------|------------|------------|------------|------------|
| gene-MA16_Dca009641               | 1.658292   | 2.566069   | 2.702823   | 1.752238   | 1.445384  | 1.226888   | 5.332218   | 5.220523   | 5.85391    |
| gene-MA16_Dca009643               | 6.366107   | 6.095078   | 4.896574   | 2.808374   | 2.070931  | 2.876619   | 6.632579   | 5.659909   | 6.734943   |
| gene-MA16_Dca009646               | 1192.67896 | 1175.1842  | 1197.53308 | 41.888077  | 37.71384  | 35.746586  | 44.681957  | 37.02438   | 41.693089  |
| gene-MA16_Dca009647               | 4.963569   | 4.905734   | 4.941891   | 2.667691   | 2.560257  | 2.861358   | 2.549768   | 1.788654   | 1.744635   |
| gene-MA16_Dca026251               | 22.256199  | 18.588081  | 19.173079  | 61.30666   | 62.86042  | 57.360909  | 55.932018  | 55.511448  | 58.295048  |
| gene-MA16_Dca008992               | 60.222038  | 61.691887  | 59.904976  | 12.622072  | 12.688202 | 13.339287  | 12.226173  | 9.616714   | 10.482379  |
| gene-MA16_Dca008991               | 497.713562 | 528.463196 | 493.852386 | 108.213448 | 97.901497 | 103.495918 | 23.25696   | 22.384073  | 23.784172  |
| gene-MA16_Dca008990               | 37.52261   | 38.171249  | 34.762077  | 2.752981   | 2.408365  | 2.360204   | 0.382433   | 0.554732   | 0.313289   |
| gene-MA16_Dca012410               | 15.864329  | 14.827536  | 14.372485  | 2.999695   | 4.33265   | 2.687616   | 4.936836   | 3.939702   | 4.140668   |
| gene-MA16_Dca012413               | 9.209277   | 8.855454   | 6.573822   | 10.17786   | 8.111316  | 8.717493   | 18.704493  | 17.593657  | 19.694538  |
| gene-MA16_Dca020896               | 8.640729   | 7.50895    | 6.145148   | 26.787239  | 27.186148 | 19.278399  | 16.938633  | 20.633738  | 23.764071  |
| gene-MA16_Dca025251               | 4.549541   | 3.28391    | 4.161408   | 0.51892    | 1.320536  | 1.31812    | 0.881471   | 0.775492   | 0.625336   |
| gene-MA16_Dca025250               | 1.902134   | 1.629873   | 1.852466   | 3.174389   | 3.432197  | 3.12281    | 4.739033   | 4.256949   | 3.978157   |
| gene-MA16_Dca020892               | 63.914749  | 57.092831  | 58.646255  | 34.235695  | 42.085255 | 38.192474  | 21.81605   | 26.079573  | 19.23315   |
| gene-MA16_Dca021574               | 9.473094   | 8.91333    | 7.831327   | 8.58313    | 7.174891  | 8.828023   | 19.620003  | 20.934626  | 19.859753  |
| gene-MA16_Dca015280               | 12.365815  | 10.728758  | 10.784815  | 0.020459   | 0.159006  | 0.021498   | 0.037865   | 0          | 0          |
| gene-MA16_Dca019509               | 8.21371    | 7.930823   | 11.75119   | 1.549938   | 1.966963  | 1.309485   | 3.773072   | 0.982754   | 1.766729   |
| gene-MA16_Dca010107               | 76.833946  | 78.072601  | 70.493317  | 51.521133  | 56.835587 | 55.342686  | 198.595856 | 201.059967 | 201.005051 |
| gene-MA16_Dca010106               | 11.75796   | 8.923689   | 11.102122  | 3.941591   | 4.810604  | 4.301401   | 5.846513   | 4.929545   | 4.975471   |
| gene-MA16_Dca010103               | 0.72742    | 0.722737   | 0.491137   | 0.904319   | 0.695959  | 0.640905   | 1.35637    | 1.546221   | 1.59735    |
| gene-MA16_Dca010108               | 8.846334   | 7.391052   | 9.133506   | 18.335281  | 16.177519 | 16.566782  | 25.595552  | 22.004299  | 24.317308  |
| gene-MA16_Dca022945               | 4.811902   | 6.345496   | 5.406061   | 6.299818   | 8.558266  | 7.164092   | 12.244042  | 12.578744  | 11.32727   |
| gene-MA16_Dca017346               | 4.203266   | 2.892491   | 3.447994   | 6.717684   | 6.717107  | 8.717289   | 8.353167   | 10.062441  | 6.024189   |
| gene-MA16_Dca005958               | 7.855642   | 7.431098   | 7.542043   | 1.441869   | 2.007339  | 2.25775    | 2.385247   | 1.881701   | 1.892134   |
| Dendrobium_catenatum_newGene_1799 | 0.212817   | 0.229681   | 0.330536   | 0.936623   | 1.232625  | 1.128895   | 1.308633   | 1.235515   | 1.694221   |
| gene-MA16_Dca007625               | 17.981915  | 17.946711  | 19.006697  | 4.636596   | 4.910979  | 5.079114   | 8.460003   | 8.58659    | 10.492419  |

|                                    |            |            |            |            |            |            |            |            |            |
|------------------------------------|------------|------------|------------|------------|------------|------------|------------|------------|------------|
| gene-MA16_Dca009844                | 1.116616   | 1.115207   | 1.404874   | 4.630752   | 2.682794   | 3.599787   | 4.647179   | 3.479199   | 3.874746   |
| gene-MA16_Dca009843                | 47.924683  | 44.290237  | 44.416336  | 22.372267  | 21.321177  | 20.639605  | 25.349398  | 24.447081  | 20.333166  |
| gene-MA16_Dca001668                | 2.296948   | 1.75806    | 1.551104   | 3.601727   | 3.45463    | 3.919559   | 3.931347   | 4.774144   | 3.415979   |
| gene-MA16_Dca005174                | 0.503559   | 0.419495   | 0.397798   | 0.674927   | 0.400579   | 0.445956   | 0.874814   | 1.172837   | 1.01381    |
| gene-MA16_Dca000045                | 0.472249   | 0.281202   | 0          | 3.034295   | 3.693813   | 2.368793   | 1.572414   | 1.755504   | 1.456589   |
| Dendrobium_catenatum_newGene_10915 | 14.6744    | 14.279026  | 15.05829   | 7.848177   | 8.312548   | 6.875352   | 6.649791   | 7.941234   | 8.150553   |
| gene-MA16_Dca008711                | 23.482878  | 26.876564  | 23.389757  | 7.079996   | 7.363502   | 7.11382    | 5.548484   | 5.265635   | 6.37227    |
| gene-MA16_Dca008712                | 29.902515  | 32.998302  | 28.185596  | 8.421226   | 4.465575   | 8.141365   | 7.87335    | 7.817937   | 6.635999   |
| gene-MA16_Dca012279                | 7.196107   | 6.787878   | 7.701901   | 1.483114   | 1.162957   | 1.300712   | 0.452353   | 0.501694   | 0.616508   |
| gene-MA16_Dca010699                | 10.099895  | 6.770992   | 9.380078   | 4.52771    | 5.199044   | 3.353396   | 6.165405   | 4.02638    | 4.535913   |
| gene-MA16_Dca010690                | 5.388248   | 6.87534    | 5.865035   | 0.362105   | 0.813982   | 0.38628    | 0.306169   | 0.521354   | 0.194422   |
| Dendrobium_catenatum_newGene_12798 | 3.33668    | 4.272061   | 4.331232   | 1.789617   | 1.674436   | 1.0416     | 0.876567   | 1.261503   | 1.342436   |
| gene-MA16_Dca016694                | 18.58098   | 19.816908  | 17.806908  | 2.682855   | 2.416314   | 2.022469   | 2.033325   | 1.335331   | 0.575994   |
| gene-MA16_Dca016691                | 0.90077    | 1.190654   | 0.909006   | 1.610578   | 2.909891   | 2.682132   | 1.346735   | 1.409899   | 2.074418   |
| gene-MA16_Dca016698                | 20.098072  | 21.858664  | 20.235874  | 15.145338  | 12.755418  | 15.572883  | 8.127331   | 9.51425    | 8.473893   |
| gene-MA16_Dca011568                | 2.356342   | 2.265993   | 2.46006    | 3.984618   | 3.014128   | 3.592095   | 5.886805   | 5.829269   | 6.401222   |
| gene-MA16_Dca020931                | 35.188362  | 34.902096  | 35.067371  | 18.71072   | 15.984541  | 16.06753   | 15.149943  | 13.547636  | 14.912179  |
| gene-MA16_Dca011563                | 11.841834  | 9.563985   | 14.348316  | 3.165042   | 4.879581   | 4.779254   | 11.525544  | 7.807665   | 6.508638   |
| gene-MA16_Dca003538                | 13.255772  | 11.380824  | 12.43918   | 9.17534    | 5.787411   | 10.120182  | 3.398877   | 1.845998   | 5.539255   |
| gene-MA16_Dca013586                | 23.505934  | 20.531414  | 21.595472  | 11.367783  | 14.619647  | 11.747747  | 9.47603    | 10.056181  | 11.250118  |
| gene-MA16_Dca013582                | 24.174173  | 26.176321  | 27.551937  | 12.37529   | 12.67522   | 12.75561   | 19.876463  | 16.870197  | 18.165159  |
| gene-MA16_Dca013637                | 13.551759  | 12.829635  | 13.043636  | 2.877093   | 2.824287   | 2.470899   | 1.331708   | 2.073071   | 2.114176   |
| gene-MA16_Dca013631                | 4.275321   | 4.451621   | 4.715714   | 2.597911   | 3.162522   | 3.332059   | 2.58091    | 1.755337   | 1.588008   |
| gene-MA16_Dca016036                | 116.443375 | 113.545486 | 115.074028 | 34.741646  | 31.06077   | 32.9715    | 31.181175  | 30.503811  | 28.532726  |
| gene-MA16_Dca002370                | 26.38818   | 26.378073  | 29.822147  | 10.005492  | 10.54143   | 9.422817   | 16.72361   | 16.768669  | 18.459084  |
| gene-MA16_Dca023560                | 2018.01563 | 2027.90967 | 2116.92358 | 842.958252 | 887.531677 | 874.049683 | 729.001404 | 736.898987 | 726.691895 |
| gene-MA16_Dca023565                | 15.65853   | 17.65633   | 16.563852  | 30.172413  | 25.804211  | 26.19216   | 45.041401  | 47.453953  | 42.711617  |
| Dendrobium_catenatum_newGene_2328  | 2.758285   | 2.06148    | 1.899723   | 2.194286   | 3.979694   | 3.017301   | 16.250065  | 16.562233  | 12.55974   |

|                                    |            |            |            |            |            |            |            |            |            |
|------------------------------------|------------|------------|------------|------------|------------|------------|------------|------------|------------|
| gene-MA16_Dca015672                | 19.257647  | 20.941694  | 20.246506  | 1.785787   | 1.848893   | 2.408086   | 3.800844   | 3.301211   | 3.090129   |
| gene-MA16_Dca015673                | 12.750539  | 11.365664  | 12.395491  | 5.598394   | 5.474911   | 4.891869   | 7.761062   | 5.009017   | 6.36345    |
| Dendrobium_catenatum_newGene_663   | 0.229132   | 0.23881    | 0.190183   | 0.591212   | 0.421338   | 0.932317   | 0.409485   | 0.535065   | 0.591715   |
| gene-MA16_Dca015090                | 5.192533   | 5.051192   | 5.321474   | 2.257453   | 2.386121   | 2.198416   | 1.961554   | 2.459822   | 1.620336   |
| gene-MA16_Dca015091                | 42.45253   | 45.749458  | 42.05687   | 10.488151  | 10.064028  | 12.418077  | 22.978983  | 22.525957  | 23.365225  |
| gene-MA16_Dca006117                | 146.874664 | 137.037811 | 154.073227 | 304.821472 | 307.663177 | 310.133667 | 537.113525 | 485.152039 | 479.382599 |
| gene-MA16_Dca006653                | 13.947125  | 14.417376  | 13.117318  | 14.033447  | 17.682348  | 18.916916  | 9.112082   | 6.861753   | 6.433334   |
| gene-MA16_Dca001462                | 0.30534    | 0.323203   | 0.319962   | 0.451463   | 0.326843   | 0.547465   | 1.007641   | 0.849136   | 0.864755   |
| gene-MA16_Dca002171                | 0.728026   | 0.949857   | 1.187714   | 0.271781   | 0.257977   | 0.271468   | 0.581886   | 0.382459   | 0.302673   |
| gene-MA16_Dca012847                | 10.677165  | 11.906968  | 11.846411  | 17.501682  | 16.930986  | 16.044388  | 73.504875  | 81.983231  | 79.531662  |
| gene-MA16_Dca002826                | 2.240414   | 2.586104   | 4.050134   | 7.091232   | 8.724222   | 5.895685   | 1.695149   | 4.088308   | 2.280719   |
| gene-MA16_Dca002823                | 8.5839     | 7.949702   | 7.413487   | 3.605383   | 3.503112   | 1.373568   | 2.129306   | 1.171219   | 1.746047   |
| gene-MA16_Dca002828                | 27.863688  | 25.450317  | 28.758072  | 9.693532   | 9.860595   | 11.713637  | 9.926217   | 12.578808  | 10.787671  |
| gene-MA16_Dca012607                | 2.769793   | 3.189788   | 2.189731   | 2.861794   | 3.137383   | 2.379113   | 0.394954   | 0.694716   | 0.692885   |
| Dendrobium_catenatum_newGene_14515 | 3.129221   | 4.463377   | 3.011333   | 1.033371   | 1.352805   | 1.034748   | 0.613712   | 0.91065    | 0.276247   |
| gene-MA16_Dca003709                | 110.204895 | 109.904518 | 106.426895 | 56.635174  | 61.63792   | 51.97797   | 36.551422  | 38.490597  | 34.341663  |
| gene-MA16_Dca027052                | 226.772934 | 252.044495 | 242.417023 | 70.919479  | 73.639313  | 75.328148  | 65.489738  | 55.042225  | 57.353199  |
| gene-MA16_Dca003703                | 4.402529   | 4.254477   | 4.212016   | 2.015804   | 1.137972   | 1.815851   | 3.924277   | 1.056631   | 0.834749   |
| gene-MA16_Dca014460                | 0.345566   | 0.052117   | 0.194225   | 0.217573   | 0.827404   | 0.488023   | 2.476834   | 2.172096   | 1.99018    |
| gene-MA16_Dca014467                | 0.772448   | 0.790118   | 0.497206   | 1.642915   | 1.721684   | 1.524964   | 3.671255   | 2.835669   | 3.737098   |
| gene-MA16_Dca014464                | 3.818422   | 3.150934   | 3.577317   | 0.413095   | 0.045521   | 0.247503   | 2.230505   | 1.374722   | 1.642387   |
| gene-MA16_Dca026096                | 1.915039   | 1.682746   | 2.081591   | 1.656702   | 1.579142   | 1.317073   | 0.202032   | 0.795559   | 0.453164   |
| gene-MA16_Dca027942                | 17.260365  | 18.524574  | 18.785671  | 7.35706    | 5.958388   | 7.157195   | 6.142989   | 5.249653   | 5.313179   |
| gene-MA16_Dca025545                | 2387.65796 | 2431.0647  | 2388.3877  | 221.677521 | 217.91098  | 217.671677 | 130.556564 | 122.724495 | 120.06498  |
| gene-MA16_Dca019218                | 49.720673  | 48.687817  | 48.359608  | 18.028357  | 15.880489  | 17.945124  | 16.012732  | 14.884919  | 15.657144  |
| gene-MA16_Dca024635                | 38.33532   | 38.808247  | 30.83429   | 5.466505   | 3.234308   | 4.199501   | 0.479427   | 0.66818    | 1.315879   |
| Dendrobium_catenatum_newGene_481   | 3.021147   | 4.648329   | 3.131685   | 0.636001   | 0.403221   | 0.500174   | 0.760081   | 0.810815   | 0.595268   |
| Dendrobium_catenatum_newGene_8579  | 2.053676   | 3.868573   | 2.651651   | 12.877064  | 11.427227  | 10.968602  | 5.630397   | 4.21304    | 3.874892   |

|                                    |           |           |           |           |           |           |           |           |           |
|------------------------------------|-----------|-----------|-----------|-----------|-----------|-----------|-----------|-----------|-----------|
| gene-MA16_Dca021044                | 12.363139 | 11.226523 | 11.515233 | 1.316637  | 1.270529  | 1.171375  | 2.670722  | 1.942601  | 2.703953  |
| gene-MA16_Dca020021                | 72.257988 | 76.360825 | 74.324654 | 36.380501 | 36.59206  | 36.093815 | 28.808344 | 26.905968 | 27.841579 |
| gene-MA16_Dca020020                | 6.080023  | 6.979284  | 7.917366  | 2.914343  | 2.572452  | 3.866099  | 2.460761  | 2.206023  | 1.661805  |
| gene-MA16_Dca007470                | 4.238676  | 4.966752  | 3.183223  | 7.813809  | 7.432941  | 8.568675  | 24.649862 | 20.951815 | 22.606653 |
| gene-MA16_Dca007475                | 0.616389  | 0.738758  | 0.819514  | 1.15546   | 1.742121  | 1.806801  | 3.461602  | 3.998134  | 4.762926  |
| gene-MA16_Dca006705                | 87.146843 | 69.508415 | 79.094215 | 27.11031  | 54.080063 | 19.060892 | 20.171965 | 34.395348 | 35.323418 |
| gene-MA16_Dca004412                | 1.883419  | 1.585358  | 2.117036  | 0.87776   | 1.152509  | 0.966522  | 0.221143  | 0.74139   | 0.320385  |
| gene-MA16_Dca008560                | 16.378105 | 17.570236 | 16.627827 | 19.576805 | 20.484348 | 21.190123 | 42.376381 | 41.043705 | 43.570705 |
| gene-MA16_Dca003142                | 1.150718  | 0.529362  | 0.833833  | 1.907776  | 1.701106  | 1.65668   | 3.458775  | 3.849427  | 2.667902  |
| gene-MA16_Dca010955                | 28.901834 | 27.54076  | 29.119688 | 17.843035 | 17.799997 | 11.877248 | 12.943532 | 10.079637 | 12.523608 |
| gene-MA16_Dca008919                | 5.047843  | 4.468331  | 4.789759  | 8.295363  | 7.456138  | 9.128947  | 10.658237 | 12.404647 | 11.005762 |
| gene-MA16_Dca013981                | 24.574278 | 22.676517 | 22.872581 | 57.087589 | 55.462582 | 56.988861 | 54.558327 | 54.650627 | 54.943886 |
| gene-MA16_Dca013984                | 4.238015  | 5.023045  | 5.37918   | 1.46168   | 3.601055  | 0.912546  | 3.157988  | 4.668092  | 4.083761  |
| gene-MA16_Dca020627                | 5.736387  | 5.310966  | 6.657529  | 0.329396  | 0.037074  | 0.392512  | 0.058978  | 0.031412  | 0.109499  |
| gene-MA16_Dca020624                | 0.706504  | 0.961644  | 0.794811  | 1.430405  | 0.98539   | 0.21489   | 0.250836  | 0.400771  | 0.268117  |
| gene-MA16_Dca011271                | 23.765953 | 25.341496 | 25.325998 | 13.560681 | 10.371207 | 12.355282 | 10.047375 | 10.965225 | 9.965454  |
| gene-MA16_Dca016729                | 24.003485 | 18.406065 | 22.286373 | 4.61261   | 5.035272  | 5.965602  | 2.044032  | 1.77122   | 2.496094  |
| gene-MA16_Dca012614                | 35.509739 | 37.110489 | 33.889282 | 4.104381  | 4.27173   | 5.000117  | 0.857959  | 1.39588   | 1.233901  |
| Dendrobium_catenatum_newGene_11547 | 0.759484  | 0.791741  | 0.876463  | 0.340699  | 0.3109    | 0.431876  | 0.541573  | 0.575472  | 0.59297   |
| gene-MA16_Dca014617                | 2.587677  | 2.19898   | 2.994057  | 2.002421  | 1.609629  | 1.0506    | 0.991143  | 0.891012  | 0.915108  |
| gene-MA16_Dca014616                | 7.171559  | 6.462214  | 7.562139  | 11.093671 | 6.654712  | 6.911003  | 21.465826 | 21.1222   | 17.29356  |
| gene-MA16_Dca014618                | 32.851116 | 29.713919 | 27.881804 | 9.811207  | 11.469394 | 10.428107 | 20.440294 | 19.218363 | 17.335413 |
| Dendrobium_catenatum_newGene_178   | 0.363339  | 0.808848  | 0.847871  | 1.261161  | 0.842504  | 0.700758  | 3.023908  | 3.070716  | 2.306357  |
| Dendrobium_catenatum_newGene_1719  | 11.700722 | 13.159568 | 16.970078 | 16.061218 | 15.159207 | 13.255983 | 35.345932 | 33.994884 | 31.925236 |
| Dendrobium_catenatum_newGene_9528  | 8.848422  | 10.29142  | 11.691975 | 1.072114  | 2.678124  | 0.547772  | 1.494981  | 5.192012  | 3.626515  |
| gene-MA16_Dca019022                | 0.342072  | 0.352483  | 0.175524  | 0.274268  | 0.340041  | 0.45495   | 1.049972  | 0.974205  | 0.776951  |
| Dendrobium_catenatum_newGene_8438  | 0.732814  | 0.364827  | 1.041679  | 0.578561  | 1.693355  | 1.014596  | 1.881335  | 2.665396  | 1.442078  |
| Dendrobium_catenatum_newGene_8434  | 4.93785   | 4.858305  | 3.642577  | 7.250889  | 6.752233  | 7.833336  | 10.858386 | 12.651432 | 9.090528  |

|                                    |            |            |            |            |            |            |            |            |            |
|------------------------------------|------------|------------|------------|------------|------------|------------|------------|------------|------------|
| Dendrobium_catenatum_newGene_8977  | 1.689919   | 2.043409   | 2.418211   | 0.499538   | 0.641973   | 0.736345   | 0.437281   | 0.61909    | 0.797794   |
| gene-MA16_Dca013825                | 19.542542  | 16.38175   | 15.66994   | 7.386106   | 9.062351   | 9.445529   | 9.452417   | 8.504608   | 8.020698   |
| gene-MA16_Dca013820                | 22.826519  | 23.869162  | 23.978956  | 31.879038  | 30.498665  | 30.445707  | 117.103165 | 117.868805 | 103.645088 |
| gene-MA16_Dca005245                | 9.002891   | 7.76614    | 7.133031   | 9.643361   | 8.518081   | 11.580675  | 15.51303   | 17.765863  | 19.34705   |
| gene-MA16_Dca008245                | 21.730453  | 20.942291  | 20.967651  | 8.378895   | 8.534606   | 10.887348  | 39.591808  | 34.963795  | 39.301651  |
| gene-MA16_Dca002661                | 1.467618   | 2.817765   | 2.234192   | 4.845007   | 3.664736   | 3.656358   | 4.903422   | 6.608046   | 6.940672   |
| gene-MA16_Dca015741                | 7.113328   | 6.992909   | 6.737965   | 0.863933   | 0.611819   | 0.606503   | 1.205759   | 1.057763   | 1.437422   |
| gene-MA16_Dca010850                | 2.614703   | 4.127182   | 2.826582   | 1.682801   | 2.081191   | 1.615915   | 4.61981    | 4.607056   | 6.156195   |
| Dendrobium_catenatum_newGene_16659 | 32.60548   | 32.056656  | 30.819283  | 45.458096  | 43.605286  | 44.369789  | 72.844742  | 78.011597  | 80.177628  |
| gene-MA16_Dca012753                | 13.731807  | 13.692368  | 12.268743  | 7.004754   | 5.671819   | 7.504566   | 12.124527  | 9.870992   | 9.417773   |
| gene-MA16_Dca026354                | 13.326223  | 16.013737  | 10.956358  | 50.441807  | 43.914192  | 47.28397   | 47.900238  | 47.72015   | 48.820759  |
| gene-MA16_Dca023653                | 22.223053  | 24.140352  | 23.059937  | 14.282666  | 13.488003  | 15.11871   | 11.104266  | 8.733317   | 8.884228   |
| gene-MA16_Dca023644                | 16.764593  | 15.605596  | 15.797394  | 37.82045   | 43.64827   | 38.856693  | 61.21505   | 45.500717  | 53.670139  |
| gene-MA16_Dca022290                | 146.367355 | 147.876266 | 145.8423   | 82.389359  | 90.700188  | 89.994865  | 43.945774  | 34.928314  | 45.113724  |
| gene-MA16_Dca022293                | 221.607513 | 228.916382 | 225.284546 | 111.171593 | 111.779198 | 111.754044 | 99.139252  | 95.882263  | 94.356209  |
| gene-MA16_Dca022295                | 1206.55237 | 1175.61719 | 1199.77844 | 322.226562 | 334.65033  | 324.805725 | 246.411835 | 229.565186 | 226.095261 |
| gene-MA16_Dca024868                | 8.730331   | 6.81085    | 7.149791   | 3.542828   | 3.719135   | 4.498582   | 5.535723   | 5.324213   | 6.294759   |
| Dendrobium_catenatum_newGene_2902  | 7.429216   | 8.899996   | 8.289098   | 3.117679   | 2.782185   | 2.195321   | 2.591785   | 2.785398   | 3.45918    |
| gene-MA16_Dca014361                | 7.479127   | 10.410995  | 7.865105   | 12.073659  | 10.608933  | 12.358958  | 21.284945  | 19.377468  | 18.409397  |
| gene-MA16_Dca019625                | 256.782227 | 256.195618 | 268.428619 | 1.907475   | 2.534703   | 2.691611   | 11.389315  | 7.038892   | 8.298379   |
| Dendrobium_catenatum_newGene_11041 | 8.779991   | 9.044375   | 8.372605   | 6.556789   | 6.860123   | 6.66619    | 2.710454   | 1.850482   | 2.492778   |
| gene-MA16_Dca024241                | 37.123688  | 39.760685  | 39.554115  | 18.329325  | 19.128918  | 18.031672  | 18.409786  | 17.027588  | 17.977123  |
| gene-MA16_Dca027741                | 0.811224   | 0.661792   | 0.686084   | 0.777641   | 1.273482   | 1.202694   | 1.595664   | 1.560405   | 1.67393    |
| gene-MA16_Dca000214                | 4.560983   | 6.004847   | 6.479138   | 35.448017  | 32.328579  | 34.153702  | 57.971355  | 54.697426  | 59.296318  |
| gene-MA16_Dca000211                | 3.000499   | 1.944998   | 4.20592    | 10.939588  | 6.810061   | 9.343085   | 15.468883  | 15.90309   | 20.087645  |
| gene-MA16_Dca000213                | 447.439331 | 463.30426  | 450.635223 | 159.382812 | 157.839325 | 152.899994 | 163.674194 | 165.082413 | 162.141251 |
| gene-MA16_Dca018236                | 7.495198   | 7.490864   | 6.777834   | 8.809406   | 8.629836   | 9.900806   | 16.848145  | 14.235588  | 14.913707  |
| gene-MA16_Dca018232                | 3542.8689  | 3605.55566 | 3406.12427 | 1774.57776 | 1713.88403 | 1714.0647  | 1390.90784 | 1409.23267 | 1404.93543 |

|                                    |            |            |            |            |            |            |            |            |            |
|------------------------------------|------------|------------|------------|------------|------------|------------|------------|------------|------------|
| gene-MA16_Dca025873                | 0.77387    | 0.407594   | 0.67813    | 1.249723   | 1.302702   | 1.935862   | 1.076051   | 1.129309   | 1.206677   |
| gene-MA16_Dca005858                | 125.632187 | 123.525253 | 121.227722 | 26.417273  | 24.387667  | 27.529501  | 21.937557  | 21.587961  | 18.387304  |
| gene-MA16_Dca006866                | 2.444879   | 2.522476   | 2.232006   | 0.244893   | 0          | 0.34242    | 0          | 0.126135   | 0          |
| gene-MA16_Dca012064                | 10.396387  | 11.850069  | 10.263147  | 5.784807   | 5.427629   | 4.613011   | 5.582949   | 5.500383   | 4.935394   |
| Dendrobium_catenatum_newGene_6737  | 3.014536   | 2.764257   | 2.23494    | 1.208747   | 1.611061   | 1.738263   | 1.076673   | 1.248059   | 1.625067   |
| gene-MA16_Dca003841                | 6.862239   | 5.503376   | 3.361273   | 1.309555   | 0.331048   | 0.646486   | 0.227678   | 0.493474   | 1.088048   |
| gene-MA16_Dca003000                | 32.252464  | 28.10441   | 31.785576  | 6.327178   | 10.884755  | 8.375478   | 22.710356  | 12.950989  | 17.434231  |
| gene-MA16_Dca007544                | 6.318885   | 6.0107     | 7.837581   | 13.218139  | 14.422477  | 12.546339  | 14.770327  | 22.911169  | 14.002497  |
| gene-MA16_Dca007549                | 1.955548   | 1.578927   | 1.289571   | 3.004873   | 3.504802   | 2.562178   | 6.574948   | 3.895455   | 4.376661   |
| gene-MA16_Dca003002                | 2.268007   | 2.191898   | 1.887249   | 0.11054    | 0.063884   | 0.102518   | 0.234293   | 0.354741   | 0          |
| Dendrobium_catenatum_newGene_3617  | 8.646739   | 7.766114   | 8.013858   | 2.417367   | 1.845542   | 1.775366   | 0.809913   | 0.873553   | 0.781013   |
| gene-MA16_Dca005036                | 107.35215  | 96.015953  | 102.886116 | 90.790482  | 90.886482  | 83.028305  | 36.717152  | 34.709213  | 27.920561  |
| gene-MA16_Dca005033                | 23.7894    | 25.247986  | 23.939861  | 6.216903   | 6.118084   | 8.901501   | 10.712378  | 12.137855  | 12.282277  |
| gene-MA16_Dca005030                | 107.772629 | 104.835686 | 114.263725 | 166.822662 | 167.356323 | 165.798752 | 248.163818 | 242.910278 | 228.188354 |
| gene-MA16_Dca018655                | 6.681031   | 7.604597   | 7.038932   | 4.229957   | 3.072587   | 3.560448   | 4.283439   | 4.152862   | 3.818067   |
| gene-MA16_Dca016957                | 11.029781  | 12.940441  | 9.083063   | 5.379364   | 5.431588   | 6.82313    | 3.511517   | 4.865557   | 3.964216   |
| gene-MA16_Dca016950                | 94.205345  | 77.880768  | 92.266724  | 18.953205  | 11.100581  | 19.99865   | 18.671     | 15.836651  | 20.100853  |
| gene-MA16_Dca003471                | 0.660258   | 0.313421   | 0.868782   | 1.289919   | 0.733335   | 1.613842   | 4.778308   | 3.10504    | 3.956651   |
| gene-MA16_Dca003472                | 119.164993 | 124.822136 | 119.488625 | 145.213776 | 137.277634 | 134.568115 | 63.25317   | 58.085396  | 63.392235  |
| gene-MA16_Dca026649                | 10.062496  | 10.555089  | 12.202906  | 4.184744   | 3.762376   | 2.367464   | 4.05512    | 6.557108   | 5.22093    |
| gene-MA16_Dca022822                | 2.289684   | 2.275541   | 2.071321   | 0          | 0          | 0.020238   | 0.05423    | 0          | 0          |
| gene-MA16_Dca022821                | 52.861141  | 53.577187  | 52.261574  | 1.450215   | 2.469512   | 1.373904   | 3.078564   | 1.420292   | 2.445362   |
| gene-MA16_Dca023448                | 64.144676  | 63.466618  | 65.774727  | 17.250164  | 16.290842  | 17.241837  | 30.112104  | 33.371307  | 31.639521  |
| Dendrobium_catenatum_newGene_10821 | 6.662258   | 6.348441   | 7.580664   | 27.433475  | 28.012413  | 31.382768  | 70.469737  | 61.960927  | 62.077546  |
| gene-MA16_Dca017779                | 17.228264  | 18.797699  | 17.861706  | 9.668708   | 12.396991  | 10.977446  | 8.54019    | 7.287602   | 7.805451   |
| gene-MA16_Dca026050                | 520.448486 | 520.62085  | 518.74231  | 226.131119 | 210.271393 | 227.965469 | 390.031097 | 361.332428 | 379.203461 |
| gene-MA16_Dca013291                | 2.689059   | 2.739746   | 3.03121    | 1.929736   | 1.185942   | 1.931035   | 1.527482   | 1.57162    | 1.091305   |
| gene-MA16_Dca013294                | 2.518695   | 2.715612   | 3.08262    | 0.296512   | 0.523823   | 0.256281   | 0.270076   | 0.333983   | 0.359604   |

|                                   |            |            |            |            |            |            |            |            |            |
|-----------------------------------|------------|------------|------------|------------|------------|------------|------------|------------|------------|
| gene-MA16_Dca013296               | 17.229006  | 15.858603  | 15.292431  | 3.391899   | 4.114486   | 3.395364   | 2.980499   | 2.934363   | 2.832683   |
| gene-MA16_Dca018749               | 63.122478  | 60.592896  | 62.975906  | 67.932541  | 62.43182   | 65.776733  | 24.278498  | 21.908884  | 22.729254  |
| gene-MA16_Dca018748               | 1.339821   | 0.837953   | 0.904582   | 2.269755   | 1.299125   | 1.962605   | 3.213668   | 2.628397   | 1.932967   |
| gene-MA16_Dca025096               | 2.459718   | 2.027198   | 2.678389   | 3.949678   | 3.357455   | 4.145884   | 7.781981   | 6.799569   | 5.99374    |
| gene-MA16_Dca015198               | 4.67144    | 4.965937   | 4.672152   | 9.114257   | 9.47165    | 9.514088   | 14.665153  | 15.539238  | 14.152398  |
| gene-MA16_Dca025326               | 87.018547  | 90.162346  | 90.236351  | 101.683861 | 121.705589 | 95.41996   | 191.669434 | 190.215302 | 180.388245 |
| gene-MA16_Dca020314               | 46.40789   | 47.892635  | 46.123772  | 84.152687  | 77.554413  | 80.21064   | 25.556601  | 23.078489  | 22.164566  |
| gene-MA16_Dca007941               | 15.784923  | 15.569082  | 14.40264   | 7.837721   | 9.072017   | 7.704155   | 6.577209   | 4.816784   | 7.277586   |
| gene-MA16_Dca004376               | 3.578394   | 3.476745   | 4.160467   | 5.009146   | 6.931222   | 5.549756   | 8.770145   | 8.5919     | 9.070062   |
| gene-MA16_Dca002239               | 1910.03259 | 1940.08386 | 1959.69666 | 1135.19043 | 1146.15332 | 1127.97888 | 997.542603 | 955.096802 | 980.674011 |
| gene-MA16_Dca009065               | 181.860748 | 176.140503 | 169.562042 | 37.026695  | 39.429256  | 40.153328  | 73.727768  | 67.820824  | 71.077927  |
| gene-MA16_Dca006261               | 59.825027  | 63.6968    | 65.800858  | 30.306126  | 34.692009  | 34.634903  | 29.582573  | 30.115253  | 32.508625  |
| Dendrobium_catenatum_newGene_3423 | 0.704201   | 0.962204   | 0.947303   | 2.162371   | 2.052449   | 2.085981   | 1.508184   | 1.272278   | 1.119129   |
| Dendrobium_catenatum_newGene_5869 | 0.942513   | 0.937604   | 0.767003   | 1.493497   | 1.663312   | 1.829485   | 2.660357   | 2.792852   | 2.866224   |
| gene-MA16_Dca010766               | 19.06148   | 20.816034  | 18.65963   | 33.514557  | 33.438705  | 32.794674  | 44.211727  | 43.238064  | 43.546398  |
| gene-MA16_Dca023768               | 19.572203  | 16.498741  | 17.084135  | 25.576815  | 34.25388   | 23.878635  | 55.340866  | 57.702446  | 58.85643   |
| gene-MA16_Dca026195               | 0          | 0.080965   | 0.258407   | 0.169742   | 0.805613   | 0.544571   | 1.967962   | 1.719849   | 1.2279     |
| gene-MA16_Dca026198               | 124.467888 | 126.471603 | 123.164108 | 30.493629  | 28.785198  | 24.926641  | 32.397064  | 30.002583  | 30.127775  |
| gene-MA16_Dca027862               | 12.238776  | 12.035643  | 11.438347  | 5.049982   | 5.459836   | 5.389506   | 5.743677   | 5.479286   | 4.950338   |
| gene-MA16_Dca015404               | 11.363853  | 12.809128  | 12.672411  | 18.022257  | 17.178896  | 17.176174  | 27.817875  | 28.959772  | 28.584389  |
| gene-MA16_Dca025427               | 1.091564   | 1.492409   | 0.517873   | 2.166934   | 2.250855   | 2.132242   | 17.599218  | 18.381987  | 19.110945  |
| gene-MA16_Dca025424               | 1.753779   | 2.693769   | 2.285885   | 4.431488   | 4.833064   | 4.330845   | 5.607817   | 4.61374    | 5.61764    |
| gene-MA16_Dca017920               | 4.693549   | 4.39219    | 4.087259   | 7.808829   | 8.179956   | 6.45933    | 13.50716   | 13.114467  | 15.831872  |
| gene-MA16_Dca017921               | 7.830634   | 7.610195   | 7.296832   | 10.066652  | 11.950611  | 12.107107  | 24.803402  | 26.185631  | 25.348551  |
| gene-MA16_Dca026733               | 28.286686  | 22.534367  | 22.877234  | 1.024782   | 1.114003   | 0.966574   | 1.06719    | 1.032243   | 1.313436   |
| gene-MA16_Dca024777               | 6.003364   | 4.398547   | 4.764089   | 2.34381    | 0.774823   | 2.030174   | 2.242899   | 2.751791   | 1.866376   |
| gene-MA16_Dca023861               | 1.82575    | 2.1388     | 2.332726   | 0.411637   | 0.973656   | 1.035301   | 0.826388   | 0.93409    | 0.971304   |
| gene-MA16_Dca012184               | 3.420974   | 3.268788   | 3.879191   | 0          | 0          | 0          | 0          | 0          | 0          |

|                                   |            |            |            |            |            |            |            |            |            |
|-----------------------------------|------------|------------|------------|------------|------------|------------|------------|------------|------------|
| Dendrobium_catenatum_newGene_710  | 7.813807   | 6.549833   | 6.761043   | 3.776905   | 4.35705    | 3.546984   | 3.331672   | 3.045914   | 3.11692    |
| gene-MA16_Dca020107               | 76.915894  | 70.869568  | 71.72554   | 129.51593  | 120.652367 | 124.601387 | 254.042267 | 238.123077 | 241.160614 |
| gene-MA16_Dca020104               | 3.493709   | 4.968814   | 2.836146   | 5.213854   | 9.310731   | 10.031557  | 9.275866   | 12.548754  | 11.913565  |
| gene-MA16_Dca027453               | 10.808982  | 10.677159  | 10.304626  | 4.520122   | 6.614183   | 4.380721   | 4.839518   | 3.644601   | 3.884406   |
| gene-MA16_Dca027452               | 1661.33289 | 1504.07666 | 2273.80664 | 590.825012 | 1073.30286 | 628.265442 | 1231.48096 | 992.574646 | 1026.76135 |
| Dendrobium_catenatum_newGene_8958 | 1.928315   | 1.130446   | 1.321844   | 4.660218   | 3.567276   | 2.862543   | 5.933751   | 6.109972   | 5.100896   |
| Dendrobium_catenatum_newGene_8956 | 4.623426   | 4.285929   | 3.991467   | 0.341797   | 0.12456    | 0.174875   | 0.204225   | 0.074545   | 0.166969   |
| gene-MA16_Dca006065               | 3.409974   | 3.907326   | 3.6301     | 7.748889   | 7.4024     | 7.509891   | 10.204731  | 11.80906   | 10.796724  |
| gene-MA16_Dca006063               | 8.481469   | 7.161865   | 6.977128   | 10.764285  | 11.007068  | 10.836043  | 22.354589  | 20.152365  | 17.186569  |
| gene-MA16_Dca006062               | 86.012161  | 92.873032  | 91.70314   | 43.127266  | 45.282543  | 48.814842  | 36.199444  | 35.663273  | 38.9039    |
| gene-MA16_Dca004511               | 97.83709   | 90.334267  | 95.042343  | 125.385262 | 131.38736  | 137.766602 | 206.519714 | 200.223297 | 223.760864 |
| gene-MA16_Dca001590               | 52.87883   | 49.790417  | 48.100636  | 80.511696  | 78.267303  | 79.335556  | 118.59893  | 116.955627 | 117.015808 |
| gene-MA16_Dca001591               | 1.916126   | 2.107506   | 2.136103   | 3.364202   | 3.152975   | 3.24485    | 5.154783   | 5.574709   | 4.251137   |
| gene-MA16_Dca001046               | 114.206688 | 119.99633  | 112.981537 | 45.048969  | 57.696667  | 45.065948  | 36.31852   | 33.168549  | 28.072006  |
| gene-MA16_Dca001048               | 146.618607 | 154.962341 | 139.522476 | 77.938362  | 74.591217  | 75.612373  | 102.053711 | 102.957306 | 97.050499  |
| gene-MA16_Dca005740               | 0.31094    | 0.134806   | 0.31328    | 0.270183   | 0.515296   | 0.417271   | 1.444969   | 1.345396   | 0.935798   |
| gene-MA16_Dca016529               | 25.275816  | 27.249311  | 24.49707   | 11.883848  | 8.031821   | 9.135067   | 1.756264   | 2.590823   | 1.644661   |
| gene-MA16_Dca009380               | 1.52354    | 1.021506   | 2.796734   | 4.117688   | 3.384307   | 2.811982   | 4.321981   | 4.951344   | 5.610135   |
| gene-MA16_Dca009384               | 0.308374   | 0.320866   | 0.449372   | 0.815503   | 0.611357   | 0.810977   | 1.048897   | 1.262155   | 1.091474   |
| gene-MA16_Dca007073               | 77.313622  | 77.469528  | 70.859581  | 34.687851  | 31.464457  | 30.318048  | 37.570595  | 38.167099  | 32.761124  |
| Dendrobium_catenatum_newGene_6350 | 1.632972   | 1.057534   | 1.089851   | 0.857533   | 0.875966   | 0.652039   | 0.169681   | 0.367383   | 1.138154   |
| gene-MA16_Dca013009               | 11.72116   | 11.30366   | 10.968534  | 7.303444   | 8.411302   | 7.920752   | 5.317327   | 5.919452   | 5.607511   |
| gene-MA16_Dca013008               | 169.61731  | 148.132156 | 162.885071 | 167.357712 | 177.895447 | 148.344254 | 393.056061 | 377.310883 | 376.513336 |
| Dendrobium_catenatum_newGene_2635 | 7.446256   | 6.800407   | 7.22574    | 1.818428   | 1.639419   | 1.488659   | 2.636628   | 1.842415   | 2.080906   |
| Dendrobium_catenatum_newGene_4677 | 2.942849   | 4.174388   | 4.53357    | 1.319999   | 3.375437   | 1.097406   | 1.081136   | 1.043313   | 0.558012   |
| gene-MA16_Dca000547               | 6.703961   | 8.00497    | 7.112604   | 13.103999  | 13.501674  | 11.659259  | 16.252195  | 15.449968  | 16.278076  |
| gene-MA16_Dca000541               | 15.129352  | 13.579083  | 15.382708  | 20.777861  | 18.563089  | 28.409908  | 40.845875  | 51.001202  | 54.108959  |
| gene-MA16_Dca027123               | 0.407416   | 0.477583   | 0.284528   | 2.492834   | 2.224434   | 2.322815   | 1.534906   | 0.661331   | 1.133225   |



|                                   |            |            |            |           |           |           |           |           |           |
|-----------------------------------|------------|------------|------------|-----------|-----------|-----------|-----------|-----------|-----------|
| gene-MA16_Dca012154               | 0.41498    | 0.469669   | 0.741807   | 1.562399  | 1.392289  | 0.635942  | 1.219653  | 1.88308   | 1.340336  |
| gene-MA16_Dca023354               | 1.670913   | 1.923087   | 1.698568   | 4.71528   | 3.752436  | 3.764784  | 3.803962  | 2.59629   | 2.428141  |
| gene-MA16_Dca022407               | 2.646155   | 2.960675   | 3.071916   | 5.840163  | 5.220431  | 5.718315  | 20.432537 | 15.278643 | 14.468274 |
| gene-MA16_Dca022406               | 14.239972  | 13.673553  | 13.88761   | 4.648391  | 4.741949  | 6.239476  | 18.154694 | 16.546169 | 16.543728 |
| gene-MA16_Dca017689               | 3.306089   | 2.947726   | 3.235325   | 8.338638  | 7.910751  | 8.180756  | 6.098807  | 6.847921  | 6.300244  |
| gene-MA16_Dca014082               | 114.413925 | 119.853111 | 117.221802 | 6.231662  | 6.457825  | 7.104795  | 4.025798  | 5.256289  | 4.354627  |
| gene-MA16_Dca018850               | 2.659101   | 2.294297   | 3.344862   | 1.100032  | 1.195583  | 0.832997  | 1.765008  | 1.564861  | 1.494903  |
| gene-MA16_Dca015685               | 7.288418   | 8.762541   | 6.897025   | 4.16611   | 3.620675  | 3.115715  | 7.198681  | 6.819463  | 8.076762  |
| Dendrobium_catenatum_newGene_8772 | 4.234008   | 3.169416   | 3.119578   | 5.895502  | 5.740876  | 6.956009  | 8.724307  | 9.670753  | 7.638117  |
| gene-MA16_Dca004897               | 4.406164   | 4.161916   | 3.420366   | 5.119334  | 4.440021  | 4.929059  | 18.576004 | 15.401467 | 14.330288 |
| gene-MA16_Dca004893               | 8.54538    | 12.305061  | 7.353747   | 1.221621  | 1.804851  | 2.293654  | 1.229053  | 0.95882   | 0.766349  |
| gene-MA16_Dca004890               | 63.196629  | 64.751671  | 62.695198  | 44.881947 | 43.21373  | 44.843094 | 34.072308 | 32.14082  | 32.314491 |
| gene-MA16_Dca020734               | 0.543969   | 0.119052   | 1.204739   | 3.507329  | 2.243914  | 3.443012  | 2.195024  | 2.706674  | 3.11534   |
| gene-MA16_Dca001292               | 1.800651   | 1.570033   | 2.135369   | 3.253557  | 3.469544  | 4.897256  | 6.163455  | 5.591477  | 5.590405  |
| gene-MA16_Dca007271               | 7.434366   | 9.003416   | 8.513214   | 6.059476  | 5.83328   | 6.385664  | 4.071405  | 2.872201  | 3.967427  |
| gene-MA16_Dca007277               | 98.54673   | 92.41481   | 101.865456 | 18.657505 | 18.553885 | 18.07082  | 18.163414 | 15.352233 | 14.548734 |
| gene-MA16_Dca007274               | 1.441621   | 1.762321   | 1.279078   | 0.93054   | 0.427963  | 0.4508    | 1.075797  | 1.218566  | 0.80484   |
| gene-MA16_Dca015027               | 21.364756  | 20.7356    | 13.719336  | 19.205076 | 14.568161 | 17.544271 | 9.51307   | 8.865909  | 8.262714  |
| gene-MA16_Dca008360               | 2.657696   | 1.80094    | 2.420908   | 0.712229  | 0.230972  | 0.446861  | 0.151837  | 0.314964  | 0.107     |
| gene-MA16_Dca003037               | 7.78509    | 5.453685   | 7.671699   | 0.792578  | 0         | 1.050403  | 3.761733  | 1.43941   | 0.989735  |
| gene-MA16_Dca001361               | 32.471436  | 32.321648  | 29.572701  | 2.133877  | 1.950404  | 2.045045  | 1.402208  | 0.708046  | 2.015737  |
| gene-MA16_Dca003030               | 86.746193  | 88.993752  | 91.313957  | 71.779175 | 68.511719 | 66.599144 | 43.838463 | 48.019997 | 45.364319 |
| Dendrobium_catenatum_newGene_3878 | 6.682134   | 6.645726   | 7.461062   | 13.450514 | 14.942072 | 13.165996 | 16.251399 | 14.735229 | 15.282365 |
| gene-MA16_Dca002706               | 10.346064  | 10.589922  | 9.908044   | 5.097908  | 5.509735  | 5.07971   | 8.402285  | 8.676934  | 8.457743  |
| gene-MA16_Dca002707               | 1.910859   | 1.656813   | 1.804559   | 0.102799  | 0.358398  | 0.137989  | 0.165628  | 0.246381  | 0.27683   |
| gene-MA16_Dca002708               | 3.208488   | 2.402995   | 3.178525   | 5.26006   | 4.837774  | 4.954382  | 6.686518  | 8.837219  | 8.856949  |
| gene-MA16_Dca003110               | 1.275876   | 1.536465   | 0.977979   | 0.813539  | 0.917797  | 0.651799  | 0.317949  | 0.504134  | 0.834763  |
| Dendrobium_catenatum_newGene_1464 | 85.765961  | 80.129692  | 87.391762  | 42.763138 | 42.057934 | 41.616631 | 41.55991  | 35.83152  | 44.029274 |

|                                    |            |            |            |            |            |            |            |            |            |
|------------------------------------|------------|------------|------------|------------|------------|------------|------------|------------|------------|
| Dendrobium_catenatum_newGene_1461  | 0.98605    | 0.756592   | 0.760497   | 1.724015   | 1.959051   | 1.846154   | 1.231301   | 1.055996   | 1.103395   |
| gene-MA16_Dca004285                | 176.271286 | 170.101715 | 166.609024 | 48.742554  | 52.172909  | 57.114407  | 20.333876  | 17.319166  | 10.836575  |
| Dendrobium_catenatum_newGene_16467 | 12.768607  | 12.800227  | 12.171169  | 3.53236    | 3.641475   | 4.328072   | 2.642265   | 2.607491   | 2.497951   |
| Dendrobium_catenatum_newGene_12372 | 8.043965   | 9.507688   | 6.120464   | 23.637775  | 26.764748  | 22.717142  | 16.559252  | 18.723009  | 16.44779   |
| gene-MA16_Dca011912                | 149.721786 | 152.683548 | 153.321472 | 261.130035 | 262.957458 | 253.558609 | 361.604156 | 355.659241 | 341.234711 |
| gene-MA16_Dca011915                | 4.532511   | 4.567214   | 4.320053   | 6.484455   | 6.460792   | 6.813075   | 8.485785   | 8.571712   | 11.819341  |
| gene-MA16_Dca022396                | 7.071723   | 4.714296   | 5.870857   | 0.081995   | 0          | 0.409011   | 0.439123   | 0.235415   | 0.273648   |
| gene-MA16_Dca008821                | 2.322802   | 2.773945   | 3.421168   | 4.029626   | 4.233087   | 3.953648   | 6.148891   | 6.14921    | 6.240673   |
| Dendrobium_catenatum_newGene_11111 | 3.610821   | 3.308976   | 3.576839   | 4.146888   | 4.395349   | 4.830475   | 8.938966   | 8.132433   | 7.006208   |
| gene-MA16_Dca025017                | 1.027098   | 0.497382   | 0.420539   | 1.809148   | 2.128715   | 1.949613   | 0.814063   | 1.616293   | 1.168128   |
| Dendrobium_catenatum_newGene_230   | 1.343638   | 1.278621   | 1.593014   | 0.149488   | 0.381526   | 0.116292   | 0.072963   | 0.130068   | 0.456728   |
| gene-MA16_Dca013217                | 136.980835 | 129.195541 | 142.793533 | 53.388069  | 59.847702  | 55.888622  | 47.795662  | 47.583134  | 43.970383  |
| gene-MA16_Dca015119                | 24.607077  | 29.464718  | 24.255701  | 7.803403   | 12.025157  | 9.669583   | 11.368976  | 5.456651   | 11.794483  |
| gene-MA16_Dca019470                | 2.219819   | 2.261982   | 2.406603   | 1.036363   | 1.013085   | 0.577231   | 0.629547   | 0.630113   | 1.264649   |
| gene-MA16_Dca020532                | 77.361237  | 83.35685   | 83.549011  | 24.344671  | 20.158585  | 24.939552  | 26.424391  | 27.485149  | 24.043465  |
| gene-MA16_Dca027627                | 86.315277  | 95.133873  | 87.955162  | 129.421921 | 129.871399 | 122.990479 | 267.418335 | 257.556427 | 263.087677 |
| gene-MA16_Dca015801                | 17.270201  | 17.525225  | 17.593023  | 4.948707   | 4.109403   | 5.126971   | 6.007466   | 6.243844   | 5.708197   |
| gene-MA16_Dca015808                | 90.69873   | 87.760162  | 89.978188  | 28.645933  | 26.018818  | 27.170486  | 21.323284  | 21.766745  | 17.596394  |
| gene-MA16_Dca022665                | 2.832663   | 3.472669   | 3.118331   | 8.643416   | 7.591738   | 10.123178  | 7.74286    | 7.498069   | 4.877554   |
| Dendrobium_catenatum_newGene_16703 | 3.045824   | 3.606414   | 3.744803   | 2.546554   | 1.876248   | 2.267938   | 0.914842   | 1.523789   | 1.777164   |
| gene-MA16_Dca026025                | 56.769325  | 55.438282  | 57.745525  | 30.277548  | 29.096914  | 27.980518  | 24.086281  | 29.54282   | 28.372629  |
| gene-MA16_Dca014538                | 4.005242   | 4.511627   | 4.689315   | 5.904057   | 5.274292   | 5.201257   | 12.314268  | 11.298425  | 11.622485  |
| gene-MA16_Dca014537                | 1.873595   | 1.047327   | 1.964401   | 3.875028   | 3.144202   | 2.731858   | 7.478746   | 5.188999   | 7.319672   |
| gene-MA16_Dca019731                | 21.964045  | 20.897247  | 18.653975  | 12.347671  | 12.36586   | 14.302126  | 11.017974  | 8.756812   | 10.457029  |
| gene-MA16_Dca021349                | 10.882627  | 8.957353   | 14.278018  | 1.253541   | 1.447535   | 0.812776   | 0          | 0.460486   | 0.200492   |
| Dendrobium_catenatum_newGene_1664  | 8.925074   | 8.919895   | 11.150193  | 4.872208   | 3.151479   | 4.034495   | 4.004497   | 3.252717   | 3.860888   |
| gene-MA16_Dca004914                | 55.835949  | 58.75576   | 58.447212  | 89.086243  | 86.577591  | 88.606071  | 130.339951 | 127.086334 | 130.33667  |
| Dendrobium_catenatum_newGene_7541  | 1.484905   | 2.204804   | 1.836377   | 2.401323   | 2.831643   | 3.185046   | 4.595843   | 4.160806   | 3.48291    |

|                                    |            |            |            |            |            |            |            |            |            |
|------------------------------------|------------|------------|------------|------------|------------|------------|------------|------------|------------|
| gene-MA16_Dca008782                | 2.796165   | 2.194438   | 2.406086   | 4.623737   | 4.048658   | 3.889519   | 6.864673   | 6.482496   | 5.782689   |
| gene-MA16_Dca008783                | 8.720615   | 8.347756   | 7.37063    | 38.15086   | 35.583481  | 37.524086  | 48.551651  | 48.006336  | 50.293453  |
| gene-MA16_Dca002989                | 1.473424   | 1.104352   | 1.47394    | 0.838709   | 0.433339   | 0.648985   | 1.070597   | 1.284816   | 0.732812   |
| gene-MA16_Dca006408                | 96.901291  | 89.157532  | 90.87265   | 54.969166  | 53.493458  | 55.971554  | 44.921307  | 42.654114  | 45.556698  |
| gene-MA16_Dca001750                | 204.598373 | 198.523697 | 193.958511 | 76.240883  | 77.223877  | 81.440094  | 47.724125  | 48.505913  | 52.913109  |
| Dendrobium_catenatum_newGene_2743  | 508.854248 | 508.185181 | 570.432465 | 243.529034 | 250.639324 | 241.343211 | 218.665971 | 235.599167 | 243.055535 |
| gene-MA16_Dca010457                | 77.091759  | 81.522568  | 78.402328  | 3.999347   | 4.16607    | 4.358573   | 5.430338   | 3.918069   | 3.091871   |
| gene-MA16_Dca012349                | 307.660278 | 297.939148 | 298.841949 | 450.593445 | 438.458374 | 434.572998 | 673.414124 | 632.891724 | 650.762573 |
| gene-MA16_Dca012343                | 37.557217  | 40.844311  | 50.753872  | 17.766821  | 16.646173  | 19.061094  | 23.003824  | 21.121185  | 19.836641  |
| gene-MA16_Dca013438                | 89.122177  | 86.64772   | 88.24823   | 45.500488  | 47.249695  | 49.676693  | 43.782902  | 40.760601  | 37.366428  |
| gene-MA16_Dca000936                | 1.012682   | 0.91452    | 0.740129   | 0.536153   | 0.813321   | 0.306206   | 5.436548   | 6.967587   | 5.674837   |
| gene-MA16_Dca023091                | 43.017014  | 39.901051  | 39.9697    | 2.407141   | 1.586577   | 2.291636   | 1.478651   | 1.198334   | 2.086586   |
| gene-MA16_Dca016149                | 0.865841   | 0.768711   | 0.618445   | 1.056879   | 0.60495    | 0.807716   | 2.210323   | 1.855045   | 1.661149   |
| gene-MA16_Dca026666                | 142.576828 | 147.520309 | 144.386627 | 5.479687   | 6.605347   | 4.588611   | 8.029406   | 8.501561   | 7.656904   |
| Dendrobium_catenatum_newGene_11093 | 0.661603   | 1.529108   | 1.028011   | 0.812269   | 0.615805   | 0.732117   | 0.085788   | 0.202024   | 0.349849   |
| gene-MA16_Dca024403                | 47.223866  | 43.278793  | 45.080486  | 19.230038  | 17.178143  | 17.542439  | 16.325897  | 15.911658  | 14.635517  |
| gene-MA16_Dca014162                | 21.335356  | 23.603275  | 23.090242  | 63.90218   | 59.840954  | 63.899849  | 77.40255   | 72.556267  | 73.194862  |
| gene-MA16_Dca025200                | 8.073725   | 7.256897   | 10.003392  | 4.453538   | 4.228275   | 4.157125   | 5.062358   | 5.414163   | 6.701043   |
| gene-MA16_Dca001510                | 4.893055   | 7.475761   | 6.999546   | 2.007175   | 2.403239   | 2.099967   | 2.757237   | 2.238218   | 2.397241   |
| gene-MA16_Dca001511                | 3.851882   | 4.56981    | 4.602582   | 14.478857  | 13.648626  | 13.167067  | 17.746099  | 25.676208  | 22.560135  |
| gene-MA16_Dca022935                | 10.59439   | 10.867541  | 7.762828   | 3.064256   | 3.350957   | 3.231119   | 2.441514   | 4.081083   | 4.060902   |
| gene-MA16_Dca018340                | 5.089595   | 4.432902   | 3.770317   | 8.251331   | 7.014762   | 7.055127   | 9.888291   | 8.130802   | 10.555983  |
| gene-MA16_Dca018344                | 0.856803   | 0.998957   | 1.531303   | 2.203566   | 2.631888   | 2.361392   | 5.270888   | 3.78842    | 4.279475   |
| gene-MA16_Dca006886                | 3.56479    | 4.523133   | 3.925926   | 4.850202   | 5.410419   | 5.199476   | 17.514982  | 18.928617  | 15.559177  |
| Dendrobium_catenatum_newGene_9590  | 37.724129  | 36.666126  | 35.725456  | 4.798561   | 6.997639   | 6.302513   | 2.711557   | 2.732475   | 3.631899   |
| gene-MA16_Dca014034                | 5.527428   | 6.2225     | 5.647761   | 13.859383  | 12.225949  | 14.434786  | 19.817974  | 17.666439  | 19.80003   |
| gene-MA16_Dca025745                | 10.234913  | 9.639657   | 8.78399    | 2.616171   | 2.127146   | 1.722164   | 3.006016   | 3.529877   | 2.188549   |
| gene-MA16_Dca025744                | 15.920968  | 16.707439  | 19.092176  | 13.087358  | 11.597659  | 12.613782  | 31.503658  | 27.728231  | 25.756603  |

|                                   |           |           |           |           |           |           |           |           |           |
|-----------------------------------|-----------|-----------|-----------|-----------|-----------|-----------|-----------|-----------|-----------|
| Dendrobium_catenatum_newGene_6024 | 4.882432  | 6.694026  | 5.441566  | 3.306891  | 1.883389  | 2.77333   | 2.322168  | 1.882281  | 1.679656  |
| gene-MA16_Dca006308               | 7.754073  | 8.942397  | 8.050686  | 6.257235  | 4.875738  | 4.881703  | 4.122134  | 3.160455  | 2.752733  |
| gene-MA16_Dca009872               | 14.349888 | 14.399882 | 12.320138 | 25.962917 | 24.935143 | 26.55686  | 30.932709 | 30.004986 | 31.592859 |
| gene-MA16_Dca010397               | 28.358528 | 28.593313 | 27.889185 | 21.983921 | 20.480717 | 22.499537 | 14.105028 | 13.665264 | 13.977147 |
| gene-MA16_Dca010393               | 5.388101  | 4.492794  | 3.781018  | 6.494824  | 6.353464  | 6.782239  | 8.381884  | 9.627333  | 12.080458 |
| gene-MA16_Dca000010               | 4.587956  | 3.993433  | 4.677005  | 0.200981  | 0         | 0.701871  | 0.271789  | 0.450908  | 0.117865  |
| gene-MA16_Dca000019               | 1.027167  | 0.842471  | 0.519171  | 0.925542  | 0.75904   | 0.965713  | 2.3647    | 2.809879  | 2.524572  |
| Dendrobium_catenatum_newGene_5013 | 2.29782   | 2.284471  | 2.827226  | 1.292949  | 1.404335  | 1.224984  | 0.812781  | 1.07028   | 0.839837  |
| Dendrobium_catenatum_newGene_5014 | 2.88852   | 2.033785  | 2.071954  | 1.283573  | 0.976806  | 1.46439   | 0.689694  | 0.58479   | 0.6087    |
| gene-MA16_Dca009464               | 5.814496  | 5.40186   | 4.561016  | 11.518147 | 13.340556 | 17.104334 | 17.751581 | 17.496815 | 16.350054 |
| gene-MA16_Dca009469               | 2.299642  | 1.979594  | 2.087144  | 1.732594  | 2.822944  | 1.568362  | 5.688942  | 5.099192  | 4.933382  |
| gene-MA16_Dca002325               | 1.816163  | 1.889038  | 1.369925  | 0.131181  | 0.442032  | 0.937761  | 1.024543  | 0.842273  | 0.974625  |
| gene-MA16_Dca018585               | 8.16694   | 7.971194  | 8.805899  | 1.122398  | 0.703559  | 0.57484   | 0.777311  | 1.170588  | 0.970462  |
| Dendrobium_catenatum_newGene_2377 | 0.4304    | 0.232625  | 0.382503  | 4.232242  | 4.239397  | 4.831122  | 1.040558  | 1.164602  | 0.94287   |
| gene-MA16_Dca026478               | 0.699727  | 0.789355  | 1.183748  | 0.35111   | 0.383744  | 0.175734  | 0.623493  | 0.69351   | 0.755875  |
| gene-MA16_Dca008347               | 3.705968  | 3.38296   | 2.962268  | 10.938956 | 10.763415 | 10.67952  | 3.827157  | 4.316832  | 3.719462  |
| gene-MA16_Dca015242               | 1.22679   | 1.09558   | 1.775598  | 0         | 0         | 0         | 0         | 0.215802  | 0.061102  |
| gene-MA16_Dca006615               | 5.587772  | 6.646594  | 6.658143  | 10.228878 | 12.55405  | 10.028158 | 20.457363 | 20.059931 | 20.134249 |
| gene-MA16_Dca009524               | 9.60886   | 7.979972  | 8.738235  | 19.731348 | 15.716341 | 17.735497 | 28.604383 | 29.656607 | 27.716421 |
| gene-MA16_Dca027324               | 0.549345  | 1.495267  | 0.651959  | 3.348908  | 1.724701  | 1.628218  | 4.371476  | 5.782018  | 4.584309  |
| gene-MA16_Dca020220               | 3.605957  | 4.068065  | 4.054343  | 5.594918  | 5.756899  | 6.71016   | 10.263142 | 10.198313 | 11.70295  |
| gene-MA16_Dca020226               | 88.492393 | 87.899078 | 88.568367 | 12.662827 | 12.64701  | 10.436783 | 19.891563 | 19.056377 | 20.133492 |
| gene-MA16_Dca026750               | 5.155163  | 3.77771   | 4.946677  | 0.057684  | 0.045686  | 0.174401  | 0.054959  | 0.073082  | 0         |
| gene-MA16_Dca026758               | 92.767822 | 77.537949 | 99.263054 | 36.087383 | 69.050613 | 23.212149 | 35.825897 | 43.743557 | 37.281525 |
| Dendrobium_catenatum_newGene_8859 | 4.758147  | 2.822202  | 5.958218  | 5.121674  | 3.519044  | 4.464083  | 1.326965  | 1.875058  | 2.24793   |
| gene-MA16_Dca020895               | 6.274096  | 7.973536  | 5.000211  | 17.550539 | 19.781332 | 16.538702 | 20.126141 | 17.386383 | 16.726572 |
| gene-MA16_Dca006141               | 30.055454 | 28.803637 | 30.582195 | 64.322571 | 56.948776 | 61.108585 | 92.477356 | 76.463478 | 80.073662 |
| gene-MA16_Dca001497               | 1.740569  | 2.339806  | 2.026979  | 0.367746  | 0.330533  | 0.750181  | 0.481934  | 0.615116  | 1.195725  |

|                                    |            |            |            |            |            |            |            |            |            |
|------------------------------------|------------|------------|------------|------------|------------|------------|------------|------------|------------|
| gene-MA16_Dca016402                | 11.58076   | 11.984859  | 10.855188  | 6.413137   | 5.288515   | 5.2822     | 11.071782  | 11.584668  | 9.13138    |
| gene-MA16_Dca016403                | 252.743164 | 242.514542 | 245.226257 | 129.883163 | 125.184616 | 126.113197 | 165.073227 | 163.484634 | 166.081543 |
| gene-MA16_Dca002120                | 213.011734 | 197.26268  | 210.375687 | 1087.3667  | 1106.48547 | 1095.28796 | 1110.86353 | 1112.11426 | 1054.77502 |
| gene-MA16_Dca011999                | 1.085153   | 1.659847   | 1.132041   | 0.323927   | 0.729264   | 0.586856   | 0.749403   | 0.24362    | 0.238076   |
| Dendrobium_catenatum_newGene_2573  | 0.481139   | 0.449209   | 0.489074   | 0.664066   | 0.888036   | 0.848004   | 1.081435   | 1.131105   | 1.202906   |
| gene-MA16_Dca013831                | 44.261166  | 40.856445  | 42.658329  | 13.093921  | 12.586858  | 14.696838  | 14.298408  | 12.661346  | 13.440297  |
| gene-MA16_Dca023421                | 18.111166  | 17.138044  | 18.257439  | 9.991678   | 9.229102   | 10.245271  | 8.376632   | 8.387672   | 7.599804   |
| gene-MA16_Dca019960                | 1.025919   | 1.148127   | 1.275148   | 2.563444   | 2.841049   | 2.518228   | 2.961706   | 2.706289   | 2.85735    |
| gene-MA16_Dca010560                | 21.220621  | 18.489174  | 19.120487  | 0.964356   | 0.37428    | 0.412298   | 0.993838   | 1.025174   | 0.70564    |
| gene-MA16_Dca000221                | 8.555229   | 9.003831   | 10.067516  | 0.977745   | 1.119383   | 1.154479   | 1.604931   | 1.788037   | 1.260812   |
| gene-MA16_Dca000220                | 9.190623   | 8.928535   | 7.289249   | 14.77621   | 14.968014  | 14.422637  | 31.971764  | 33.459248  | 32.261463  |
| gene-MA16_Dca023427                | 28.283545  | 26.404982  | 33.767082  | 2.805453   | 3.247954   | 2.863231   | 2.366801   | 2.221046   | 0.73583    |
| gene-MA16_Dca000224                | 9.300261   | 9.121093   | 9.543278   | 31.97925   | 29.104784  | 28.284006  | 42.799763  | 37.340809  | 39.671219  |
| Dendrobium_catenatum_newGene_10793 | 0.707198   | 0.608136   | 0.800393   | 0.089498   | 0.350906   | 0.208099   | 0.324061   | 0.348233   | 0.227913   |
| gene-MA16_Dca017103                | 0.812609   | 1.220704   | 1.156912   | 0          | 0          | 0.022228   | 0.0286     | 0          | 0          |
| gene-MA16_Dca022561                | 1.933794   | 2.14454    | 1.523724   | 0.910057   | 0.883154   | 0.83847    | 0.749771   | 1.684708   | 1.049011   |
| gene-MA16_Dca018170                | 10.621435  | 10.993655  | 11.321788  | 6.587258   | 5.663874   | 5.225405   | 3.560233   | 2.896431   | 3.253003   |
| gene-MA16_Dca025519                | 119.215965 | 124.782318 | 122.888    | 58.094002  | 56.300117  | 53.403099  | 53.112728  | 51.430264  | 51.599705  |
| gene-MA16_Dca025517                | 6.607812   | 6.741122   | 6.738625   | 2.38197    | 2.491868   | 2.940369   | 12.181029  | 11.543315  | 14.018497  |
| gene-MA16_Dca025514                | 136.79454  | 140.62915  | 134.790283 | 13.155588  | 12.437669  | 11.520442  | 33.867683  | 32.958122  | 37.472115  |
| gene-MA16_Dca017815                | 20.249241  | 18.676661  | 16.571325  | 12.843713  | 9.699461   | 13.106793  | 11.535027  | 7.913401   | 7.91352    |
| gene-MA16_Dca018793                | 1.558772   | 1.302735   | 3.052169   | 0.731633   | 0.872994   | 0.820554   | 0.366174   | 0.108944   | 0.381691   |
| gene-MA16_Dca015418                | 108.755501 | 103.797974 | 108.462288 | 55.43922   | 56.350471  | 55.026642  | 71.73391   | 65.875656  | 71.914062  |
| gene-MA16_Dca015415                | 2.555256   | 1.995716   | 2.56325    | 6.684635   | 6.336207   | 7.330087   | 7.639754   | 5.406802   | 6.702245   |
| gene-MA16_Dca015413                | 341.628265 | 337.375793 | 352.59549  | 317.647369 | 310.881348 | 312.190948 | 117.124001 | 113.845108 | 111.16198  |
| gene-MA16_Dca027821                | 2.759716   | 2.6625     | 2.940537   | 3.294935   | 4.456172   | 3.014166   | 6.016733   | 5.678893   | 8.759887   |
| gene-MA16_Dca001866                | 58.196823  | 63.813133  | 74.737953  | 22.304993  | 19.019548  | 24.286823  | 12.339294  | 14.303495  | 9.02748    |
| gene-MA16_Dca005377                | 51.466057  | 49.99511   | 53.490196  | 17.882328  | 19.031988  | 19.319832  | 10.844859  | 11.464055  | 6.80882    |

|                                    |            |            |            |            |           |            |            |            |            |
|------------------------------------|------------|------------|------------|------------|-----------|------------|------------|------------|------------|
| gene-MA16_Dca005372                | 2.452891   | 2.08035    | 3.224102   | 3.979155   | 4.736447  | 4.96666    | 5.558423   | 5.382217   | 7.774683   |
| gene-MA16_Dca005373                | 73.718773  | 85.784233  | 79.569252  | 20.828077  | 21.09918  | 20.748833  | 14.509983  | 11.591121  | 16.3216    |
| gene-MA16_Dca001281                | 2.841213   | 2.325817   | 3.356121   | 4.364085   | 2.291472  | 2.463334   | 6.172465   | 8.855696   | 6.063423   |
| gene-MA16_Dca008559                | 0.15553    | 0.087517   | 0.091243   | 1.76841    | 1.61549   | 1.414506   | 0.802749   | 1.591424   | 1.261803   |
| gene-MA16_Dca001133                | 22.305557  | 24.396408  | 21.946804  | 12.320278  | 13.107605 | 11.748317  | 44.448971  | 35.876247  | 36.741192  |
| gene-MA16_Dca001134                | 152.673523 | 152.900253 | 150.429459 | 17.051874  | 17.318264 | 19.793001  | 21.892338  | 21.430241  | 23.509729  |
| gene-MA16_Dca026153                | 1.551211   | 1.714196   | 1.093517   | 3.720819   | 5.428409  | 3.540354   | 3.738142   | 4.996802   | 4.438926   |
| gene-MA16_Dca026150                | 0.988681   | 2.004289   | 1.327616   | 0.717789   | 0.58869   | 0.653665   | 0.994714   | 0.384339   | 0.960956   |
| gene-MA16_Dca000424                | 61.210899  | 63.011063  | 58.055523  | 16.430117  | 15.139533 | 14.032263  | 13.850997  | 11.895244  | 12.087526  |
| gene-MA16_Dca016236                | 67.749977  | 70.463326  | 67.440659  | 5.369876   | 4.857898  | 4.612595   | 5.106042   | 5.672922   | 4.262838   |
| gene-MA16_Dca010967                | 0.311754   | 0.803088   | 0.733862   | 1.429555   | 1.190265  | 0.94071    | 2.107182   | 2.56156    | 1.701384   |
| gene-MA16_Dca010962                | 29.033043  | 30.727234  | 31.039978  | 20.045254  | 18.152132 | 20.562241  | 11.333124  | 11.986771  | 10.927546  |
| gene-MA16_Dca023019                | 252.857193 | 247.958496 | 238.971405 | 110.824005 | 97.610489 | 106.781006 | 90.529358  | 81.706215  | 86.129814  |
| gene-MA16_Dca023018                | 32.765442  | 34.209709  | 36.083084  | 16.156961  | 14.341851 | 17.120964  | 13.820833  | 10.428694  | 10.333119  |
| gene-MA16_Dca028045                | 0.039759   | 0.04932    | 0          | 0.020053   | 0         | 0          | 0.616017   | 0.601242   | 0.547373   |
| gene-MA16_Dca026225                | 16.551668  | 22.147516  | 18.440168  | 47.51099   | 49.998985 | 47.427063  | 90.822914  | 87.901459  | 86.377457  |
| gene-MA16_Dca026226                | 732.121155 | 725.705872 | 713.972107 | 2287.13843 | 2149.7124 | 2287.51245 | 2520.51953 | 2434.80737 | 2419.03955 |
| gene-MA16_Dca028599                | 1.130994   | 1.216531   | 1.38308    | 1.810025   | 2.087331  | 1.723135   | 2.591633   | 2.971214   | 3.386519   |
| Dendrobium_catenatum_newGene_11016 | 1.252285   | 1.210948   | 1.255083   | 1.180876   | 0.514931  | 0.505234   | 0          | 0.292206   | 0.146591   |
| gene-MA16_Dca024482                | 1.693079   | 3.007576   | 3.005231   | 3.017795   | 2.776966  | 2.593973   | 5.48022    | 6.826403   | 5.521121   |
| gene-MA16_Dca020679                | 0.431099   | 0.146873   | 0.342135   | 0.92301    | 0.594317  | 0.814393   | 0.387949   | 0.354122   | 0.4035     |
| gene-MA16_Dca020673                | 12.64875   | 12.591898  | 12.017243  | 1.464268   | 1.335179  | 1.580311   | 0.610737   | 0.929808   | 0.896211   |
| gene-MA16_Dca020677                | 34.94939   | 30.560076  | 29.316551  | 3.570502   | 4.564204  | 4.185687   | 3.08377    | 2.913349   | 3.228297   |
| gene-MA16_Dca015926                | 106.913788 | 115.377235 | 118.467857 | 62.63216   | 56.939045 | 57.166634  | 70.947235  | 66.291756  | 69.773048  |
| gene-MA16_Dca011208                | 7.528618   | 7.470519   | 8.454829   | 14.011753  | 15.01071  | 14.604138  | 28.443186  | 28.723366  | 27.29468   |
| Dendrobium_catenatum_newGene_10739 | 0.332822   | 0.713664   | 0.485098   | 1.703595   | 1.417276  | 1.478265   | 1.994323   | 2.314963   | 1.387776   |
| gene-MA16_Dca026142                | 10.446222  | 11.446383  | 10.678606  | 4.402612   | 3.631526  | 3.541536   | 4.417106   | 3.940783   | 3.16315    |
| Dendrobium_catenatum_newGene_819   | 6.575571   | 6.501811   | 6.000533   | 2.180041   | 1.971238  | 1.779161   | 2.526868   | 2.571536   | 2.532628   |

|                                   |            |            |            |            |            |            |            |            |            |
|-----------------------------------|------------|------------|------------|------------|------------|------------|------------|------------|------------|
| gene-MA16_Dca018333               | 949.28241  | 919.058289 | 923.979431 | 250.154297 | 241.308472 | 244.920181 | 193.833237 | 156.229111 | 179.671814 |
| gene-MA16_Dca019073               | 24.769545  | 24.162767  | 26.211189  | 17.559704  | 15.553523  | 17.747362  | 12.695188  | 12.069632  | 12.38583   |
| gene-MA16_Dca005928               | 2.375874   | 2.648099   | 2.72462    | 1.902656   | 1.125716   | 1.877238   | 5.236066   | 3.441818   | 4.637329   |
| gene-MA16_Dca021260               | 35.285572  | 32.538055  | 34.15794   | 3.707411   | 2.812499   | 2.701488   | 2.635644   | 3.147276   | 2.616477   |
| gene-MA16_Dca007388               | 0.842866   | 0.557244   | 1.053967   | 0.773456   | 1.590773   | 1.530478   | 1.730132   | 1.648091   | 2.297564   |
| Dendrobium_catenatum_newGene_7375 | 0.443556   | 0.705      | 0.251015   | 1.584599   | 1.626091   | 1.476466   | 1.662995   | 1.314977   | 1.18389    |
| gene-MA16_Dca007654               | 8.49372    | 7.068706   | 9.47646    | 4.537938   | 4.572447   | 2.70239    | 3.895686   | 3.15133    | 3.32518    |
| gene-MA16_Dca008747               | 1.47208    | 1.5837     | 1.664395   | 2.929284   | 2.160835   | 2.172568   | 3.690018   | 3.623721   | 3.496614   |
| Dendrobium_catenatum_newGene_1754 | 0.469614   | 0.51232    | 0.586188   | 0.518359   | 0.738069   | 0.78545    | 1.056576   | 0.883241   | 1.707001   |
| gene-MA16_Dca011044               | 12.787799  | 10.125554  | 11.611502  | 1.138126   | 0.821369   | 0.472667   | 2.316483   | 1.387914   | 1.54235    |
| gene-MA16_Dca013576               | 171.831009 | 140.965637 | 150.379776 | 130.631073 | 140.780258 | 121.043755 | 67.722885  | 78.382835  | 74.780838  |
| gene-MA16_Dca011591               | 69.947906  | 75.687218  | 70.434029  | 7.597785   | 10.085662  | 7.609946   | 14.245523  | 13.647964  | 13.540539  |
| gene-MA16_Dca016061               | 5.9491     | 5.544788   | 5.939426   | 2.677908   | 2.246278   | 2.799646   | 4.50927    | 3.917487   | 2.921925   |
| gene-MA16_Dca023603               | 46.724915  | 52.466545  | 49.914417  | 85.21254   | 87.205338  | 79.87355   | 31.551378  | 33.91391   | 30.300928  |
| gene-MA16_Dca023605               | 7.04007    | 5.958485   | 5.946958   | 1.023484   | 1.094924   | 1.222636   | 0.57966    | 0.697069   | 0.914032   |
| Dendrobium_catenatum_newGene_3399 | 0.97989    | 0.192551   | 0.29963    | 0.675704   | 0.417018   | 0.289644   | 2.290154   | 1.502521   | 2.000228   |
| gene-MA16_Dca011865               | 0.999458   | 1.406852   | 0.754376   | 0.318562   | 0.335804   | 0.494193   | 0.378839   | 0.882649   | 0.477073   |
| gene-MA16_Dca021710               | 13.199978  | 14.277297  | 14.276307  | 4.981441   | 5.743976   | 4.79753    | 4.792688   | 4.533809   | 4.6699     |
| gene-MA16_Dca003702               | 72.617149  | 69.070999  | 64.962128  | 57.408085  | 51.790691  | 48.643749  | 32.186615  | 29.978544  | 35.534546  |
| gene-MA16_Dca001418               | 2.944957   | 3.256211   | 4.94187    | 2.883372   | 2.514447   | 2.071965   | 0.697472   | 1.192572   | 0.342643   |
| gene-MA16_Dca001413               | 16.462688  | 18.65897   | 16.779016  | 5.114823   | 4.55347    | 4.873744   | 5.782043   | 6.037303   | 6.274166   |
| gene-MA16_Dca018262               | 6.782475   | 6.154939   | 5.783067   | 2.439012   | 1.579098   | 2.400461   | 3.073347   | 2.657521   | 3.32066    |
| gene-MA16_Dca018264               | 2.684251   | 2.852423   | 3.773098   | 0.69853    | 0.454381   | 0.568004   | 1.217218   | 1.43916    | 1.361397   |
| gene-MA16_Dca018267               | 10.067213  | 10.982387  | 10.392176  | 3.67345    | 3.288351   | 3.5508     | 4.771956   | 3.700141   | 4.796836   |
| gene-MA16_Dca018268               | 1.806615   | 1.4158     | 1.057949   | 0.140906   | 0.607275   | 0.856754   | 0.612654   | 0.932538   | 0.91882    |
| gene-MA16_Dca003839               | 57.858212  | 59.432716  | 56.597538  | 29.916237  | 29.432039  | 29.93437   | 24.993193  | 29.908522  | 27.814375  |
| Dendrobium_catenatum_newGene_1289 | 11.46326   | 9.697164   | 12.237211  | 4.357004   | 4.772669   | 4.066924   | 11.769823  | 10.864467  | 10.982005  |
| Dendrobium_catenatum_newGene_3628 | 2.968906   | 2.527402   | 2.688195   | 16.039453  | 14.915609  | 15.938774  | 4.414106   | 5.346712   | 4.47234    |

|                                    |           |            |           |            |            |            |            |            |            |
|------------------------------------|-----------|------------|-----------|------------|------------|------------|------------|------------|------------|
| gene-MA16_Dca005063                | 16.587864 | 19.771488  | 19.91753  | 10.938371  | 10.826444  | 10.077934  | 8.853906   | 8.162964   | 9.942122   |
| Dendrobium_catenatum_newGene_9     | 0.507018  | 0.676081   | 0.821496  | 0.616525   | 1.055825   | 3.305794   | 3.591482   | 0.777701   | 3.031112   |
| gene-MA16_Dca008463                | 2.823394  | 3.64259    | 4.533008  | 4.72086    | 3.613727   | 4.610604   | 9.675799   | 10.155279  | 10.833853  |
| gene-MA16_Dca008467                | 12.975374 | 11.85455   | 10.99712  | 5.320559   | 4.272382   | 5.460196   | 12.021768  | 11.5811    | 13.198703  |
| gene-MA16_Dca008465                | 4.867674  | 3.613553   | 4.838161  | 0.742188   | 1.076436   | 0.861793   | 1.747522   | 1.027289   | 0.964427   |
| gene-MA16_Dca008469                | 3.413318  | 3.348155   | 3.423125  | 5.629082   | 4.617532   | 5.176291   | 18.346773  | 14.700353  | 16.24041   |
| gene-MA16_Dca011651                | 6.865251  | 6.806225   | 7.524023  | 3.366661   | 3.214192   | 3.215873   | 4.194395   | 5.868392   | 4.942164   |
| Dendrobium_catenatum_newGene_10545 | 7.155502  | 7.058623   | 6.904812  | 4.267537   | 4.454436   | 4.488244   | 2.962741   | 3.518232   | 2.887952   |
| gene-MA16_Dca028284                | 16.185398 | 16.751328  | 14.964081 | 1.058247   | 1.276956   | 0.917177   | 4.209849   | 3.022573   | 4.207426   |
| gene-MA16_Dca028281                | 15.134158 | 13.158403  | 16.324169 | 12.414881  | 13.008434  | 11.10838   | 6.157328   | 5.516811   | 7.217138   |
| gene-MA16_Dca022875                | 81.840263 | 85.622284  | 89.019943 | 50.12574   | 41.428089  | 38.459045  | 63.761314  | 58.804005  | 61.62558   |
| gene-MA16_Dca023476                | 16.232174 | 17.999943  | 19.471254 | 8.336483   | 6.235082   | 9.327372   | 5.539313   | 4.822375   | 5.927828   |
| gene-MA16_Dca018713                | 98.44796  | 100.338547 | 96.388618 | 51.516888  | 55.801174  | 53.040237  | 52.841179  | 48.385471  | 52.948338  |
| gene-MA16_Dca026641                | 18.126915 | 18.062618  | 17.669073 | 9.821965   | 9.279745   | 9.473364   | 14.689713  | 17.086878  | 17.212072  |
| gene-MA16_Dca026640                | 6.971038  | 6.550737   | 7.855937  | 2.836335   | 3.859008   | 3.4589     | 4.345571   | 3.332228   | 3.045506   |
| gene-MA16_Dca015496                | 6.708527  | 4.65718    | 5.577894  | 9.266246   | 9.448975   | 10.255515  | 14.430096  | 13.533048  | 13.2908    |
| gene-MA16_Dca029217                | 9.270505  | 6.633779   | 6.882226  | 3.463231   | 4.500679   | 2.556904   | 3.211625   | 3.992568   | 2.185001   |
| gene-MA16_Dca021690                | 37.139637 | 36.383545  | 29.478867 | 41.204185  | 43.449707  | 44.172371  | 20.227413  | 20.686943  | 20.065033  |
| gene-MA16_Dca020348                | 96.302498 | 97.565369  | 94.993881 | 43.87727   | 36.576603  | 40.309521  | 39.379536  | 33.739708  | 37.322411  |
| gene-MA16_Dca020342                | 0.645446  | 0.329599   | 0.53921   | 3.482883   | 3.232454   | 4.022128   | 2.250903   | 2.07943    | 1.912197   |
| gene-MA16_Dca021962                | 98.78904  | 88.71772   | 98.980515 | 34.483875  | 34.183754  | 37.870995  | 24.056789  | 22.49024   | 22.358814  |
| gene-MA16_Dca006778                | 2.368168  | 2.446516   | 2.064425  | 8.591846   | 7.436104   | 7.934191   | 16.012934  | 14.987633  | 14.607403  |
| Dendrobium_catenatum_newGene_9917  | 0.616765  | 0.89495    | 1.098056  | 1.890943   | 1.932741   | 2.249655   | 1.551087   | 2.137291   | 1.612918   |
| gene-MA16_Dca004662                | 23.40205  | 25.370775  | 23.663509 | 11.291018  | 12.076785  | 11.782909  | 15.394571  | 15.033395  | 14.660193  |
| gene-MA16_Dca003320                | 7.116269  | 7.93994    | 6.503732  | 1.417706   | 1.439374   | 1.851343   | 1.162248   | 1.482587   | 1.589351   |
| gene-MA16_Dca003119                | 70.531548 | 75.579468  | 74.464622 | 202.231522 | 212.517212 | 191.724167 | 314.640289 | 289.335815 | 287.670654 |
| Dendrobium_catenatum_newGene_9135  | 1.311562  | 0.993969   | 1.651445  | 0.877758   | 0.730269   | 0.652204   | 0.900859   | 0.342892   | 0.599881   |
| gene-MA16_Dca009019                | 5.358969  | 4.276191   | 3.15156   | 2.56809    | 2.173584   | 1.830581   | 14.573848  | 11.10007   | 6.949927   |



|                     |            |            |            |            |            |            |            |            |            |
|---------------------|------------|------------|------------|------------|------------|------------|------------|------------|------------|
| gene-MA16_Dca009014 | 6.444288   | 6.092557   | 4.980994   | 13.239332  | 12.696191  | 15.255171  | 20.458738  | 18.65239   | 18.93742   |
| gene-MA16_Dca009017 | 55.611916  | 53.157707  | 52.630802  | 21.66827   | 21.046682  | 25.834688  | 14.878572  | 14.944002  | 14.913679  |
| gene-MA16_Dca009012 | 23.901239  | 26.215778  | 24.359667  | 9.540107   | 10.341967  | 11.361591  | 6.190558   | 8.251167   | 7.869957   |
| gene-MA16_Dca007145 | 31.471151  | 32.662968  | 30.67379   | 17.236904  | 15.348781  | 16.227909  | 17.950165  | 18.149025  | 17.262167  |
| gene-MA16_Dca007147 | 93.643349  | 95.968933  | 94.882828  | 29.573528  | 29.61504   | 30.645018  | 22.165922  | 24.535528  | 23.383253  |
| gene-MA16_Dca008052 | 30.317226  | 29.057217  | 26.885494  | 15.048295  | 16.079865  | 15.16668   | 14.830524  | 12.299467  | 11.774773  |
| gene-MA16_Dca008051 | 28.888678  | 30.696463  | 29.840031  | 14.494408  | 13.761619  | 14.883574  | 9.866388   | 11.07675   | 10.119022  |
| gene-MA16_Dca009907 | 2.312975   | 0.665284   | 0.734661   | 1.678398   | 3.163344   | 2.542322   | 2.936614   | 3.742344   | 4.639638   |
| gene-MA16_Dca009904 | 1.325097   | 1.362832   | 1.033323   | 2.495892   | 1.255375   | 1.969444   | 2.929507   | 4.088364   | 4.732332   |
| gene-MA16_Dca009908 | 14.54183   | 15.40506   | 14.067255  | 8.21646    | 7.647273   | 7.796744   | 7.317972   | 6.55442    | 5.899791   |
| gene-MA16_Dca010738 | 1.250884   | 2.207764   | 2.084664   | 2.669716   | 2.063452   | 1.910114   | 3.911587   | 3.983621   | 4.413041   |
| gene-MA16_Dca011281 | 52.725166  | 52.671528  | 52.283314  | 9.412738   | 8.397141   | 8.853532   | 11.767727  | 10.766691  | 10.790006  |
| gene-MA16_Dca000308 | 19.614595  | 23.716368  | 22.55022   | 22.912096  | 23.821207  | 28.609646  | 10.90484   | 10.489718  | 11.916895  |
| gene-MA16_Dca016888 | 603.947876 | 602.379395 | 567.983154 | 365.997009 | 349.325043 | 349.609497 | 252.212051 | 260.274017 | 266.984985 |
| gene-MA16_Dca012399 | 1.260387   | 0.66705    | 0.805497   | 2.809612   | 3.058767   | 3.332803   | 2.939306   | 3.125373   | 4.109109   |
| gene-MA16_Dca012394 | 1.641442   | 2.07926    | 2.106665   | 3.255493   | 3.210859   | 2.271854   | 7.047347   | 6.457549   | 7.108379   |
| gene-MA16_Dca027329 | 3.928813   | 3.215216   | 3.360544   | 4.223713   | 4.410557   | 4.528058   | 7.862309   | 9.515631   | 9.725063   |
| gene-MA16_Dca025902 | 9.575163   | 10.0739    | 10.765448  | 5.261813   | 4.164512   | 5.767371   | 6.277825   | 5.466222   | 4.735012   |
| gene-MA16_Dca013113 | 12.825636  | 12.534278  | 13.64326   | 2.299388   | 1.85792    | 2.090989   | 2.775342   | 2.843372   | 2.796179   |
| gene-MA16_Dca013112 | 10.179093  | 10.143894  | 9.482707   | 3.131333   | 3.253405   | 2.791494   | 1.693021   | 1.431994   | 1.876942   |
| gene-MA16_Dca013117 | 0.889451   | 1.220706   | 1.63139    | 0.195738   | 0.690739   | 1.396405   | 3.956519   | 3.702786   | 4.074036   |
| gene-MA16_Dca025659 | 23.733147  | 25.920965  | 21.215134  | 5.301977   | 5.685905   | 7.1819     | 19.955221  | 20.11882   | 21.508366  |
| gene-MA16_Dca027810 | 319.561371 | 269.869354 | 285.340027 | 85.321266  | 218.817795 | 96.387672  | 87.512093  | 128.427231 | 133.51384  |
| gene-MA16_Dca018036 | 379.343689 | 348.991241 | 485.741669 | 129.260513 | 121.112648 | 81.246109  | 125.623642 | 117.35244  | 222.982788 |
| gene-MA16_Dca014247 | 112.899147 | 116.95784  | 103.843445 | 41.779541  | 42.84581   | 45.130634  | 45.113144  | 44.344158  | 45.385796  |
| gene-MA16_Dca018695 | 8.693293   | 9.320556   | 9.748586   | 15.850699  | 15.10154   | 19.721375  | 6.160647   | 4.71144    | 6.503725   |
| gene-MA16_Dca018694 | 7.470375   | 9.679241   | 8.963505   | 26.80444   | 26.612316  | 29.780893  | 10.026383  | 12.945946  | 10.738317  |
| gene-MA16_Dca018690 | 122.054375 | 117.000046 | 117.822777 | 29.431305  | 25.771423  | 27.820192  | 31.688051  | 32.235428  | 33.772083  |

|                     |            |            |            |            |            |            |            |            |            |
|---------------------|------------|------------|------------|------------|------------|------------|------------|------------|------------|
| gene-MA16_Dca018699 | 2.984626   | 3.437412   | 4.665084   | 15.269617  | 16.658665  | 14.191979  | 7.407703   | 6.1391     | 6.538416   |
| gene-MA16_Dca018962 | 0.324192   | 0.813232   | 1.204233   | 2.667842   | 2.621475   | 2.140319   | 3.982478   | 2.435743   | 6.12093    |
| gene-MA16_Dca015517 | 1.044936   | 1.099827   | 1.018943   | 0.280337   | 0.113146   | 0.402044   | 0.422906   | 0.215718   | 0.153416   |
| gene-MA16_Dca020137 | 65.369835  | 67.24054   | 70.539261  | 143.933868 | 129.225494 | 133.892746 | 185.997894 | 179.073044 | 185.989563 |
| gene-MA16_Dca020134 | 6.410837   | 4.791124   | 3.937508   | 0.11044    | 0.152803   | 0          | 0.53964    | 0.187866   | 0.51566    |
| gene-MA16_Dca007306 | 5.090106   | 7.669803   | 5.183772   | 4.530561   | 4.407712   | 4.467977   | 15.143767  | 12.177982  | 12.055692  |
| gene-MA16_Dca007305 | 16.852285  | 12.895952  | 14.482527  | 5.47746    | 6.018644   | 7.066004   | 3.283035   | 3.610683   | 3.388945   |
| gene-MA16_Dca007304 | 55.173328  | 55.001282  | 48.157104  | 37.069012  | 33.599369  | 34.241894  | 28.782585  | 26.989313  | 25.244812  |
| gene-MA16_Dca007303 | 32.925018  | 30.091869  | 30.274574  | 17.462292  | 14.192596  | 13.671166  | 19.818018  | 19.51502   | 18.253981  |
| gene-MA16_Dca008217 | 129.716629 | 124.100121 | 118.952477 | 51.763607  | 50.880573  | 55.245792  | 113.667091 | 118.04483  | 122.454636 |
| gene-MA16_Dca007895 | 68.691536  | 66.566673  | 68.917862  | 26.396496  | 25.536783  | 25.545631  | 27.41165   | 26.810568  | 26.500223  |
| gene-MA16_Dca005796 | 53.729137  | 57.885994  | 52.946007  | 25.173546  | 24.193537  | 25.971106  | 23.510866  | 22.833662  | 22.870302  |
| gene-MA16_Dca005797 | 1.935967   | 1.94911    | 2.315183   | 0.553289   | 2.124795   | 1.296108   | 0.687286   | 1.396574   | 0.663569   |
| gene-MA16_Dca005793 | 18.021198  | 17.06636   | 18.036459  | 9.044072   | 10.023428  | 9.56897    | 6.07549    | 6.570643   | 6.647848   |
| gene-MA16_Dca005791 | 2.997373   | 3.251534   | 3.347579   | 5.339863   | 4.267497   | 4.424253   | 6.196261   | 7.542376   | 6.895044   |
| gene-MA16_Dca000676 | 123.972763 | 112.215454 | 113.2416   | 46.777443  | 45.078957  | 44.029537  | 61.312096  | 59.011147  | 59.819374  |
| gene-MA16_Dca000675 | 24.804773  | 23.350206  | 24.659071  | 9.658016   | 12.958136  | 12.398504  | 15.849529  | 18.529081  | 12.292338  |
| gene-MA16_Dca006855 | 72.067513  | 76.789719  | 77.353111  | 46.475639  | 44.889961  | 46.770905  | 38.05228   | 34.509594  | 37.062218  |
| gene-MA16_Dca016579 | 3.927036   | 3.585207   | 4.45588    | 5.702477   | 3.953971   | 5.709353   | 8.842226   | 9.795663   | 7.875183   |
| gene-MA16_Dca026306 | 12.795215  | 13.027137  | 13.577705  | 7.178463   | 6.513945   | 7.083001   | 7.551565   | 9.166694   | 8.691971   |
| gene-MA16_Dca022154 | 1.643467   | 1.488676   | 2.170542   | 3.817102   | 3.313264   | 3.733408   | 4.165439   | 4.045149   | 3.605567   |
| gene-MA16_Dca008152 | 235.053497 | 229.51738  | 238.150024 | 56.468521  | 64.353928  | 65.110733  | 64.468056  | 65.831375  | 55.049206  |
| gene-MA16_Dca019893 | 2.417095   | 1.780635   | 1.998387   | 5.202117   | 4.624671   | 4.094976   | 3.467844   | 3.846714   | 3.656248   |
| gene-MA16_Dca011361 | 0.621419   | 0.596667   | 0.564959   | 1.117505   | 0.744209   | 0.723264   | 2.063568   | 2.918485   | 2.137708   |
| gene-MA16_Dca023364 | 0.653835   | 0.763858   | 0.672258   | 1.453218   | 1.14924    | 1.092451   | 1.680768   | 1.875719   | 2.34305    |
| gene-MA16_Dca014072 | 852.050781 | 824.974731 | 829.908936 | 372.686005 | 361.678955 | 364.883698 | 549.329529 | 522.794861 | 527.484009 |
| gene-MA16_Dca014074 | 0.766962   | 0.542229   | 0.739591   | 0.173202   | 0.250485   | 0.286697   | 0.253253   | 0.217921   | 0.205856   |
| gene-MA16_Dca021182 | 2.191517   | 2.481121   | 1.845765   | 0.672948   | 0.440921   | 0.331353   | 0.832813   | 0.533257   | 0.551843   |

|                                   |            |            |            |            |            |            |            |            |            |
|-----------------------------------|------------|------------|------------|------------|------------|------------|------------|------------|------------|
| gene-MA16_Dca021189               | 32.753418  | 31.811121  | 32.436485  | 15.038392  | 16.027367  | 14.482791  | 17.641647  | 16.953897  | 17.053555  |
| Dendrobium_catenatum_newGene_3418 | 10.794722  | 15.722825  | 13.87149   | 13.892771  | 15.663375  | 11.847767  | 34.942154  | 26.130512  | 29.649212  |
| gene-MA16_Dca015041               | 4.424187   | 4.765575   | 3.723241   | 0.73693    | 1.541375   | 2.345964   | 0.62881    | 0.622483   | 0          |
| gene-MA16_Dca006641               | 1.321687   | 1.069549   | 1.201557   | 2.650806   | 3.246193   | 2.995661   | 5.714129   | 6.023852   | 7.675829   |
| gene-MA16_Dca002303               | 193.611008 | 192.071198 | 198.910782 | 21.109529  | 21.88006   | 25.802702  | 16.150877  | 14.323799  | 15.352753  |
| Dendrobium_catenatum_newGene_3840 | 0.98879    | 0.424067   | 0.890942   | 0.634041   | 1.132045   | 0.700076   | 2.712863   | 2.176581   | 2.671184   |
| Dendrobium_catenatum_newGene_3846 | 1.09898    | 1.259354   | 1.204224   | 1.640886   | 1.865328   | 1.98814    | 2.354686   | 2.801543   | 2.47648    |
| gene-MA16_Dca002484               | 14.409959  | 14.785685  | 14.731377  | 4.032681   | 7.109028   | 6.037743   | 8.157214   | 9.179873   | 8.459051   |
| Dendrobium_catenatum_newGene_5733 | 5.525897   | 6.956408   | 7.355767   | 4.478266   | 5.72226    | 5.3532     | 2.311739   | 2.423181   | 2.074062   |
| gene-MA16_Dca009701               | 0.563581   | 0.45037    | 0.319104   | 0.980701   | 0.748576   | 0.997428   | 1.545613   | 1.988775   | 1.638842   |
| gene-MA16_Dca012530               | 0.275096   | 0.253203   | 0.367537   | 0.390129   | 0.099232   | 0.220816   | 2.428449   | 0.911798   | 1.40118    |
| gene-MA16_Dca026539               | 10.193298  | 10.366797  | 9.586534   | 9.690078   | 9.699807   | 8.487202   | 3.982047   | 3.860395   | 4.666499   |
| gene-MA16_Dca011948               | 8.344669   | 8.869973   | 7.692373   | 19.172443  | 21.241625  | 17.460951  | 16.015345  | 15.916806  | 15.551606  |
| gene-MA16_Dca014277               | 898.657959 | 903.099731 | 904.802856 | 229.145462 | 228.832199 | 212.11557  | 334.866241 | 311.345734 | 305.814026 |
| gene-MA16_Dca025374               | 25.811794  | 21.362949  | 25.060007  | 8.365833   | 8.742832   | 9.825624   | 7.151851   | 7.494291   | 7.509059   |
| gene-MA16_Dca025379               | 16.230112  | 17.227327  | 20.275394  | 13.673971  | 13.135267  | 13.745014  | 43.997791  | 44.726173  | 40.177563  |
| gene-MA16_Dca019447               | 8.42485    | 8.4992     | 6.536578   | 17.765064  | 17.324612  | 16.802505  | 25.733583  | 28.89806   | 28.876265  |
| gene-MA16_Dca024023               | 18.542877  | 21.658182  | 19.100195  | 15.07841   | 14.246099  | 13.478417  | 9.327307   | 8.725049   | 9.009778   |
| gene-MA16_Dca024029               | 2.440618   | 2.715139   | 2.701225   | 3.744281   | 3.552038   | 4.290771   | 5.321865   | 5.471243   | 6.001993   |
| gene-MA16_Dca027610               | 0.964627   | 0.745197   | 0.479478   | 0.285862   | 0.113176   | 0.323543   | 1.702698   | 1.415548   | 1.094452   |
| gene-MA16_Dca027619               | 1.663582   | 2.300179   | 2.36713    | 1.22344    | 1.929946   | 1.18052    | 0.750313   | 0.417522   | 0.999412   |
| gene-MA16_Dca014390               | 36.096188  | 34.127811  | 34.173271  | 16.423399  | 17.038223  | 15.177027  | 18.754923  | 18.920315  | 21.242676  |
| gene-MA16_Dca017203               | 0.79032    | 1.690363   | 1.370809   | 6.791312   | 4.0301     | 5.460779   | 3.320572   | 3.84       | 5.244882   |
| gene-MA16_Dca017200               | 349.582245 | 340.890442 | 339.972107 | 81.882446  | 80.603752  | 77.35778   | 82.516029  | 80.380531  | 73.617699  |
| gene-MA16_Dca007497               | 6.215485   | 8.212347   | 8.678372   | 0.986791   | 1.093551   | 1.859781   | 0          | 0.251969   | 0.347146   |
| gene-MA16_Dca007722               | 532.826843 | 533.483887 | 555.722107 | 155.870682 | 149.078232 | 152.267883 | 128.214905 | 126.144424 | 124.317307 |
| gene-MA16_Dca005385               | 0.471585   | 0.127881   | 0.197533   | 0.824244   | 1.243644   | 0.948055   | 3.073376   | 2.537963   | 2.987296   |
| gene-MA16_Dca005656               | 85.55835   | 85.616943  | 81.554008  | 40.670517  | 37.365097  | 37.563427  | 28.638418  | 26.883448  | 27.291018  |

|                                    |            |            |            |            |            |           |           |            |            |
|------------------------------------|------------|------------|------------|------------|------------|-----------|-----------|------------|------------|
| gene-MA16_Dca008584                | 1.190022   | 0.84879    | 1.378798   | 1.957494   | 1.715355   | 1.95642   | 2.463129  | 3.839568   | 4.013127   |
| gene-MA16_Dca000481                | 1.058425   | 0.719235   | 0.338908   | 3.144359   | 2.946942   | 3.833131  | 1.641676  | 1.623795   | 1.865176   |
| gene-MA16_Dca000380                | 10.371916  | 8.552205   | 9.512497   | 6.111792   | 6.483858   | 6.629917  | 4.659355  | 3.842952   | 4.469344   |
| gene-MA16_Dca010400                | 1.808502   | 1.180245   | 1.329434   | 2.048101   | 2.39764    | 2.258643  | 5.305511  | 4.962591   | 4.122353   |
| gene-MA16_Dca020815                | 4.899353   | 5.062459   | 6.613253   | 14.846392  | 11.995029  | 13.671292 | 14.051229 | 14.24761   | 13.064181  |
| gene-MA16_Dca020810                | 30.858473  | 33.947319  | 35.231197  | 57.982098  | 55.044964  | 58.73111  | 85.577415 | 85.662941  | 79.383347  |
| gene-MA16_Dca020812                | 4.337313   | 4.177366   | 6.073018   | 6.091506   | 9.750486   | 8.989821  | 10.595086 | 13.265145  | 9.621828   |
| gene-MA16_Dca001727                | 1.782887   | 2.764784   | 2.563348   | 4.094702   | 3.994733   | 4.670829  | 5.035712  | 5.742408   | 6.013641   |
| gene-MA16_Dca000966                | 5.319585   | 2.579937   | 2.665336   | 1.861241   | 2.676761   | 1.711015  | 1.846832  | 1.408442   | 0.496161   |
| gene-MA16_Dca011463                | 21.140387  | 21.044851  | 21.395021  | 10.144481  | 10.316228  | 10.234278 | 10.863132 | 11.32523   | 10.765289  |
| gene-MA16_Dca011462                | 12.064708  | 12.777987  | 11.940871  | 0.907838   | 0.575967   | 0.429539  | 1.723881  | 0.554943   | 1.095164   |
| gene-MA16_Dca013198                | 27.584528  | 29.636742  | 28.954584  | 33.522583  | 28.836208  | 31.083294 | 61.435516 | 61.54969   | 60.916992  |
| gene-MA16_Dca002524                | 5.03904    | 4.427201   | 4.503254   | 8.386313   | 5.358562   | 6.641744  | 11.539202 | 11.379706  | 10.257733  |
| gene-MA16_Dca002526                | 559.716858 | 565.232178 | 569.973511 | 738.286072 | 746.131165 | 743.04248 | 347.9328  | 352.801605 | 332.146545 |
| gene-MA16_Dca025941                | 22.38105   | 16.262701  | 30.109186  | 8.54624    | 13.561095  | 10.453119 | 17.18297  | 13.927875  | 17.81601   |
| Dendrobium_catenatum_newGene_11594 | 2.656078   | 3.008658   | 2.624823   | 0.619317   | 0.870847   | 1.018139  | 1.004305  | 0.521821   | 0.968096   |
| gene-MA16_Dca017441                | 1.610715   | 1.553366   | 1.453351   | 2.248899   | 1.605207   | 1.413113  | 4.801464  | 2.48858    | 2.817476   |
| gene-MA16_Dca018618                | 3.161424   | 3.147516   | 3.497315   | 1.643412   | 1.16414    | 0.944072  | 3.239728  | 3.735869   | 3.221155   |
| gene-MA16_Dca018612                | 38.53109   | 36.212391  | 35.823475  | 60.867661  | 59.132523  | 64.206078 | 80.399658 | 77.054359  | 75.871513  |
| gene-MA16_Dca017996                | 8.017375   | 6.897339   | 4.720355   | 10.657601  | 9.134937   | 7.974691  | 21.520962 | 18.640364  | 19.71339   |
| gene-MA16_Dca017990                | 133.356079 | 122.609894 | 133.012543 | 49.739906  | 42.664711  | 40.81015  | 45.636234 | 42.878704  | 38.865414  |
| gene-MA16_Dca015597                | 4.775516   | 3.260525   | 3.753537   | 6.318737   | 6.066564   | 6.138925  | 7.710476  | 10.448767  | 7.151751   |
| gene-MA16_Dca024727                | 22.31003   | 22.09791   | 22.167137  | 6.76254    | 6.848701   | 6.020261  | 8.494752  | 6.340964   | 4.787319   |
| gene-MA16_Dca024723                | 5.439923   | 4.171961   | 4.71359    | 0.160004   | 1.708423   | 0.475431  | 0         | 0          | 0          |
| gene-MA16_Dca024720                | 1.487278   | 1.065509   | 1.011148   | 3.340936   | 3.153025   | 4.586792  | 2.430288  | 2.175185   | 1.458786   |
| Dendrobium_catenatum_newGene_3731  | 0.653676   | 0.345157   | 1.025134   | 2.24899    | 3.195064   | 1.959064  | 1.216854  | 1.785599   | 0.975524   |
| gene-MA16_Dca025238                | 0.098165   | 0.406165   | 0.219175   | 0.073797   | 0.032943   | 0.220104  | 0.478846  | 0.555555   | 0.792953   |
| gene-MA16_Dca005808                | 0.216872   | 0.159731   | 0.110571   | 0.667187   | 0.811852   | 0.697396  | 0.953424  | 1.07273    | 1.190197   |

|                                    |            |            |            |            |           |            |            |            |            |
|------------------------------------|------------|------------|------------|------------|-----------|------------|------------|------------|------------|
| Dendrobium_catenatum_newGene_768   | 4.019314   | 5.14575    | 4.334263   | 2.14876    | 2.284604  | 1.350915   | 1.022033   | 1.81158    | 0.92983    |
| gene-MA16_Dca016167                | 7.752482   | 10.148689  | 9.98968    | 4.355995   | 4.828404  | 2.974681   | 6.293858   | 6.55318    | 5.434861   |
| gene-MA16_Dca008007                | 4.345789   | 4.458572   | 4.354389   | 5.109112   | 6.503052  | 10.808836  | 7.998702   | 10.717733  | 12.155592  |
| Dendrobium_catenatum_newGene_1042  | 15.930976  | 19.364831  | 21.540021  | 6.218424   | 6.152319  | 6.154141   | 6.840532   | 8.999627   | 10.474699  |
| Dendrobium_catenatum_newGene_2107  | 0.204509   | 0.338794   | 0.641733   | 0.659027   | 1.17951   | 0.891154   | 1.442508   | 0.574563   | 1.783296   |
| gene-MA16_Dca002050                | 11.232977  | 10.966715  | 10.60883   | 0.309893   | 0.20808   | 0.354941   | 0.280281   | 0.559429   | 0.530668   |
| gene-MA16_Dca009354                | 2.18757    | 2.900082   | 2.316392   | 0.187393   | 0.411806  | 0.399318   | 0          | 0.09721    | 0          |
| gene-MA16_Dca009355                | 69.176628  | 71.145638  | 68.07827   | 37.798859  | 38.776108 | 35.856441  | 23.422266  | 21.958534  | 21.433397  |
| gene-MA16_Dca020852                | 2.715713   | 1.972909   | 2.622575   | 1.495724   | 0.951771  | 1.376289   | 0.969714   | 0.769966   | 0.57124    |
| Dendrobium_catenatum_newGene_2664  | 39.678501  | 41.349209  | 42.175476  | 20.308483  | 17.476192 | 18.157053  | 13.805913  | 15.382375  | 10.656768  |
| gene-MA16_Dca024524                | 1.898959   | 1.032146   | 1.782915   | 0.334253   | 0.279187  | 0          | 0.156832   | 0.419364   | 0.408701   |
| Dendrobium_catenatum_newGene_13970 | 0.545893   | 1.513429   | 0.844921   | 3.050728   | 5.670893  | 6.446211   | 5.499332   | 3.929718   | 0.223764   |
| Dendrobium_catenatum_newGene_5979  | 1.358165   | 1.947503   | 1.382445   | 0.909196   | 0.85085   | 1.116776   | 0.288836   | 0.365457   | 0.33107    |
| Dendrobium_catenatum_newGene_5970  | 5.384611   | 4.710621   | 5.86324    | 8.873344   | 8.497638  | 9.660842   | 10.800802  | 10.281336  | 12.693626  |
| gene-MA16_Dca019812                | 887.424622 | 915.425842 | 890.745361 | 390.320557 | 380.70932 | 364.794586 | 601.830383 | 634.393066 | 646.929443 |
| gene-MA16_Dca019813                | 748.215759 | 720.500427 | 710.21228  | 263.022705 | 259.22345 | 274.203156 | 449.53299  | 425.255219 | 424.716248 |
| gene-MA16_Dca026794                | 51.075684  | 49.008541  | 47.393353  | 94.09774   | 90.569435 | 91.93692   | 225.418091 | 227.484558 | 216.179352 |
| gene-MA16_Dca000029                | 0.15169    | 0          | 0.28309    | 0.685521   | 0.427011  | 0.632977   | 6.159358   | 6.228363   | 5.636611   |
| gene-MA16_Dca000028                | 4.725649   | 5.180632   | 3.333565   | 6.07097    | 7.28661   | 6.991711   | 10.368555  | 11.368128  | 9.541744   |
| gene-MA16_Dca012298                | 24.454439  | 26.277891  | 24.295191  | 12.86046   | 12.40812  | 12.947224  | 15.644504  | 20.392572  | 18.024769  |
| gene-MA16_Dca010185                | 1.554097   | 0.524951   | 0.663342   | 0.630816   | 0.58534   | 0.520962   | 2.569962   | 1.672819   | 3.522513   |
| gene-MA16_Dca003598                | 9.919669   | 9.372254   | 9.61075    | 17.499849  | 15.391805 | 17.942038  | 26.411592  | 22.928329  | 25.221962  |
| gene-MA16_Dca003593                | 2.338643   | 1.085583   | 2.294432   | 3.457264   | 2.628177  | 3.214871   | 8.275218   | 5.76441    | 6.277719   |
| gene-MA16_Dca003597                | 82.768242  | 78.453423  | 81.56929   | 39.288078  | 41.370819 | 38.475842  | 57.491211  | 51.268074  | 52.757614  |
| gene-MA16_Dca010182                | 3.482524   | 4.074446   | 4.146635   | 2.041531   | 1.628441  | 1.612704   | 2.79986    | 2.487923   | 3.629059   |
| gene-MA16_Dca023503                | 2.014002   | 1.683705   | 1.987057   | 1.153468   | 1.948287  | 1.288241   | 7.937744   | 5.59586    | 10.255259  |
| gene-MA16_Dca022456                | 1.235513   | 1.419089   | 1.292834   | 1.934532   | 1.981085  | 2.445054   | 2.844915   | 2.724367   | 3.133138   |
| Dendrobium_catenatum_newGene_8707  | 0.449868   | 0.207815   | 0.091125   | 0.485745   | 0.890705  | 0.447184   | 0.49332    | 0.841562   | 0.579367   |

|                                   |            |            |            |            |            |            |            |            |            |
|-----------------------------------|------------|------------|------------|------------|------------|------------|------------|------------|------------|
| gene-MA16_Dca021107               | 67.185791  | 69.585854  | 66.72747   | 81.70089   | 75.314842  | 84.823082  | 16.409086  | 23.942966  | 28.450966  |
| gene-MA16_Dca007220               | 221.346542 | 227.687469 | 223.894958 | 31.430809  | 30.094379  | 29.827766  | 29.637871  | 28.886993  | 27.002615  |
| gene-MA16_Dca020767               | 1.438292   | 1.436549   | 1.590937   | 2.375122   | 1.618962   | 1.195091   | 4.115778   | 4.193816   | 3.474206   |
| Dendrobium_catenatum_newGene_8880 | 2.466138   | 2.672189   | 2.227686   | 0.884712   | 0.754729   | 0.923438   | 0.704779   | 1.166249   | 0.718983   |
| gene-MA16_Dca027236               | 0.759645   | 0.921167   | 0.740063   | 3.208868   | 1.230677   | 2.648923   | 2.958967   | 3.311887   | 2.05701    |
| gene-MA16_Dca006171               | 16.514355  | 14.567722  | 13.886663  | 8.272305   | 8.135243   | 8.434796   | 4.092099   | 2.887554   | 3.323155   |
| gene-MA16_Dca006175               | 19.144567  | 18.79743   | 16.90806   | 7.278165   | 7.179939   | 5.851008   | 7.166083   | 5.654205   | 5.077168   |
| gene-MA16_Dca011134               | 5.32612    | 4.330866   | 4.56981    | 2.306627   | 2.003102   | 3.084558   | 2.437765   | 2.49059    | 2.800688   |
| gene-MA16_Dca025263               | 11.694567  | 10.70698   | 12.442569  | 20.58066   | 25.883768  | 22.486567  | 25.326273  | 29.684446  | 25.533237  |
| gene-MA16_Dca005528               | 115.396606 | 96.005653  | 98.524597  | 12.946404  | 11.838531  | 13.732891  | 21.330143  | 18.834076  | 15.345201  |
| gene-MA16_Dca005525               | 179.35025  | 164.83754  | 164.967102 | 22.286554  | 21.03647   | 28.615896  | 38.127247  | 37.767097  | 31.11359   |
| gene-MA16_Dca005524               | 186.006699 | 164.301941 | 181.93718  | 62.006191  | 68.422508  | 63.88398   | 69.157127  | 63.243202  | 59.7215    |
| gene-MA16_Dca005527               | 533.242188 | 471.332611 | 496.993134 | 51.775402  | 50.40115   | 49.231144  | 75.313469  | 67.972633  | 65.807274  |
| gene-MA16_Dca006955               | 2.743775   | 2.779238   | 2.848416   | 4.118694   | 4.115356   | 3.767846   | 6.239816   | 6.033001   | 5.557      |
| Dendrobium_catenatum_newGene_8069 | 31.394188  | 30.930319  | 32.27816   | 12.085054  | 11.69854   | 10.847578  | 10.940348  | 11.894461  | 12.245987  |
| gene-MA16_Dca003207               | 1.560552   | 1.527998   | 2.091428   | 2.601847   | 0.967061   | 0.35623    | 3.847263   | 4.141474   | 4.005361   |
| gene-MA16_Dca008872               | 3.131532   | 4.299159   | 3.443979   | 7.869205   | 8.930686   | 7.893217   | 13.271404  | 13.125601  | 12.718551  |
| gene-MA16_Dca013846               | 38.068634  | 36.829529  | 39.90723   | 26.132177  | 24.397907  | 26.619499  | 173.891479 | 161.400848 | 162.860977 |
| gene-MA16_Dca013842               | 7.263982   | 9.309824   | 9.00397    | 2.415619   | 2.802207   | 1.682025   | 2.569001   | 3.120694   | 3.702202   |
| gene-MA16_Dca014812               | 311.72525  | 323.192566 | 321.484375 | 139.943314 | 129.689865 | 125.238762 | 61.121605  | 59.270809  | 59.460335  |
| gene-MA16_Dca015149               | 33.248051  | 32.289589  | 31.563421  | 17.492102  | 15.121733  | 17.138733  | 16.741577  | 16.399807  | 17.492668  |
| gene-MA16_Dca015147               | 2.909635   | 2.832942   | 3.723447   | 7.704414   | 7.555339   | 8.292742   | 9.46551    | 9.675029   | 8.936082   |
| gene-MA16_Dca015145               | 0.771377   | 0.425223   | 0.262652   | 4.454967   | 3.741653   | 3.867323   | 0.550255   | 1.016249   | 0.273616   |
| gene-MA16_Dca019997               | 33.750778  | 27.175594  | 29.758247  | 8.540755   | 5.867078   | 7.41974    | 2.671927   | 2.654626   | 4.36274    |
| gene-MA16_Dca017178               | 115.451378 | 108.773018 | 103.106804 | 46.603004  | 41.752789  | 45.668026  | 33.054508  | 29.921328  | 25.996323  |
| gene-MA16_Dca017173               | 19.336533  | 19.201605  | 19.150002  | 9.941567   | 7.786643   | 9.114739   | 6.091285   | 4.951392   | 5.207516   |
| gene-MA16_Dca017172               | 0.163491   | 0.250523   | 0.118501   | 0.366034   | 0.413622   | 0.458283   | 2.468953   | 1.231857   | 2.319067   |
| gene-MA16_Dca026079               | 11.67833   | 14.044689  | 11.501451  | 3.683478   | 3.936134   | 4.104624   | 3.200452   | 3.759115   | 2.879843   |

|                                    |            |            |            |            |            |            |            |            |            |
|------------------------------------|------------|------------|------------|------------|------------|------------|------------|------------|------------|
| gene-MA16_Dca016398                | 1.857871   | 2.272393   | 1.574294   | 0.316343   | 0.168099   | 0.153624   | 0.390886   | 0.49213    | 0.766093   |
| gene-MA16_Dca016399                | 20.326731  | 21.579302  | 22.236448  | 9.042265   | 10.199821  | 10.719116  | 14.475559  | 13.626364  | 11.661735  |
| gene-MA16_Dca025523                | 51.556007  | 49.706688  | 52.144615  | 19.747984  | 21.01272   | 22.425045  | 22.866022  | 23.944086  | 21.220274  |
| gene-MA16_Dca025528                | 60.630783  | 64.980164  | 65.992355  | 3.662153   | 2.144803   | 3.532797   | 10.217051  | 9.604431   | 11.107584  |
| gene-MA16_Dca015466                | 22.579287  | 22.155016  | 21.689901  | 13.532557  | 13.127431  | 14.719129  | 10.252819  | 9.520087   | 10.594346  |
| gene-MA16_Dca004944                | 5.733602   | 6.336013   | 8.199449   | 1.055672   | 1.386088   | 0.930826   | 5.543314   | 5.607158   | 4.188497   |
| gene-MA16_Dca004940                | 0.823815   | 0.477738   | 0.893901   | 1.50088    | 1.361117   | 2.100525   | 1.893633   | 2.856189   | 2.296662   |
| gene-MA16_Dca020046                | 5.72787    | 6.20252    | 5.788178   | 5.734928   | 5.978353   | 4.579897   | 1.627634   | 1.919508   | 2.416589   |
| gene-MA16_Dca007414                | 2.651121   | 2.816613   | 2.285018   | 0.525677   | 0.875887   | 0.902798   | 6.086767   | 4.570544   | 5.792255   |
| gene-MA16_Dca001811                | 248.491318 | 250.042572 | 225.427933 | 75.550278  | 61.065815  | 70.823601  | 36.95546   | 29.315142  | 26.168261  |
| gene-MA16_Dca006453                | 3.068717   | 3.233343   | 3.31516    | 6.622801   | 6.97361    | 5.301672   | 9.827422   | 8.116958   | 11.43172   |
| Dendrobium_catenatum_newGene_15067 | 5.583955   | 7.517403   | 9.44493    | 20.179384  | 20.367041  | 18.880051  | 22.284964  | 19.857594  | 19.076054  |
| gene-MA16_Dca008501                | 29.539108  | 32.052567  | 28.571424  | 11.492794  | 10.447053  | 11.472989  | 11.970285  | 7.434385   | 10.254706  |
| gene-MA16_Dca008504                | 1.787463   | 1.648157   | 1.912628   | 0.752284   | 0.585974   | 0.983734   | 0.805161   | 0.661424   | 0.650557   |
| gene-MA16_Dca008507                | 18.925858  | 15.41357   | 17.04962   | 4.159838   | 3.593842   | 2.552166   | 1.662547   | 2.389171   | 2.355934   |
| gene-MA16_Dca004162                | 3.825505   | 5.496087   | 5.007257   | 11.780788  | 11.581245  | 11.092031  | 10.351626  | 9.132016   | 9.486937   |
| gene-MA16_Dca004160                | 213.039566 | 208.427307 | 212.454407 | 12.106178  | 9.070713   | 10.648921  | 13.432404  | 13.076633  | 16.225132  |
| gene-MA16_Dca001102                | 93.857582  | 92.125389  | 90.441376  | 60.759491  | 58.68895   | 62.708088  | 38.472607  | 42.273022  | 38.359936  |
| gene-MA16_Dca001101                | 75.232384  | 74.010269  | 76.266281  | 6.893085   | 5.630816   | 6.107984   | 8.835839   | 8.168061   | 7.642563   |
| gene-MA16_Dca010936                | 15.280392  | 15.339925  | 14.626529  | 6.858426   | 6.818599   | 6.666075   | 9.725429   | 9.852855   | 9.399885   |
| gene-MA16_Dca023046                | 129.760269 | 114.275444 | 121.172607 | 26.999525  | 28.544146  | 31.64991   | 26.18679   | 23.58602   | 22.892223  |
| gene-MA16_Dca012473                | 0          | 0.247744   | 0.028327   | 0.212407   | 0.407735   | 0.294088   | 1.226492   | 1.124105   | 0.88346    |
| gene-MA16_Dca022795                | 228.969009 | 251.556656 | 236.223755 | 185.268356 | 175.958466 | 196.709991 | 108.38076  | 130.103104 | 128.215897 |
| gene-MA16_Dca022799                | 20.393299  | 18.454945  | 17.527811  | 8.025134   | 7.132232   | 2.421449   | 4.041787   | 3.483346   | 2.767312   |
| gene-MA16_Dca009591                | 1.301757   | 1.211967   | 1.725958   | 2.23915    | 3.517606   | 3.235964   | 4.15936    | 4.693065   | 3.503868   |
| gene-MA16_Dca009592                | 473.672943 | 455.146271 | 460.230377 | 888.869141 | 905.220886 | 903.296753 | 1060.33533 | 1039.44885 | 1013.9458  |
| Dendrobium_catenatum_newGene_3223  | 0.980487   | 0.738736   | 0.972262   | 0.99242    | 1.854123   | 0.408185   | 2.680229   | 1.955954   | 1.539524   |
| Dendrobium_catenatum_newGene_451   | 7.053555   | 5.970802   | 5.701611   | 3.307627   | 4.699877   | 4.247851   | 1.566929   | 2.570813   | 4.241997   |

|                                    |            |            |            |           |           |           |           |           |           |
|------------------------------------|------------|------------|------------|-----------|-----------|-----------|-----------|-----------|-----------|
| Dendrobium_catenatum_newGene_14943 | 2.34905    | 1.705369   | 2.60686    | 2.760422  | 1.838034  | 3.539566  | 15.379344 | 15.30184  | 17.106535 |
| gene-MA16_Dca019560                | 8.013308   | 4.225912   | 5.568601   | 13.277834 | 11.40656  | 8.924573  | 43.398529 | 41.538612 | 42.974648 |
| gene-MA16_Dca019562                | 4.202849   | 4.079117   | 5.088237   | 1.355723  | 1.123715  | 1.775101  | 2.477196  | 2.344514  | 2.893087  |
| gene-MA16_Dca019563                | 160.471008 | 169.367065 | 166.929489 | 40.316147 | 42.741062 | 44.099758 | 49.025311 | 43.472019 | 43.851524 |
| gene-MA16_Dca010167                | 77.285698  | 74.032234  | 74.428864  | 9.238434  | 8.771581  | 9.458076  | 12.063521 | 11.608277 | 11.139237 |
| gene-MA16_Dca010166                | 6.308721   | 6.100961   | 6.048888   | 1.524613  | 1.566818  | 1.360393  | 2.870044  | 2.42615   | 2.161471  |
| gene-MA16_Dca020688                | 6.632674   | 7.244302   | 6.769938   | 9.497178  | 8.23056   | 9.738404  | 16.952627 | 15.303642 | 17.336435 |
| gene-MA16_Dca013939                | 0.194267   | 0.182994   | 0.556982   | 0.515295  | 0.536146  | 0.546182  | 0.871811  | 1.176281  | 0.797366  |
| Dendrobium_catenatum_newGene_11813 | 1.826185   | 1.33654    | 1.704167   | 1.13318   | 1.221061  | 1.189812  | 0.21757   | 0.484196  | 0.430265  |
| gene-MA16_Dca019021                | 0.920623   | 0.779287   | 0.913451   | 0.818195  | 1.548877  | 0.698432  | 6.445184  | 7.908681  | 8.422147  |
| gene-MA16_Dca017328                | 2.772764   | 2.892      | 2.396942   | 7.33218   | 6.047855  | 5.944423  | 6.508593  | 7.118917  | 6.733454  |
| gene-MA16_Dca014670                | 43.47641   | 43.060452  | 43.794991  | 19.549305 | 19.513361 | 19.976635 | 23.562979 | 23.833181 | 22.640957 |
| gene-MA16_Dca019040                | 1.423468   | 1.534026   | 1.253029   | 0.697033  | 0.526435  | 0.389426  | 0.810265  | 0.468583  | 0.550382  |
| gene-MA16_Dca019049                | 3.978786   | 3.851472   | 5.844205   | 5.182283  | 8.809846  | 9.19537   | 9.415807  | 10.939322 | 11.114021 |
| gene-MA16_Dca022697                | 4.568428   | 4.236438   | 4.03999    | 2.385293  | 0.817767  | 1.867894  | 1.420006  | 1.140743  | 3.300927  |
| gene-MA16_Dca022690                | 28.240803  | 28.764423  | 24.810625  | 8.929134  | 10.624861 | 11.360116 | 7.754346  | 8.341541  | 6.513264  |
| gene-MA16_Dca026533                | 3.240096   | 2.737158   | 2.075059   | 1.634938  | 0.205874  | 0.799246  | 1.047403  | 1.693033  | 0.223815  |
| gene-MA16_Dca001602                | 5.521608   | 4.510112   | 4.870068   | 1.928232  | 1.688653  | 1.304392  | 3.142128  | 2.061867  | 1.810784  |
| gene-MA16_Dca005113                | 18.152613  | 22.314344  | 20.433121  | 42.89069  | 41.8339   | 45.196766 | 53.099098 | 55.822792 | 52.809742 |
| gene-MA16_Dca010362                | 4.862666   | 3.940715   | 4.351807   | 2.197182  | 1.441533  | 0.947458  | 2.113658  | 2.497583  | 1.956746  |
| gene-MA16_Dca008773                | 11.288926  | 10.538422  | 11.752018  | 3.843439  | 5.517171  | 4.237564  | 3.364383  | 3.357075  | 2.935828  |
| gene-MA16_Dca008771                | 0.179149   | 0.243473   | 0.165401   | 0         | 0.22225   | 0.100788  | 0.772925  | 1.089541  | 0.770707  |
| gene-MA16_Dca012213                | 31.093159  | 30.998981  | 30.342966  | 11.275664 | 11.732406 | 11.37408  | 21.021063 | 17.73567  | 18.84453  |
| gene-MA16_Dca012211                | 18.877409  | 17.550228  | 14.403371  | 9.996808  | 8.051886  | 8.672988  | 10.712219 | 11.459189 | 11.642278 |
| gene-MA16_Dca003516                | 55.295078  | 60.812496  | 55.234333  | 35.1506   | 34.857166 | 38.503807 | 26.823938 | 30.908741 | 31.271729 |
| gene-MA16_Dca003517                | 0.298891   | 0.314821   | 0.439832   | 0.69404   | 0.349042  | 0.838837  | 2.857539  | 1.767149  | 1.662456  |
| gene-MA16_Dca020910                | 2.455927   | 2.175433   | 1.948765   | 0.079243  | 0.126464  | 0.237377  | 0         | 0.033876  | 0         |
| gene-MA16_Dca020914                | 29.633787  | 31.682037  | 29.266249  | 1.578321  | 0.700205  | 0.715633  | 0.577627  | 0.571733  | 0.560269  |



|                                    |            |            |            |            |            |            |            |            |            |
|------------------------------------|------------|------------|------------|------------|------------|------------|------------|------------|------------|
| Dendrobium_catenatum_newGene_15803 | 127.071617 | 140.260773 | 142.7229   | 61.627811  | 53.304585  | 60.718349  | 111.916725 | 120.423447 | 122.784073 |
| gene-MA16_Dca016013                | 5.213151   | 4.636063   | 4.607662   | 1.991107   | 2.476514   | 2.598956   | 2.534185   | 2.234238   | 2.329602   |
| gene-MA16_Dca008434                | 31.209221  | 32.307568  | 31.044704  | 2.407508   | 1.765796   | 1.399499   | 1.253975   | 0.774989   | 0.428936   |
| gene-MA16_Dca026404                | 0.664593   | 0.618131   | 0.505326   | 2.889944   | 2.184184   | 1.806644   | 3.611903   | 4.110118   | 4.74719    |
| gene-MA16_Dca015652                | 5.293404   | 5.839169   | 4.832485   | 6.88639    | 6.002416   | 7.320254   | 19.354296  | 17.95225   | 20.859938  |
| gene-MA16_Dca018550                | 72.059891  | 74.786125  | 79.972382  | 18.843571  | 15.392159  | 17.476072  | 15.213865  | 17.534704  | 15.101478  |
| gene-MA16_Dca014302                | 117.761246 | 121.477821 | 125.368576 | 50.944759  | 43.565475  | 52.168236  | 62.749382  | 57.587311  | 58.991497  |
| gene-MA16_Dca014300                | 2.131427   | 1.98257    | 2.530414   | 0.433159   | 0.925935   | 1.067581   | 2.963613   | 2.812089   | 2.573381   |
| gene-MA16_Dca025173                | 47.703014  | 43.174854  | 48.242371  | 5.430444   | 4.796428   | 6.469054   | 8.951611   | 9.742276   | 8.778501   |
| gene-MA16_Dca020275                | 1.804589   | 1.379895   | 2.455508   | 0.504014   | 0.49719    | 0.396284   | 1.469779   | 0.760788   | 1.303821   |
| gene-MA16_Dca020277                | 0.228723   | 0.176163   | 0.141479   | 0.535823   | 0.708175   | 0.437834   | 0.728674   | 0.869642   | 0.813369   |
| gene-MA16_Dca002474                | 1.250256   | 1.175351   | 0.589512   | 0.808854   | 1.474242   | 1.077039   | 2.383011   | 2.407506   | 2.426568   |
| gene-MA16_Dca026892                | 655.632141 | 684.623047 | 665.584839 | 294.152008 | 291.229034 | 306.368286 | 210.108566 | 187.169434 | 181.23819  |
| gene-MA16_Dca026890                | 9.08408    | 8.023445   | 8.841059   | 18.525467  | 19.287216  | 19.212996  | 30.457644  | 30.989496  | 29.548176  |
| gene-MA16_Dca023910                | 0.79186    | 0.699657   | 1.0803     | 2.223272   | 1.931582   | 1.054652   | 2.683832   | 3.345649   | 2.234621   |
| gene-MA16_Dca020554                | 6.154253   | 7.61986    | 8.877049   | 12.705159  | 15.005067  | 14.329482  | 15.298503  | 16.032419  | 17.791252  |
| gene-MA16_Dca017514                | 92.602203  | 94.48362   | 94.906067  | 46.94614   | 44.472137  | 42.981873  | 42.707794  | 39.78508   | 40.796356  |
| gene-MA16_Dca004256                | 6.970449   | 8.110442   | 8.156381   | 1.758091   | 2.375263   | 2.964234   | 0.080206   | 0.276588   | 0.131353   |
| gene-MA16_Dca004258                | 18.441154  | 17.280806  | 18.262506  | 6.731085   | 6.606772   | 7.041055   | 4.223835   | 5.060592   | 5.730293   |
| gene-MA16_Dca011578                | 0.473682   | 1.384397   | 0.892812   | 1.863745   | 2.362208   | 2.928278   | 1.265939   | 1.789797   | 1.590328   |
| Dendrobium_catenatum_newGene_5226  | 0.811021   | 0.516623   | 0.833404   | 1.397375   | 1.473361   | 1.664697   | 0.772605   | 1.145995   | 0.958445   |
| gene-MA16_Dca004877                | 544.850769 | 524.394226 | 512.61731  | 78.631096  | 76.70385   | 72.713287  | 70.876648  | 61.859562  | 57.786243  |
| gene-MA16_Dca012829                | 8.238028   | 9.315829   | 9.008012   | 4.572725   | 3.001802   | 4.264084   | 4.925028   | 6.25777    | 5.866009   |
| gene-MA16_Dca002849                | 0.136807   | 0.064582   | 0.175591   | 0.352808   | 0.07116    | 0.575246   | 2.00845    | 1.638916   | 1.449564   |
| Dendrobium_catenatum_newGene_3670  | 70.966054  | 76.492573  | 78.117173  | 16.673395  | 15.69377   | 16.962841  | 17.047425  | 16.595215  | 16.336002  |
| gene-MA16_Dca019913                | 15.566405  | 14.252094  | 15.255806  | 4.158259   | 4.893451   | 5.047127   | 5.962121   | 7.588264   | 4.440612   |
| gene-MA16_Dca010533                | 19.958347  | 19.037514  | 20.122768  | 3.741804   | 3.255405   | 2.665926   | 14.138098  | 12.734688  | 11.373866  |
| gene-MA16_Dca014286                | 23.628922  | 25.610783  | 25.626652  | 14.800207  | 12.799897  | 14.246221  | 10.516511  | 12.009134  | 9.206665   |

|                                    |            |            |            |           |           |           |           |           |           |
|------------------------------------|------------|------------|------------|-----------|-----------|-----------|-----------|-----------|-----------|
| gene-MA16_Dca014287                | 10.466929  | 11.813188  | 8.487899   | 4.466177  | 4.194758  | 4.476305  | 5.210565  | 5.489786  | 5.302284  |
| gene-MA16_Dca012007                | 145.319885 | 135.779007 | 126.600128 | 42.552231 | 50.43734  | 51.437305 | 62.552567 | 65.193008 | 60.076    |
| gene-MA16_Dca012004                | 123.493698 | 132.677109 | 119.679939 | 32.363567 | 31.821388 | 33.780457 | 30.835548 | 27.2861   | 26.516914 |
| gene-MA16_Dca012005                | 2.136492   | 1.317793   | 2.569156   | 1.96465   | 2.726016  | 1.617659  | 3.802835  | 8.07404   | 4.777398  |
| gene-MA16_Dca012009                | 2.273502   | 2.190506   | 1.861911   | 6.372496  | 5.624137  | 6.877514  | 10.507814 | 10.890984 | 10.109139 |
| gene-MA16_Dca003497                | 14.071625  | 14.693346  | 14.372046  | 8.829383  | 8.859178  | 10.037336 | 7.424939  | 7.540785  | 6.990135  |
| gene-MA16_Dca003496                | 5.399819   | 6.748681   | 5.83302    | 21.558374 | 22.323925 | 19.941719 | 7.402001  | 5.969971  | 4.338418  |
| gene-MA16_Dca003490                | 6.447836   | 7.273532   | 6.465577   | 1.311658  | 1.373633  | 1.387332  | 1.716136  | 1.841815  | 1.784604  |
| Dendrobium_catenatum_newGene_16265 | 2.122388   | 2.16225    | 2.089203   | 1.761647  | 2.14582   | 1.279894  | 0.552622  | 0.803301  | 0.62394   |
| gene-MA16_Dca009201                | 32.697166  | 29.579685  | 30.776131  | 4.979127  | 4.278012  | 4.207698  | 4.7615    | 4.370044  | 4.996428  |
| gene-MA16_Dca012583                | 14.066031  | 12.091744  | 12.63749   | 7.92166   | 5.752188  | 7.373288  | 6.59329   | 5.36708   | 6.037907  |
| gene-MA16_Dca012581                | 6.560632   | 6.859134   | 4.294645   | 0         | 0         | 0.789125  | 0.487853  | 0.26702   | 0.216664  |
| gene-MA16_Dca012587                | 112.292778 | 104.684441 | 101.954102 | 37.983269 | 36.880558 | 39.311111 | 41.802956 | 40.055874 | 36.359154 |
| gene-MA16_Dca012589                | 6.146739   | 8.448561   | 9.708661   | 4.891635  | 3.63851   | 3.832142  | 4.338809  | 5.366244  | 5.472278  |
| gene-MA16_Dca019274                | 1.422439   | 0.763748   | 0.724966   | 1.058999  | 1.724734  | 1.13301   | 3.199625  | 4.33897   | 2.567777  |
| gene-MA16_Dca021067                | 0.676584   | 1.120292   | 0.21748    | 2.499221  | 2.894427  | 1.356303  | 2.40807   | 2.459791  | 3.396497  |
| gene-MA16_Dca021396                | 51.145821  | 54.961819  | 57.737324  | 6.885603  | 6.428008  | 6.633959  | 8.821249  | 7.599355  | 8.201691  |
| gene-MA16_Dca021398                | 5.170457   | 6.679111   | 7.309778   | 11.477241 | 12.099767 | 10.503963 | 18.745495 | 14.806131 | 15.763996 |
| gene-MA16_Dca021399                | 12.015894  | 7.630285   | 10.708616  | 3.102843  | 3.658335  | 2.628489  | 2.34308   | 1.907243  | 3.735467  |
| gene-MA16_Dca021931                | 5.362659   | 6.243409   | 4.058394   | 5.966723  | 8.631639  | 9.393509  | 14.371451 | 11.595048 | 12.221441 |
| gene-MA16_Dca002010                | 10.183562  | 12.585708  | 11.048365  | 6.016959  | 6.332484  | 5.073012  | 17.370602 | 17.096443 | 15.975649 |
| gene-MA16_Dca002014                | 17.876841  | 22.198605  | 21.069746  | 2.81749   | 1.786525  | 2.904439  | 4.643345  | 4.157517  | 3.844856  |
| Dendrobium_catenatum_newGene_1863  | 7.062341   | 7.199961   | 7.733477   | 10.00007  | 11.416843 | 10.022616 | 5.375591  | 4.424488  | 4.837381  |
| gene-MA16_Dca003121                | 19.650799  | 15.317845  | 19.854052  | 59.088211 | 56.425838 | 58.875481 | 89.888153 | 95.178574 | 89.316284 |
| gene-MA16_Dca002293                | 0.850444   | 0.32759    | 0.129798   | 1.14786   | 0.708671  | 1.076286  | 4.414571  | 4.067217  | 5.500182  |
| gene-MA16_Dca008939                | 0.348774   | 0.584096   | 0.429628   | 2.126063  | 3.094063  | 2.325522  | 1.524232  | 0.987165  | 2.070717  |
| gene-MA16_Dca013344                | 2.479622   | 2.73217    | 1.558628   | 1.68539   | 1.72893   | 1.711362  | 0.518201  | 1.355281  | 0.786514  |
| gene-MA16_Dca025721                | 34.026985  | 33.804504  | 31.076284  | 49.010967 | 42.736839 | 41.291992 | 80.856438 | 71.618607 | 75.730301 |

|                     |            |            |           |            |            |            |            |            |            |
|---------------------|------------|------------|-----------|------------|------------|------------|------------|------------|------------|
| gene-MA16_Dca016113 | 2.642287   | 2.371832   | 2.280964  | 1.737677   | 2.154685   | 1.446947   | 0.988578   | 1.040187   | 0.915284   |
| gene-MA16_Dca028830 | 5.059188   | 5.810926   | 5.543142  | 1.486292   | 2.278932   | 2.47497    | 0.905648   | 1.996997   | 1.281556   |
| gene-MA16_Dca003623 | 58.409744  | 59.165051  | 52.836163 | 31.908451  | 34.413174  | 37.14056   | 24.280426  | 29.303635  | 27.533817  |
| gene-MA16_Dca000336 | 80.655502  | 76.291962  | 74.671043 | 140.981674 | 183.309433 | 181.316696 | 111.298523 | 104.254761 | 95.48336   |
| gene-MA16_Dca016705 | 17.677601  | 15.09201   | 17.369297 | 7.703902   | 7.664173   | 7.405929   | 15.954723  | 14.331013  | 15.655791  |
| gene-MA16_Dca012633 | 41.754601  | 37.313236  | 39.22644  | 11.850611  | 10.061936  | 11.931542  | 15.422178  | 14.327641  | 17.232351  |
| gene-MA16_Dca012756 | 1.839656   | 2.70111    | 2.244865  | 0.103441   | 0          | 0          | 0.020793   | 0.026551   | 0.093513   |
| gene-MA16_Dca012759 | 0.088475   | 0.019507   | 0.079577  | 0.037274   | 0          | 0.091831   | 0.862245   | 0.847523   | 0.693048   |
| gene-MA16_Dca018938 | 35.846344  | 26.027943  | 30.20573  | 3.095328   | 4.563255   | 3.846175   | 4.682485   | 5.679995   | 4.865986   |
| gene-MA16_Dca028602 | 3.977803   | 4.005533   | 4.148496  | 2.219503   | 2.578967   | 1.914522   | 1.254119   | 1.621135   | 1.757077   |
| gene-MA16_Dca021215 | 17.88698   | 13.97079   | 12.622798 | 0.115169   | 0.035701   | 0.828554   | 0.470573   | 0.705213   | 0          |
| gene-MA16_Dca021216 | 24.95418   | 29.538343  | 25.773495 | 3.589388   | 3.729708   | 3.020276   | 1.660866   | 2.324072   | 2.217211   |
| gene-MA16_Dca006081 | 43.416859  | 40.753674  | 44.329617 | 5.98975    | 4.274849   | 3.814785   | 6.143955   | 6.41612    | 6.077266   |
| gene-MA16_Dca008269 | 0.29461    | 0.679148   | 0.827099  | 1.125847   | 0.453665   | 0.795161   | 0.25188    | 0.111361   | 0.151951   |
| gene-MA16_Dca006555 | 0.539626   | 0.375025   | 0.545785  | 0.837978   | 0.647031   | 0.636137   | 1.441465   | 2.185937   | 2.111116   |
| gene-MA16_Dca006554 | 31.715059  | 37.753269  | 32.779888 | 17.319237  | 17.562761  | 18.521145  | 10.602677  | 7.44286    | 8.776315   |
| gene-MA16_Dca001024 | 22.579702  | 21.929909  | 22.138327 | 11.345784  | 11.551394  | 11.083961  | 9.686652   | 8.468639   | 10.579689  |
| gene-MA16_Dca013523 | 175.69046  | 170.08667  | 176.62352 | 75.987938  | 70.97879   | 72.494545  | 54.684643  | 49.367443  | 48.906384  |
| gene-MA16_Dca000646 | 27.847723  | 25.412018  | 28.382032 | 16.681326  | 14.790474  | 14.616577  | 10.224199  | 10.332355  | 10.237159  |
| gene-MA16_Dca000641 | 6.9624     | 7.486274   | 7.162707  | 2.790685   | 2.434927   | 2.585579   | 3.489434   | 2.382732   | 3.066468   |
| gene-MA16_Dca013596 | 18.381496  | 18.71694   | 15.369707 | 10.484704  | 9.823689   | 11.499192  | 6.242231   | 7.763161   | 6.510535   |
| gene-MA16_Dca016541 | 0.310108   | 0.325045   | 0.123845  | 0.600711   | 0.485246   | 0.480167   | 1.223674   | 1.21557    | 0.862922   |
| gene-MA16_Dca028197 | 197.579391 | 165.081985 | 205.9095  | 121.690422 | 83.545944  | 111.729431 | 66.207619  | 78.082909  | 68.918678  |
| gene-MA16_Dca012736 | 36.500813  | 34.428204  | 37.622704 | 66.113724  | 68.885986  | 67.477135  | 82.266518  | 84.306351  | 87.927185  |
| gene-MA16_Dca012732 | 62.057423  | 66.81385   | 68.651489 | 120.026398 | 118.291977 | 113.723595 | 264.080872 | 259.06134  | 258.374786 |
| gene-MA16_Dca026330 | 0.699851   | 0.379615   | 0.525629  | 1.042577   | 1.239478   | 1.573759   | 1.172995   | 0.950989   | 0.821175   |
| gene-MA16_Dca023679 | 7.617344   | 7.377472   | 6.856803  | 1.806651   | 2.252504   | 1.724773   | 3.898588   | 3.707273   | 2.774508   |
| gene-MA16_Dca009499 | 1.362021   | 0.988337   | 0.766257  | 1.66664    | 1.443282   | 1.361457   | 2.728446   | 2.516546   | 3.775578   |

|                                   |            |            |            |            |            |            |            |            |            |
|-----------------------------------|------------|------------|------------|------------|------------|------------|------------|------------|------------|
| gene-MA16_Dca022100               | 283.12616  | 287.993805 | 281.352997 | 714.360168 | 641.929626 | 653.968445 | 314.005493 | 318.800507 | 333.165405 |
| gene-MA16_Dca022104               | 66.556526  | 69.989601  | 68.079758  | 162.616516 | 155.55545  | 154.524338 | 20.59086   | 18.519157  | 21.801773  |
| gene-MA16_Dca011819               | 2.074898   | 1.617088   | 2.389464   | 0.986478   | 1.564189   | 1.106832   | 1.239017   | 0.624291   | 0.454015   |
| gene-MA16_Dca025684               | 14.372757  | 15.320045  | 14.251567  | 2.876367   | 1.923765   | 3.934699   | 7.259425   | 6.864341   | 5.462162   |
| gene-MA16_Dca025688               | 18.078028  | 17.362698  | 16.799694  | 0.26536    | 0.062736   | 0.165847   | 0          | 0.272656   | 0.108882   |
| gene-MA16_Dca011815               | 0.453906   | 0.724898   | 0.614001   | 4.454219   | 3.406946   | 4.888716   | 1.588356   | 1.940924   | 1.506055   |
| Dendrobium_catenatum_newGene_2698 | 0.263395   | 0.402568   | 0.12758    | 0.479147   | 0.83443    | 0.492345   | 1.29541    | 0.562878   | 0.795825   |
| gene-MA16_Dca013060               | 1.051619   | 0.879349   | 0.450692   | 1.257883   | 2.337154   | 2.080324   | 1.428586   | 1.344835   | 1.724364   |
| gene-MA16_Dca019600               | 2.751595   | 2.459354   | 2.058489   | 0.688207   | 0.877903   | 1.279745   | 1.014316   | 0.648074   | 1.740285   |
| gene-MA16_Dca019605               | 1.799099   | 2.170932   | 1.843671   | 0.393564   | 0.180617   | 0.863064   | 0.986357   | 0.576276   | 0.175455   |
| gene-MA16_Dca021769               | 11.450897  | 9.774193   | 8.889373   | 11.638506  | 12.850528  | 16.885586  | 30.567362  | 27.412867  | 30.676006  |
| gene-MA16_Dca020415               | 9.440959   | 8.142774   | 8.399698   | 5.33477    | 4.770756   | 5.438354   | 4.033429   | 4.868227   | 3.987011   |
| gene-MA16_Dca023994               | 1.2435     | 1.616144   | 2.609643   | 0.962697   | 0.609884   | 0.888004   | 0.528936   | 0.297268   | 1.324206   |
| gene-MA16_Dca023991               | 0.939617   | 1.111005   | 1.04845    | 1.790785   | 1.949983   | 1.907262   | 2.834352   | 3.046575   | 2.128285   |
| gene-MA16_Dca002301               | 6.034251   | 4.866084   | 4.476252   | 3.115129   | 3.887646   | 2.690087   | 2.449132   | 2.805305   | 2.573811   |
| gene-MA16_Dca017595               | 17.148674  | 19.811836  | 17.961435  | 2.013629   | 1.472257   | 1.936283   | 1.504502   | 0.896511   | 0.859842   |
| gene-MA16_Dca005837               | 16.871752  | 16.271225  | 18.003914  | 34.216129  | 30.663124  | 33.504997  | 44.076408  | 51.003704  | 43.460659  |
| gene-MA16_Dca005836               | 3.633027   | 2.853194   | 3.232489   | 1.084615   | 1.179564   | 0.891328   | 0.974461   | 1.157643   | 1.078037   |
| gene-MA16_Dca021400               | 13.672129  | 13.544176  | 14.217912  | 4.093509   | 7.287108   | 3.619697   | 3.098798   | 5.358202   | 4.920438   |
| gene-MA16_Dca021401               | 432.554657 | 432.455383 | 426.967194 | 760.255493 | 701.682373 | 761.756226 | 1245.05481 | 1201.27942 | 1202.71021 |
| gene-MA16_Dca015017               | 65.959953  | 69.012924  | 60.452435  | 1.071413   | 2.122379   | 1.601251   | 4.58136    | 4.643504   | 3.014157   |
| gene-MA16_Dca018566               | 11.92712   | 11.26083   | 10.777637  | 3.980756   | 5.322628   | 6.840888   | 4.578956   | 4.696503   | 4.899789   |
| gene-MA16_Dca003005               | 13.576363  | 12.886905  | 17.2264    | 14.844312  | 18.521202  | 17.736723  | 36.17728   | 32.373184  | 29.664049  |
| gene-MA16_Dca008437               | 2.324162   | 2.427119   | 2.219723   | 0.931021   | 1.284894   | 1.235074   | 0.915159   | 1.327374   | 1.511197   |
| gene-MA16_Dca003414               | 2.419126   | 2.391014   | 2.876236   | 0.788912   | 0.93895    | 0.751646   | 2.104469   | 2.76085    | 2.252349   |
| gene-MA16_Dca012081               | 11.280355  | 8.793203   | 10.66974   | 3.174076   | 4.31708    | 3.894754   | 4.016693   | 2.62464    | 4.391533   |
| Dendrobium_catenatum_newGene_4814 | 15.279175  | 14.365472  | 15.563971  | 3.693071   | 2.828429   | 3.74319    | 4.629928   | 4.370427   | 5.027854   |
| gene-MA16_Dca000853               | 73.707954  | 74.610703  | 69.360146  | 29.075369  | 32.582008  | 33.16433   | 31.423225  | 31.978825  | 33.339218  |

|                                   |            |            |            |           |           |           |            |           |           |
|-----------------------------------|------------|------------|------------|-----------|-----------|-----------|------------|-----------|-----------|
| gene-MA16_Dca000859               | 0.080844   | 0.126562   | 0.075965   | 0.141219  | 0.313549  | 0.23164   | 0.942877   | 0.595014  | 0.84333   |
| gene-MA16_Dca028782               | 107.228317 | 121.459404 | 111.700302 | 59.154537 | 57.282463 | 56.654579 | 90.661659  | 94.509834 | 94.323792 |
| gene-MA16_Dca028432               | 49.069916  | 56.1133    | 54.157974  | 0.518965  | 0.573254  | 0.350114  | 1.603139   | 1.867395  | 1.556111  |
| gene-MA16_Dca008881               | 1.100973   | 1.100291   | 1.152689   | 2.052029  | 2.074566  | 2.255946  | 1.069229   | 0.963072  | 0.882626  |
| gene-MA16_Dca017752               | 0.703196   | 0.568219   | 1.280749   | 3.053283  | 3.109805  | 2.114176  | 4.311031   | 4.311492  | 4.403704  |
| gene-MA16_Dca022379               | 0.787988   | 1.103249   | 1.836079   | 3.429167  | 3.481614  | 3.15171   | 1.863039   | 1.981922  | 3.664247  |
| gene-MA16_Dca024929               | 25.74773   | 21.501513  | 21.201223  | 25.480522 | 22.8235   | 24.795979 | 8.369024   | 7.890027  | 7.870515  |
| gene-MA16_Dca024926               | 20.997856  | 22.068296  | 24.999084  | 3.520517  | 3.277011  | 3.404941  | 2.632458   | 2.882229  | 1.760611  |
| gene-MA16_Dca011973               | 8.614626   | 9.326377   | 11.113053  | 3.007446  | 2.615183  | 2.787263  | 5.475179   | 5.981509  | 6.204602  |
| gene-MA16_Dca014220               | 119.246437 | 117.255653 | 125.240631 | 73.138329 | 80.90947  | 79.530205 | 65.084854  | 62.438889 | 54.42173  |
| gene-MA16_Dca018760               | 2.939046   | 2.624605   | 2.41085    | 0         | 0.778843  | 0.400279  | 0.570568   | 0.259026  | 0.787744  |
| gene-MA16_Dca020595               | 137.62735  | 140.814728 | 135.59259  | 49.820946 | 48.942631 | 50.22361  | 48.118523  | 47.208111 | 50.49485  |
| gene-MA16_Dca027649               | 22.601     | 23.553459  | 21.65023   | 2.425705  | 2.2459    | 2.626081  | 2.336664   | 2.610746  | 2.205005  |
| Dendrobium_catenatum_newGene_6102 | 1.505964   | 1.179591   | 1.2339     | 2.719763  | 3.723251  | 3.889398  | 3.807192   | 3.133167  | 3.105787  |
| gene-MA16_Dca026998               | 49.24094   | 50.076096  | 51.212166  | 56.577614 | 51.745426 | 59.05254  | 24.911781  | 19.160006 | 18.591291 |
| gene-MA16_Dca026996               | 0.789516   | 1.576593   | 2.10605    | 7.079668  | 3.398671  | 6.272202  | 10.57585   | 10.681898 | 10.222921 |
| gene-MA16_Dca026995               | 7.882354   | 9.279314   | 10.260575  | 16.151775 | 16.401892 | 16.560646 | 101.491196 | 93.235199 | 98.10154  |
| gene-MA16_Dca001279               | 2.486213   | 2.619007   | 2.596589   | 3.623865  | 3.844445  | 3.405607  | 6.60712    | 7.672298  | 6.817839  |
| Dendrobium_catenatum_newGene_9944 | 0.117243   | 0.206139   | 0.192021   | 0.230734  | 0.82525   | 0.41135   | 0.774835   | 0.70125   | 0.806075  |
| gene-MA16_Dca017252               | 1.493397   | 2.453103   | 1.724421   | 3.252628  | 4.632741  | 3.633858  | 6.804303   | 7.144999  | 5.143853  |
| gene-MA16_Dca017256               | 46.522949  | 46.418896  | 41.686359  | 9.486532  | 9.087682  | 9.518305  | 9.007455   | 8.755187  | 8.363094  |
| gene-MA16_Dca009043               | 0.746169   | 0.613781   | 0.414974   | 0.961373  | 0.708324  | 1.28245   | 1.992793   | 4.713508  | 1.744044  |
| gene-MA16_Dca006242               | 60.757122  | 63.701595  | 60.166283  | 31.826218 | 26.776043 | 29.206955 | 49.511803  | 50.157383 | 41.616894 |
| gene-MA16_Dca018845               | 4.914037   | 5.42317    | 4.338019   | 2.110952  | 2.699349  | 1.659283  | 3.134302   | 2.519658  | 2.434696  |
| gene-MA16_Dca001734               | 2.386782   | 3.243402   | 4.428099   | 4.097242  | 4.75992   | 5.07693   | 9.817783   | 5.195798  | 8.883451  |
| gene-MA16_Dca008603               | 4.162632   | 3.611772   | 4.369736   | 10.199544 | 9.660613  | 12.312757 | 15.149525  | 16.479259 | 16.575848 |
| gene-MA16_Dca008608               | 24.022438  | 24.340893  | 28.298782  | 7.043481  | 6.348764  | 7.986384  | 5.340582   | 3.827541  | 4.351541  |
| gene-MA16_Dca012323               | 19.250475  | 21.988054  | 22.048935  | 3.562486  | 2.39437   | 2.796079  | 4.276102   | 3.305166  | 3.515043  |

|                                    |            |            |            |            |            |            |            |            |            |
|------------------------------------|------------|------------|------------|------------|------------|------------|------------|------------|------------|
| gene-MA16_Dca012324                | 3.069645   | 2.11702    | 2.384206   | 0          | 0          | 0.127731   | 0.185878   | 0.740142   | 0.118168   |
| gene-MA16_Dca011789                | 1.768929   | 1.000816   | 0.730178   | 4.850949   | 3.531593   | 3.646431   | 5.880185   | 9.956285   | 6.608152   |
| Dendrobium_catenatum_newGene_10270 | 44.597648  | 42.547748  | 43.093572  | 5.950052   | 4.572826   | 4.487972   | 5.231009   | 5.683674   | 5.217164   |
| gene-MA16_Dca015693                | 186.717453 | 187.354675 | 198.429657 | 103.805145 | 93.861595  | 99.306015  | 101.999374 | 100.707047 | 98.030846  |
| gene-MA16_Dca011430                | 0.233355   | 0.178837   | 0.067118   | 0.509572   | 0.852869   | 0.704767   | 0.782894   | 0.319704   | 1.199314   |
| gene-MA16_Dca011437                | 3.232567   | 2.831972   | 3.607587   | 7.845395   | 7.170053   | 7.675014   | 6.483412   | 6.581145   | 6.210235   |
| gene-MA16_Dca003601                | 30.522472  | 30.417076  | 27.459904  | 18.584295  | 15.475249  | 15.353321  | 15.701795  | 14.747753  | 14.378609  |
| gene-MA16_Dca013492                | 18.073643  | 19.704657  | 18.116001  | 5.220911   | 4.769777   | 4.329494   | 5.241272   | 4.265942   | 6.663382   |
| gene-MA16_Dca013491                | 15.606444  | 17.865971  | 16.708021  | 8.874722   | 7.680909   | 8.136248   | 12.479753  | 10.50851   | 7.73125    |
| gene-MA16_Dca013496                | 12.168482  | 13.775951  | 11.933109  | 1.661323   | 1.29956    | 1.391522   | 4.260672   | 3.597348   | 2.976031   |
| gene-MA16_Dca002555                | 0.407767   | 0.410993   | 0.471239   | 0.241451   | 0.218437   | 0.215714   | 0.227668   | 0.198357   | 0.185904   |
| gene-MA16_Dca013149                | 13.641515  | 13.213708  | 14.281076  | 0.920371   | 0.322863   | 1.355487   | 0.844249   | 0.428914   | 0.291763   |
| gene-MA16_Dca013146                | 40.830502  | 43.817802  | 41.217785  | 4.767673   | 4.99877    | 5.868849   | 6.859934   | 5.53651    | 7.110829   |
| gene-MA16_Dca013140                | 1.099972   | 0.834249   | 1.430427   | 1.975363   | 3.04462    | 3.467623   | 3.353212   | 3.678893   | 2.447962   |
| gene-MA16_Dca013141                | 52.859818  | 54.19548   | 51.705982  | 35.161644  | 32.897484  | 35.429359  | 27.341627  | 25.182295  | 28.701075  |
| gene-MA16_Dca023746                | 1.361628   | 1.812592   | 1.594885   | 0.547582   | 0.46924    | 0.387411   | 0.639661   | 0.711698   | 0.748619   |
| gene-MA16_Dca023743                | 9.836678   | 11.249011  | 10.352073  | 8.530229   | 7.115743   | 5.638126   | 19.435547  | 18.513765  | 17.263187  |
| gene-MA16_Dca009568                | 0.589227   | 0.591905   | 0.538633   | 0.950182   | 1.601273   | 1.46103    | 1.586873   | 1.844836   | 1.23828    |
| gene-MA16_Dca017498                | 28.879576  | 26.930817  | 30.809801  | 5.486957   | 4.499387   | 1.491608   | 4.512545   | 4.950642   | 3.533805   |
| gene-MA16_Dca017499                | 8.540038   | 8.01945    | 7.892347   | 2.056269   | 3.582722   | 1.683431   | 2.202748   | 2.961726   | 1.509879   |
| gene-MA16_Dca019330                | 2.619415   | 2.841008   | 1.775285   | 1.447863   | 1.761234   | 1.373467   | 4.10163    | 3.004365   | 3.932871   |
| gene-MA16_Dca019333                | 74.385719  | 78.012558  | 74.270569  | 124.746178 | 122.591705 | 117.291618 | 172.343658 | 166.450729 | 170.160767 |
| gene-MA16_Dca024719                | 19.545588  | 18.645496  | 19.762434  | 7.004239   | 8.242469   | 7.622202   | 8.875725   | 10.665547  | 9.928963   |
| gene-MA16_Dca024717                | 4.988059   | 4.783084   | 5.158648   | 2.084817   | 2.150122   | 1.915653   | 2.60399    | 1.596516   | 2.117274   |
| gene-MA16_Dca019594                | 1.612078   | 1.327204   | 1.080511   | 0.83556    | 0.206074   | 0.607206   | 0.931297   | 0.280346   | 0.914043   |
| gene-MA16_Dca021299                | 7.541304   | 7.741376   | 7.572738   | 1.476073   | 1.495101   | 0.895916   | 1.370528   | 0.711139   | 0.793953   |
| gene-MA16_Dca023963                | 4.496747   | 5.097569   | 4.121806   | 0.365099   | 0.706541   | 0.545914   | 1.466237   | 1.571771   | 1.696145   |
| gene-MA16_Dca000969                | 0.716609   | 0.207124   | 0.166765   | 0.305039   | 0.244416   | 0.112621   | 1.62894    | 1.209237   | 1.275638   |

|                                    |            |            |           |           |           |           |           |           |           |
|------------------------------------|------------|------------|-----------|-----------|-----------|-----------|-----------|-----------|-----------|
| gene-MA16_Dca027439                | 0.872035   | 1.330942   | 1.387055  | 0.459429  | 0.448709  | 0.312407  | 0.261396  | 0.357456  | 0.361064  |
| gene-MA16_Dca020818                | 77.721642  | 70.340485  | 76.081078 | 13.66848  | 13.660193 | 13.930296 | 20.200676 | 16.613861 | 21.348761 |
| gene-MA16_Dca018334                | 12.690687  | 14.340178  | 11.761597 | 3.557338  | 4.448421  | 4.561255  | 2.815939  | 2.04021   | 3.493901  |
| gene-MA16_Dca006003                | 13.715981  | 15.570245  | 15.138266 | 6.803293  | 7.703155  | 8.729364  | 6.33685   | 6.296913  | 4.746224  |
| gene-MA16_Dca005722                | 21.466736  | 19.959085  | 17.349169 | 11.295634 | 12.607924 | 10.848762 | 7.712151  | 8.264527  | 9.865269  |
| gene-MA16_Dca005857                | 3.264544   | 3.395716   | 3.685109  | 1.529873  | 1.046287  | 1.084783  | 0.498784  | 0.572556  | 0.230466  |
| gene-MA16_Dca003950                | 17.456348  | 17.031326  | 18.121372 | 6.851181  | 5.813931  | 6.35255   | 4.626729  | 5.426896  | 4.484854  |
| gene-MA16_Dca002021                | 3.287295   | 2.45962    | 2.394142  | 2.604592  | 2.91725   | 2.217089  | 5.861323  | 8.118483  | 7.868758  |
| gene-MA16_Dca016119                | 0.456049   | 0.563949   | 0.360201  | 0.995846  | 0.955604  | 0.737124  | 2.157461  | 1.409871  | 1.329158  |
| gene-MA16_Dca024558                | 1.773387   | 1.170722   | 1.653664  | 8.377999  | 6.452819  | 9.601232  | 0.2478    | 1.200974  | 0.334044  |
| Dendrobium_catenatum_newGene_16914 | 47.794075  | 46.219524  | 53.716198 | 7.771771  | 7.771759  | 10.203952 | 8.773293  | 6.938619  | 6.628057  |
| gene-MA16_Dca010087                | 37.179752  | 35.909931  | 41.844753 | 18.874166 | 18.280249 | 16.029884 | 17.742073 | 18.081188 | 19.553238 |
| Dendrobium_catenatum_newGene_14404 | 2.059943   | 2.758655   | 2.369392  | 0         | 0         | 0         | 0         | 0.263924  | 0         |
| gene-MA16_Dca010626                | 28.374426  | 27.8482    | 27.054928 | 21.887135 | 20.371302 | 21.125988 | 57.014198 | 54.356319 | 55.701099 |
| gene-MA16_Dca023730                | 12.540042  | 13.406954  | 13.325459 | 18.87945  | 16.315327 | 21.194736 | 27.383394 | 31.678907 | 28.112989 |
| gene-MA16_Dca023731                | 3.7755     | 2.4934     | 3.008794  | 8.297211  | 10.507377 | 11.875751 | 20.504559 | 20.299417 | 18.565844 |
| gene-MA16_Dca000563                | 4.665293   | 5.265604   | 5.285934  | 2.688835  | 2.005718  | 2.25116   | 2.300952  | 2.672851  | 2.512389  |
| gene-MA16_Dca000560                | 28.01317   | 25.231401  | 26.989922 | 13.827211 | 13.040193 | 13.121932 | 12.754531 | 12.976315 | 12.764253 |
| gene-MA16_Dca016661                | 103.249687 | 101.944946 | 94.001335 | 25.534615 | 26.137634 | 24.177195 | 25.411259 | 23.680735 | 24.107693 |
| gene-MA16_Dca017045                | 5.738208   | 5.556069   | 5.999593  | 1.407997  | 1.521799  | 1.720668  | 1.660225  | 2.234595  | 1.399117  |
| gene-MA16_Dca008487                | 1.846194   | 1.864045   | 1.808912  | 5.596331  | 4.137138  | 5.676678  | 5.204988  | 4.441821  | 4.814641  |
| gene-MA16_Dca022466                | 0.808054   | 1.164912   | 1.150384  | 2.754213  | 3.198802  | 2.620367  | 2.109833  | 1.891693  | 1.894178  |
| gene-MA16_Dca006602                | 74.005318  | 66.124001  | 71.565506 | 17.414942 | 44.907406 | 16.628395 | 21.77153  | 30.360748 | 29.142292 |
| gene-MA16_Dca021481                | 13.206264  | 12.698703  | 11.069509 | 10.701864 | 9.396873  | 9.403752  | 40.101482 | 34.195015 | 33.091061 |
| gene-MA16_Dca021482                | 3.180641   | 1.943713   | 2.340939  | 2.220041  | 1.512732  | 1.826911  | 0.79008   | 0.996502  | 0.332575  |
| gene-MA16_Dca020756                | 71.845314  | 66.797935  | 70.897705 | 31.121508 | 22.887085 | 30.446432 | 36.54607  | 45.699585 | 28.693892 |
| gene-MA16_Dca020755                | 24.476582  | 23.489494  | 22.813761 | 4.717737  | 3.66748   | 4.493362  | 4.948535  | 4.766914  | 4.177467  |
| gene-MA16_Dca020753                | 5.561392   | 5.407404   | 4.905918  | 0.898813  | 0.950589  | 1.6499    | 1.212925  | 0.899164  | 1.18592   |

|                                    |            |            |            |            |           |            |            |            |            |
|------------------------------------|------------|------------|------------|------------|-----------|------------|------------|------------|------------|
| gene-MA16_Dca020752                | 17.436306  | 14.377192  | 18.276283  | 8.214264   | 7.686444  | 7.806939   | 7.512171   | 6.170334   | 6.671571   |
| gene-MA16_Dca020750                | 1.252558   | 1.396801   | 1.481123   | 2.631606   | 3.505702  | 3.269243   | 3.595055   | 3.438941   | 4.224724   |
| gene-MA16_Dca007255                | 32.333546  | 31.653658  | 34.150669  | 14.468893  | 16.291407 | 14.12717   | 16.278629  | 13.944231  | 16.061068  |
| gene-MA16_Dca023006                | 46.549671  | 46.793583  | 42.646557  | 8.86553    | 9.292439  | 7.554417   | 10.047732  | 12.333953  | 11.371001  |
| gene-MA16_Dca001961                | 618.007263 | 572.066711 | 602.510559 | 199.342407 | 195.30751 | 207.475983 | 174.876266 | 177.339828 | 156.069565 |
| gene-MA16_Dca001965                | 8.755512   | 7.657007   | 8.22574    | 15.509728  | 13.176636 | 14.205403  | 22.625032  | 20.129211  | 20.904192  |
| gene-MA16_Dca006614                | 2.079762   | 2.600602   | 2.096035   | 4.327442   | 5.191478  | 5.507735   | 2.973294   | 3.463912   | 2.572125   |
| gene-MA16_Dca001340                | 107.806297 | 114.281181 | 109.584648 | 25.183187  | 26.345078 | 25.411369  | 13.264496  | 12.65976   | 15.296001  |
| Dendrobium_catenatum_newGene_4898  | 9.715736   | 9.262827   | 10.093651  | 1.626672   | 3.076115  | 3.145074   | 3.059035   | 2.275422   | 0.974092   |
| gene-MA16_Dca015291                | 0.349534   | 0.350926   | 0.476108   | 0.815468   | 1.079009  | 1.016798   | 2.221879   | 1.918662   | 2.386021   |
| gene-MA16_Dca003233                | 3.407817   | 6.6057     | 2.293375   | 9.358157   | 10.029029 | 5.933899   | 16.42874   | 12.786035  | 11.138921  |
| gene-MA16_Dca028706                | 12.586219  | 14.06409   | 15.557288  | 4.631042   | 2.532282  | 2.350097   | 2.467517   | 1.429094   | 2.248204   |
| Dendrobium_catenatum_newGene_6239  | 6.575426   | 4.390238   | 7.209244   | 11.241385  | 7.812823  | 8.894777   | 15.366231  | 13.15499   | 14.355589  |
| gene-MA16_Dca008807                | 0.571026   | 1.342833   | 0.575953   | 3.554023   | 2.49229   | 2.467766   | 2.163289   | 2.497217   | 3.772381   |
| gene-MA16_Dca013232                | 3.41106    | 3.937462   | 3.756619   | 2.813403   | 3.542248  | 2.912428   | 1.21378    | 1.374188   | 1.536457   |
| gene-MA16_Dca013236                | 5.243225   | 5.072171   | 3.506537   | 3.308479   | 3.492732  | 2.532314   | 2.233454   | 2.017395   | 2.347362   |
| gene-MA16_Dca013237                | 89.956665  | 87.992233  | 90.97757   | 37.241924  | 33.675255 | 34.966919  | 33.007404  | 28.876001  | 27.58514   |
| gene-MA16_Dca024070                | 1.797044   | 2.199689   | 2.178212   | 1.179088   | 0.831231  | 1.132238   | 0.831782   | 0          | 0.652402   |
| gene-MA16_Dca024071                | 1.97539    | 3.062554   | 3.040575   | 3.951655   | 5.23427   | 4.400774   | 8.053465   | 6.535772   | 8.448073   |
| Dendrobium_catenatum_newGene_11187 | 1.218392   | 1.065304   | 1.335041   | 0.099526   | 0.482381  | 0.29602    | 0.397423   | 0.264644   | 0.327936   |
| gene-MA16_Dca026002                | 25.708506  | 26.247257  | 27.698397  | 12.468369  | 11.226394 | 8.584459   | 18.474121  | 15.053986  | 20.125275  |
| gene-MA16_Dca019759                | 55.686234  | 60.81321   | 55.136463  | 70.722771  | 69.470543 | 70.50119   | 119.002151 | 124.392807 | 121.949364 |
| Dendrobium_catenatum_newGene_1604  | 0.761067   | 1.290182   | 1.480552   | 1.00893    | 1.498403  | 2.131072   | 3.079366   | 3.426141   | 3.704138   |
| Dendrobium_catenatum_newGene_1603  | 2.761573   | 2.285488   | 3.021985   | 3.105285   | 4.783392  | 4.613935   | 9.823048   | 9.163038   | 10.528431  |
| gene-MA16_Dca004932                | 1.472854   | 1.224821   | 1.080383   | 3.456121   | 4.419974  | 3.841321   | 8.349778   | 4.469302   | 8.070464   |
| Dendrobium_catenatum_newGene_7524  | 6.034744   | 5.4581     | 5.926003   | 2.36893    | 1.838     | 1.810777   | 2.272643   | 2.620531   | 2.53292    |
| gene-MA16_Dca006425                | 1.293847   | 1.486873   | 0.969663   | 0.553786   | 0.813779  | 0.43774    | 0.254377   | 0.869802   | 0.592723   |
| gene-MA16_Dca006421                | 103.672089 | 112.553658 | 112.57077  | 6.101269   | 5.028955  | 5.276577   | 4.014305   | 4.201046   | 3.27264    |



|                                    |            |            |            |            |            |            |            |            |            |
|------------------------------------|------------|------------|------------|------------|------------|------------|------------|------------|------------|
| gene-MA16_Dca006428                | 577.211853 | 599.836914 | 562.810303 | 71.796501  | 71.265594  | 69.417587  | 97.50058   | 91.710762  | 96.161514  |
| Dendrobium_catenatum_newGene_15098 | 34.739748  | 38.386284  | 33.739022  | 14.029102  | 9.582793   | 10.014068  | 12.874722  | 11.57009   | 9.473654   |
| gene-MA16_Dca004483                | 26.065937  | 29.402992  | 31.639256  | 6.375833   | 7.707114   | 7.421489   | 17.330568  | 17.64979   | 14.670007  |
| gene-MA16_Dca008681                | 103.701775 | 100.462784 | 95.821869  | 3.955209   | 2.53387    | 2.814332   | 1.048497   | 1.694376   | 0.725295   |
| gene-MA16_Dca008685                | 102.014984 | 100.611473 | 111.255341 | 122.481812 | 127.857903 | 109.667992 | 281.818604 | 231.302582 | 255.592636 |
| gene-MA16_Dca022606                | 11.45614   | 13.720873  | 12.132385  | 16.275084  | 13.803703  | 15.260028  | 29.810017  | 29.737141  | 28.532879  |
| gene-MA16_Dca003680                | 44.000328  | 43.354565  | 44.242332  | 15.163366  | 11.720742  | 13.09304   | 11.89403   | 10.524882  | 11.92444   |
| gene-MA16_Dca011709                | 12.92225   | 12.926784  | 12.878722  | 17.159294  | 15.335714  | 15.764896  | 45.278061  | 44.595837  | 45.79932   |
| gene-MA16_Dca011706                | 27.927204  | 25.334551  | 31.169027  | 48.619179  | 48.172676  | 53.490761  | 71.698677  | 82.875603  | 67.745979  |
| gene-MA16_Dca013411                | 5.818428   | 6.865199   | 6.899131   | 11.733448  | 10.016381  | 11.57406   | 13.027611  | 13.711686  | 14.66146   |
| gene-MA16_Dca009658                | 0.833275   | 1.216865   | 0.668665   | 2.240016   | 1.495278   | 1.915861   | 1.954668   | 2.781827   | 2.735026   |
| gene-MA16_Dca016165                | 1.472677   | 0.99682    | 1.727632   | 0.514436   | 0.450491   | 0.791067   | 3.002348   | 1.936655   | 2.396836   |
| Dendrobium_catenatum_newGene_16529 | 0.827355   | 0.462331   | 0.763412   | 1.199779   | 1.376028   | 2.119787   | 0.738748   | 1.530737   | 1.059333   |
| gene-MA16_Dca025915                | 64.071121  | 56.122589  | 57.745361  | 8.403287   | 7.064623   | 6.83695    | 7.678751   | 6.89318    | 7.972718   |
| gene-MA16_Dca017418                | 16.391693  | 17.753166  | 14.883648  | 6.866187   | 5.885159   | 4.126163   | 4.11918    | 4.5711     | 4.222287   |
| gene-MA16_Dca022035                | 6.207791   | 4.409066   | 3.905539   | 1.75035    | 1.726581   | 1.382846   | 0.675742   | 0.595376   | 0.526083   |
| gene-MA16_Dca028710                | 135.615417 | 138.558151 | 136.216599 | 41.170158  | 42.474792  | 39.264805  | 43.915878  | 30.916025  | 41.540733  |
| gene-MA16_Dca019510                | 4.002693   | 3.317993   | 3.451093   | 1.011217   | 1.04261    | 0.886847   | 1.411771   | 0.412267   | 0.478749   |
| gene-MA16_Dca025262                | 12.727157  | 11.995938  | 12.692677  | 25.150866  | 25.33304   | 24.072905  | 28.720512  | 30.529753  | 31.535606  |
| Dendrobium_catenatum_newGene_10039 | 2.006725   | 2.455326   | 1.670177   | 2.005154   | 1.225482   | 1.262299   | 1.126143   | 0.515101   | 0.556333   |
| gene-MA16_Dca010132                | 128.164734 | 124.552841 | 123.466286 | 69.190361  | 64.655678  | 63.996578  | 70.280769  | 63.422131  | 66.842201  |
| gene-MA16_Dca001535                | 36.926453  | 39.887589  | 42.680283  | 12.295716  | 10.711347  | 12.625419  | 11.265434  | 9.306492   | 9.22168    |
| gene-MA16_Dca018361                | 13.437832  | 11.268531  | 12.644709  | 0.404082   | 0.352885   | 0.70303    | 0.11591    | 0          | 0.21447    |
| gene-MA16_Dca004017                | 26.610056  | 23.706209  | 24.304749  | 35.431076  | 39.141087  | 37.059669  | 70.367233  | 64.778603  | 68.403671  |
| gene-MA16_Dca004010                | 10.472411  | 9.390699   | 11.519279  | 5.360954   | 5.170995   | 5.500863   | 5.616339   | 5.055366   | 5.148834   |
| gene-MA16_Dca007091                | 0.348547   | 0.096471   | 0.169838   | 0.664409   | 0.378013   | 0.452143   | 0.763286   | 0.571987   | 0.548725   |
| gene-MA16_Dca007099                | 1.753222   | 1.776203   | 2.106109   | 0.712516   | 1.372739   | 0.65736    | 0.628894   | 1.107428   | 0.732663   |
| gene-MA16_Dca007638                | 98.304047  | 108.523621 | 107.515465 | 23.764084  | 26.081173  | 25.203751  | 26.79632   | 23.44245   | 24.467024  |

|                                    |            |            |            |            |            |            |            |            |            |
|------------------------------------|------------|------------|------------|------------|------------|------------|------------|------------|------------|
| gene-MA16_Dca006325                | 0.654769   | 0.640983   | 0.519765   | 0.172849   | 0.133574   | 0.277885   | 0.652324   | 0.741366   | 0.620116   |
| gene-MA16_Dca006323                | 2.19852    | 2.341585   | 2.721756   | 1.9844     | 1.437174   | 1.917544   | 4.972778   | 3.815412   | 4.05536    |
| gene-MA16_Dca006320                | 481.583557 | 486.277954 | 461.582916 | 209.860657 | 199.490128 | 208.599167 | 198.840591 | 227.219864 | 223.359634 |
| gene-MA16_Dca006321                | 3.027029   | 1.882609   | 2.038492   | 3.698817   | 3.540334   | 3.790357   | 5.178793   | 5.786359   | 5.813104   |
| Dendrobium_catenatum_newGene_124   | 0.564735   | 0.494795   | 0.557874   | 1.016113   | 1.375441   | 1.320752   | 0.878663   | 0.960371   | 1.118275   |
| gene-MA16_Dca008182                | 4.074468   | 4.798277   | 4.664312   | 3.745604   | 3.551168   | 2.92169    | 1.588449   | 1.995573   | 1.953501   |
| gene-MA16_Dca008189                | 6.30666    | 5.625268   | 4.90959    | 9.500414   | 11.477681  | 10.903803  | 15.751886  | 12.106339  | 12.701021  |
| gene-MA16_Dca000078                | 8.07154    | 7.161716   | 4.734348   | 1.683685   | 1.280362   | 2.148335   | 3.110575   | 3.845487   | 3.813244   |
| gene-MA16_Dca008721                | 4.451554   | 4.222323   | 4.562741   | 8.208678   | 9.580788   | 8.837539   | 22.689825  | 21.784616  | 22.676842  |
| gene-MA16_Dca008728                | 52.027145  | 49.141636  | 54.387455  | 27.03274   | 26.482971  | 27.127808  | 28.162262  | 32.710617  | 30.967936  |
| gene-MA16_Dca012246                | 23.807768  | 18.133711  | 20.538687  | 58.229252  | 65.951538  | 65.432579  | 124.632286 | 133.349854 | 111.737503 |
| Dendrobium_catenatum_newGene_10337 | 1.958706   | 1.735944   | 1.586898   | 0.346894   | 0.448996   | 0.299104   | 0.899957   | 0.445783   | 0.454994   |
| gene-MA16_Dca013592                | 16.823477  | 17.213533  | 17.141624  | 7.007859   | 7.168813   | 8.459026   | 6.611669   | 6.351923   | 6.340403   |
| gene-MA16_Dca002694                | 1.647041   | 2.010123   | 1.433733   | 2.888273   | 2.731073   | 3.900915   | 4.214738   | 3.831918   | 4.319565   |
| gene-MA16_Dca009442                | 4.011442   | 3.171645   | 3.108701   | 2.742066   | 2.730525   | 2.201168   | 5.896289   | 6.303842   | 6.579893   |
| gene-MA16_Dca002344                | 46.043842  | 45.214237  | 46.189919  | 30.639954  | 28.164904  | 30.164448  | 20.233545  | 24.017694  | 21.34437   |
| gene-MA16_Dca002346                | 3.36029    | 4.368906   | 4.043497   | 10.813385  | 9.965106   | 9.498718   | 17.15139   | 17.248741  | 18.483404  |
| Dendrobium_catenatum_newGene_12227 | 17.246023  | 14.980519  | 14.731099  | 4.747147   | 4.711686   | 4.09401    | 4.704218   | 5.5149     | 4.863878   |
| gene-MA16_Dca018567                | 28.84709   | 28.88505   | 25.674513  | 9.091374   | 10.586275  | 13.197415  | 9.383427   | 10.531015  | 9.519834   |
| gene-MA16_Dca017628                | 2.187065   | 3.002535   | 2.325094   | 3.122013   | 1.971576   | 1.675979   | 0.858951   | 1.03802    | 0.514762   |
| gene-MA16_Dca017627                | 4.160466   | 2.925686   | 3.276531   | 3.764476   | 3.31944    | 2.369967   | 1.706921   | 1.13406    | 1.458385   |
| gene-MA16_Dca017621                | 1.199253   | 2.308422   | 1.414898   | 0.069087   | 0          | 0.18889    | 0.3074     | 0.208053   | 0          |
| gene-MA16_Dca026450                | 6.327521   | 6.895947   | 6.657297   | 1.782084   | 0.929558   | 1.483164   | 1.084357   | 1.30036    | 1.345298   |
| gene-MA16_Dca021157                | 1.431224   | 1.210812   | 2.31624    | 4.767343   | 4.639595   | 5.397563   | 5.393615   | 6.816071   | 3.821206   |
| Dendrobium_catenatum_newGene_11199 | 0.403505   | 0.590328   | 0.678681   | 1.545561   | 0.907433   | 1.531183   | 2.49241    | 0.963688   | 2.258418   |
| gene-MA16_Dca015736                | 67.856247  | 64.809517  | 67.547165  | 37.325981  | 39.409103  | 40.787144  | 30.425295  | 30.382387  | 26.063845  |
| gene-MA16_Dca001471                | 16.73506   | 16.214964  | 13.187758  | 10.92348   | 12.422376  | 11.489163  | 6.400443   | 6.765849   | 5.566232   |
| gene-MA16_Dca004228                | 83.118088  | 80.786179  | 78.934822  | 35.402615  | 30.64077   | 33.35199   | 53.768749  | 50.817226  | 52.46608   |

|                                   |            |            |            |            |            |            |           |            |            |
|-----------------------------------|------------|------------|------------|------------|------------|------------|-----------|------------|------------|
| gene-MA16_Dca004224               | 154.270447 | 153.012421 | 156.609039 | 81.126419  | 79.591896  | 78.183624  | 94.573288 | 92.280067  | 77.385727  |
| gene-MA16_Dca004226               | 112.782845 | 111.200264 | 113.132759 | 42.275341  | 43.634945  | 45.162083  | 32.629688 | 33.152531  | 32.328602  |
| Dendrobium_catenatum_newGene_9761 | 1.255007   | 0.899171   | 1.000242   | 0.463411   | 0.459658   | 0.232057   | 0.835436  | 0.65836    | 0.553854   |
| gene-MA16_Dca002101               | 37.825451  | 39.717426  | 38.795078  | 24.616282  | 21.167946  | 22.26795   | 19.554285 | 20.53533   | 17.821476  |
| gene-MA16_Dca018747               | 29.132641  | 31.611317  | 32.304749  | 114.401604 | 104.873665 | 114.239433 | 65.823524 | 74.127701  | 71.308174  |
| gene-MA16_Dca009132               | 15.310203  | 16.533525  | 14.475851  | 6.383309   | 7.110242   | 6.490065   | 13.605052 | 12.517573  | 12.443871  |
| gene-MA16_Dca009134               | 0.287161   | 0          | 0          | 1.15367    | 0.839297   | 0.351199   | 3.188499  | 3.110783   | 2.851948   |
| gene-MA16_Dca012855               | 44.275787  | 40.131027  | 42.74062   | 9.545417   | 9.932446   | 9.05361    | 12.667234 | 14.50215   | 13.825112  |
| gene-MA16_Dca009138               | 99.20977   | 85.317154  | 95.493401  | 46.381939  | 51.274483  | 47.334393  | 38.670589 | 36.81068   | 39.221893  |
| gene-MA16_Dca012853               | 33.467949  | 33.099907  | 38.470882  | 17.858593  | 16.598501  | 18.582066  | 27.256453 | 21.559704  | 26.915768  |
| gene-MA16_Dca002815               | 17.313261  | 17.602613  | 17.455133  | 29.24962   | 27.229687  | 28.612415  | 53.848007 | 50.314915  | 50.919224  |
| gene-MA16_Dca002818               | 76.7015    | 78.556496  | 73.40818   | 24.24143   | 23.320814  | 20.797724  | 16.993723 | 18.280317  | 15.972157  |
| gene-MA16_Dca019941               | 58.722038  | 61.581333  | 56.325115  | 28.682852  | 28.703636  | 30.75054   | 29.929474 | 31.589907  | 31.976065  |
| gene-MA16_Dca025327               | 124.802292 | 124.489212 | 128.551727 | 124.300377 | 156.123123 | 144.649506 | 297.58429 | 278.829224 | 275.362549 |
| gene-MA16_Dca010247               | 1.497253   | 1.465963   | 2.432507   | 4.088834   | 3.333304   | 3.42451    | 4.9992    | 5.302083   | 4.406107   |
| gene-MA16_Dca027060               | 194.128647 | 188.292694 | 187.839142 | 82.481903  | 76.266144  | 75.067352  | 72.374405 | 65.400482  | 67.155785  |
| gene-MA16_Dca027061               | 201.116318 | 203.548355 | 193.90799  | 88.035851  | 83.433762  | 91.38047   | 56.905655 | 61.478348  | 67.472107  |
| gene-MA16_Dca017122               | 0.911641   | 1.00932    | 0.591342   | 0.145821   | 0.26652    | 0.173065   | 0.056321  | 0.121975   | 0.156143   |
| gene-MA16_Dca022509               | 8.464237   | 11.104244  | 8.606768   | 15.861105  | 10.838417  | 12.41842   | 0.80803   | 2.046244   | 2.28834    |
| gene-MA16_Dca014474               | 0.204946   | 0.409094   | 0.473356   | 0.690516   | 0.685322   | 0.504026   | 2.850817  | 2.888959   | 4.332316   |
| gene-MA16_Dca022502               | 2.799862   | 2.793388   | 1.839973   | 0.825178   | 0.611433   | 0.825951   | 0.688583  | 1.224659   | 0.645294   |
| gene-MA16_Dca018151               | 0.987773   | 0.680634   | 0.602853   | 0          | 0          | 0          | 0         | 0.18614    | 0.025609   |
| gene-MA16_Dca017787               | 1.314979   | 0.915531   | 0.680944   | 1.44326    | 2.225204   | 1.943911   | 2.823486  | 2.901742   | 3.719125   |
| gene-MA16_Dca018159               | 0.435528   | 0.549062   | 0.594702   | 0.975826   | 0.714616   | 0.683589   | 2.134835  | 1.202508   | 1.050576   |
| gene-MA16_Dca014781               | 25.27211   | 25.211569  | 22.792334  | 8.881583   | 7.442062   | 6.336221   | 9.633058  | 8.977515   | 9.242822   |
| gene-MA16_Dca021058               | 3.713116   | 3.632125   | 4.538158   | 5.863342   | 4.843236   | 5.827784   | 8.379115  | 10.204506  | 10.49543   |
| gene-MA16_Dca015430               | 1.270863   | 1.271878   | 1.374499   | 2.176976   | 2.222199   | 2.641894   | 3.633688  | 2.629844   | 2.712716   |
| gene-MA16_Dca015431               | 4.253742   | 3.42533    | 3.696445   | 7.274945   | 6.57856    | 7.83422    | 9.551747  | 11.701255  | 12.79234   |

|                                   |            |            |            |            |            |            |            |            |            |
|-----------------------------------|------------|------------|------------|------------|------------|------------|------------|------------|------------|
| gene-MA16_Dca009353               | 23.042522  | 18.809269  | 18.972881  | 7.249478   | 8.940759   | 5.260386   | 5.076502   | 8.988096   | 6.246507   |
| gene-MA16_Dca020016               | 6.999515   | 4.711761   | 6.937274   | 2.984555   | 3.172377   | 2.58516    | 4.823391   | 4.996512   | 3.53949    |
| gene-MA16_Dca004405               | 165.265305 | 164.331238 | 162.338196 | 54.807178  | 51.138195  | 51.656391  | 58.574898  | 55.100361  | 57.07058   |
| gene-MA16_Dca004404               | 78.151283  | 80.75164   | 77.448082  | 22.972815  | 24.563974  | 28.323402  | 11.714057  | 8.822197   | 11.093137  |
| gene-MA16_Dca004406               | 84.359924  | 81.89502   | 81.229691  | 40.777958  | 40.378384  | 34.211384  | 18.419653  | 14.432117  | 15.559163  |
| gene-MA16_Dca004401               | 184.723862 | 187.652374 | 201.373306 | 17.225477  | 23.106756  | 17.744856  | 12.500439  | 9.785314   | 9.614083   |
| gene-MA16_Dca008573               | 38.281391  | 29.882673  | 42.66008   | 9.414371   | 21.956459  | 10.468069  | 9.416116   | 14.884788  | 10.839203  |
| gene-MA16_Dca008575               | 69.8265    | 65.756851  | 63.953503  | 35.193832  | 34.144611  | 31.852167  | 38.125679  | 36.503792  | 36.454529  |
| gene-MA16_Dca001151               | 0.770436   | 0.991275   | 0.928991   | 0.255839   | 0.730243   | 0.340305   | 0.097767   | 0.198394   | 0          |
| gene-MA16_Dca004657               | 3.8717     | 5.89029    | 5.997135   | 2.679997   | 2.627434   | 2.788201   | 1.91973    | 2.686881   | 1.811432   |
| gene-MA16_Dca012900               | 160.768402 | 167.153275 | 174.19313  | 126.90786  | 115.263031 | 118.291115 | 84.541153  | 80.696526  | 77.234489  |
| gene-MA16_Dca028170               | 5.582323   | 4.331089   | 5.744275   | 11.656896  | 9.698138   | 11.691899  | 12.821494  | 12.733191  | 11.199642  |
| gene-MA16_Dca028175               | 275.349152 | 275.165649 | 266.645966 | 147.889221 | 141.249023 | 143.429153 | 118.764877 | 104.759216 | 115.995392 |
| gene-MA16_Dca010943               | 10.380017  | 11.71589   | 11.919525  | 25.960361  | 23.307793  | 28.886885  | 13.864779  | 11.883847  | 13.716912  |
| Dendrobium_catenatum_newGene_7801 | 10.553647  | 11.080901  | 11.583448  | 6.009098   | 6.334708   | 5.261421   | 5.749195   | 5.237228   | 6.038399   |
| gene-MA16_Dca007126               | 0.743417   | 1.62015    | 1.322892   | 2.338688   | 2.773489   | 3.536677   | 2.915129   | 2.301717   | 1.868435   |
| gene-MA16_Dca008327               | 9.070103   | 10.313351  | 10.113477  | 30.759068  | 29.743492  | 29.567142  | 50.452293  | 42.736561  | 40.992138  |
| gene-MA16_Dca013998               | 8.506045   | 8.334637   | 9.318428   | 16.940863  | 16.473673  | 16.543058  | 23.375814  | 20.211769  | 21.470785  |
| Dendrobium_catenatum_newGene_3498 | 1.269086   | 0.711655   | 1.171155   | 0.962661   | 0.840837   | 0.977263   | 0.41367    | 0.554931   | 0.136146   |
| gene-MA16_Dca015901               | 3.307017   | 2.629472   | 2.005875   | 2.6003     | 2.532528   | 2.097758   | 6.685507   | 5.365084   | 6.428637   |
| gene-MA16_Dca015906               | 0.735966   | 0.937186   | 0.573739   | 3.223735   | 4.088661   | 3.9524     | 3.765689   | 3.332561   | 3.84653    |
| gene-MA16_Dca027381               | 116.339005 | 134.228439 | 129.188721 | 54.391354  | 41.379055  | 52.924786  | 26.059254  | 25.835705  | 28.010368  |
| gene-MA16_Dca027382               | 128.62735  | 134.670013 | 136.237671 | 67.251747  | 64.397667  | 75.458588  | 71.165489  | 62.129208  | 60.495152  |
| gene-MA16_Dca019011               | 22.452179  | 28.217531  | 24.006489  | 4.959863   | 4.837951   | 4.172052   | 4.580463   | 4.217752   | 4.433481   |
| gene-MA16_Dca015572               | 61.094498  | 51.621471  | 57.083687  | 19.230822  | 19.137215  | 23.595127  | 13.247279  | 12.882863  | 16.599144  |
| gene-MA16_Dca015577               | 10.286148  | 8.87839    | 10.237609  | 0.160089   | 0.09825    | 0.437343   | 0.581496   | 0.078603   | 0.559349   |
| gene-MA16_Dca015576               | 5.876374   | 4.961871   | 5.761222   | 0.094338   | 0.216536   | 0          | 0          | 0.216622   | 0          |
| gene-MA16_Dca015574               | 2.73952    | 4.255828   | 2.066972   | 0.949077   | 1.663241   | 0.439615   | 0.522189   | 0.682978   | 0.437661   |

|                                   |            |            |            |            |            |            |            |            |            |
|-----------------------------------|------------|------------|------------|------------|------------|------------|------------|------------|------------|
| gene-MA16_Dca001256               | 0.100155   | 0.159022   | 0.02489    | 0.228275   | 0.134719   | 0.11588    | 2.197581   | 1.672257   | 1.284417   |
| gene-MA16_Dca005251               | 2.374645   | 2.109602   | 3.078088   | 1.884629   | 1.518792   | 1.257559   | 0.928107   | 1.270621   | 1.100672   |
| gene-MA16_Dca005256               | 0.783487   | 0.561749   | 0.506034   | 1.41171    | 1.044094   | 1.092179   | 1.164191   | 1.618363   | 1.582039   |
| gene-MA16_Dca027544               | 21.752104  | 20.390236  | 20.497969  | 27.955894  | 28.973978  | 28.940739  | 55.918175  | 47.493389  | 56.005257  |
| gene-MA16_Dca010339               | 48.818962  | 45.926914  | 46.235512  | 4.964004   | 5.327466   | 5.885215   | 9.671349   | 8.041576   | 10.648259  |
| Dendrobium_catenatum_newGene_9464 | 4.561819   | 4.066871   | 3.166544   | 0.259521   | 0.683099   | 0.331153   | 0.992177   | 0.741143   | 0.727498   |
| gene-MA16_Dca011068               | 19.944254  | 17.554756  | 20.239071  | 8.904773   | 6.937733   | 7.422277   | 6.86442    | 6.649683   | 6.177563   |
| gene-MA16_Dca011061               | 0.546269   | 0.437612   | 0.472513   | 1.006019   | 0.993365   | 1.085226   | 0.695578   | 1.092029   | 1.451618   |
| gene-MA16_Dca013514               | 0.868756   | 1.331265   | 0.944361   | 0.638322   | 0.270322   | 0.366275   | 0.74439    | 0.675801   | 1.197806   |
| gene-MA16_Dca016598               | 0.17877    | 0.405372   | 0.014817   | 1.753765   | 1.514292   | 1.552117   | 6.151312   | 6.126907   | 5.514235   |
| gene-MA16_Dca016597               | 0.047291   | 0          | 0.188536   | 0.12391    | 0.381423   | 0          | 1.325332   | 1.401843   | 1.483577   |
| gene-MA16_Dca002614               | 236.0168   | 219.788391 | 221.597153 | 113.903473 | 115.940155 | 117.917633 | 101.063148 | 100.883972 | 103.902046 |
| gene-MA16_Dca002619               | 15.354406  | 17.866011  | 19.120419  | 5.048756   | 8.423977   | 5.114792   | 3.621001   | 2.748715   | 2.653534   |
| gene-MA16_Dca016047               | 1.215322   | 2.094376   | 3.29695    | 8.61212    | 7.282031   | 8.835866   | 8.577407   | 9.929128   | 10.197039  |
| gene-MA16_Dca016043               | 0.146986   | 0.223187   | 0.239775   | 0.163127   | 0.202116   | 0.338192   | 0.993484   | 1.010463   | 1.785884   |
| gene-MA16_Dca020990               | 451.114258 | 445.639435 | 428.061707 | 196.970749 | 204.035645 | 201.777634 | 148.890457 | 122.28363  | 160.763    |
| gene-MA16_Dca020992               | 209.298035 | 172.844833 | 247.071777 | 70.148094  | 154.135147 | 74.155014  | 99.453308  | 93.205399  | 106.423637 |
| Dendrobium_catenatum_newGene_2061 | 3.800637   | 3.040684   | 2.951973   | 0.762775   | 0.486533   | 0.718895   | 0.73153    | 0.701233   | 0.528365   |
| gene-MA16_Dca012749               | 7.586142   | 8.933111   | 7.936367   | 17.417343  | 18.960543  | 20.534117  | 24.277445  | 25.91662   | 27.529968  |
| gene-MA16_Dca012745               | 0.701109   | 0.976158   | 1.069728   | 6.259858   | 3.696162   | 3.260313   | 2.314783   | 4.169542   | 4.525181   |
| gene-MA16_Dca011804               | 0.540566   | 0.878837   | 0.709434   | 1.10628    | 0.556117   | 0.838872   | 2.2291     | 2.006674   | 1.883341   |
| Dendrobium_catenatum_newGene_2933 | 3.553375   | 2.911145   | 2.414396   | 4.650664   | 3.960058   | 5.185942   | 6.186038   | 5.919367   | 6.586832   |
| gene-MA16_Dca014352               | 85.53241   | 82.084427  | 85.114265  | 51.481972  | 48.66465   | 51.414898  | 40.612572  | 39.564835  | 39.435314  |
| gene-MA16_Dca014972               | 1.608681   | 1.503259   | 2.681292   | 0.545628   | 0          | 0.398474   | 1.050838   | 0.530404   | 0.305828   |
| gene-MA16_Dca015005               | 0.34075    | 0.696115   | 0.383072   | 2.180112   | 1.267289   | 1.478207   | 3.558214   | 3.681337   | 4.763478   |
| gene-MA16_Dca015057               | 3.495002   | 3.226665   | 1.741977   | 0          | 0          | 0.071927   | 0          | 0.062937   | 0          |
| gene-MA16_Dca015053               | 0.627926   | 0.571124   | 0.515415   | 0.186781   | 0.210237   | 0.155182   | 0.099003   | 0.240563   | 0.186033   |
| gene-MA16_Dca028958               | 76.826843  | 72.495659  | 68.662697  | 76.819656  | 74.879143  | 76.238495  | 182.15152  | 170.77594  | 167.535309 |

|                                   |            |            |            |            |            |            |            |            |            |
|-----------------------------------|------------|------------|------------|------------|------------|------------|------------|------------|------------|
| gene-MA16_Dca027194               | 3.880104   | 2.634894   | 2.774045   | 8.612286   | 8.81782    | 11.49614   | 8.034765   | 6.4087     | 4.601589   |
| gene-MA16_Dca027195               | 2.679822   | 1.662709   | 1.227844   | 4.02202    | 4.369359   | 4.398906   | 4.223558   | 3.386614   | 2.468402   |
| gene-MA16_Dca025846               | 11.265182  | 7.049494   | 11.361902  | 5.055788   | 4.121376   | 4.579413   | 5.197424   | 6.392736   | 7.804476   |
| gene-MA16_Dca017098               | 87.824005  | 94.172134  | 93.407303  | 43.661289  | 42.844376  | 44.086491  | 36.860767  | 32.044437  | 33.19981   |
| gene-MA16_Dca017095               | 10.593604  | 9.31478    | 8.225617   | 10.867311  | 9.922169   | 10.659269  | 23.379513  | 19.472136  | 23.017895  |
| gene-MA16_Dca017542               | 21.231586  | 19.946096  | 19.14674   | 7.1009     | 7.290143   | 6.440936   | 6.66841    | 8.632228   | 8.23482    |
| gene-MA16_Dca017543               | 1003.0368  | 1016.44275 | 976.970886 | 538.608093 | 516.569397 | 539.207825 | 544.117188 | 605.725891 | 594.046509 |
| Dendrobium_catenatum_newGene_8091 | 7.414061   | 7.747968   | 7.077053   | 1.7174     | 1.791924   | 1.578607   | 3.376051   | 3.251531   | 2.439241   |
| gene-MA16_Dca005863               | 47.741188  | 49.578747  | 44.707077  | 15.218952  | 12.350163  | 12.307591  | 22.541794  | 25.090645  | 26.606234  |
| gene-MA16_Dca004802               | 9.51938    | 11.649274  | 9.703609   | 1.316427   | 1.261707   | 0.913555   | 0.902696   | 1.088941   | 1.245925   |
| gene-MA16_Dca019695               | 75.125748  | 82.144943  | 78.112244  | 22.913813  | 18.703072  | 24.307907  | 37.924274  | 42.088741  | 33.441341  |
| gene-MA16_Dca005040               | 15.939898  | 12.715366  | 10.868557  | 38.378773  | 34.291241  | 35.758327  | 69.507286  | 69.061081  | 65.422729  |
| gene-MA16_Dca007766               | 21.143326  | 21.672417  | 22.268068  | 23.926546  | 22.443644  | 23.310469  | 5.768015   | 7.17259    | 7.560472   |
| gene-MA16_Dca000137               | 10.424858  | 10.53436   | 8.826085   | 4.71084    | 5.05667    | 4.50481    | 5.813351   | 6.131012   | 6.813447   |
| Dendrobium_catenatum_newGene_4376 | 0.844625   | 1.022921   | 0.733381   | 1.1714     | 1.161775   | 0.703403   | 2.97926    | 1.839139   | 2.278759   |
| gene-MA16_Dca010278               | 59.847134  | 61.09787   | 65.296745  | 27.301773  | 25.511749  | 28.591875  | 15.378099  | 14.813099  | 16.338175  |
| gene-MA16_Dca008442               | 12.485148  | 12.164553  | 13.456181  | 26.170343  | 26.308952  | 30.901358  | 31.949396  | 33.80769   | 31.330038  |
| gene-MA16_Dca020430               | 2.573076   | 0.891956   | 1.798864   | 4.928467   | 3.852433   | 4.2353     | 2.355215   | 3.201347   | 4.430778   |
| gene-MA16_Dca014563               | 141.263687 | 142.549149 | 149.290054 | 76.536591  | 64.850975  | 73.020454  | 62.848072  | 58.492996  | 57.910126  |
| gene-MA16_Dca003449               | 2.794512   | 5.173249   | 4.744978   | 4.668564   | 4.002518   | 5.012302   | 12.835231  | 13.436044  | 13.914476  |
| gene-MA16_Dca000865               | 16.731035  | 20.279312  | 14.889743  | 11.992491  | 10.802541  | 12.087318  | 4.620027   | 5.143311   | 4.454019   |
| gene-MA16_Dca000864               | 356.171265 | 348.501617 | 342.362946 | 247.039322 | 262.872345 | 246.214203 | 164.526871 | 154.064575 | 164.661743 |
| gene-MA16_Dca002238               | 124.070663 | 135.452652 | 131.111069 | 164.726105 | 154.947403 | 146.387802 | 309.626953 | 268.381958 | 291.693726 |
| gene-MA16_Dca002795               | 9.404089   | 12.458814  | 11.688148  | 5.083238   | 4.437993   | 5.896691   | 2.551259   | 4.217676   | 3.222255   |
| gene-MA16_Dca023186               | 36.83075   | 40.733395  | 35.398613  | 10.398553  | 8.500906   | 7.020401   | 7.810523   | 9.699913   | 9.219337   |
| gene-MA16_Dca000401               | 2.7908     | 2.016249   | 2.03015    | 1.580627   | 0.409684   | 0.828405   | 3.537653   | 1.950311   | 2.507462   |
| gene-MA16_Dca000405               | 0.843893   | 0.555815   | 0.815041   | 1.845458   | 1.566114   | 2.277797   | 0.591056   | 2.208493   | 1.150034   |
| gene-MA16_Dca022589               | 145.217361 | 141.351517 | 140.425049 | 27.186544  | 27.589653  | 28.066252  | 33.936214  | 34.073425  | 32.60733   |

|                                    |            |            |            |            |            |            |            |            |            |
|------------------------------------|------------|------------|------------|------------|------------|------------|------------|------------|------------|
| gene-MA16_Dca017709                | 6.459543   | 8.700085   | 6.394522   | 2.607797   | 2.432484   | 3.23525    | 3.582202   | 4.620924   | 2.961161   |
| gene-MA16_Dca015703                | 294.904053 | 286.355408 | 285.027832 | 38.54425   | 42.342373  | 38.41441   | 55.841919  | 38.589367  | 53.979275  |
| gene-MA16_Dca013286                | 23.454069  | 23.513012  | 24.636414  | 41.958866  | 39.261101  | 42.436211  | 126.137444 | 138.53476  | 138.271469 |
| gene-MA16_Dca013284                | 117.974083 | 108.356491 | 118.699928 | 56.338573  | 56.762089  | 57.762051  | 57.73785   | 58.929653  | 60.792511  |
| gene-MA16_Dca025316                | 21.942736  | 19.887474  | 20.217607  | 8.857619   | 8.417972   | 8.120961   | 10.532875  | 11.189109  | 10.978893  |
| gene-MA16_Dca025317                | 308.246399 | 312.852814 | 304.394409 | 139.356369 | 132.07373  | 138.499207 | 133.442993 | 134.019424 | 134.809769 |
| gene-MA16_Dca021944                | 0.626966   | 0.71829    | 0.929619   | 1.138972   | 1.393423   | 0.532515   | 1.807639   | 2.020572   | 1.172535   |
| gene-MA16_Dca023849                | 2.745899   | 1.664696   | 1.08433    | 6.898629   | 6.642865   | 8.206673   | 8.478719   | 9.174899   | 7.831235   |
| gene-MA16_Dca023840                | 139.059799 | 140.179428 | 137.991226 | 119.749138 | 115.894867 | 124.620651 | 428.308472 | 411.509186 | 412.938751 |
| gene-MA16_Dca001227                | 118.874138 | 116.742554 | 118.899368 | 91.000359  | 87.019707  | 84.778275  | 53.604866  | 51.457413  | 56.490582  |
| gene-MA16_Dca004307                | 5.74527    | 6.965784   | 6.872409   | 0.342681   | 0.436812   | 0.665346   | 0.246722   | 0.613253   | 0.492624   |
| Dendrobium_catenatum_newGene_6681  | 37.829746  | 38.529694  | 34.914265  | 48.703629  | 43.400406  | 47.651005  | 95.365303  | 82.899124  | 93.585884  |
| Dendrobium_catenatum_newGene_9485  | 12.231526  | 13.536803  | 14.969089  | 12.002028  | 14.087263  | 16.47821   | 33.811478  | 35.144196  | 36.254089  |
| gene-MA16_Dca002223                | 14.119205  | 14.736834  | 13.718269  | 6.299318   | 5.886376   | 7.288115   | 5.826647   | 6.009469   | 7.054172   |
| gene-MA16_Dca006212                | 310.219879 | 296.640686 | 305.244446 | 132.368256 | 120.107719 | 128.568192 | 68.977859  | 66.364548  | 73.073189  |
| gene-MA16_Dca024420                | 1.799758   | 1.334687   | 1.07132    | 2.033068   | 1.405993   | 2.025105   | 3.321623   | 3.325652   | 3.750281   |
| gene-MA16_Dca028884                | 29.745787  | 32.870499  | 30.393066  | 14.971201  | 14.830001  | 11.999512  | 20.545748  | 26.334974  | 26.263493  |
| gene-MA16_Dca013918                | 1.636871   | 1.722248   | 2.010994   | 1.833143   | 1.113171   | 2.113604   | 5.964404   | 3.542672   | 3.225649   |
| Dendrobium_catenatum_newGene_10246 | 36.574425  | 32.084288  | 31.602244  | 38.826621  | 38.762864  | 40.092121  | 18.062002  | 19.010426  | 16.301159  |
| Dendrobium_catenatum_newGene_6896  | 4.061347   | 3.883842   | 3.853093   | 2.369073   | 2.546541   | 1.282018   | 1.788756   | 1.02808    | 1.537154   |
| Dendrobium_catenatum_newGene_16379 | 0.764178   | 1.86112    | 1.21318    | 1.906919   | 3.200856   | 2.92389    | 3.652033   | 3.244541   | 3.399273   |
| gene-MA16_Dca027301                | 19.641991  | 23.2948    | 19.666927  | 2.392794   | 2.751824   | 2.213196   | 1.972332   | 2.347625   | 1.9475     |
| gene-MA16_Dca028308                | 32.162987  | 35.389187  | 31.577923  | 20.286301  | 16.624035  | 21.266535  | 17.166704  | 15.754163  | 13.437543  |
| gene-MA16_Dca022742                | 596.371094 | 611.403381 | 576.861816 | 1312.17944 | 1364.44617 | 1315.51428 | 1987.75122 | 1947.46008 | 1967.90503 |
| gene-MA16_Dca007125                | 2.366061   | 2.335663   | 2.168861   | 3.938386   | 5.220748   | 3.809355   | 5.100739   | 5.047513   | 5.228488   |
| Dendrobium_catenatum_newGene_11682 | 0.953857   | 1.699575   | 1.438663   | 3.935946   | 2.796978   | 3.280648   | 5.710799   | 6.07691    | 6.140716   |
| Dendrobium_catenatum_newGene_2406  | 0.474185   | 0.870422   | 0.232152   | 0.65781    | 1.202097   | 1.396468   | 2.408308   | 1.630737   | 1.876001   |
| gene-MA16_Dca019363                | 68.260811  | 67.29509   | 66.696152  | 139.820312 | 152.919327 | 153.874695 | 77.589088  | 78.417793  | 86.383133  |

|                                   |            |            |            |            |            |            |            |            |            |
|-----------------------------------|------------|------------|------------|------------|------------|------------|------------|------------|------------|
| gene-MA16_Dca019364               | 12.525651  | 10.200985  | 9.924722   | 25.609846  | 23.103218  | 26.43153   | 38.681366  | 43.148491  | 37.039639  |
| gene-MA16_Dca019365               | 9.903667   | 12.814281  | 9.061179   | 19.97629   | 22.27104   | 25.235363  | 37.988628  | 46.21048   | 37.166042  |
| gene-MA16_Dca018941               | 2.779143   | 2.796037   | 2.566885   | 1.961569   | 1.919336   | 1.59744    | 3.645815   | 4.404372   | 3.666883   |
| gene-MA16_Dca018943               | 68.760284  | 78.190254  | 73.466248  | 1.658449   | 1.719885   | 1.397096   | 1.536112   | 0.373449   | 1.569707   |
| gene-MA16_Dca018942               | 143.55191  | 157.508484 | 145.596176 | 2.182079   | 2.89739    | 2.598882   | 2.801036   | 3.820906   | 2.954283   |
| gene-MA16_Dca018947               | 112.981575 | 121.860023 | 107.121292 | 46.035286  | 46.10289   | 40.166679  | 29.84202   | 28.72871   | 31.370874  |
| gene-MA16_Dca019095               | 51.015415  | 53.70166   | 51.622761  | 13.422612  | 11.317801  | 11.792838  | 8.158136   | 7.225897   | 7.886953   |
| gene-MA16_Dca019090               | 19.105469  | 17.533686  | 16.998959  | 6.386371   | 5.253304   | 6.010742   | 10.082372  | 16.250113  | 17.558378  |
| gene-MA16_Dca005810               | 51.08984   | 51.329899  | 53.080669  | 28.526728  | 25.697483  | 25.992819  | 27.379236  | 29.449184  | 29.891922  |
| gene-MA16_Dca020110               | 84.121933  | 79.787941  | 86.680405  | 6.180164   | 4.791572   | 4.066184   | 6.826453   | 6.537255   | 7.834598   |
| gene-MA16_Dca020114               | 0.129415   | 0.167395   | 0.208827   | 0.172836   | 0.222705   | 0.385567   | 2.478164   | 2.537017   | 1.47593    |
| gene-MA16_Dca006054               | 3.25876    | 3.113051   | 3.412193   | 5.782629   | 4.033491   | 5.465609   | 9.792004   | 6.775449   | 6.502859   |
| gene-MA16_Dca006055               | 22.155937  | 21.667221  | 22.669924  | 3.469703   | 3.875115   | 2.59682    | 2.757397   | 2.346769   | 1.418651   |
| gene-MA16_Dca001587               | 4.147417   | 5.410965   | 4.313241   | 1.474995   | 1.570264   | 1.175011   | 2.232355   | 2.373419   | 2.124902   |
| gene-MA16_Dca006581               | 13.830433  | 13.563345  | 17.597336  | 0.949396   | 3.056358   | 4.221995   | 5.934007   | 6.480449   | 4.548334   |
| gene-MA16_Dca001058               | 121.196518 | 127.388687 | 110.201607 | 39.656456  | 35.443806  | 42.320557  | 21.706398  | 21.819609  | 21.379713  |
| gene-MA16_Dca005772               | 15.347687  | 15.67303   | 13.818261  | 6.801292   | 8.743234   | 7.90607    | 11.625223  | 14.164516  | 12.793894  |
| gene-MA16_Dca021422               | 56.321716  | 59.214741  | 51.460098  | 18.395948  | 17.417189  | 18.875378  | 19.063139  | 18.609541  | 18.609674  |
| gene-MA16_Dca006879               | 37.685978  | 33.408272  | 32.90736   | 22.249783  | 21.590269  | 23.541334  | 16.16033   | 16.555544  | 14.417001  |
| Dendrobium_catenatum_newGene_5690 | 12.14485   | 10.979035  | 11.351357  | 1.363804   | 1.117402   | 1.27648    | 0.924932   | 0.980901   | 1.393851   |
| gene-MA16_Dca003960               | 2.916697   | 2.418822   | 2.616772   | 2.915501   | 3.786105   | 3.92468    | 7.504369   | 6.323477   | 7.854546   |
| Dendrobium_catenatum_newGene_7695 | 2.002142   | 1.262742   | 1.200728   | 1.354079   | 0.997792   | 1.343918   | 3.461541   | 3.137723   | 2.277337   |
| gene-MA16_Dca013031               | 387.968445 | 401.759674 | 389.361145 | 228.381149 | 221.415497 | 232.915939 | 130.419739 | 119.614105 | 119.584915 |
| gene-MA16_Dca011881               | 13.371692  | 13.593812  | 13.212602  | 3.897443   | 4.705569   | 3.484174   | 5.138651   | 6.251964   | 5.801569   |
| gene-MA16_Dca022179               | 10.315295  | 8.348456   | 10.473944  | 4.502726   | 3.945321   | 4.194118   | 6.62289    | 8.274059   | 6.868904   |
| gene-MA16_Dca025185               | 15.613375  | 14.152206  | 15.625376  | 34.286217  | 31.297159  | 34.833321  | 36.009975  | 32.966846  | 35.274242  |
| gene-MA16_Dca024585               | 5.395671   | 6.529894   | 7.484834   | 14.081185  | 16.328444  | 14.30456   | 21.673643  | 26.078808  | 20.881634  |
| Dendrobium_catenatum_newGene_4643 | 10.523852  | 10.332323  | 10.431364  | 1.50893    | 0.987744   | 1.424423   | 0.505263   | 0.981464   | 0.743228   |



|                     |            |            |            |            |            |            |            |            |            |
|---------------------|------------|------------|------------|------------|------------|------------|------------|------------|------------|
| gene-MA16_Dca012433 | 22.12285   | 23.803293  | 26.246895  | 11.628844  | 10.903928  | 9.847974   | 11.211964  | 10.405299  | 11.271423  |
| gene-MA16_Dca012437 | 5.722546   | 5.000103   | 3.771246   | 2.729433   | 2.92964    | 3.529099   | 1.42157    | 2.435608   | 0.465936   |
| gene-MA16_Dca012436 | 31.867916  | 30.823168  | 26.027737  | 5.457979   | 5.15859    | 5.703093   | 4.389028   | 2.276654   | 3.120405   |
| gene-MA16_Dca003622 | 88.920403  | 82.552544  | 92.371964  | 167.683228 | 161.796371 | 172.746353 | 218.149872 | 193.306    | 197.395142 |
| gene-MA16_Dca011303 | 42.990486  | 37.747025  | 40.62606   | 1.596559   | 1.73708    | 1.406895   | 2.250376   | 1.844494   | 2.832672   |
| gene-MA16_Dca000559 | 58.960167  | 65.278717  | 61.291862  | 9.417553   | 10.46075   | 10.933491  | 13.179098  | 15.419638  | 14.256163  |
| gene-MA16_Dca027110 | 6.869735   | 3.574907   | 5.604419   | 3.37415    | 2.785325   | 3.826768   | 9.273328   | 6.027191   | 11.161321  |
| gene-MA16_Dca012147 | 240.97406  | 241.843323 | 242.501587 | 66.677444  | 80.230904  | 79.661674  | 69.937828  | 71.85392   | 62.36837   |
| gene-MA16_Dca017013 | 8.105238   | 10.31864   | 9.125567   | 1.288033   | 1.389288   | 1.811382   | 0.357723   | 0.75908    | 1.221042   |
| gene-MA16_Dca017015 | 27.140276  | 27.54492   | 25.955265  | 3.501079   | 2.784559   | 4.027685   | 3.61458    | 3.625206   | 5.223953   |
| gene-MA16_Dca023346 | 2.683794   | 3.755485   | 2.777139   | 3.504733   | 3.618244   | 4.513456   | 9.226657   | 9.063379   | 7.270691   |
| gene-MA16_Dca023348 | 11.144642  | 7.376155   | 9.595183   | 3.058092   | 2.07255    | 3.692928   | 2.924834   | 1.200911   | 4.782444   |
| gene-MA16_Dca022436 | 1.951114   | 2.349435   | 2.180985   | 0.910606   | 0.525982   | 0.473353   | 0.748653   | 0.50112    | 1.132916   |
| gene-MA16_Dca014099 | 46.555618  | 42.320248  | 42.283203  | 20.594448  | 18.788185  | 23.13513   | 18.892681  | 18.61161   | 17.522102  |
| gene-MA16_Dca014174 | 0.790552   | 0.644135   | 1.09692    | 1.399988   | 0.983498   | 2.914738   | 4.28725    | 6.461535   | 4.449214   |
| gene-MA16_Dca015327 | 14.537127  | 15.257203  | 12.534272  | 26.011028  | 23.85342   | 28.210459  | 50.059566  | 47.954765  | 49.638023  |
| gene-MA16_Dca021479 | 35.790871  | 36.181469  | 37.895088  | 17.237169  | 17.617935  | 17.594517  | 19.125484  | 18.997845  | 20.556261  |
| gene-MA16_Dca004888 | 0.396739   | 0.536529   | 0.530219   | 1.150078   | 1.377017   | 1.095981   | 0.758915   | 1.223198   | 0.959142   |
| gene-MA16_Dca004880 | 28.159056  | 28.930391  | 31.098476  | 25.180342  | 22.950039  | 24.722954  | 54.696915  | 60.06599   | 61.022938  |
| gene-MA16_Dca004884 | 20.244682  | 19.595457  | 19.616186  | 5.5925     | 6.820524   | 6.505082   | 5.65029    | 6.041613   | 5.676148   |
| gene-MA16_Dca020701 | 1.273255   | 1.002729   | 1.461454   | 1.867199   | 2.475183   | 1.524562   | 4.012625   | 3.453494   | 2.725632   |
| gene-MA16_Dca020702 | 1.122809   | 1.02053    | 0.35522    | 2.768629   | 1.708546   | 2.979809   | 2.179149   | 3.099635   | 2.770489   |
| gene-MA16_Dca000369 | 13.006109  | 14.398863  | 14.481671  | 4.487144   | 2.237535   | 3.26932    | 1.93301    | 1.090088   | 2.699417   |
| gene-MA16_Dca001936 | 0.394592   | 0.197074   | 0.235956   | 0.611582   | 0.692771   | 0.803036   | 1.212495   | 1.387849   | 1.002916   |
| gene-MA16_Dca001939 | 28.825317  | 28.160242  | 29.566423  | 47.633583  | 45.732155  | 48.402534  | 69.441185  | 72.811295  | 67.337112  |
| gene-MA16_Dca006626 | 14.820512  | 16.247541  | 15.409216  | 9.323766   | 9.668796   | 10.616704  | 6.557076   | 5.896208   | 5.393519   |
| gene-MA16_Dca006621 | 173.585999 | 175.312317 | 178.581116 | 319.725616 | 307.508942 | 307.827515 | 516.822998 | 484.834808 | 464.68866  |
| gene-MA16_Dca008371 | 1.131304   | 0.611605   | 1.545492   | 1.613379   | 1.755622   | 2.397154   | 3.603989   | 2.25912    | 4.108048   |

|                                    |            |            |            |            |            |            |            |            |            |
|------------------------------------|------------|------------|------------|------------|------------|------------|------------|------------|------------|
| gene-MA16_Dca008376                | 10.552191  | 10.070479  | 11.6743    | 1.533349   | 1.703518   | 2.233333   | 2.347562   | 3.046925   | 2.761553   |
| gene-MA16_Dca004710                | 14.219271  | 15.101124  | 14.083519  | 10.466098  | 9.807197   | 10.138374  | 6.71639    | 8.415178   | 7.064794   |
| gene-MA16_Dca004714                | 15.828361  | 20.787931  | 15.702157  | 6.179784   | 5.989933   | 6.466317   | 9.249352   | 8.481      | 9.135957   |
| gene-MA16_Dca011142                | 1.766597   | 1.619484   | 1.466993   | 0.112161   | 0.284809   | 0          | 0.219551   | 0          | 0          |
| gene-MA16_Dca000712                | 7.790997   | 8.245078   | 7.375819   | 4.016973   | 3.868672   | 4.592533   | 3.212125   | 2.960062   | 2.723654   |
| gene-MA16_Dca002715                | 36.459621  | 36.35535   | 33.870132  | 3.785872   | 2.865837   | 3.878237   | 2.394835   | 2.887831   | 3.213295   |
| gene-MA16_Dca002711                | 4.833402   | 5.11335    | 4.580255   | 1.418518   | 1.386413   | 1.135834   | 21.204058  | 13.703982  | 13.918554  |
| gene-MA16_Dca026553                | 2.315032   | 2.363953   | 2.762639   | 1.919265   | 2.023543   | 1.985936   | 4.568182   | 4.302849   | 5.348912   |
| gene-MA16_Dca026552                | 0.414954   | 0.372952   | 0.352299   | 0.495858   | 0.31497    | 0.741631   | 0.917931   | 1.205606   | 0.960555   |
| gene-MA16_Dca009188                | 293.190704 | 303.009766 | 285.707123 | 157.809708 | 154.778534 | 154.997177 | 138.638229 | 127.113274 | 134.872223 |
| gene-MA16_Dca014253                | 2.478949   | 2.756528   | 2.312917   | 0.3236     | 0.567622   | 0          | 0.431147   | 1.536956   | 0.796036   |
| gene-MA16_Dca024042                | 55.067253  | 53.107552  | 50.82214   | 24.450638  | 25.306498  | 22.29084   | 25.306644  | 17.807426  | 24.169281  |
| gene-MA16_Dca019312                | 46.436661  | 52.481453  | 49.429302  | 7.402611   | 9.733523   | 8.565105   | 6.200393   | 6.787878   | 5.154133   |
| gene-MA16_Dca007022                | 5.374486   | 5.676403   | 5.022113   | 10.786508  | 10.396531  | 9.986692   | 17.431215  | 16.073614  | 15.567329  |
| gene-MA16_Dca017195                | 16.923332  | 17.338221  | 14.914602  | 9.447532   | 13.8621    | 7.78142    | 32.342957  | 21.454016  | 33.339233  |
| Dendrobium_catenatum_newGene_16717 | 3.78698    | 3.398111   | 3.295817   | 1.100813   | 0.908534   | 1.390387   | 1.800829   | 1.374064   | 1.163977   |
| Dendrobium_catenatum_newGene_838   | 3.235887   | 3.727936   | 6.284857   | 0.657049   | 2.932599   | 1.340869   | 1.183951   | 1.535733   | 1.408576   |
| gene-MA16_Dca017225                | 15.440375  | 13.614257  | 14.47936   | 3.066669   | 3.668371   | 3.168108   | 2.2775     | 1.771887   | 3.211225   |
| gene-MA16_Dca017227                | 286.693268 | 280.798065 | 279.253326 | 128.695511 | 134.393127 | 130.436707 | 26.399809  | 23.352062  | 28.558142  |
| gene-MA16_Dca017226                | 569.204712 | 570.239197 | 549.036499 | 243.785492 | 237.135025 | 231.874557 | 173.618362 | 157.054184 | 158.316986 |
| gene-MA16_Dca014751                | 11.659211  | 11.474957  | 12.342747  | 26.553934  | 24.603573  | 24.886868  | 29.322554  | 26.237574  | 27.842461  |
| Dendrobium_catenatum_newGene_6603  | 0.834069   | 2.076496   | 0.839241   | 2.879559   | 2.833278   | 2.663056   | 2.427713   | 3.762067   | 2.700879   |
| gene-MA16_Dca006297                | 15.871549  | 14.426865  | 14.907193  | 3.901115   | 3.594667   | 1.97888    | 21.246935  | 18.950907  | 20.454847  |
| gene-MA16_Dca006299                | 15.318849  | 15.632651  | 19.21715   | 28.604258  | 27.903137  | 32.278545  | 15.210338  | 11.728922  | 13.552584  |
| gene-MA16_Dca005671                | 25.858927  | 18.597992  | 19.637905  | 2.707162   | 4.036846   | 5.310725   | 3.122942   | 4.064664   | 2.740255   |
| gene-MA16_Dca005673                | 102.186661 | 101.840164 | 99.941422  | 51.171398  | 44.35915   | 52.778088  | 37.691631  | 37.976639  | 37.191319  |
| gene-MA16_Dca005675                | 2.584072   | 3.091894   | 2.57459    | 0.485098   | 0.186922   | 0.711108   | 0.070838   | 0.174718   | 0.696606   |
| gene-MA16_Dca001746                | 7.516424   | 5.915982   | 6.81926    | 0.584298   | 0          | 0          | 0.200993   | 0.161304   | 0.312732   |

|                                   |            |            |            |            |            |            |            |            |            |
|-----------------------------------|------------|------------|------------|------------|------------|------------|------------|------------|------------|
| Dendrobium_catenatum_newGene_4147 | 16.333603  | 14.877012  | 18.192806  | 8.150569   | 6.020488   | 7.269232   | 14.048215  | 12.489934  | 9.625622   |
| gene-MA16_Dca008654               | 5.43043    | 5.837926   | 7.244332   | 2.490291   | 2.86381    | 4.57375    | 2.143005   | 1.446081   | 2.388592   |
| gene-MA16_Dca008650               | 7.374925   | 5.148594   | 5.079777   | 8.148741   | 10.386271  | 11.754857  | 17.787508  | 16.604307  | 17.106533  |
| gene-MA16_Dca008651               | 8.50402    | 7.421285   | 7.51268    | 19.135859  | 21.296791  | 19.928041  | 27.519829  | 20.000147  | 25.025364  |
| gene-MA16_Dca028384               | 6.059481   | 5.407528   | 5.099203   | 14.964396  | 12.42443   | 13.935643  | 7.926609   | 10.032588  | 6.365476   |
| gene-MA16_Dca028383               | 4.284609   | 4.644056   | 1.928467   | 10.421634  | 7.065846   | 9.412271   | 14.6238    | 13.720694  | 14.190303  |
| gene-MA16_Dca009688               | 12.671123  | 13.23269   | 13.24662   | 3.603796   | 4.122577   | 3.351007   | 5.798536   | 5.354609   | 6.132974   |
| gene-MA16_Dca016133               | 0.679019   | 0.746094   | 0.671676   | 1.761949   | 1.7967     | 1.928486   | 3.168128   | 2.547182   | 2.714661   |
| gene-MA16_Dca002504               | 1.872508   | 1.69751    | 1.722737   | 4.250483   | 4.478052   | 4.111605   | 0.933039   | 0.629629   | 0.50162    |
| gene-MA16_Dca002508               | 33.494946  | 32.82983   | 31.144764  | 73.590393  | 66.271301  | 68.464333  | 133.554901 | 138.958008 | 136.36853  |
| gene-MA16_Dca010990               | 49.854259  | 54.32539   | 60.302334  | 21.156185  | 26.268976  | 23.264055  | 22.89802   | 23.554396  | 22.304888  |
| gene-MA16_Dca010994               | 1.799202   | 1.875163   | 0.840763   | 2.1319     | 3.242263   | 3.064625   | 4.672948   | 4.434678   | 3.896993   |
| gene-MA16_Dca003291               | 48.899948  | 51.430534  | 51.774353  | 64.222328  | 66.544983  | 64.528229  | 149.852417 | 154.891403 | 151.238327 |
| gene-MA16_Dca020193               | 1.243222   | 1.607905   | 0.445278   | 6.758716   | 6.8732     | 6.970639   | 8.414783   | 6.682477   | 6.76736    |
| gene-MA16_Dca001508               | 4.742486   | 5.42358    | 5.072283   | 2.267046   | 2.239981   | 2.583659   | 2.303321   | 2.130666   | 3.121894   |
| gene-MA16_Dca007835               | 5.015805   | 3.890224   | 3.42166    | 3.00961    | 2.032529   | 2.506254   | 1.847016   | 0.795465   | 0.517765   |
| gene-MA16_Dca022903               | 57.521767  | 57.36525   | 60.253155  | 10.491085  | 11.548994  | 10.268211  | 15.226973  | 13.02969   | 10.813509  |
| gene-MA16_Dca022908               | 1.972287   | 2.562442   | 3.000201   | 6.76486    | 6.166434   | 4.321972   | 10.368961  | 9.558138   | 10.287991  |
| gene-MA16_Dca004022               | 39.483372  | 37.433239  | 37.187134  | 13.0191    | 11.70476   | 13.925997  | 18.797234  | 16.719692  | 17.170469  |
| Dendrobium_catenatum_newGene_5567 | 46.270516  | 47.356622  | 46.887139  | 29.180322  | 31.129727  | 35.343146  | 18.134115  | 17.496327  | 17.763353  |
| Dendrobium_catenatum_newGene_6031 | 0.610297   | 0.832447   | 0.94913    | 0.05586    | 0.332617   | 0.211791   | 0.169966   | 0          | 0.249534   |
| gene-MA16_Dca009337               | 432.112823 | 432.682709 | 431.98819  | 166.213989 | 158.006409 | 151.501678 | 181.615479 | 169.014862 | 165.40918  |
| gene-MA16_Dca009330               | 2.117699   | 2.507847   | 2.318636   | 1.079006   | 0.808099   | 0.786161   | 1.239374   | 1.496228   | 1.865668   |
| gene-MA16_Dca009331               | 4.071204   | 4.346915   | 3.832574   | 1.302202   | 0.99176    | 1.92303    | 1.749347   | 1.791452   | 1.965689   |
| Dendrobium_catenatum_newGene_2644 | 1.19461    | 1.160322   | 0.983538   | 2.477818   | 2.068367   | 1.348888   | 3.066519   | 3.959955   | 2.885747   |
| gene-MA16_Dca012925               | 338.937561 | 340.763336 | 332.648285 | 127.966248 | 120.375153 | 121.551994 | 132.049759 | 129.198105 | 133.813995 |
| gene-MA16_Dca004519               | 21.485643  | 20.066017  | 24.029675  | 6.627372   | 4.680288   | 5.784935   | 3.785383   | 5.463469   | 7.029032   |
| gene-MA16_Dca009807               | 13.286573  | 13.453061  | 15.382732  | 6.128638   | 4.313015   | 3.839283   | 6.352998   | 4.344868   | 5.667834   |

|                                    |            |            |            |            |            |            |            |            |            |
|------------------------------------|------------|------------|------------|------------|------------|------------|------------|------------|------------|
| gene-MA16_Dca010389                | 190.427155 | 188.850845 | 190.556396 | 103.43541  | 105.581429 | 108.106537 | 99.254578  | 88.955399  | 94.854996  |
| gene-MA16_Dca010381                | 29.91671   | 31.641933  | 28.720318  | 9.577075   | 10.795635  | 10.126866  | 12.675579  | 11.530242  | 12.174536  |
| gene-MA16_Dca011386                | 9.22683    | 8.309007   | 6.58231    | 11.480164  | 13.518578  | 13.830156  | 15.208164  | 20.750076  | 18.814367  |
| gene-MA16_Dca011387                | 4.555918   | 3.870348   | 4.136223   | 7.353966   | 5.885212   | 6.466909   | 15.447841  | 11.953815  | 14.370323  |
| gene-MA16_Dca011521                | 16.605398  | 17.877737  | 17.516624  | 15.204962  | 15.78942   | 15.647523  | 32.167774  | 33.512798  | 29.799114  |
| gene-MA16_Dca011525                | 109.857269 | 115.74826  | 114.875    | 66.982658  | 63.511078  | 74.531677  | 57.832111  | 58.478481  | 56.47913   |
| Dendrobium_catenatum_newGene_10863 | 30.962093  | 30.473103  | 30.107655  | 637.966431 | 645.266785 | 617.107178 | 184.702225 | 193.666199 | 206.992111 |
| gene-MA16_Dca023691                | 2.477328   | 2.842834   | 2.315507   | 1.456902   | 1.826496   | 1.214204   | 0.556409   | 0.76207    | 1.347397   |
| gene-MA16_Dca002334                | 60.560341  | 55.332672  | 54.218975  | 54.610889  | 54.805901  | 55.72961   | 139.706345 | 137.007004 | 141.404892 |
| gene-MA16_Dca018826                | 5.989149   | 5.133986   | 4.272769   | 3.578211   | 4.309851   | 3.086959   | 0.718788   | 1.645262   | 0.988657   |
| gene-MA16_Dca021169                | 76.334763  | 78.827812  | 72.71209   | 122.186722 | 121.177483 | 125.55703  | 180.796539 | 169.632675 | 181.063629 |
| gene-MA16_Dca026399                | 11.256048  | 12.279016  | 10.177967  | 3.280564   | 2.993413   | 3.12797    | 3.395442   | 2.942297   | 3.016623   |
| gene-MA16_Dca007208                | 38.696022  | 37.547348  | 38.30143   | 12.563685  | 11.448672  | 12.926757  | 17.257891  | 16.320759  | 15.013583  |
| gene-MA16_Dca007203                | 25.838308  | 28.776239  | 26.663561  | 9.405437   | 11.27202   | 9.618659   | 20.577143  | 17.261688  | 21.298862  |
| gene-MA16_Dca027781                | 3.187859   | 4.442803   | 3.711377   | 4.970828   | 5.248149   | 5.182779   | 9.635016   | 11.109902  | 11.062448  |
| gene-MA16_Dca020789                | 23.904518  | 25.008566  | 23.691689  | 14.196408  | 11.599953  | 12.69495   | 12.502419  | 12.069514  | 12.980029  |
| Dendrobium_catenatum_newGene_8866  | 5.95702    | 5.183433   | 6.175613   | 6.769627   | 4.108757   | 4.655569   | 14.993974  | 15.076976  | 14.279924  |
| Dendrobium_catenatum_newGene_8864  | 0.718933   | 0.475422   | 0.845867   | 1.50042    | 0.9799     | 0.85016    | 3.168078   | 2.213622   | 2.26751    |
| gene-MA16_Dca027258                | 1.519352   | 1.527159   | 1.040902   | 1.185646   | 1.460606   | 1.373154   | 0.245205   | 0.174345   | 0.728377   |
| gene-MA16_Dca004797                | 20.540874  | 22.052542  | 19.379583  | 18.203794  | 21.202944  | 18.068947  | 11.658072  | 8.896746   | 11.448445  |
| gene-MA16_Dca005544                | 103.175636 | 108.874039 | 113.431564 | 81.864479  | 86.460762  | 88.099007  | 44.350212  | 37.21064   | 34.742123  |
| gene-MA16_Dca005541                | 5.451091   | 6.266978   | 6.867193   | 2.319214   | 4.216627   | 4.149436   | 0.094084   | 0.629933   | 0.655237   |
| gene-MA16_Dca005548                | 1.500324   | 1.103675   | 1.256046   | 0.492389   | 0.577558   | 0.610987   | 0.299375   | 0.399462   | 0.469643   |
| Dendrobium_catenatum_newGene_5796  | 0.340161   | 0.142787   | 0.312992   | 0.284627   | 0.571548   | 0.796888   | 0.629509   | 0.535073   | 0.939518   |
| gene-MA16_Dca009109                | 8.204052   | 7.438858   | 9.164583   | 12.767425  | 10.656412  | 14.231641  | 18.566662  | 19.087027  | 20.377611  |
| gene-MA16_Dca009105                | 12.211847  | 10.810124  | 10.218179  | 22.13866   | 21.398134  | 21.209909  | 51.362804  | 49.701263  | 48.651272  |
| gene-MA16_Dca022637                | 41.218739  | 36.83115   | 33.509521  | 70.066124  | 71.939301  | 78.682785  | 104.656616 | 103.885292 | 102.105263 |
| gene-MA16_Dca022632                | 268.442139 | 270.596619 | 278.492645 | 212.737946 | 210.922516 | 197.697998 | 125.192284 | 131.284119 | 121.258148 |

|                                    |            |            |            |            |            |            |            |            |            |
|------------------------------------|------------|------------|------------|------------|------------|------------|------------|------------|------------|
| gene-MA16_Dca000219                | 7.912042   | 8.321219   | 6.936212   | 6.846827   | 6.954665   | 7.072478   | 16.12532   | 15.163281  | 13.870968  |
| gene-MA16_Dca020547                | 20.064466  | 18.297281  | 19.918449  | 40.229187  | 38.627697  | 39.134834  | 18.308447  | 17.789869  | 20.273083  |
| gene-MA16_Dca016994                | 1.337536   | 1.770778   | 1.342423   | 1.40841    | 0.919413   | 1.005578   | 2.469583   | 2.478738   | 2.573111   |
| gene-MA16_Dca012061                | 1.590216   | 1.617759   | 1.694777   | 1.264367   | 0.833639   | 1.965448   | 3.990613   | 4.24073    | 2.577487   |
| gene-MA16_Dca003741                | 53.766045  | 57.750851  | 56.444141  | 30.499695  | 27.419138  | 27.987007  | 18.846956  | 16.16164   | 17.384344  |
| gene-MA16_Dca003740                | 138.512939 | 125.199348 | 133.066315 | 22.434008  | 19.731934  | 27.567989  | 13.235878  | 8.967422   | 10.654991  |
| gene-MA16_Dca003746                | 620.610718 | 625.69043  | 579.252869 | 137.918289 | 150.192963 | 143.621399 | 267.180664 | 243.373566 | 258.896759 |
| gene-MA16_Dca004616                | 79.231461  | 77.771713  | 83.910797  | 18.01272   | 17.605623  | 17.640583  | 21.254927  | 20.807652  | 22.710535  |
| gene-MA16_Dca023222                | 0.380548   | 0.219152   | 0.905424   | 1.146168   | 0.995805   | 2.584245   | 2.369824   | 1.526944   | 2.060974   |
| gene-MA16_Dca026058                | 1.228872   | 1.624708   | 1.951895   | 2.2877     | 1.77776    | 2.069333   | 3.865813   | 3.901593   | 2.948307   |
| gene-MA16_Dca026059                | 8.309642   | 6.989922   | 7.788571   | 3.266683   | 2.667214   | 0          | 0          | 0          | 0          |
| gene-MA16_Dca018164                | 3.168189   | 2.531288   | 3.093753   | 1.951891   | 1.631802   | 0.331265   | 0.407839   | 0.723401   | 0.335751   |
| gene-MA16_Dca018169                | 0.336216   | 0.347771   | 0.434675   | 0.308358   | 0.499668   | 0.898464   | 1.570533   | 0.94411    | 1.517426   |
| gene-MA16_Dca017806                | 1.441475   | 1.433302   | 1.574114   | 1.629224   | 1.464024   | 1.102548   | 4.702778   | 3.841516   | 3.495003   |
| gene-MA16_Dca017808                | 4.891378   | 5.272705   | 6.734042   | 1.407882   | 1.661679   | 2.18309    | 1.16336    | 1.048175   | 0.943145   |
| gene-MA16_Dca003355                | 61.064053  | 60.088791  | 60.913208  | 24.266935  | 23.335629  | 24.812113  | 25.593554  | 25.603508  | 25.096245  |
| gene-MA16_Dca018787                | 150.052353 | 156.670364 | 154.798203 | 48.947021  | 46.995823  | 49.557449  | 52.10648   | 56.539761  | 58.982021  |
| gene-MA16_Dca015405                | 3.839278   | 3.121476   | 4.052415   | 5.629965   | 4.525554   | 4.184025   | 10.806495  | 9.286105   | 9.001454   |
| gene-MA16_Dca004964                | 50.773663  | 51.493435  | 49.363598  | 56.16877   | 55.756168  | 56.627529  | 29.099131  | 27.303028  | 26.323673  |
| gene-MA16_Dca016536                | 23.148073  | 19.985199  | 19.998859  | 14.069573  | 16.1017    | 16.697752  | 9.051404   | 9.883083   | 11.256674  |
| gene-MA16_Dca008522                | 13.52972   | 15.134271  | 16.658674  | 7.827836   | 7.059492   | 6.903425   | 7.398486   | 7.387132   | 7.704072   |
| gene-MA16_Dca008524                | 39.11869   | 36.723831  | 35.881069  | 16.872536  | 15.30174   | 20.328753  | 9.157904   | 8.182835   | 9.066184   |
| gene-MA16_Dca004187                | 250.582565 | 254.501175 | 235.219772 | 75.019577  | 74.477516  | 71.026268  | 55.440559  | 53.287956  | 53.590008  |
| Dendrobium_catenatum_newGene_3943  | 32.395264  | 29.546268  | 27.715122  | 1.990839   | 3.032319   | 3.669182   | 7.195136   | 6.347939   | 7.077488   |
| Dendrobium_catenatum_newGene_14793 | 3.302599   | 3.617644   | 3.156417   | 0.889095   | 1.158593   | 1.158985   | 1.227928   | 0.900504   | 1.509427   |
| gene-MA16_Dca005155                | 10.680533  | 11.294213  | 11.252257  | 10.997765  | 10.053684  | 10.889407  | 23.11101   | 22.822931  | 23.550709  |
| gene-MA16_Dca011775                | 11.861973  | 12.372693  | 13.664019  | 10.479477  | 11.045069  | 10.384862  | 20.397272  | 23.13929   | 24.108261  |
| Dendrobium_catenatum_newGene_11484 | 0.395311   | 0.280517   | 0.282251   | 0.798968   | 0.89139    | 0.606646   | 0.706183   | 0.858433   | 0.828172   |

|                                    |            |            |            |            |            |            |            |            |            |
|------------------------------------|------------|------------|------------|------------|------------|------------|------------|------------|------------|
| gene-MA16_Dca000984                | 12.046616  | 10.69225   | 10.758364  | 21.680738  | 19.648659  | 24.889448  | 30.340487  | 31.446791  | 28.83564   |
| gene-MA16_Dca002587                | 2.945536   | 2.435468   | 1.529521   | 0.961722   | 1.134786   | 0.954629   | 1.805184   | 1.732971   | 2.822596   |
| gene-MA16_Dca002585                | 8.888309   | 9.555296   | 11.315583  | 3.118347   | 2.946065   | 3.695901   | 2.976061   | 2.140225   | 3.329809   |
| gene-MA16_Dca002581                | 6.22499    | 5.873556   | 6.4408     | 2.856209   | 3.555371   | 2.426485   | 2.451419   | 2.257113   | 2.679686   |
| gene-MA16_Dca003182                | 6.938139   | 8.405904   | 8.297551   | 17.822403  | 18.513823  | 21.741367  | 21.545555  | 23.547281  | 21.062712  |
| gene-MA16_Dca016207                | 1.662644   | 0.96543    | 3.329652   | 5.040628   | 6.490105   | 3.017782   | 6.121908   | 4.587061   | 4.674232   |
| gene-MA16_Dca010914                | 4.803226   | 4.938495   | 4.865351   | 1.83872    | 1.947117   | 2.032127   | 1.406345   | 1.808136   | 1.561928   |
| gene-MA16_Dca023022                | 52.605427  | 50.777657  | 47.222347  | 3.184928   | 3.143779   | 3.723632   | 7.711958   | 5.183814   | 4.660544   |
| gene-MA16_Dca023023                | 9.773648   | 9.98713    | 8.764405   | 4.709415   | 4.958795   | 4.964248   | 5.226629   | 6.021498   | 6.431976   |
| gene-MA16_Dca023028                | 4.381997   | 3.482604   | 3.994059   | 4.232654   | 3.492991   | 3.640601   | 2.145246   | 1.812296   | 1.293157   |
| gene-MA16_Dca026212                | 4.402304   | 5.080158   | 4.759422   | 1.196963   | 0.841933   | 0.948463   | 1.463587   | 1.30083    | 2.219161   |
| gene-MA16_Dca008950                | 281.048279 | 269.521973 | 274.793976 | 141.662766 | 139.197144 | 144.123276 | 127.889679 | 137.011124 | 132.143066 |
| gene-MA16_Dca008956                | 9.482811   | 8.778006   | 7.347914   | 1.123171   | 1.129743   | 1.543948   | 2.266826   | 1.421035   | 1.745289   |
| Dendrobium_catenatum_newGene_11021 | 6.073044   | 4.571774   | 5.28524    | 2.366449   | 3.041282   | 3.000591   | 1.769427   | 2.160444   | 2.679625   |
| gene-MA16_Dca025741                | 9.316852   | 8.06892    | 8.074454   | 8.787478   | 8.968742   | 9.293312   | 28.361908  | 31.327738  | 29.668642  |
| gene-MA16_Dca025746                | 3.083632   | 4.949822   | 3.015355   | 0.247228   | 0.402666   | 1.093253   | 1.288863   | 1.06367    | 1.511811   |
| Dendrobium_catenatum_newGene_3201  | 829.854919 | 838.771545 | 844.60321  | 992.714111 | 1004.13519 | 967.035095 | 486.996155 | 465.26767  | 504.26358  |
| Dendrobium_catenatum_newGene_475   | 1.191868   | 1.176204   | 0.902768   | 0.098199   | 0          | 0          | 0          | 0          | 0          |
| Dendrobium_catenatum_newGene_14961 | 220.850342 | 215.350052 | 224.248428 | 66.137932  | 61.046825  | 65.005074  | 39.098591  | 43.076622  | 46.776985  |
| gene-MA16_Dca021535                | 5.002735   | 4.94929    | 4.383398   | 3.060972   | 1.897743   | 2.480854   | 2.023452   | 2.473203   | 2.292157   |
| gene-MA16_Dca021537                | 2.309029   | 0.768087   | 1.602207   | 2.770319   | 2.451308   | 4.91828    | 8.061434   | 5.901987   | 6.437728   |
| gene-MA16_Dca021538                | 0.533144   | 0.652215   | 0.633252   | 1.360695   | 2.902395   | 4.299426   | 3.87544    | 4.419109   | 3.890347   |
| Dendrobium_catenatum_newGene_13538 | 0.904537   | 1.025539   | 0.867832   | 0.691025   | 1.256346   | 2.034703   | 2.054552   | 2.319239   | 2.044779   |
| gene-MA16_Dca020665                | 20.396469  | 18.781202  | 20.599724  | 1.665408   | 1.534353   | 1.449877   | 1.660126   | 1.985483   | 2.731348   |
| gene-MA16_Dca015937                | 8.105843   | 9.14963    | 8.648251   | 4.881007   | 3.966209   | 4.781065   | 3.642508   | 4.098711   | 3.504838   |
| gene-MA16_Dca026619                | 15.009439  | 15.074396  | 16.428493  | 54.413204  | 55.332443  | 54.000141  | 81.387177  | 65.675522  | 68.485168  |
| gene-MA16_Dca022981                | 37.999928  | 31.575642  | 36.006073  | 0.659113   | 0.401759   | 0.507419   | 0.172043   | 0.21976    | 0.159438   |
| gene-MA16_Dca026157                | 25.01539   | 25.028999  | 28.571533  | 36.316647  | 36.289417  | 36.887951  | 16.589848  | 17.061071  | 16.135218  |

|                                  |            |            |            |           |           |           |           |           |           |
|----------------------------------|------------|------------|------------|-----------|-----------|-----------|-----------|-----------|-----------|
| gene-MA16_Dca026154              | 0.941584   | 1.108424   | 1.231548   | 0.451383  | 0.565415  | 0.396627  | 0.297522  | 0.520883  | 0.647239  |
| gene-MA16_Dca024579              | 22.59943   | 20.798241  | 22.981979  | 36.06654  | 40.024704 | 36.056789 | 54.559601 | 52.511566 | 55.831367 |
| gene-MA16_Dca018080              | 1.986906   | 2.200182   | 2.159846   | 2.117126  | 2.006044  | 1.932376  | 6.490628  | 5.355561  | 5.949818  |
| gene-MA16_Dca018083              | 9.175997   | 8.879493   | 8.925755   | 18.971003 | 16.702528 | 16.702681 | 99.987808 | 96.470261 | 99.787262 |
| gene-MA16_Dca017307              | 1.422802   | 0.963986   | 1.533787   | 4.157722  | 3.158812  | 3.60165   | 4.102633  | 5.685795  | 4.10014   |
| gene-MA16_Dca017305              | 147.859299 | 144.685669 | 150.835144 | 22.663399 | 24.873886 | 23.708832 | 12.679414 | 11.86449  | 16.611624 |
| gene-MA16_Dca017300              | 50.867798  | 45.747898  | 48.417606  | 12.73991  | 12.039453 | 12.208951 | 11.49737  | 12.235677 | 13.148554 |
| gene-MA16_Dca008161              | 1.482421   | 2.749224   | 2.036666   | 1.506406  | 1.231917  | 1.889972  | 0.812955  | 1.169441  | 0.45129   |
| gene-MA16_Dca019762              | 2.097382   | 2.838408   | 1.905725   | 1.003785  | 2.033949  | 0.900018  | 1.255179  | 1.027328  | 1.105162  |
| gene-MA16_Dca019760              | 1.394213   | 2.360732   | 1.726904   | 1.550098  | 1.204175  | 1.415071  | 0.384242  | 0.557396  | 0.391648  |
| gene-MA16_Dca014651              | 1.250719   | 1.26843    | 1.0523     | 2.530801  | 2.635226  | 4.469376  | 2.397466  | 3.014045  | 2.989717  |
| gene-MA16_Dca014650              | 4.188948   | 5.235054   | 6.196794   | 2.934768  | 2.014876  | 2.378103  | 2.219059  | 2.341089  | 4.168008  |
| gene-MA16_Dca005916              | 37.649014  | 32.721233  | 37.739681  | 17.98061  | 15.787836 | 22.918228 | 19.227972 | 13.436557 | 15.204742 |
| Dendrobium_catenatum_newGene_138 | 1.881761   | 2.26905    | 2.276436   | 2.925819  | 3.44457   | 3.443661  | 5.211136  | 4.8324    | 5.094697  |
| gene-MA16_Dca000681              | 17.925648  | 16.452829  | 20.406046  | 4.696566  | 3.480621  | 3.856394  | 6.00957   | 6.083995  | 5.791876  |
| gene-MA16_Dca006394              | 4.538867   | 3.379072   | 3.350135   | 0.538741  | 0.334131  | 0.42184   | 1.249118  | 0.729447  | 0.291593  |
| gene-MA16_Dca007660              | 34.012054  | 34.305973  | 37.284004  | 53.042675 | 50.326981 | 51.872452 | 80.090454 | 84.83847  | 78.676003 |
| gene-MA16_Dca005136              | 0.258136   | 0.59077    | 0.543223   | 0.894766  | 1.023228  | 0.988758  | 6.053782  | 3.882831  | 6.334968  |
| gene-MA16_Dca005131              | 51.269169  | 46.435955  | 44.565361  | 21.398746 | 18.276859 | 20.235598 | 23.16415  | 20.915171 | 18.97677  |
| gene-MA16_Dca005139              | 1.496919   | 1.25425    | 1.335824   | 0.498699  | 0.715924  | 0.545584  | 0.530728  | 0.7876    | 0.558756  |
| gene-MA16_Dca009280              | 7.268161   | 4.973699   | 7.11188    | 2.206421  | 2.903573  | 4.361229  | 3.117995  | 2.246644  | 2.027409  |
| gene-MA16_Dca008284              | 15.113798  | 15.477816  | 15.63948   | 23.000114 | 21.284367 | 22.67597  | 42.563789 | 39.027668 | 39.70882  |
| gene-MA16_Dca008283              | 1.825881   | 3.298188   | 2.451619   | 0.116216  | 0.15895   | 0.212385  | 0.283559  | 0.529176  | 0.344601  |
| gene-MA16_Dca004669              | 23.15634   | 21.108879  | 21.727648  | 2.307461  | 2.852893  | 2.767866  | 0.331215  | 1.11758   | 0.73052   |
| gene-MA16_Dca012234              | 2.153598   | 2.253254   | 1.956193   | 4.622749  | 4.778148  | 5.450381  | 4.76728   | 4.230462  | 5.024086  |
| gene-MA16_Dca003575              | 1.778419   | 2.143231   | 1.920072   | 8.353892  | 7.897436  | 8.440053  | 19.084394 | 19.479528 | 22.592333 |
| gene-MA16_Dca003571              | 0.981816   | 1.270934   | 0.746792   | 1.671485  | 1.197552  | 1.450743  | 2.035358  | 1.876513  | 2.765464  |
| gene-MA16_Dca003573              | 39.865841  | 41.702011  | 40.855026  | 18.221605 | 17.616261 | 19.381498 | 21.993155 | 22.098017 | 24.586714 |

|                                   |            |            |            |            |            |            |            |            |            |
|-----------------------------------|------------|------------|------------|------------|------------|------------|------------|------------|------------|
| gene-MA16_Dca002623               | 775.769226 | 771.407654 | 766.891357 | 428.198334 | 416.689301 | 434.531311 | 392.531097 | 386.379608 | 389.469421 |
| gene-MA16_Dca002620               | 53.648602  | 53.124039  | 65.540665  | 44.288387  | 39.568016  | 44.103062  | 10.04115   | 9.145689   | 4.427837   |
| gene-MA16_Dca010899               | 9.589836   | 8.715882   | 8.968646   | 17.977455  | 19.838943  | 19.790939  | 24.614115  | 23.78463   | 26.496687  |
| gene-MA16_Dca010898               | 7.560781   | 7.144409   | 7.964794   | 4.635469   | 6.096267   | 4.888837   | 5.123167   | 2.809116   | 3.171344   |
| gene-MA16_Dca026395               | 59.051216  | 55.526104  | 54.899601  | 58.560089  | 55.320946  | 58.183849  | 27.879107  | 27.14797   | 29.468653  |
| gene-MA16_Dca012791               | 8.616237   | 6.430765   | 7.664006   | 0.279048   | 0          | 0.304419   | 0          | 0.19708    | 0          |
| gene-MA16_Dca017670               | 21.595058  | 21.23909   | 20.433939  | 29.615858  | 33.870739  | 30.544748  | 54.618168  | 49.588749  | 50.565937  |
| gene-MA16_Dca018537               | 83.298851  | 78.578568  | 82.609642  | 17.00823   | 16.423435  | 17.322107  | 15.226475  | 12.88718   | 13.989239  |
| gene-MA16_Dca011852               | 12.374143  | 12.789123  | 14.322949  | 7.052669   | 7.032789   | 8.323626   | 6.336197   | 7.0222     | 6.938247   |
| gene-MA16_Dca011855               | 1.921307   | 2.235408   | 2.571312   | 1.166036   | 0.948264   | 2.079358   | 3.025913   | 3.454296   | 4.003262   |
| gene-MA16_Dca019667               | 3.566111   | 3.314985   | 4.012875   | 0.253229   | 0.343725   | 0.876655   | 0.763141   | 0.198514   | 0.61675    |
| gene-MA16_Dca025159               | 2.772727   | 3.812344   | 2.819765   | 5.493402   | 5.859095   | 4.892287   | 7.190294   | 8.112615   | 6.904747   |
| gene-MA16_Dca025157               | 5.456297   | 2.183348   | 4.457909   | 7.851939   | 7.929654   | 5.621337   | 11.472206  | 10.152778  | 7.586535   |
| gene-MA16_Dca025154               | 21.572598  | 20.134426  | 21.554804  | 46.4967    | 44.85202   | 48.063015  | 48.096428  | 46.124767  | 47.532299  |
| gene-MA16_Dca021703               | 6.123733   | 8.623918   | 6.237612   | 1.233179   | 1.502605   | 1.517042   | 13.995212  | 14.141547  | 15.066009  |
| gene-MA16_Dca020252               | 10.242846  | 10.420179  | 7.693636   | 14.208023  | 13.156881  | 13.569602  | 34.609985  | 32.175949  | 29.771364  |
| gene-MA16_Dca001422               | 0.785553   | 0.624005   | 0.624993   | 0.159336   | 0.310474   | 0.338336   | 0          | 0.095757   | 0.12635    |
| gene-MA16_Dca001398               | 17.303577  | 16.950123  | 19.958443  | 3.255892   | 5.523467   | 4.75195    | 4.985157   | 4.279757   | 2.371542   |
| Dendrobium_catenatum_newGene_9883 | 6.6036     | 6.903018   | 6.880022   | 13.418241  | 14.433291  | 10.798316  | 16.340445  | 14.334111  | 15.00515   |
| gene-MA16_Dca020473               | 5.434124   | 4.794911   | 4.248579   | 11.354893  | 11.233905  | 9.00861    | 13.474135  | 15.495529  | 14.000585  |
| gene-MA16_Dca025835               | 53.777298  | 53.956879  | 52.68248   | 26.068182  | 27.131521  | 25.824354  | 22.211891  | 24.987337  | 23.379013  |
| gene-MA16_Dca025831               | 5.483449   | 7.727384   | 6.539508   | 6.606318   | 4.497915   | 5.193154   | 1.707111   | 2.796938   | 2.507169   |
| gene-MA16_Dca017533               | 1.440617   | 1.34686    | 1.339276   | 2.786288   | 3.075224   | 3.41313    | 4.191152   | 4.908551   | 5.002286   |
| gene-MA16_Dca017538               | 52.721638  | 50.872593  | 46.635967  | 19.549225  | 15.055257  | 19.16095   | 18.139734  | 15.457332  | 19.802292  |
| gene-MA16_Dca004278               | 81.722542  | 79.43428   | 79.403473  | 26.965189  | 31.128378  | 28.764345  | 30.490128  | 31.517988  | 28.745462  |
| gene-MA16_Dca004271               | 3.666578   | 5.222767   | 5.718707   | 2.681684   | 2.474647   | 2.195222   | 5.483006   | 4.811867   | 4.101082   |
| gene-MA16_Dca005895               | 23.663664  | 22.224266  | 20.894342  | 11.844321  | 11.358996  | 9.674385   | 8.936672   | 9.664291   | 10.524469  |
| gene-MA16_Dca003802               | 11.808496  | 10.908616  | 11.709813  | 6.113776   | 5.40802    | 6.613733   | 2.864099   | 4.309737   | 3.202031   |



|                                     |            |            |            |           |            |            |            |            |           |
|-------------------------------------|------------|------------|------------|-----------|------------|------------|------------|------------|-----------|
| gene-MA16_Dca012802                 | 49.726414  | 42.722313  | 47.128063  | 12.399408 | 12.595431  | 13.246257  | 11.808582  | 10.407417  | 12.219646 |
| gene-MA16_Dca012803                 | 67.648346  | 63.630859  | 59.004589  | 8.195557  | 9.82945    | 10.897196  | 15.295659  | 14.058647  | 15.744094 |
| gene-MA16_Dca002860                 | 16.001257  | 18.782188  | 19.230379  | 9.501824  | 8.606994   | 13.231204  | 8.602358   | 9.053217   | 8.493037  |
| gene-MA16_Dca001987                 | 16.615316  | 19.002436  | 17.983124  | 42.983913 | 37.956192  | 43.914375  | 45.431759  | 49.414265  | 45.120472 |
| gene-MA16_Dca000292                 | 0.376012   | 0.695453   | 0.806149   | 0.505286  | 0.571622   | 0.57236    | 2.43259    | 2.631491   | 1.974286  |
| gene-MA16_Dca011640                 | 102.539597 | 99.49929   | 96.500511  | 37.968014 | 40.484161  | 39.44014   | 43.59824   | 39.676754  | 42.714462 |
| gene-MA16_Dca011643                 | 0.26468    | 0.417448   | 0.264232   | 0.564739  | 0.359465   | 0.175339   | 1.595684   | 1.074156   | 1.482917  |
| gene-MA16_Dca016917                 | 5.549993   | 3.772764   | 5.62362    | 6.435235  | 5.822136   | 6.169141   | 11.876484  | 15.565719  | 12.431194 |
| gene-MA16_Dca000833                 | 173.475388 | 184.585327 | 178.096848 | 371.00766 | 374.812897 | 365.622131 | 173.539322 | 173.328201 | 172.23764 |
| gene-MA16_Dca022869                 | 9.922561   | 10.76766   | 14.178671  | 9.443676  | 9.197062   | 10.472768  | 2.444084   | 1.49367    | 1.195828  |
| gene-MA16_Dca022866                 | 4.881352   | 4.560972   | 5.483132   | 0.942648  | 0.91034    | 1.151329   | 1.82798    | 0.799745   | 1.445464  |
| gene-MA16_Dca014425                 | 26.846737  | 26.724049  | 25.110294  | 11.965408 | 9.265494   | 9.540146   | 11.77917   | 12.131122  | 13.263119 |
| Dendrobium_catenumatum_newGene_2248 | 2.153857   | 1.943391   | 2.951354   | 6.089052  | 5.199252   | 4.366461   | 0.844552   | 1.522504   | 2.357197  |
| gene-MA16_Dca025580                 | 36.725067  | 39.491703  | 36.741753  | 10.657248 | 11.43671   | 11.763526  | 5.230668   | 4.741323   | 3.985659  |
| gene-MA16_Dca025582                 | 29.194132  | 25.652794  | 26.210999  | 7.062943  | 7.341247   | 5.79966    | 1.906915   | 3.237309   | 2.137748  |
| gene-MA16_Dca017732                 | 1.781437   | 1.926695   | 1.046863   | 4.521096  | 6.31       | 4.226596   | 10.514519  | 8.830119   | 12.436638 |
| gene-MA16_Dca026580                 | 11.946297  | 7.17407    | 10.147101  | 5.21081   | 8.503821   | 6.622519   | 3.384559   | 2.993426   | 2.506061  |
| gene-MA16_Dca026583                 | 95.386871  | 96.53083   | 94.631012  | 6.694561  | 6.925814   | 5.063516   | 9.982175   | 9.434473   | 9.11797   |
| gene-MA16_Dca026586                 | 30.061285  | 28.431156  | 30.512583  | 12.750278 | 12.09146   | 13.483595  | 8.348612   | 10.218686  | 8.192905  |
| gene-MA16_Dca024988                 | 26.313919  | 24.96212   | 25.166759  | 0.652748  | 0.769044   | 0.473406   | 0.832314   | 1.234253   | 1.064815  |
| gene-MA16_Dca018701                 | 65.631889  | 66.984024  | 64.184792  | 46.956188 | 38.50349   | 42.618168  | 20.38298   | 21.212233  | 18.119148 |
| gene-MA16_Dca018706                 | 27.65461   | 28.555227  | 29.120367  | 6.321605  | 5.176044   | 4.938226   | 9.029126   | 8.645929   | 9.555736  |
| gene-MA16_Dca017884                 | 34.759724  | 31.432516  | 32.558895  | 12.266813 | 14.257248  | 14.038662  | 12.190987  | 11.189388  | 10.09029  |
| gene-MA16_Dca015480                 | 29.492636  | 29.079523  | 28.070547  | 11.000682 | 11.231652  | 11.282557  | 10.203434  | 10.487086  | 11.559724 |
| gene-MA16_Dca023872                 | 2.191588   | 2.352776   | 2.329285   | 0.242583  | 0          | 0.227131   | 0.574347   | 0.455963   | 0.152916  |
| gene-MA16_Dca006745                 | 47.678394  | 50.615242  | 46.968277  | 16.560797 | 19.205782  | 17.854197  | 19.335886  | 15.628779  | 18.448246 |
| gene-MA16_Dca004455                 | 1.520148   | 1.496459   | 1.577271   | 1.387141  | 1.251305   | 0.868043   | 3.34068    | 2.830062   | 3.4738    |
| gene-MA16_Dca007908                 | 114.829315 | 124.446167 | 113.445107 | 56.673923 | 45.055237  | 47.883526  | 41.277222  | 35.050808  | 34.731136 |

|                                   |            |            |            |            |            |            |            |            |            |
|-----------------------------------|------------|------------|------------|------------|------------|------------|------------|------------|------------|
| gene-MA16_Dca007907               | 73.209122  | 70.779602  | 73.775345  | 33.215347  | 33.394207  | 34.185577  | 45.228886  | 48.009422  | 44.467751  |
| gene-MA16_Dca009029               | 17.732328  | 18.895893  | 17.051218  | 10.446021  | 8.371665   | 9.990497   | 9.835567   | 7.950177   | 7.550739   |
| gene-MA16_Dca009022               | 0.328861   | 0.537625   | 0.305003   | 0.608723   | 0.406595   | 0.473897   | 2.735984   | 1.729459   | 1.832688   |
| Dendrobium_catenatum_newGene_7273 | 8.68529    | 5.943724   | 5.776397   | 0.374222   | 0.789803   | 1.628186   | 0          | 0          | 0          |
| gene-MA16_Dca006226               | 62.904308  | 61.165569  | 65.480186  | 147.20726  | 148.976044 | 149.026169 | 232.276627 | 222.756912 | 207.027252 |
| gene-MA16_Dca008048               | 27.115355  | 26.065283  | 27.748772  | 8.135747   | 7.456085   | 7.416761   | 5.516984   | 6.718505   | 5.653889   |
| Dendrobium_catenatum_newGene_4774 | 14.466169  | 13.18437   | 13.419503  | 11.270731  | 10.10604   | 12.934822  | 60.020817  | 56.246582  | 55.371387  |
| Dendrobium_catenatum_newGene_4198 | 0.674328   | 0.66777    | 0.708118   | 0.071284   | 0.200539   | 0.157447   | 0.147147   | 0.127151   | 0.227633   |
| gene-MA16_Dca010727               | 22.294064  | 22.523016  | 21.944571  | 37.570084  | 37.638756  | 34.703735  | 58.817715  | 54.597443  | 57.43515   |
| gene-MA16_Dca000315               | 69.333481  | 62.947418  | 64.027328  | 101.089325 | 94.305374  | 90.688057  | 175.901993 | 160.338882 | 169.717499 |
| gene-MA16_Dca000318               | 1.876339   | 2.035222   | 1.478069   | 3.983938   | 5.344734   | 4.686683   | 4.474294   | 4.884506   | 6.326713   |
| gene-MA16_Dca016893               | 17.521496  | 11.697157  | 11.576379  | 0.258996   | 0.665013   | 0.387142   | 0.06494    | 0.269345   | 0.684256   |
| gene-MA16_Dca012387               | 5.816489   | 6.669765   | 6.087749   | 11.299187  | 10.922129  | 9.983596   | 13.931186  | 13.326282  | 16.897434  |
| gene-MA16_Dca012383               | 0.973262   | 0.945559   | 0.942774   | 0.309349   | 0.603872   | 0.54051    | 0.23807    | 0.370192   | 0.174656   |
| Dendrobium_catenatum_newGene_6849 | 0.720615   | 0.923685   | 0.576969   | 2.048707   | 2.008895   | 2.908053   | 5.121625   | 3.260192   | 5.362806   |
| gene-MA16_Dca023044               | 23.925337  | 26.241669  | 24.379482  | 1.092429   | 0.646706   | 2.091541   | 1.062676   | 0.67846    | 0.652298   |
| gene-MA16_Dca018007               | 13.588823  | 11.068469  | 13.415639  | 12.083447  | 12.08165   | 11.465227  | 6.956115   | 4.295202   | 6.912992   |
| gene-MA16_Dca027828               | 49.967045  | 45.007175  | 41.888012  | 18.325441  | 15.491345  | 18.852451  | 19.272757  | 20.429522  | 17.797857  |
| gene-MA16_Dca018008               | 0.983751   | 1.149871   | 0.728191   | 1.072084   | 1.158153   | 1.089968   | 1.891995   | 3.258769   | 3.880205   |
| gene-MA16_Dca025468               | 5.803803   | 5.985966   | 7.232476   | 1.588065   | 2.498175   | 2.133137   | 2.17       | 1.941171   | 1.488929   |
| gene-MA16_Dca026270               | 9.993881   | 8.911554   | 9.210784   | 4.74985    | 5.234116   | 4.451981   | 4.659154   | 5.086078   | 3.270313   |
| gene-MA16_Dca026271               | 28.214205  | 25.66715   | 30.09549   | 7.467315   | 7.694898   | 9.681581   | 19.153473  | 16.624201  | 17.547844  |
| gene-MA16_Dca007373               | 7.828353   | 6.77442    | 7.344839   | 8.445463   | 9.172306   | 9.219067   | 24.689083  | 19.902998  | 21.726036  |
| gene-MA16_Dca005205               | 333.865631 | 337.604736 | 355.359161 | 405.327728 | 443.105988 | 385.555847 | 754.464844 | 712.511353 | 717.836487 |
| gene-MA16_Dca005201               | 4.994581   | 5.038327   | 4.696178   | 2.626733   | 2.071766   | 1.82932    | 2.158587   | 2.143187   | 2.252259   |
| gene-MA16_Dca005202               | 7.93189    | 7.006021   | 8.038356   | 1.456233   | 0.997255   | 0.418914   | 1.68708    | 1.893201   | 0.967601   |
| gene-MA16_Dca005203               | 5.398587   | 6.793362   | 5.192727   | 8.030278   | 7.438089   | 6.556203   | 15.923985  | 18.370541  | 17.090956  |
| gene-MA16_Dca004559               | 40.924175  | 44.937004  | 40.832088  | 26.562248  | 24.141169  | 25.596663  | 21.420622  | 23.429195  | 18.871725  |

|                                   |           |            |           |            |           |           |           |            |           |
|-----------------------------------|-----------|------------|-----------|------------|-----------|-----------|-----------|------------|-----------|
| gene-MA16_Dca000666               | 1.95294   | 1.236512   | 1.50028   | 2.26848    | 1.770129  | 2.27734   | 0.338793  | 0.677667   | 0.638846  |
| gene-MA16_Dca016567               | 16.170963 | 16.042704  | 14.645557 | 7.568172   | 5.610789  | 4.012467  | 2.736414  | 2.528686   | 3.325399  |
| gene-MA16_Dca016562               | 60.532925 | 61.114227  | 65.767952 | 34.56731   | 34.850548 | 34.442852 | 26.183815 | 23.930889  | 23.311895 |
| gene-MA16_Dca006843               | 0.293437  | 0.249773   | 0.11214   | 0.966231   | 0.895965  | 0.648835  | 0.717031  | 1.214205   | 0.948781  |
| gene-MA16_Dca006848               | 17.374477 | 16.574537  | 16.294481 | 9.224256   | 6.498737  | 8.428246  | 6.888745  | 9.650021   | 7.779385  |
| gene-MA16_Dca026311               | 2.353406  | 3.139899   | 1.938091  | 7.426598   | 7.58729   | 8.487756  | 22.754705 | 21.48448   | 21.373028 |
| gene-MA16_Dca026313               | 1.279395  | 1.615307   | 1.094363  | 0.551443   | 0.14268   | 0.368135  | 1.204965  | 0.670304   | 1.151297  |
| gene-MA16_Dca026314               | 2.200649  | 1.658944   | 2.392901  | 1.840595   | 1.627562  | 1.426123  | 0.932223  | 1.010796   | 1.044195  |
| gene-MA16_Dca022127               | 2.466661  | 1.602232   | 2.829327  | 0.6392     | 0.975168  | 1.212754  | 0.947722  | 0.930315   | 0.680396  |
| Dendrobium_catenatum_newGene_3368 | 7.606443  | 6.565853   | 6.643271  | 5.840981   | 4.775239  | 6.093455  | 32.885269 | 30.25774   | 32.306313 |
| gene-MA16_Dca013042               | 17.101849 | 12.075741  | 14.477558 | 10.592157  | 8.209154  | 9.537145  | 27.872566 | 30.203127  | 32.344887 |
| Dendrobium_catenatum_newGene_3094 | 4.121142  | 5.134743   | 3.69085   | 1.711601   | 2.014982  | 2.117712  | 1.68023   | 1.50034    | 2.888032  |
| gene-MA16_Dca010713               | 29.808897 | 30.632195  | 29.073433 | 2.954369   | 3.772515  | 3.370339  | 1.522762  | 2.632355   | 1.567225  |
| gene-MA16_Dca024205               | 46.509335 | 49.251495  | 49.347343 | 17.493023  | 19.029108 | 17.08046  | 15.267095 | 14.450781  | 16.22654  |
| gene-MA16_Dca010717               | 0.064967  | 0.393134   | 0.267347  | 0.275037   | 0.375072  | 0.593669  | 2.481414  | 1.253879   | 1.665245  |
| gene-MA16_Dca010027               | 0.566818  | 0.394807   | 0.286698  | 1.069445   | 0.883535  | 0.740781  | 0.827878  | 1.299658   | 0.745788  |
| gene-MA16_Dca020612               | 1.415801  | 1.016525   | 1.36912   | 3.355206   | 3.17635   | 3.131027  | 2.608966  | 2.761514   | 2.535553  |
| gene-MA16_Dca020611               | 0.103764  | 0          | 0.026301  | 0.263036   | 0.145171  | 0.343488  | 0.773376  | 0.950696   | 0.830052  |
| gene-MA16_Dca011375               | 34.579147 | 37.341068  | 40.054039 | 20.934172  | 18.756123 | 18.021402 | 13.656475 | 12.684677  | 13.539487 |
| gene-MA16_Dca011372               | 8.962874  | 10.232101  | 8.653861  | 4.493991   | 4.34422   | 5.739322  | 5.2515    | 4.939961   | 5.19798   |
| gene-MA16_Dca017028               | 14.987557 | 15.168075  | 14.570778 | 0.141576   | 0         | 0.360416  | 0.184119  | 0.167861   | 0.343006  |
| gene-MA16_Dca025577               | 164.15329 | 172.054123 | 174.54425 | 100.462791 | 93.701523 | 81.632446 | 63.316864 | 56.331814  | 57.669128 |
| gene-MA16_Dca019149               | 4.412338  | 5.312296   | 5.548419  | 3.330229   | 3.501252  | 2.840692  | 3.279002  | 2.37326    | 2.165489  |
| gene-MA16_Dca019146               | 19.132715 | 20.423435  | 19.86665  | 3.350146   | 3.176776  | 2.520422  | 3.18361   | 4.140141   | 3.651921  |
| Dendrobium_catenatum_newGene_19   | 18.896486 | 18.19546   | 21.3289   | 36.274045  | 41.610347 | 42.955546 | 82.02708  | 100.276351 | 81.75739  |
| Dendrobium_catenatum_newGene_1141 | 4.22686   | 5.016624   | 5.580982  | 2.174515   | 1.964     | 2.658352  | 4.670833  | 4.049426   | 5.116714  |
| Dendrobium_catenatum_newGene_9798 | 3.492942  | 3.346261   | 3.441523  | 0.694141   | 0.654042  | 0.517831  | 0.446231  | 0.736717   | 0.678797  |
| gene-MA16_Dca015312               | 1.989271  | 2.337277   | 2.104013  | 4.991838   | 3.375837  | 4.387923  | 5.804266  | 4.425735   | 4.753594  |

|                                   |            |            |            |            |            |            |            |            |            |
|-----------------------------------|------------|------------|------------|------------|------------|------------|------------|------------|------------|
| gene-MA16_Dca004800               | 33.183052  | 36.042561  | 30.755207  | 11.311796  | 11.398405  | 13.739344  | 10.201384  | 9.215072   | 10.824841  |
| gene-MA16_Dca008413               | 8.990926   | 9.847887   | 9.718213   | 20.267145  | 21.367393  | 20.049978  | 16.92211   | 20.271715  | 17.257992  |
| gene-MA16_Dca010225               | 7.044063   | 9.200704   | 9.810579   | 4.897408   | 3.950996   | 4.711358   | 4.943923   | 4.315865   | 4.26298    |
| gene-MA16_Dca005591               | 12.962083  | 10.721955  | 11.754308  | 5.769672   | 6.253953   | 5.36554    | 8.730793   | 7.10422    | 7.461257   |
| gene-MA16_Dca005593               | 3.533913   | 4.410906   | 3.197783   | 0          | 0          | 0          | 0          | 0          | 0.187286   |
| gene-MA16_Dca005598               | 4.970392   | 3.678752   | 4.593951   | 14.74373   | 11.359752  | 13.571947  | 17.672522  | 16.186235  | 21.478209  |
| gene-MA16_Dca003295               | 0.510582   | 0.302555   | 0.23639    | 0.069587   | 0.19041    | 0.286979   | 1.454333   | 1.065271   | 0.707594   |
| gene-MA16_Dca002744               | 11.549131  | 12.889183  | 9.244763   | 27.167553  | 21.380013  | 25.848949  | 10.883586  | 9.406766   | 9.932479   |
| gene-MA16_Dca023151               | 0.837272   | 1.246063   | 0.968698   | 2.897958   | 2.288024   | 1.973378   | 2.123056   | 2.64456    | 2.620116   |
| gene-MA16_Dca028456               | 1.910865   | 2.009453   | 1.563267   | 0.248613   | 0.760146   | 0.654626   | 0.228075   | 0.525619   | 0.56046    |
| Dendrobium_catenatum_newGene_7747 | 0.638412   | 0.646992   | 0.953575   | 1.249997   | 1.490173   | 0.767886   | 2.022786   | 2.192557   | 1.222815   |
| gene-MA16_Dca022684               | 393.312439 | 420.324341 | 392.445892 | 87.040092  | 84.737679  | 84.375801  | 70.302032  | 66.592064  | 69.698242  |
| gene-MA16_Dca023488               | 2.033617   | 2.782824   | 1.360411   | 2.555799   | 4.148103   | 3.350659   | 15.077177  | 12.410168  | 13.572362  |
| gene-MA16_Dca011955               | 2.088032   | 2.50294    | 2.169879   | 3.934515   | 4.187838   | 3.414795   | 7.524563   | 5.179792   | 7.266952   |
| gene-MA16_Dca011953               | 2.038745   | 1.022404   | 1.081431   | 0.871796   | 0.869383   | 1.115177   | 0.522944   | 0.561985   | 0.586669   |
| gene-MA16_Dca011959               | 90.774666  | 91.879524  | 91.197945  | 48.912769  | 46.190834  | 48.938602  | 52.568592  | 53.488064  | 52.259468  |
| gene-MA16_Dca014207               | 2.336659   | 2.010809   | 2.115573   | 2.233529   | 2.568869   | 1.611367   | 4.426001   | 4.837103   | 7.139393   |
| gene-MA16_Dca025360               | 273.892914 | 264.082672 | 257.681122 | 139.993591 | 136.672104 | 131.898605 | 114.372818 | 104.958801 | 111.049149 |
| gene-MA16_Dca021621               | 4.217412   | 5.329213   | 4.068122   | 15.550013  | 15.243752  | 17.302832  | 12.788564  | 15.366808  | 10.886891  |
| gene-MA16_Dca019436               | 23.097063  | 21.063322  | 25.215569  | 27.035814  | 25.931669  | 29.071518  | 58.348862  | 49.018597  | 51.123528  |
| gene-MA16_Dca021997               | 18.606245  | 20.830717  | 20.388905  | 0.409778   | 0.211125   | 0.21102    | 0.081273   | 0.070948   | 0.132803   |
| gene-MA16_Dca027662               | 2.982324   | 4.49543    | 3.722197   | 7.075168   | 6.968669   | 5.036271   | 8.798688   | 10.416272  | 7.784365   |
| gene-MA16_Dca018011               | 147.80423  | 139.813507 | 144.459076 | 11.658725  | 12.362735  | 10.771979  | 27.687532  | 27.967928  | 28.209183  |
| gene-MA16_Dca026719               | 2.43856    | 2.629457   | 2.434794   | 5.978258   | 5.384723   | 5.670424   | 6.933812   | 7.159992   | 6.221794   |
| Dendrobium_catenatum_newGene_8361 | 2.534154   | 2.639407   | 3.827987   | 1.430812   | 1.508503   | 1.348804   | 0.35531    | 0.600376   | 0.768314   |
| gene-MA16_Dca011984               | 7.33549    | 7.344219   | 7.416218   | 3.485153   | 3.316423   | 2.131558   | 0.880407   | 0.814736   | 1.447219   |
| gene-MA16_Dca009122               | 3.24129    | 3.033562   | 2.680228   | 2.954713   | 2.7104     | 2.997472   | 0.596329   | 0.681409   | 0.895442   |
| Dendrobium_catenatum_newGene_6638 | 1.081821   | 1.049406   | 1.388152   | 0.57561    | 0.559648   | 0.615575   | 0.917806   | 0.664194   | 1.200904   |

|                                    |            |            |            |            |            |            |            |            |            |
|------------------------------------|------------|------------|------------|------------|------------|------------|------------|------------|------------|
| Dendrobium_catenatum_newGene_1936  | 2.579542   | 1.93617    | 1.802121   | 2.833384   | 3.830015   | 4.07913    | 5.106298   | 4.913463   | 4.395444   |
| Dendrobium_catenatum_newGene_6188  | 15.872126  | 17.877371  | 16.055473  | 7.629888   | 7.01565    | 7.816457   | 4.252906   | 4.591409   | 7.064762   |
| Dendrobium_catenatum_newGene_7580  | 300.736969 | 291.36264  | 286.659302 | 67.880913  | 67.92189   | 18.341427  | 65.750168  | 61.330185  | 60.2258    |
| Dendrobium_catenatum_newGene_3464  | 65.949929  | 62.604374  | 64.325777  | 16.833746  | 16.431494  | 17.14012   | 17.315239  | 16.272583  | 15.421163  |
| gene-MA16_Dca013948                | 21.94117   | 23.795055  | 21.665071  | 8.754822   | 8.621155   | 8.521423   | 7.923222   | 7.671729   | 7.933725   |
| gene-MA16_Dca005627                | 0.520725   | 0.748381   | 0.698331   | 2.405126   | 1.931756   | 1.724332   | 6.890867   | 6.574109   | 6.203476   |
| gene-MA16_Dca008624                | 202.418823 | 209.127014 | 200.217712 | 60.141129  | 59.33416   | 58.495136  | 57.666534  | 54.966579  | 57.854881  |
| gene-MA16_Dca008623                | 5.796687   | 5.702898   | 6.570488   | 2.230901   | 2.084094   | 2.110242   | 1.828024   | 1.156815   | 1.180009   |
| gene-MA16_Dca012306                | 25.572254  | 22.650614  | 23.341679  | 14.327561  | 13.048875  | 12.466759  | 9.049765   | 9.624819   | 10.522511  |
| gene-MA16_Dca012302                | 573.157532 | 560.772766 | 572.368591 | 950.585449 | 953.095215 | 921.114868 | 1550.2981  | 1504.73474 | 1502.67725 |
| gene-MA16_Dca011455                | 711.307556 | 736.601318 | 703.551941 | 422.095093 | 400.295135 | 413.996521 | 361.928864 | 349.558136 | 340.000336 |
| gene-MA16_Dca002536                | 3.192031   | 2.456753   | 3.033264   | 4.864916   | 3.465653   | 3.884258   | 13.119973  | 9.306033   | 10.767741  |
| Dendrobium_catenatum_newGene_12160 | 26.931299  | 24.080761  | 20.213394  | 13.39449   | 9.895145   | 12.404589  | 11.574392  | 12.567652  | 9.00727    |
| Dendrobium_catenatum_newGene_2479  | 145.331329 | 155.041718 | 152.342651 | 10.314253  | 9.183331   | 9.817256   | 29.201672  | 27.404644  | 32.801395  |
| gene-MA16_Dca018622                | 154.334473 | 151.937393 | 152.475235 | 189.835266 | 183.819489 | 196.762527 | 387.153534 | 370.014282 | 371.38266  |
| gene-MA16_Dca018626                | 9.3127     | 8.26723    | 9.380526   | 22.147003  | 18.785349  | 20.380417  | 20.100384  | 22.88559   | 24.061735  |
| gene-MA16_Dca026774                | 4.897562   | 6.177621   | 5.502185   | 6.74057    | 6.550463   | 8.455237   | 14.139721  | 14.37779   | 15.126903  |
| gene-MA16_Dca024739                | 2.092738   | 1.03121    | 2.196007   | 2.337847   | 1.145221   | 1.796923   | 6.661682   | 3.824525   | 5.108338   |
| gene-MA16_Dca021815                | 645.515991 | 644.248657 | 642.820435 | 411.531799 | 407.700165 | 398.861725 | 276.05838  | 269.478088 | 257.497375 |
| gene-MA16_Dca021813                | 6.356923   | 6.861872   | 6.981946   | 0.186899   | 0.423557   | 1.670669   | 1.111646   | 0.730535   | 0.959532   |
| Dendrobium_catenatum_newGene_10566 | 113.857536 | 126.023598 | 114.997734 | 20.58563   | 21.28087   | 19.338078  | 9.243031   | 8.743424   | 7.501375   |
| gene-MA16_Dca022648                | 31.909706  | 33.825603  | 30.318914  | 14.870378  | 12.010106  | 11.91471   | 16.780262  | 15.361963  | 19.241581  |
| gene-MA16_Dca006026                | 6.620149   | 5.015553   | 4.978398   | 2.942361   | 4.514937   | 7.360249   | 0.59149    | 1.043443   | 0.671832   |
| gene-MA16_Dca009192                | 620.154358 | 611.86499  | 607.31665  | 325.648193 | 312.380859 | 325.551971 | 343.096893 | 323.826263 | 322.884583 |
| gene-MA16_Dca007862                | 1.532382   | 1.567117   | 2.758737   | 3.181251   | 1.717524   | 2.808093   | 5.403075   | 4.755744   | 5.193088   |
| gene-MA16_Dca007860                | 24.326431  | 25.393646  | 24.910097  | 48.304367  | 48.031643  | 52.020294  | 63.330791  | 61.034016  | 65.265121  |
| gene-MA16_Dca005702                | 73.50222   | 69.82782   | 66.885223  | 26.557278  | 26.867733  | 27.506105  | 24.28661   | 24.140038  | 24.724026  |
| gene-MA16_Dca004073                | 1.292935   | 1.154454   | 1.52764    | 0.242818   | 0.216608   | 0.388027   | 0          | 0.037486   | 0.116061   |

|                                    |            |            |            |            |            |            |            |            |            |
|------------------------------------|------------|------------|------------|------------|------------|------------|------------|------------|------------|
| gene-MA16_Dca003934                | 33.518436  | 35.702217  | 37.499546  | 17.7474    | 17.983917  | 15.578607  | 23.634348  | 22.315416  | 22.110939  |
| gene-MA16_Dca009341                | 12.018093  | 16.202183  | 13.041666  | 3.287886   | 3.031838   | 2.404238   | 0.614959   | 0.718435   | 1.006227   |
| Dendrobium_catenatum_newGene_6392  | 19.039562  | 17.124563  | 19.462179  | 8.647544   | 7.236665   | 8.197879   | 19.767385  | 20.137016  | 20.434874  |
| gene-MA16_Dca006348                | 53.554287  | 50.664677  | 52.228256  | 21.531759  | 16.917591  | 19.742945  | 75.66584   | 72.374947  | 72.455597  |
| gene-MA16_Dca024284                | 29.522978  | 25.682539  | 23.236645  | 13.822189  | 11.000088  | 12.936798  | 10.629784  | 11.56109   | 9.568851   |
| gene-MA16_Dca014244                | 1.028713   | 0.973936   | 1.472434   | 0.391219   | 0.28972    | 0.360612   | 1.070766   | 0.532724   | 0.472388   |
| gene-MA16_Dca014980                | 24.483463  | 28.813236  | 26.132532  | 13.693788  | 13.47109   | 13.919098  | 35.358822  | 34.851086  | 33.933872  |
| gene-MA16_Dca014982                | 48.432102  | 35.554413  | 31.360542  | 48.122948  | 52.198307  | 44.304886  | 117.279625 | 105.675835 | 110.482697 |
| gene-MA16_Dca013215                | 33.579208  | 30.799335  | 34.28009   | 3.908242   | 2.37856    | 3.596642   | 4.577882   | 4.703898   | 4.811649   |
| gene-MA16_Dca013216                | 34.902103  | 34.618618  | 37.293453  | 14.100276  | 14.262261  | 16.748697  | 12.44403   | 13.282576  | 12.833317  |
| gene-MA16_Dca010602                | 430.919952 | 417.45282  | 414.606415 | 113.501823 | 115.468689 | 104.370003 | 115.506691 | 118.500626 | 115.42746  |
| gene-MA16_Dca010607                | 10.399559  | 10.329254  | 7.903746   | 5.662681   | 4.04498    | 4.697549   | 6.756128   | 7.477108   | 4.58947    |
| Dendrobium_catenatum_newGene_10394 | 0.214078   | 0.336464   | 0.393623   | 0.504454   | 0.427954   | 0.731324   | 1.223624   | 1.538322   | 1.613299   |
| Dendrobium_catenatum_newGene_10398 | 1.172668   | 0.792214   | 0.746662   | 1.633274   | 1.995146   | 2.593933   | 1.93564    | 0.935918   | 1.60922    |
| gene-MA16_Dca000582                | 0.670211   | 1.0237     | 0.992385   | 1.372098   | 1.328067   | 1.913449   | 4.37165    | 3.315139   | 3.32102    |
| gene-MA16_Dca000267                | 21.552406  | 16.792475  | 17.217682  | 6.39769    | 8.590702   | 8.614717   | 8.875719   | 10.603902  | 10.431787  |
| gene-MA16_Dca003056                | 0.838066   | 1.207464   | 1.622568   | 0.785481   | 0.76658    | 0.872411   | 0.409546   | 0.562788   | 0.691517   |
| Dendrobium_catenatum_newGene_13159 | 5.108814   | 6.024313   | 7.005569   | 0.155101   | 1.779635   | 0.142101   | 6.060104   | 7.141027   | 0          |
| gene-MA16_Dca013641                | 126.394661 | 118.683578 | 120.397774 | 248.833206 | 246.015121 | 246.898651 | 330.771667 | 303.418365 | 303.269073 |
| gene-MA16_Dca013645                | 59.316162  | 61.981167  | 60.842724  | 30.328817  | 26.777807  | 24.854183  | 36.73098   | 36.755623  | 31.634832  |
| gene-MA16_Dca014519                | 1.857621   | 1.270155   | 1.327733   | 2.105949   | 1.634716   | 2.754112   | 3.411828   | 3.740291   | 3.459404   |
| gene-MA16_Dca018817                | 185.341522 | 194.849915 | 178.986679 | 335.904633 | 322.320007 | 321.199219 | 514.338928 | 511.487366 | 503.065948 |
| Dendrobium_catenatum_newGene_8734  | 26.812956  | 27.607008  | 24.072351  | 34.335453  | 34.304832  | 34.857128  | 63.87949   | 60.705677  | 66.219925  |
| gene-MA16_Dca021136                | 5.601493   | 5.869864   | 5.953862   | 3.573022   | 4.277436   | 4.112823   | 3.18487    | 2.439168   | 2.739513   |
| gene-MA16_Dca015393                | 31.711153  | 30.074413  | 26.689379  | 6.283834   | 7.240987   | 7.696815   | 8.068551   | 6.361248   | 6.209208   |
| gene-MA16_Dca007235                | 30.620869  | 27.706123  | 26.529921  | 17.759512  | 17.390644  | 16.355118  | 13.097935  | 12.376337  | 13.03864   |
| gene-MA16_Dca007588                | 62.80901   | 59.797615  | 62.284668  | 32.557552  | 31.367456  | 30.964842  | 30.137402  | 27.66972   | 28.992813  |
| gene-MA16_Dca027206                | 64.395538  | 63.273598  | 64.641182  | 64.775604  | 70.052628  | 73.953316  | 148.520325 | 144.020981 | 140.504456 |

|                                    |            |            |            |           |           |           |           |           |           |
|------------------------------------|------------|------------|------------|-----------|-----------|-----------|-----------|-----------|-----------|
| gene-MA16_Dca022321                | 10.354053  | 9.644069   | 11.426551  | 4.256224  | 2.724988  | 2.875097  | 4.342189  | 5.291634  | 4.33254   |
| gene-MA16_Dca024469                | 12.794717  | 12.150818  | 12.199294  | 3.047326  | 3.63388   | 3.362124  | 3.11081   | 3.628926  | 2.75069   |
| gene-MA16_Dca005513                | 6.377367   | 6.377447   | 6.638486   | 3.205706  | 2.780651  | 2.727373  | 2.746433  | 2.976559  | 2.658772  |
| Dendrobium_catenatum_newGene_5741  | 1.295628   | 1.172744   | 0.746724   | 3.395459  | 2.531312  | 3.596314  | 3.038861  | 3.062868  | 2.983765  |
| gene-MA16_Dca003214                | 71.752411  | 74.77182   | 69.233261  | 81.242195 | 80.798164 | 87.22393  | 39.001583 | 37.128494 | 37.612114 |
| Dendrobium_catenatum_newGene_11157 | 108.717218 | 109.296101 | 108.242673 | 47.694125 | 47.805532 | 46.332661 | 40.02766  | 38.822829 | 39.073547 |
| Dendrobium_catenatum_newGene_2826  | 2.220344   | 2.394384   | 3.465088   | 5.14578   | 5.968516  | 8.202389  | 14.660972 | 15.80143  | 14.94     |
| gene-MA16_Dca013875                | 0.229912   | 0.291361   | 0.158413   | 0.375084  | 0.629229  | 0.48972   | 1.619612  | 1.549356  | 1.57852   |
| gene-MA16_Dca015158                | 2.386207   | 2.800033   | 3.410025   | 3.845657  | 3.423986  | 3.741019  | 0.449998  | 0.488907  | 0.86314   |
| gene-MA16_Dca015153                | 27.590446  | 30.031364  | 30.981325  | 12.337446 | 12.650166 | 13.149548 | 18.79475  | 20.414282 | 19.379757 |
| gene-MA16_Dca024090                | 2.419233   | 2.207074   | 2.84876    | 2.307871  | 2.246016  | 2.708722  | 0.472733  | 0.543634  | 0.996473  |
| gene-MA16_Dca015848                | 13.207729  | 11.256203  | 13.792003  | 6.308993  | 4.411462  | 3.413503  | 5.817983  | 6.797646  | 5.038177  |
| gene-MA16_Dca020576                | 21.637316  | 22.098997  | 21.522007  | 11.415795 | 10.989046 | 11.589926 | 15.9136   | 15.326522 | 15.426612 |
| gene-MA16_Dca020574                | 0.198542   | 0.291885   | 0.696741   | 2.047941  | 1.566338  | 2.825479  | 2.407562  | 1.020352  | 1.089465  |
| gene-MA16_Dca026936                | 15.063456  | 15.976259  | 15.684431  | 37.841122 | 42.363033 | 33.86076  | 23.543119 | 26.594532 | 26.196608 |
| Dendrobium_catenatum_newGene_16292 | 46.77191   | 48.708712  | 44.343583  | 23.505904 | 24.312394 | 25.650335 | 39.617802 | 35.462245 | 37.907535 |
| gene-MA16_Dca014442                | 1.772837   | 2.495231   | 2.089      | 0.643027  | 0.847845  | 0.709915  | 1.893537  | 1.599848  | 1.879401  |
| gene-MA16_Dca014496                | 8.004957   | 6.749959   | 8.112105   | 13.654195 | 15.875616 | 12.74021  | 19.396389 | 19.901999 | 15.741837 |
| gene-MA16_Dca014729                | 6.633461   | 3.428249   | 3.911581   | 4.630006  | 6.066604  | 5.485493  | 9.147059  | 13.10116  | 12.819009 |
| Dendrobium_catenatum_newGene_1621  | 1.397202   | 1.286099   | 1.138984   | 0.592932  | 0.879887  | 1.050876  | 0.514064  | 0.746801  | 0.676011  |
| gene-MA16_Dca004957                | 0.974319   | 0.806788   | 0.407095   | 5.419459  | 5.137734  | 5.450398  | 5.822731  | 5.542256  | 5.500376  |
| gene-MA16_Dca004956                | 46.115913  | 51.59676   | 49.28931   | 18.654039 | 17.596811 | 21.105198 | 14.484521 | 10.299872 | 11.737502 |
| gene-MA16_Dca004955                | 9.148336   | 9.044814   | 7.474112   | 12.69071  | 14.336623 | 13.230981 | 18.481634 | 18.20162  | 18.000519 |
| gene-MA16_Dca004951                | 47.864395  | 38.827564  | 43.189705  | 20.322832 | 20.294441 | 20.708054 | 27.341208 | 24.562351 | 27.162701 |
| gene-MA16_Dca007792                | 12.415411  | 12.147816  | 11.922123  | 2.482223  | 1.826396  | 1.606758  | 2.466398  | 2.353357  | 2.819735  |
| gene-MA16_Dca007793                | 51.790829  | 54.555611  | 57.011429  | 5.541516  | 7.594676  | 7.384358  | 7.112287  | 5.915961  | 7.60202   |
| gene-MA16_Dca001795                | 1.615575   | 1.633983   | 2.263651   | 3.594786  | 3.996551  | 5.543554  | 2.103594  | 2.500157  | 2.692694  |
| gene-MA16_Dca006449                | 10.291533  | 8.194945   | 8.999757   | 3.389476  | 2.437373  | 2.140312  | 9.850331  | 8.849324  | 11.093895 |

|                                    |            |            |            |            |            |            |            |            |            |
|------------------------------------|------------|------------|------------|------------|------------|------------|------------|------------|------------|
| gene-MA16_Dca006440                | 2.609953   | 1.997252   | 2.664503   | 1.274046   | 0.905984   | 1.776052   | 1.333933   | 0.473019   | 1.190716   |
| gene-MA16_Dca008519                | 2.404549   | 3.181125   | 2.793351   | 5.525743   | 6.559687   | 5.351229   | 2.286668   | 2.378803   | 2.555972   |
| gene-MA16_Dca004172                | 11.148459  | 12.815096  | 11.175026  | 3.212267   | 3.822681   | 3.752536   | 3.310902   | 3.244973   | 3.356722   |
| gene-MA16_Dca011725                | 1.533372   | 1.58468    | 1.232944   | 0.239263   | 0.553961   | 0.415576   | 1.587623   | 1.561039   | 0.809121   |
| gene-MA16_Dca010927                | 64.570099  | 61.511868  | 60.026562  | 25.81992   | 21.322344  | 23.810553  | 20.010674  | 17.887918  | 17.101067  |
| gene-MA16_Dca012401                | 1.651864   | 2.59691    | 1.651348   | 0.783495   | 0.891884   | 0.982376   | 0.894865   | 0.476325   | 0.819573   |
| gene-MA16_Dca026267                | 15.225989  | 15.328601  | 11.483893  | 11.514664  | 16.576611  | 11.0994    | 5.617057   | 4.159898   | 3.896918   |
| gene-MA16_Dca009587                | 70.800613  | 64.48172   | 61.106533  | 98.276657  | 95.950722  | 90.329605  | 31.907572  | 29.28871   | 28.121138  |
| gene-MA16_Dca009585                | 223.047165 | 224.535828 | 227.585922 | 152.10054  | 150.796249 | 149.031128 | 108.966652 | 94.816803  | 97.634087  |
| gene-MA16_Dca009580                | 83.422989  | 77.27372   | 76.453346  | 91.218201  | 91.377281  | 86.332642  | 282.890167 | 239.443787 | 252.756119 |
| Dendrobium_catenatum_newGene_10907 | 23.408955  | 26.724525  | 26.138638  | 38.002975  | 39.047596  | 39.755486  | 74.002609  | 73.041039  | 72.391464  |
| gene-MA16_Dca025793                | 0.741154   | 1.090512   | 0.819371   | 1.08112    | 1.341529   | 1.035906   | 2.393169   | 2.181824   | 2.120947   |
| gene-MA16_Dca025245                | 27.110044  | 25.577469  | 31.195168  | 18.236658  | 22.006037  | 21.141689  | 10.693835  | 9.946446   | 13.687366  |
| Dendrobium_catenatum_newGene_4253  | 0.424502   | 0.160418   | 0.165193   | 0.218681   | 0.5575     | 0.344929   | 1.594785   | 0.878118   | 1.732468   |
| gene-MA16_Dca010118                | 168.826431 | 172.361633 | 171.832031 | 56.678726  | 56.442898  | 56.796246  | 52.196541  | 48.216263  | 46.321667  |
| gene-MA16_Dca010119                | 0.299186   | 0.386392   | 0.560163   | 0.118184   | 0.11077    | 0.083235   | 0.071488   | 0.078524   | 0.08043    |
| gene-MA16_Dca010112                | 3.730689   | 2.798279   | 3.611309   | 0.540059   | 0.682728   | 0.717586   | 0.547897   | 0.609701   | 0.239075   |
| gene-MA16_Dca010117                | 3.532986   | 3.007432   | 2.834657   | 7.683614   | 5.461024   | 6.071939   | 8.601687   | 11.708182  | 8.897419   |
| gene-MA16_Dca022301                | 1.792386   | 3.125167   | 2.941363   | 3.416073   | 4.52347    | 2.392775   | 6.478622   | 6.114069   | 5.945688   |
| gene-MA16_Dca022977                | 254.461945 | 241.451019 | 267.336212 | 384.014862 | 381.84256  | 387.824524 | 591.73999  | 590.746582 | 548.893311 |
| gene-MA16_Dca018300                | 7.497072   | 8.818688   | 7.92597    | 4.471882   | 5.179105   | 5.190969   | 3.742573   | 3.50295    | 3.446404   |
| gene-MA16_Dca014761                | 15.734187  | 16.390779  | 17.022951  | 27.456467  | 29.483019  | 26.866236  | 36.640541  | 34.73798   | 35.800518  |
| Dendrobium_catenatum_newGene_7335  | 1.571614   | 1.25467    | 1.589119   | 2.37262    | 3.174155   | 3.135077   | 3.024867   | 3.36063    | 3.753546   |
| gene-MA16_Dca001614                | 2.882364   | 3.100791   | 3.987092   | 2.157254   | 1.292038   | 1.574641   | 13.108078  | 11.005157  | 10.366121  |
| gene-MA16_Dca001612                | 0.66049    | 0.196478   | 0.20701    | 0.330833   | 0.143366   | 0.619409   | 1.710361   | 1.195546   | 1.516969   |
| gene-MA16_Dca000052                | 1.964858   | 1.457113   | 1.101062   | 2.659902   | 2.556765   | 3.505738   | 4.106351   | 3.589736   | 3.490133   |
| gene-MA16_Dca010350                | 3.248139   | 3.472522   | 2.386241   | 0.79877    | 1.195599   | 1.192752   | 3.872671   | 3.171486   | 2.589067   |
| gene-MA16_Dca010351                | 7.314487   | 7.648489   | 6.047525   | 1.584953   | 1.938407   | 2.137162   | 2.680167   | 1.814345   | 1.290118   |



|                                   |            |            |            |            |            |            |            |            |           |
|-----------------------------------|------------|------------|------------|------------|------------|------------|------------|------------|-----------|
| gene-MA16_Dca008704               | 315.519287 | 302.447571 | 298.255066 | 289.191101 | 294.698639 | 298.309631 | 141.431641 | 130.745911 | 141.67923 |
| gene-MA16_Dca016680               | 1.03885    | 0.907246   | 1.305406   | 0          | 0.402033   | 0.071624   | 0.189778   | 0.220816   | 0.035271  |
| gene-MA16_Dca012193               | 22.957098  | 27.22584   | 23.726822  | 1.367217   | 1.380785   | 3.772325   | 3.090768   | 3.925448   | 1.526936  |
| gene-MA16_Dca011555               | 2.437387   | 3.273762   | 2.264675   | 4.285773   | 3.191381   | 2.6766     | 10.463107  | 7.739575   | 7.160391  |
| gene-MA16_Dca016021               | 8.979134   | 7.754864   | 9.117213   | 7.279977   | 5.07239    | 5.300431   | 0.448927   | 0.694351   | 0.714149  |
| gene-MA16_Dca009429               | 5.591248   | 6.558516   | 6.684336   | 9.283718   | 6.521733   | 9.413169   | 16.101112  | 11.682549  | 13.507255 |
| gene-MA16_Dca009423               | 0.201715   | 0.064499   | 0.184254   | 0.281947   | 0.457151   | 0.212208   | 0.515036   | 0.544073   | 0.675729  |
| gene-MA16_Dca002368               | 28.325499  | 28.707535  | 29.001007  | 18.44771   | 15.077442  | 17.934227  | 13.227122  | 13.666165  | 13.064208 |
| gene-MA16_Dca023571               | 5.096502   | 4.520227   | 4.944651   | 4.245651   | 6.297256   | 4.245254   | 18.684002  | 17.726965  | 18.289015 |
| gene-MA16_Dca018549               | 50.996235  | 49.611328  | 51.04044   | 2.764514   | 2.158796   | 2.16397    | 3.922154   | 4.254834   | 4.417126  |
| gene-MA16_Dca018548               | 25.49976   | 30.187006  | 27.276529  | 9.925529   | 10.900779  | 9.518586   | 8.664907   | 9.476713   | 10.9675   |
| gene-MA16_Dca018542               | 10.123893  | 9.651554   | 9.903963   | 23.264084  | 21.625366  | 18.015743  | 22.236565  | 20.061132  | 20.330858 |
| gene-MA16_Dca017641               | 43.122608  | 46.536091  | 47.539143  | 16.141394  | 17.214872  | 17.938795  | 21.909948  | 18.635241  | 22.294136 |
| gene-MA16_Dca026430               | 43.586823  | 39.481586  | 40.479618  | 0.34273    | 0.863083   | 0.53239    | 0.523646   | 0.644365   | 1.244232  |
| gene-MA16_Dca018897               | 270.03009  | 255.245438 | 271.501068 | 17.631683  | 16.622925  | 15.604789  | 7.434265   | 5.73857    | 5.335505  |
| gene-MA16_Dca018899               | 33.680935  | 35.782524  | 34.720901  | 18.146851  | 18.172394  | 18.395512  | 14.945687  | 14.364445  | 14.831645 |
| gene-MA16_Dca020483               | 1.436873   | 1.780452   | 1.724932   | 0.281493   | 0.343915   | 0.370838   | 0.256779   | 0.553701   | 0.62124   |
| gene-MA16_Dca020484               | 167.007706 | 165.376938 | 157.56337  | 10.670512  | 9.952299   | 11.683979  | 10.274745  | 10.020905  | 10.694967 |
| gene-MA16_Dca015040               | 3.849895   | 3.763231   | 2.518025   | 2.471981   | 2.70557    | 2.358423   | 0.587401   | 1.227346   | 0.191624  |
| gene-MA16_Dca024232               | 341.747253 | 334.56601  | 325.83429  | 72.534882  | 69.076965  | 69.629631  | 39.573811  | 39.781708  | 41.362408 |
| Dendrobium_catenatum_newGene_8810 | 1.405703   | 1.3487     | 0.479724   | 1.399137   | 1.587766   | 2.330134   | 2.875037   | 2.42306    | 3.341976  |
| gene-MA16_Dca027282               | 32.98254   | 27.363367  | 28.982224  | 11.046693  | 8.830488   | 7.338985   | 9.870838   | 11.322585  | 8.7571    |
| gene-MA16_Dca027285               | 78.117706  | 78.575851  | 76.855293  | 29.952036  | 27.75765   | 31.940781  | 77.392517  | 79.879303  | 76.647285 |
| gene-MA16_Dca001457               | 37.575718  | 39.869297  | 39.384945  | 100.851196 | 105.30925  | 100.757751 | 143.470398 | 150.654358 | 146.41394 |
| gene-MA16_Dca004244               | 465.576294 | 413.223511 | 437.688538 | 421.739502 | 403.639038 | 352.74942  | 1166.76025 | 1051.46216 | 1036.9281 |
| gene-MA16_Dca004869               | 1.586146   | 0.888704   | 1.304454   | 1.086787   | 1.110648   | 0.564642   | 5.990355   | 4.411696   | 5.683155  |
| gene-MA16_Dca023397               | 0.439683   | 0.164359   | 0.438247   | 0.700095   | 0.534342   | 0.719696   | 0.80587    | 0.760679   | 0.962182  |
| gene-MA16_Dca023394               | 7.210632   | 5.605289   | 6.517032   | 2.730847   | 2.274267   | 2.263879   | 3.172309   | 3.41566    | 2.676164  |

|                                    |            |            |            |            |            |            |            |            |            |
|------------------------------------|------------|------------|------------|------------|------------|------------|------------|------------|------------|
| gene-MA16_Dca011343                | 39.917061  | 42.081417  | 39.516418  | 8.456025   | 7.641078   | 8.838844   | 13.243956  | 12.209416  | 11.580666  |
| Dendrobium_catenatum_newGene_2532  | 0.788351   | 0.436802   | 0.468807   | 1.684926   | 1.612698   | 2.530078   | 0.761016   | 1.619519   | 1.634904   |
| gene-MA16_Dca012839                | 2.353473   | 3.078983   | 2.546599   | 0.879906   | 0.755036   | 0.792013   | 0.680426   | 0.651478   | 0.671558   |
| gene-MA16_Dca019926                | 45.430954  | 40.799488  | 40.329025  | 17.330709  | 14.902767  | 13.278433  | 16.282839  | 17.138792  | 16.212919  |
| gene-MA16_Dca019928                | 0.547545   | 0.674062   | 0.786173   | 1.429095   | 1.283431   | 2.035177   | 1.291474   | 1.039282   | 1.321478   |
| gene-MA16_Dca014866                | 202.128494 | 197.842316 | 195.016235 | 40.253475  | 32.003288  | 32.608471  | 42.345779  | 40.981186  | 39.603271  |
| gene-MA16_Dca000157                | 11.215002  | 5.226193   | 8.266962   | 0.239188   | 1.300276   | 1.010846   | 2.424322   | 1.515005   | 1.014055   |
| Dendrobium_catenatum_newGene_5156  | 639.650763 | 592.233807 | 594.023216 | 585.323478 | 592.290837 | 491.095863 | 1286.58255 | 1055.96948 | 1189.10971 |
| gene-MA16_Dca014419                | 45.893986  | 45.337334  | 45.395756  | 101.69854  | 97.490852  | 108.967651 | 100.011703 | 106.762146 | 103.129677 |
| gene-MA16_Dca009212                | 1.68946    | 0.829218   | 1.389342   | 2.265645   | 0.995159   | 2.585859   | 4.007844   | 2.562341   | 3.906015   |
| gene-MA16_Dca009219                | 150.842621 | 138.777328 | 137.587997 | 47.742119  | 47.681149  | 46.813141  | 34.799847  | 32.785141  | 32.673607  |
| gene-MA16_Dca027957                | 67.270798  | 59.651211  | 65.679924  | 19.788504  | 42.568817  | 16.235012  | 15.984507  | 24.543156  | 28.409307  |
| gene-MA16_Dca025554                | 70.809929  | 68.452019  | 75.269165  | 144.156418 | 145.430939 | 148.631454 | 206.9328   | 196.95343  | 202.130783 |
| gene-MA16_Dca017856                | 13.819618  | 12.897615  | 12.85572   | 21.408833  | 16.204647  | 20.338589  | 44.519653  | 35.605629  | 38.828407  |
| gene-MA16_Dca017853                | 14.250247  | 18.752266  | 16.923717  | 33.95274   | 37.587543  | 34.676064  | 36.090397  | 34.423595  | 36.38599   |
| gene-MA16_Dca019487                | 28.636673  | 25.983768  | 31.236759  | 11.920455  | 16.587454  | 15.722898  | 10.218478  | 12.460841  | 17.096664  |
| gene-MA16_Dca019486                | 29.904442  | 28.816507  | 27.939291  | 15.911448  | 16.634844  | 16.414423  | 13.44194   | 14.804867  | 14.199631  |
| gene-MA16_Dca021388                | 231.960587 | 233.375336 | 224.930695 | 91.327255  | 84.384087  | 88.297058  | 77.88446   | 72.879822  | 74.490334  |
| gene-MA16_Dca021921                | 3.563516   | 4.068545   | 4.296785   | 1.660137   | 1.897561   | 1.709717   | 2.079771   | 2.16045    | 2.298989   |
| gene-MA16_Dca021927                | 31.710844  | 27.005232  | 28.764553  | 4.876283   | 3.528301   | 4.064487   | 1.771302   | 2.211077   | 0.341684   |
| gene-MA16_Dca021926                | 173.250473 | 176.690826 | 202.049973 | 81.447365  | 87.249275  | 77.43531   | 45.95488   | 57.086391  | 48.738113  |
| gene-MA16_Dca021924                | 12.677017  | 9.638823   | 13.880523  | 15.351892  | 14.410674  | 16.455475  | 8.086596   | 6.456543   | 5.31585    |
| Dendrobium_catenatum_newGene_14747 | 2.973744   | 3.277626   | 3.070226   | 2.866697   | 2.065984   | 1.960475   | 7.912516   | 10.046122  | 9.321995   |
| gene-MA16_Dca004134                | 6.156872   | 5.994611   | 6.771767   | 2.440561   | 1.744095   | 2.974958   | 2.048514   | 1.27771    | 0.986324   |
| gene-MA16_Dca004136                | 9.877764   | 8.779169   | 6.511894   | 2.982513   | 3.255353   | 4.672527   | 1.114362   | 1.896822   | 1.523171   |
| gene-MA16_Dca005417                | 1.854989   | 1.728756   | 1.598128   | 1.73462    | 2.521955   | 1.568014   | 0.187338   | 0.507126   | 0.385117   |
| gene-MA16_Dca004132                | 15.563163  | 16.976637  | 16.759842  | 9.036737   | 7.153271   | 7.305674   | 9.675627   | 9.435245   | 10.390628  |
| gene-MA16_Dca003150                | 187.446411 | 186.005859 | 182.965088 | 84.781532  | 92.556419  | 89.911995  | 71.137535  | 55.96759   | 66.892303  |

|                                    |            |            |            |            |            |            |            |            |            |
|------------------------------------|------------|------------|------------|------------|------------|------------|------------|------------|------------|
| gene-MA16_Dca028003                | 1.278517   | 2.111309   | 1.840132   | 1.436514   | 0.911251   | 2.000204   | 3.951172   | 2.828375   | 3.790274   |
| gene-MA16_Dca023007                | 31.039335  | 38.927147  | 40.873604  | 7.862184   | 6.82202    | 9.485444   | 6.044735   | 10.521625  | 12.583891  |
| gene-MA16_Dca023004                | 1.606395   | 1.772118   | 2.503532   | 8.551185   | 7.16473    | 8.787567   | 14.077641  | 12.942864  | 16.76664   |
| gene-MA16_Dca013358                | 9.839701   | 10.105742  | 11.470351  | 16.58378   | 12.966343  | 11.719871  | 40.032829  | 48.10284   | 37.1628    |
| gene-MA16_Dca022097                | 11.454168  | 11.411636  | 12.690429  | 6.767451   | 6.314665   | 6.154735   | 4.94317    | 4.717624   | 3.460939   |
| gene-MA16_Dca022757                | 388.226776 | 245.066086 | 303.065491 | 87.356285  | 176.28804  | 92.191704  | 124.008743 | 121.13176  | 146.823715 |
| gene-MA16_Dca022756                | 585.436218 | 579.500854 | 470.423035 | 138.122604 | 338.911133 | 205.074036 | 253.971237 | 262.228821 | 259.0737   |
| Dendrobium_catenatum_newGene_16804 | 0.912694   | 0.758151   | 0.542066   | 0.894473   | 0.414136   | 0.442397   | 2.003198   | 1.613076   | 2.15603    |
| gene-MA16_Dca028827                | 25.129547  | 26.283897  | 24.791422  | 55.939316  | 55.965504  | 54.890038  | 116.991982 | 107.504021 | 103.517632 |
| gene-MA16_Dca024190                | 2.82179    | 3.258461   | 5.298915   | 5.087886   | 6.515223   | 7.149985   | 15.115287  | 13.615833  | 15.07352   |
| gene-MA16_Dca015963                | 0.739624   | 1.266522   | 0.371554   | 2.397744   | 2.273942   | 1.908602   | 2.654603   | 2.427974   | 4.666472   |
| gene-MA16_Dca000344                | 18.887482  | 17.445755  | 20.339247  | 30.487551  | 29.887503  | 32.669273  | 58.925289  | 55.93779   | 53.267773  |
| gene-MA16_Dca011244                | 4.688002   | 3.878699   | 5.457288   | 6.862064   | 5.222789   | 7.312428   | 2.387479   | 2.912937   | 2.636046   |
| gene-MA16_Dca014584                | 41.730526  | 42.472076  | 42.609463  | 53.158669  | 52.480267  | 58.791397  | 98.378082  | 88.794899  | 89.710854  |
| gene-MA16_Dca014580                | 63.728737  | 65.703545  | 61.252659  | 5.470491   | 4.699041   | 5.472252   | 4.227226   | 5.057606   | 4.710575   |
| gene-MA16_Dca016731                | 1.00476    | 1.115498   | 0.554769   | 1.221013   | 0.677681   | 1.490216   | 2.876893   | 2.599852   | 2.451077   |
| gene-MA16_Dca012601                | 17.459293  | 14.886724  | 16.221195  | 2.296239   | 2.475785   | 2.890711   | 3.374579   | 3.687201   | 4.078673   |
| gene-MA16_Dca012602                | 18.436531  | 15.245629  | 15.771593  | 2.736329   | 2.550714   | 3.693712   | 3.536012   | 2.72892    | 4.677526   |
| gene-MA16_Dca018074                | 30.541794  | 33.976295  | 33.593967  | 5.256289   | 4.643435   | 5.473768   | 7.713049   | 7.55793    | 5.559336   |
| Dendrobium_catenatum_newGene_11556 | 29.289667  | 31.130804  | 30.099907  | 13.482931  | 12.580584  | 11.59588   | 7.818575   | 13.06646   | 11.410117  |
| gene-MA16_Dca025450                | 0.81711    | 0.744947   | 0.926457   | 1.705724   | 1.714173   | 1.986831   | 2.047246   | 1.972657   | 2.530329   |
| gene-MA16_Dca019388                | 2.648188   | 2.852554   | 3.256243   | 0          | 0          | 0          | 0          | 0          | 0.15147    |
| gene-MA16_Dca019382                | 5.049964   | 4.121892   | 4.730419   | 2.499463   | 1.586856   | 3.637838   | 0.314404   | 0.593436   | 0.545007   |
| gene-MA16_Dca018383                | 7.296108   | 12.384673  | 10.294924  | 2.242751   | 4.980914   | 2.126412   | 0.997389   | 1.932898   | 1.300978   |
| gene-MA16_Dca025768                | 0.605492   | 0.450408   | 0.348724   | 1.347631   | 1.160038   | 1.563517   | 1.093556   | 0.752681   | 0.631579   |
| Dendrobium_catenatum_newGene_147   | 1.04983    | 1.060679   | 1.055652   | 2.199751   | 2.525713   | 3.053085   | 2.810191   | 2.267194   | 3.478134   |
| Dendrobium_catenatum_newGene_145   | 1.558475   | 1.956892   | 1.614214   | 2.565013   | 2.901533   | 2.676054   | 1.456101   | 1.244665   | 1.231042   |
| gene-MA16_Dca018928                | 5.70802    | 3.79071    | 3.583532   | 5.855578   | 4.644027   | 4.644028   | 9.901462   | 8.390902   | 9.732859   |

|                                   |            |            |            |            |            |            |            |            |            |
|-----------------------------------|------------|------------|------------|------------|------------|------------|------------|------------|------------|
| gene-MA16_Dca015550               | 4.315868   | 5.056518   | 5.624441   | 1.245227   | 1.020503   | 0.936184   | 0.89481    | 1.613043   | 0.825997   |
| gene-MA16_Dca015553               | 24.135046  | 23.112202  | 25.604233  | 65.83728   | 63.734245  | 62.210564  | 139.733673 | 142.875336 | 142.804245 |
| gene-MA16_Dca020172               | 0.712309   | 0.711692   | 0.525855   | 0          | 0          | 0          | 0.677399   | 1.041985   | 1.065084   |
| gene-MA16_Dca005279               | 8.69501    | 10.736605  | 9.141397   | 4.025116   | 3.512213   | 3.839048   | 2.716109   | 2.234985   | 2.656689   |
| gene-MA16_Dca001696               | 21.523178  | 20.41785   | 22.438623  | 31.952639  | 29.5655    | 31.504227  | 51.410721  | 48.818626  | 41.855873  |
| gene-MA16_Dca001699               | 309.317322 | 300.05304  | 316.791626 | 361.174347 | 349.075806 | 364.081299 | 781.794189 | 763.729858 | 761.943176 |
| gene-MA16_Dca005188               | 7.121715   | 7.629834   | 8.780935   | 0.377605   | 0.27493    | 0.552458   | 2.797416   | 3.126092   | 2.372027   |
| gene-MA16_Dca008252               | 1.981466   | 2.177333   | 1.469264   | 2.093974   | 1.27886    | 2.000367   | 5.441443   | 4.042302   | 4.146948   |
| gene-MA16_Dca004584               | 49.586788  | 55.821526  | 50.48708   | 18.50798   | 16.225592  | 18.662525  | 16.336466  | 13.961883  | 18.35541   |
| gene-MA16_Dca004580               | 126.405235 | 134.003128 | 134.501251 | 19.939367  | 18.541122  | 20.519762  | 4.7184     | 4.803288   | 4.775741   |
| gene-MA16_Dca001037               | 203.457886 | 216.947067 | 205.543427 | 142.856705 | 131.754257 | 137.367355 | 68.776749  | 62.578613  | 69.016525  |
| gene-MA16_Dca011009               | 0.929284   | 0.580655   | 0.668559   | 2.440417   | 1.154091   | 1.829234   | 4.70727    | 5.299236   | 4.954466   |
| gene-MA16_Dca000632               | 87.087486  | 90.079086  | 87.782814  | 11.843521  | 13.469231  | 13.354083  | 24.988729  | 24.839542  | 25.30039   |
| gene-MA16_Dca000634               | 1.981121   | 4.176454   | 3.464348   | 4.35833    | 5.951605   | 4.199986   | 11.606476  | 7.991292   | 6.514274   |
| gene-MA16_Dca000638               | 675.447876 | 656.155273 | 678.465393 | 371.106323 | 384.703949 | 365.311859 | 303.459686 | 289.978699 | 266.715576 |
| gene-MA16_Dca012724               | 1.586592   | 1.68454    | 2.597845   | 2.716826   | 2.431434   | 2.773586   | 5.502796   | 5.817956   | 5.558508   |
| gene-MA16_Dca002090               | 4.220893   | 3.116008   | 4.49487    | 10.398801  | 8.418028   | 9.467053   | 13.009362  | 11.453328  | 10.57338   |
| Dendrobium_catenatum_newGene_2006 | 1.189311   | 1.519394   | 1.648071   | 4.252268   | 5.586129   | 4.921785   | 3.022806   | 4.415146   | 4.430295   |
| gene-MA16_Dca022117               | 14.604096  | 13.128243  | 17.069065  | 49.753246  | 43.833176  | 48.706497  | 58.5313    | 48.969471  | 50.23653   |
| gene-MA16_Dca022114               | 5.745144   | 4.697165   | 5.680613   | 5.314311   | 5.211484   | 5.387201   | 18.415787  | 16.302282  | 17.212086  |
| gene-MA16_Dca024878               | 9.731104   | 9.529923   | 9.457291   | 3.929929   | 4.538486   | 3.509177   | 4.733559   | 5.180452   | 5.177145   |
| gene-MA16_Dca014371               | 5.007853   | 5.190559   | 4.63837    | 4.23744    | 4.942873   | 5.187289   | 36.946022  | 36.557152  | 41.334858  |
| Dendrobium_catenatum_newGene_4513 | 4.438997   | 4.148548   | 3.691274   | 2.661772   | 3.179518   | 2.294697   | 0.894717   | 1.643541   | 1.710271   |
| gene-MA16_Dca015020               | 209.225891 | 204.97998  | 206.640701 | 9.500467   | 12.94115   | 11.163256  | 8.324949   | 8.18365    | 8.159287   |
| gene-MA16_Dca021755               | 5.740919   | 5.205975   | 4.710906   | 0.854417   | 0.58524    | 0.898279   | 1.103111   | 0.775145   | 1.558785   |
| gene-MA16_Dca021756               | 0.524296   | 0.586256   | 0.401674   | 1.078842   | 1.131714   | 0.702741   | 2.087121   | 2.325363   | 2.574174   |
| gene-MA16_Dca021753               | 1.298613   | 0.715528   | 1.309195   | 2.642886   | 2.213669   | 2.429178   | 3.397925   | 2.35754    | 3.40105    |
| gene-MA16_Dca020409               | 892.212219 | 866.41449  | 876.249695 | 405.487549 | 395.816193 | 389.135193 | 245.262619 | 246.477127 | 256.063812 |

|                     |            |            |            |            |            |            |            |            |           |
|---------------------|------------|------------|------------|------------|------------|------------|------------|------------|-----------|
| gene-MA16_Dca020402 | 0.971503   | 0.488914   | 0.188109   | 0.689922   | 0          | 0.640491   | 1.843398   | 1.783694   | 2.092974  |
| gene-MA16_Dca027750 | 14.75464   | 17.598938  | 18.568991  | 23.335493  | 28.203438  | 29.843601  | 41.719635  | 43.741337  | 46.906406 |
| gene-MA16_Dca023983 | 136.47229  | 140.263    | 142.156693 | 67.040878  | 66.769295  | 68.935234  | 51.936077  | 46.780128  | 48.94236  |
| gene-MA16_Dca023322 | 95.73864   | 97.166595  | 105.027084 | 37.100071  | 34.378296  | 37.487614  | 55.413803  | 53.038403  | 45.917755 |
| gene-MA16_Dca025860 | 36.192165  | 38.889515  | 34.791973  | 0.271997   | 0.587442   | 0.742043   | 0.607238   | 0.388374   | 0.275836  |
| gene-MA16_Dca025869 | 87.30307   | 86.778992  | 81.676216  | 23.996883  | 18.12381   | 20.568113  | 22.202282  | 22.845684  | 21.589729 |
| gene-MA16_Dca019170 | 11.964095  | 12.217596  | 13.646401  | 3.850455   | 4.502881   | 4.530344   | 5.640564   | 5.368116   | 6.134031  |
| gene-MA16_Dca019178 | 8.266148   | 10.209988  | 8.104845   | 1.232164   | 1.854423   | 1.638659   | 1.732004   | 1.355562   | 2.208145  |
| gene-MA16_Dca014030 | 128.075317 | 161.579163 | 113.550484 | 54.012737  | 77.712929  | 65.063148  | 46.842533  | 35.030388  | 46.74165  |
| gene-MA16_Dca005846 | 6.377629   | 7.386596   | 7.889584   | 2.014366   | 1.280375   | 1.748967   | 1.829598   | 1.326509   | 1.377011  |
| gene-MA16_Dca005848 | 55.724335  | 55.590099  | 48.868294  | 15.407818  | 12.48734   | 13.952938  | 13.687418  | 13.779039  | 13.815207 |
| gene-MA16_Dca021416 | 4.323927   | 4.821951   | 4.003412   | 11.262101  | 9.516635   | 10.399026  | 18.607443  | 15.284555  | 18.177448 |
| gene-MA16_Dca003878 | 72.029015  | 62.926773  | 57.037369  | 18.737986  | 12.656759  | 18.872128  | 14.623782  | 11.270405  | 12.135666 |
| gene-MA16_Dca003875 | 5.630464   | 4.506284   | 4.384168   | 0          | 0          | 0          | 0          | 0.261723   | 0         |
| gene-MA16_Dca007551 | 31.246059  | 31.041052  | 29.802641  | 3.660832   | 2.819899   | 3.527707   | 3.071729   | 2.693661   | 3.641158  |
| gene-MA16_Dca007556 | 9.564692   | 6.404932   | 9.643289   | 0.173067   | 0.435002   | 0.184742   | 0.916602   | 0.456141   | 1.225077  |
| gene-MA16_Dca007555 | 41.830063  | 42.125515  | 41.386883  | 4.926569   | 4.526883   | 3.883552   | 6.771199   | 5.094367   | 4.553141  |
| gene-MA16_Dca011219 | 3.650676   | 2.568871   | 3.008083   | 5.575836   | 5.696237   | 6.1057     | 6.71175    | 6.075306   | 6.99126   |
| gene-MA16_Dca010250 | 9.90586    | 11.183482  | 8.638814   | 12.0099    | 11.373323  | 10.463508  | 2.683509   | 2.454154   | 3.355333  |
| gene-MA16_Dca004775 | 19.054525  | 17.552174  | 18.177193  | 2.481009   | 2.470793   | 1.509521   | 1.974054   | 1.709896   | 2.13887   |
| gene-MA16_Dca008428 | 17.987606  | 16.407721  | 18.108961  | 39.972839  | 40.162319  | 39.217297  | 58.181187  | 62.696457  | 54.491875 |
| gene-MA16_Dca003467 | 0.601958   | 0.731142   | 1.147904   | 0.035402   | 0.041643   | 0          | 0.397751   | 0.760943   | 1.084846  |
| gene-MA16_Dca016962 | 219.416718 | 218.916641 | 209.78624  | 31.157238  | 27.921314  | 28.203199  | 18.480034  | 15.847533  | 17.691822 |
| gene-MA16_Dca016964 | 1.70999    | 1.869019   | 1.559997   | 0.587995   | 0.594112   | 0.337265   | 0.60471    | 0.585584   | 0.514468  |
| gene-MA16_Dca012098 | 53.490967  | 53.875187  | 54.969097  | 104.817604 | 111.741524 | 116.351273 | 116.451134 | 116.361565 | 122.85997 |
| gene-MA16_Dca003790 | 6.130068   | 7.101796   | 5.25803    | 2.704946   | 2.370905   | 2.516825   | 1.884999   | 1.904394   | 2.410306  |
| gene-MA16_Dca003792 | 18.98201   | 22.942303  | 21.710878  | 8.821297   | 8.023097   | 9.959624   | 7.190692   | 8.800436   | 9.668893  |
| gene-MA16_Dca011613 | 1.365224   | 1.490659   | 2.124739   | 5.471442   | 5.927102   | 4.070706   | 4.368202   | 3.539889   | 3.347268  |

|                                 |            |            |            |            |            |            |            |            |            |
|---------------------------------|------------|------------|------------|------------|------------|------------|------------|------------|------------|
| gene-MA16_Dca011610             | 14.131591  | 14.573686  | 19.253057  | 0.672195   | 0          | 0          | 0.431222   | 0          | 0.372467   |
| gene-MA16_Dca011611             | 1.960306   | 2.302388   | 2.072602   | 0.972057   | 1.187387   | 0.91076    | 1.644      | 0.768544   | 0.756859   |
| gene-MA16_Dca022838             | 0.105466   | 0          | 0.096739   | 0.118822   | 0.054201   | 0.094676   | 0.858363   | 0.840917   | 0.350278   |
| gene-MA16_Dca005510             | 12.801328  | 12.711946  | 13.480817  | 8.680684   | 6.972004   | 8.383879   | 6.870655   | 6.066944   | 6.523464   |
| gene-MA16_Dca009293             | 135.442688 | 131.286713 | 132.82341  | 45.05904   | 41.01194   | 39.825932  | 54.854961  | 55.374805  | 57.0481    |
| gene-MA16_Dca017768             | 34.3792    | 31.861113  | 32.372574  | 4.521166   | 5.742768   | 4.193015   | 5.764764   | 3.641287   | 5.708763   |
| gene-MA16_Dca015720             | 3.858496   | 3.895761   | 3.936473   | 8.262855   | 8.813507   | 8.779738   | 11.452271  | 12.746258  | 11.278517  |
| gene-MA16_Dca014239             | 195.980896 | 193.459854 | 190.437271 | 278.875793 | 278.459137 | 274.306458 | 477.386505 | 443.029236 | 436.0159   |
| gene-MA16_Dca014231             | 17.338276  | 16.610903  | 17.487034  | 6.257419   | 4.662043   | 3.180885   | 2.635622   | 3.146558   | 2.946921   |
| gene-MA16_Dca025334             | 50.006458  | 51.145935  | 47.307819  | 61.813438  | 59.461498  | 62.084934  | 110.757225 | 108.141266 | 107.451744 |
| gene-MA16_Dca018475             | 13.039593  | 12.212105  | 10.671327  | 18.313194  | 14.219707  | 20.566326  | 39.172333  | 41.122684  | 45.425938  |
| gene-MA16_Dca006962             | 489.766083 | 481.089203 | 449.375641 | 235.327103 | 229.633438 | 232.688599 | 492.920807 | 453.11972  | 481.486328 |
| Dendrobium_catenum_newGene_5297 | 2.857932   | 3.466053   | 3.330146   | 0.722535   | 0.478734   | 0.747901   | 0.910535   | 0.711789   | 1.014883   |
| gene-MA16_Dca027654             | 32.294388  | 34.663082  | 36.58057   | 7.126677   | 3.930859   | 6.701902   | 6.488811   | 5.492193   | 4.893297   |
| gene-MA16_Dca023828             | 0.244945   | 0.547092   | 0.347967   | 0.92956    | 0.350174   | 0.347727   | 1.830807   | 1.374022   | 1.612262   |
| gene-MA16_Dca004981             | 17.235561  | 16.903442  | 15.870067  | 8.556687   | 8.83686    | 8.799945   | 11.95585   | 11.234326  | 10.372682  |
| gene-MA16_Dca028282             | 119.118477 | 127.644157 | 110.361794 | 18.725288  | 21.178865  | 19.327579  | 7.501738   | 6.144003   | 7.860258   |
| gene-MA16_Dca006278             | 170.82074  | 180.236359 | 168.894135 | 76.276375  | 76.714996  | 78.733536  | 78.353767  | 73.111542  | 78.157967  |
| gene-MA16_Dca006274             | 2.772999   | 2.214736   | 2.999413   | 5.652016   | 4.951866   | 4.721761   | 10.37854   | 10.32731   | 9.308878   |
| gene-MA16_Dca006273             | 11.884568  | 13.619964  | 9.375297   | 17.237211  | 16.169584  | 15.113078  | 31.218157  | 28.024334  | 27.659306  |
| gene-MA16_Dca013931             | 24.608501  | 24.617147  | 24.546307  | 10.633046  | 8.061169   | 8.9203     | 4.904395   | 5.464571   | 4.843976   |
| gene-MA16_Dca009940             | 10.182365  | 13.207084  | 10.395306  | 2.759642   | 4.363744   | 4.281564   | 4.343753   | 3.527011   | 3.346062   |
| gene-MA16_Dca012682             | 34.301254  | 30.194616  | 37.862362  | 68.408653  | 60.7976    | 64.193596  | 94.141953  | 88.087212  | 92.502106  |
| gene-MA16_Dca012685             | 27.97613   | 27.077375  | 25.607376  | 13.160261  | 15.438581  | 12.496263  | 17.481344  | 18.462805  | 17.091976  |
| gene-MA16_Dca011427             | 6.695917   | 5.682103   | 3.79172    | 2.335838   | 3.554318   | 4.590003   | 12.955618  | 10.399559  | 9.641954   |
| gene-MA16_Dca013481             | 31.31325   | 33.322956  | 34.306335  | 43.215691  | 46.458511  | 39.828579  | 23.623804  | 19.413965  | 19.10644   |
| gene-MA16_Dca013153             | 12.278036  | 10.300286  | 11.54124   | 3.532259   | 6.353972   | 5.29288    | 5.914844   | 8.318798   | 4.894724   |
| gene-MA16_Dca023775             | 52.023388  | 51.182938  | 51.866463  | 42.44487   | 39.101891  | 44.994301  | 14.743726  | 13.681095  | 16.684877  |

|                                    |            |            |            |            |            |            |            |            |            |
|------------------------------------|------------|------------|------------|------------|------------|------------|------------|------------|------------|
| gene-MA16_Dca023776                | 24.920359  | 24.257519  | 22.450256  | 21.267757  | 22.534224  | 18.497213  | 8.815861   | 8.153641   | 8.958561   |
| gene-MA16_Dca026185                | 5.71454    | 4.671242   | 7.260074   | 20.437708  | 11.810018  | 19.255192  | 27.052797  | 28.118143  | 28.422579  |
| gene-MA16_Dca014687                | 16.411119  | 16.432959  | 16.380121  | 9.828663   | 11.203874  | 10.513697  | 8.845184   | 7.056883   | 9.623595   |
| gene-MA16_Dca022603                | 0.61896    | 0.786931   | 0.945228   | 0.444301   | 0.122881   | 0.311006   | 0.897773   | 0.681746   | 0.443272   |
| gene-MA16_Dca024764                | 418.08609  | 399.054535 | 428.790039 | 187.101974 | 198.443436 | 196.567719 | 183.128067 | 179.237534 | 184.34285  |
| Dendrobium_catenatum_newGene_490   | 5.662571   | 6.326342   | 4.901515   | 0.343302   | 0.42462    | 0.244655   | 1.72051    | 0.757273   | 0.583566   |
| gene-MA16_Dca022930                | 20.353815  | 22.094231  | 18.9258    | 8.663925   | 8.606791   | 7.366069   | 5.071594   | 4.981859   | 4.504272   |
| Dendrobium_catenatum_newGene_9503  | 15.867708  | 18.546719  | 16.304663  | 3.413522   | 3.37394    | 2.995136   | 2.429935   | 3.465244   | 3.76408    |
| gene-MA16_Dca007851                | 41.60009   | 41.419449  | 42.82132   | 8.296732   | 6.94954    | 7.938718   | 8.257898   | 9.635299   | 9.526649   |
| gene-MA16_Dca005756                | 1.157643   | 1.207      | 0.6655     | 1.013013   | 1.188374   | 1.368097   | 2.881185   | 3.186545   | 3.375104   |
| gene-MA16_Dca016534                | 23.696228  | 23.066717  | 22.597628  | 39.359993  | 39.208252  | 36.155651  | 58.839226  | 56.966339  | 54.380219  |
| gene-MA16_Dca003943                | 2.103411   | 2.667459   | 2.332182   | 0.308187   | 0.241412   | 0.399989   | 0          | 0.427858   | 0.11221    |
| gene-MA16_Dca003949                | 242.493073 | 244.947571 | 243.023224 | 146.80191  | 131.385803 | 144.506729 | 89.25145   | 92.308876  | 88.633972  |
| gene-MA16_Dca009396                | 345.088135 | 328.011688 | 338.220245 | 135.347275 | 141.632202 | 138.628433 | 137.249344 | 133.986435 | 123.144951 |
| gene-MA16_Dca009395                | 77.178185  | 73.928513  | 68.349388  | 20.811209  | 21.117434  | 21.808102  | 19.076015  | 18.447897  | 20.411509  |
| gene-MA16_Dca009392                | 3.645816   | 3.348429   | 3.785857   | 1.706327   | 0.804296   | 1.143565   | 1.922049   | 1.432038   | 1.16096    |
| gene-MA16_Dca013011                | 128.596161 | 121.829567 | 122.476974 | 227.069473 | 245.274521 | 243.08992  | 114.172218 | 120.800522 | 111.83268  |
| gene-MA16_Dca012943                | 730.677734 | 722.263123 | 725.909241 | 1335.08972 | 1279.0033  | 1271.67773 | 2268.5332  | 2148.98291 | 2133.01685 |
| gene-MA16_Dca012941                | 317.679382 | 309.986389 | 315.458893 | 617.693176 | 595.149963 | 586.547668 | 1118.63879 | 1104.32446 | 1055.74292 |
| Dendrobium_catenatum_newGene_2993  | 1.283793   | 0.976985   | 1.008806   | 0.836345   | 1.18089    | 1.354383   | 2.285023   | 2.136981   | 3.08868    |
| gene-MA16_Dca001589                | 0.817501   | 1.107076   | 1.373872   | 2.212445   | 0.972274   | 2.376579   | 5.051588   | 3.446909   | 3.621444   |
| gene-MA16_Dca008236                | 4.851416   | 3.277613   | 6.038364   | 0.840186   | 1.022696   | 0.771055   | 1.482362   | 2.093372   | 2.123804   |
| Dendrobium_catenatum_newGene_14438 | 1.896181   | 2.122845   | 2.846293   | 3.912056   | 3.582285   | 2.629316   | 7.318847   | 6.853438   | 6.110881   |
| gene-MA16_Dca010631                | 175.013275 | 178.088623 | 166.862854 | 93.435051  | 84.636391  | 86.072075  | 312.065735 | 313.309937 | 319.42511  |
| gene-MA16_Dca010630                | 0.38837    | 0.416044   | 0.296896   | 0.692342   | 1.595927   | 0.685367   | 1.844582   | 1.423642   | 1.565705   |
| gene-MA16_Dca016670                | 2.941102   | 2.394459   | 3.02827    | 4.625489   | 4.644912   | 4.578987   | 14.017823  | 13.829855  | 13.073166  |
| gene-MA16_Dca016678                | 1.913033   | 2.382137   | 2.391921   | 0.287384   | 0.419624   | 0.858947   | 0.090011   | 0.429328   | 0.12771    |
| gene-MA16_Dca017692                | 17.288334  | 16.780453  | 15.990628  | 5.773202   | 6.556962   | 6.234068   | 5.197344   | 3.962875   | 4.479703   |

|                                   |            |            |            |            |            |            |            |            |            |
|-----------------------------------|------------|------------|------------|------------|------------|------------|------------|------------|------------|
| gene-MA16_Dca017694               | 3488.99341 | 3432.3523  | 3546.65332 | 2054.64795 | 2103.54663 | 2047.66821 | 1227.49963 | 1279.75024 | 1198.74829 |
| gene-MA16_Dca017696               | 1607.68359 | 1640.47778 | 1646.85095 | 1035.43567 | 1089.88232 | 1015.68842 | 699.510193 | 753.961304 | 760.730835 |
| gene-MA16_Dca018849               | 2.371834   | 3.030972   | 3.573975   | 0.788094   | 1.128402   | 1.12612    | 1.195122   | 1.762617   | 1.358931   |
| gene-MA16_Dca015699               | 9.736537   | 9.213485   | 7.717664   | 1.850778   | 0.950605   | 0.779763   | 0.509724   | 0.281976   | 0.918068   |
| Dendrobium_catenatum_newGene_8740 | 4.375113   | 3.668088   | 2.259877   | 3.176646   | 2.953581   | 2.894333   | 1.185509   | 0.701779   | 0.723065   |
| gene-MA16_Dca015347               | 0.945966   | 1.457309   | 0.860512   | 2.044264   | 1.727037   | 2.436776   | 3.572704   | 4.524814   | 4.317655   |
| gene-MA16_Dca001956               | 0.24077    | 0.436293   | 0.713037   | 0.743844   | 0.659065   | 0.731442   | 1.153138   | 1.04911    | 1.663909   |
| gene-MA16_Dca000265               | 51.142693  | 50.945213  | 51.701908  | 19.059227  | 18.192036  | 16.354237  | 21.486761  | 19.986065  | 18.572945  |
| gene-MA16_Dca008357               | 86.925056  | 81.017143  | 86.339043  | 1.815241   | 1.983442   | 1.678713   | 1.99385    | 1.919806   | 1.286355   |
| gene-MA16_Dca008356               | 10.366324  | 11.598434  | 10.474154  | 6.326414   | 5.091172   | 5.194472   | 2.691827   | 1.747781   | 2.383942   |
| gene-MA16_Dca000260               | 4.878693   | 4.283629   | 4.180134   | 0.64526    | 0.807032   | 0.459377   | 1.400267   | 0.959423   | 1.31231    |
| gene-MA16_Dca001377               | 14.073636  | 14.071088  | 14.356796  | 18.210917  | 20.894199  | 17.98703   | 68.805923  | 62.955605  | 64.747658  |
| gene-MA16_Dca014401               | 0.690161   | 0.255688   | 0.424048   | 1.012575   | 0.73657    | 0.876824   | 3.578906   | 2.476067   | 3.595315   |
| gene-MA16_Dca023429               | 15.534016  | 10.370608  | 16.149309  | 1.241074   | 0.426405   | 0.966797   | 0.680991   | 0.486642   | 0          |
| gene-MA16_Dca025698               | 0.817658   | 0.480072   | 0.882979   | 0.567326   | 0.212046   | 0.240857   | 1.034154   | 1.263682   | 1.607459   |
| gene-MA16_Dca011125               | 39.279823  | 43.299606  | 40.979858  | 16.282846  | 14.16426   | 16.482718  | 11.951666  | 13.174097  | 12.073559  |
| gene-MA16_Dca000777               | 144.599869 | 135.841995 | 131.391724 | 49.750801  | 47.550102  | 55.987999  | 64.846535  | 65.817276  | 69.156769  |
| gene-MA16_Dca016470               | 87.743263  | 80.975471  | 85.267899  | 183.885239 | 183.318253 | 193.527451 | 243.068604 | 234.080658 | 233.288879 |
| gene-MA16_Dca004292               | 0.357162   | 0.436876   | 0.849005   | 1.269917   | 1.018526   | 1.516161   | 3.947716   | 3.737287   | 2.953896   |
| gene-MA16_Dca004299               | 2.332575   | 1.851299   | 1.28656    | 6.707846   | 4.183908   | 4.508115   | 4.423982   | 4.196878   | 3.261807   |
| gene-MA16_Dca023125               | 3.584628   | 3.352308   | 3.856738   | 0.358585   | 0.211718   | 0.274124   | 0.053192   | 0.242534   | 0.133199   |
| gene-MA16_Dca008831               | 11.853204  | 12.676802  | 12.967891  | 0          | 0.502291   | 0.105506   | 0.509751   | 0.718677   | 1.018541   |
| gene-MA16_Dca025005               | 27.521198  | 26.920551  | 31.787735  | 11.078571  | 9.301321   | 11.303226  | 17.588459  | 13.799009  | 14.98333   |
| gene-MA16_Dca022385               | 0.402783   | 0          | 0.159435   | 2.545759   | 1.679617   | 0.877378   | 8.751765   | 7.200827   | 6.815374   |
| gene-MA16_Dca024061               | 4.255911   | 4.830959   | 5.407838   | 2.711987   | 2.201801   | 2.220796   | 1.865886   | 1.871721   | 3.070634   |
| gene-MA16_Dca024066               | 64.020996  | 62.357037  | 63.382347  | 27.070221  | 25.170643  | 25.768427  | 56.189098  | 52.665855  | 59.539806  |
| gene-MA16_Dca020528               | 8.879079   | 7.380456   | 8.888156   | 5.955489   | 4.366923   | 4.217991   | 2.515387   | 2.648157   | 2.677088   |
| gene-MA16_Dca016516               | 0.577467   | 0.873068   | 0.590772   | 0.401162   | 0.639566   | 0.532215   | 0.2861     | 0.393879   | 0.194946   |



|                                    |            |            |            |            |            |            |            |            |            |
|------------------------------------|------------|------------|------------|------------|------------|------------|------------|------------|------------|
| gene-MA16_Dca016511                | 50.127132  | 50.18438   | 50.774887  | 28.293112  | 29.255276  | 25.284277  | 25.169384  | 25.643829  | 23.720287  |
| gene-MA16_Dca029129                | 21.333662  | 21.77981   | 20.181973  | 45.823223  | 41.163765  | 34.141685  | 61.860619  | 52.139923  | 54.021866  |
| gene-MA16_Dca023246                | 2.602988   | 2.590919   | 1.84185    | 4.136858   | 4.69       | 2.146386   | 5.240768   | 4.978143   | 5.413994   |
| Dendrobium_catenatum_newGene_10605 | 0.291128   | 0.446895   | 0.656717   | 0.578773   | 0.728009   | 1.024139   | 0.223816   | 0.256134   | 0.158014   |
| gene-MA16_Dca026611                | 13.739098  | 14.44604   | 12.469058  | 4.2294     | 3.754732   | 2.674953   | 1.069408   | 1.990642   | 1.880037   |
| gene-MA16_Dca014774                | 135.146545 | 138.001709 | 138.057892 | 44.672165  | 41.709671  | 43.749722  | 44.820171  | 47.765057  | 46.994049  |
| gene-MA16_Dca028858                | 15.42443   | 12.690991  | 13.636704  | 7.258853   | 5.584307   | 6.348711   | 6.229495   | 8.229973   | 5.139679   |
| Dendrobium_catenatum_newGene_1678  | 0.883632   | 0.868022   | 1.215264   | 0.891012   | 1.037133   | 0.949514   | 0.57822    | 0.426947   | 0.407932   |
| gene-MA16_Dca004902                | 4.729874   | 4.949944   | 5.291917   | 2.918422   | 2.612373   | 1.593121   | 7.781834   | 9.538604   | 11.962242  |
| Dendrobium_catenatum_newGene_7530  | 4.235168   | 3.737742   | 3.623606   | 0.622631   | 0.501298   | 0.449798   | 1.136258   | 0.973658   | 1.117273   |
| Dendrobium_catenatum_newGene_7539  | 67.967697  | 67.85791   | 66.779694  | 118.042892 | 112.742851 | 113.596275 | 193.892685 | 179.227448 | 173.005356 |
| gene-MA16_Dca007762                | 0.152026   | 0.119224   | 0.153888   | 0.591414   | 0.336746   | 0.126384   | 0.933991   | 0.573589   | 0.48302    |
| gene-MA16_Dca005692                | 0.876849   | 0.788989   | 0.730906   | 2.016078   | 1.718881   | 2.297369   | 2.877733   | 1.958287   | 3.901377   |
| gene-MA16_Dca005691                | 15.296094  | 17.108149  | 11.542382  | 0.152356   | 0          | 0.069938   | 0          | 0.292404   | 0.047835   |
| gene-MA16_Dca006411                | 1.415566   | 1.115448   | 1.277353   | 1.379526   | 1.052387   | 1.393359   | 3.974138   | 3.830385   | 4.239762   |
| Dendrobium_catenatum_newGene_15710 | 1.163664   | 1.896973   | 1.353753   | 1.282233   | 1.344615   | 1.048996   | 4.584991   | 3.17651    | 3.978228   |
| gene-MA16_Dca016849                | 29.395458  | 30.018049  | 31.120607  | 17.956488  | 15.201852  | 16.014139  | 14.58286   | 15.564003  | 14.259056  |
| gene-MA16_Dca012358                | 43.44458   | 43.953907  | 44.638386  | 16.174105  | 17.334547  | 17.284386  | 14.804284  | 16.2728    | 14.735376  |
| gene-MA16_Dca011715                | 8.231263   | 7.023738   | 7.321729   | 24.712353  | 26.476786  | 28.059401  | 25.930239  | 25.939249  | 25.517265  |
| gene-MA16_Dca016154                | 3.539206   | 4.815641   | 3.169114   | 2.085479   | 1.598498   | 2.12386    | 1.89626    | 1.841208   | 1.372356   |
| gene-MA16_Dca016157                | 120.889    | 118.772972 | 118.432549 | 67.238281  | 60.495216  | 63.388538  | 61.17939   | 56.454185  | 55.467239  |
| gene-MA16_Dca016153                | 3.726885   | 4.081433   | 2.937816   | 1.299472   | 1.667125   | 1.739159   | 1.161287   | 1.913037   | 1.651687   |
| Dendrobium_catenatum_newGene_2138  | 10.861362  | 7.949295   | 10.836549  | 1.861905   | 1.985709   | 2.365454   | 3.375598   | 1.966416   | 2.976324   |
| gene-MA16_Dca025908                | 4.632973   | 4.466069   | 4.890292   | 0.255158   | 0.154923   | 0          | 0.157982   | 0.06263    | 0.082954   |
| gene-MA16_Dca025636                | 15.387689  | 15.968266  | 18.117563  | 6.415095   | 8.882003   | 5.226068   | 9.837237   | 11.048999  | 9.768675   |
| gene-MA16_Dca025907                | 3.587887   | 4.316682   | 3.744859   | 0.069066   | 0          | 0.054037   | 0          | 0          | 0.09493    |
| gene-MA16_Dca012439                | 0.597973   | 0.338406   | 0.567835   | 0.185527   | 0.167294   | 0.078827   | 0.342523   | 0.241294   | 0.458276   |
| gene-MA16_Dca012438                | 77.047401  | 81.254509  | 75.7892    | 5.978762   | 5.322371   | 5.570034   | 5.260312   | 4.895706   | 4.495881   |

|                                    |            |            |            |            |            |            |            |            |            |
|------------------------------------|------------|------------|------------|------------|------------|------------|------------|------------|------------|
| gene-MA16_Dca022027                | 10.35713   | 9.570797   | 8.507335   | 3.755987   | 3.989825   | 3.775755   | 4.136889   | 4.184375   | 4.680912   |
| gene-MA16_Dca013385                | 2.173542   | 2.629864   | 2.79801    | 0.17931    | 0.607331   | 0.455929   | 1.022805   | 0.809379   | 0.888223   |
| gene-MA16_Dca019521                | 18.349499  | 18.405703  | 19.086794  | 12.739182  | 11.024796  | 14.016875  | 9.110688   | 8.807193   | 7.533739   |
| gene-MA16_Dca019524                | 60.390129  | 59.515312  | 56.827511  | 31.877024  | 28.141758  | 29.114813  | 28.853745  | 29.357611  | 28.532393  |
| gene-MA16_Dca025279                | 5.526198   | 4.991983   | 5.133829   | 2.856279   | 2.756653   | 2.678902   | 1.662078   | 2.079419   | 1.910683   |
| gene-MA16_Dca025274                | 2.413774   | 1.905664   | 2.530505   | 3.904409   | 3.11366    | 2.987139   | 1.134846   | 1.398556   | 0.953831   |
| gene-MA16_Dca025270                | 639.339722 | 568.458374 | 618.696594 | 629.089844 | 665.756165 | 589.556824 | 1878.23608 | 1688.95056 | 1661.20032 |
| Dendrobium_catenatum_newGene_10025 | 3.678065   | 2.760513   | 3.137186   | 4.385514   | 4.011265   | 4.060187   | 7.364214   | 6.54651    | 6.869966   |
| Dendrobium_catenatum_newGene_4205  | 6.39102    | 7.878616   | 6.640491   | 1.999585   | 2.726405   | 2.233499   | 1.68753    | 2.225151   | 2.85947    |
| gene-MA16_Dca028624                | 18.588875  | 19.256723  | 20.354866  | 3.22472    | 3.525873   | 2.848295   | 4.051547   | 1.702527   | 1.423696   |
| gene-MA16_Dca028621                | 21.309505  | 18.542301  | 21.353798  | 9.80876    | 9.265491   | 15.781193  | 8.143978   | 7.650177   | 12.206339  |
| Dendrobium_catenatum_newGene_889   | 4.37747    | 5.163588   | 4.279039   | 7.722637   | 7.295609   | 7.510952   | 10.416493  | 10.847979  | 10.675285  |
| Dendrobium_catenatum_newGene_887   | 5.371793   | 6.01774    | 6.680439   | 0          | 0.266358   | 0.046306   | 0          | 0.039322   | 0.168211   |
| gene-MA16_Dca022927                | 36.262287  | 36.963184  | 36.60656   | 69.534409  | 67.462906  | 73.518303  | 85.40271   | 82.898239  | 80.394547  |
| gene-MA16_Dca022924                | 9.86216    | 10.856565  | 9.400135   | 7.508985   | 5.389091   | 6.516451   | 3.449465   | 3.192887   | 3.874563   |
| gene-MA16_Dca008174                | 52.546871  | 56.820343  | 50.490314  | 18.050611  | 13.759575  | 15.062     | 16.956661  | 16.915075  | 16.96277   |
| gene-MA16_Dca017360                | 2.347382   | 1.553663   | 1.500795   | 4.501175   | 3.695585   | 4.667396   | 4.952361   | 4.550724   | 4.132209   |
| gene-MA16_Dca017361                | 0.322856   | 0.390143   | 0.523907   | 2.360061   | 2.749966   | 2.907334   | 1.251322   | 1.599172   | 1.398958   |
| gene-MA16_Dca017367                | 20.899267  | 21.093414  | 19.867449  | 12.391209  | 10.896165  | 8.740148   | 7.393384   | 9.392415   | 7.706702   |
| gene-MA16_Dca018357                | 46.234318  | 41.501678  | 38.455311  | 42.094063  | 44.494637  | 45.025707  | 14.08424   | 16.539669  | 14.028195  |
| gene-MA16_Dca018358                | 14.702298  | 13.667823  | 14.002548  | 1.053666   | 2.669381   | 1.955031   | 0.398528   | 0.668834   | 1.520405   |
| Dendrobium_catenatum_newGene_9637  | 179.593128 | 183.796302 | 181.002387 | 72.688952  | 70.491548  | 73.413496  | 58.165638  | 58.519594  | 61.310426  |
| Dendrobium_catenatum_newGene_9639  | 0.260349   | 0.255028   | 0.213183   | 0.593045   | 0          | 0.31166    | 2.979868   | 2.619219   | 1.966563   |
| Dendrobium_catenatum_newGene_1002  | 20.286666  | 21.701212  | 18.674401  | 46.472555  | 41.384738  | 42.546084  | 50.210266  | 49.859797  | 50.611187  |
| gene-MA16_Dca009318                | 168.04248  | 157.59816  | 173.893219 | 89.999863  | 92.401482  | 88.879166  | 65.997368  | 63.796909  | 64.439926  |
| gene-MA16_Dca008192                | 1.872798   | 2.190721   | 0.980776   | 3.499774   | 3.432729   | 3.532828   | 3.857763   | 4.055726   | 3.547289   |
| gene-MA16_Dca000063                | 69.786812  | 77.661232  | 75.017761  | 36.114658  | 33.080761  | 36.490971  | 29.235098  | 26.575771  | 26.490664  |
| gene-MA16_Dca008730                | 4.549926   | 4.017221   | 3.689789   | 0.587383   | 0.807163   | 0.76076    | 1.766302   | 2.574636   | 1.73566    |

|                                    |            |            |            |            |            |            |            |            |            |
|------------------------------------|------------|------------|------------|------------|------------|------------|------------|------------|------------|
| gene-MA16_Dca012252                | 0.028809   | 0.148503   | 0.262208   | 0          | 0.513488   | 0.201126   | 0.78043    | 0.858393   | 0.893022   |
| gene-MA16_Dca020959                | 22.727198  | 20.413992  | 17.949295  | 0.623503   | 0.525393   | 0.524159   | 2.301617   | 2.071191   | 2.428429   |
| Dendrobium_catenatum_newGene_16184 | 15.598813  | 15.751059  | 16.208878  | 3.952983   | 5.418807   | 4.18391    | 3.896749   | 3.386291   | 3.117063   |
| gene-MA16_Dca002684                | 283.12674  | 272.444977 | 248.307449 | 81.359299  | 68.996147  | 77.450401  | 43.485443  | 43.340084  | 45.969624  |
| gene-MA16_Dca013611                | 7.076376   | 8.239636   | 9.7821     | 6.55599    | 5.549066   | 4.989662   | 16.138161  | 11.361125  | 12.101573  |
| gene-MA16_Dca009454                | 317.012878 | 316.02002  | 308.744202 | 151.526871 | 149.554703 | 153.199661 | 143.615509 | 148.384705 | 146.512253 |
| gene-MA16_Dca018591                | 59.782341  | 58.579769  | 57.437397  | 7.506227   | 7.949145   | 8.818182   | 8.714964   | 9.945667   | 10.817879  |
| gene-MA16_Dca026449                | 163.560822 | 183.929047 | 181.57016  | 365.302887 | 370.35965  | 387.921753 | 608.89856  | 556.663269 | 349.136536 |
| gene-MA16_Dca026448                | 688.353333 | 628.605835 | 649.820557 | 996.219299 | 1085.87878 | 989.651611 | 1607.51819 | 1526.19885 | 1558.31177 |
| gene-MA16_Dca015611                | 284.67099  | 284.451752 | 279.118225 | 114.561745 | 104.89341  | 104.745644 | 130.435364 | 121.945457 | 124.661125 |
| gene-MA16_Dca021143                | 35.299549  | 33.150845  | 33.186729  | 22.644958  | 22.133219  | 23.297184  | 14.69898   | 15.713356  | 15.029957  |
| Dendrobium_catenatum_newGene_9036  | 4.109172   | 4.479181   | 4.939965   | 4.31373    | 4.298853   | 3.992513   | 1.780443   | 1.281257   | 1.877308   |
| gene-MA16_Dca020238                | 2.664831   | 2.435559   | 2.59434    | 0.471343   | 1.157466   | 1.069814   | 4.453519   | 5.048659   | 3.465379   |
| gene-MA16_Dca020235                | 82.104691  | 78.433601  | 79.246567  | 42.988056  | 41.668232  | 41.877644  | 54.771538  | 49.469498  | 51.61964   |
| gene-MA16_Dca020236                | 3.339237   | 2.612205   | 2.335344   | 1.028407   | 0.735537   | 0.961287   | 1.160118   | 0.965171   | 1.502484   |
| gene-MA16_Dca024843                | 3.250064   | 1.65396    | 1.845034   | 17.89707   | 20.313354  | 18.433788  | 8.057653   | 7.309334   | 9.194764   |
| gene-MA16_Dca024842                | 44.392223  | 53.449886  | 52.548153  | 1019.07575 | 999.924805 | 1014.00476 | 333.132538 | 315.432465 | 332.620972 |
| gene-MA16_Dca024841                | 81.405128  | 86.515663  | 85.024796  | 915.571655 | 869.449707 | 924.245728 | 502.910065 | 470.079865 | 486.027191 |
| gene-MA16_Dca010216                | 1.761424   | 1.626394   | 2.476319   | 0.481086   | 1.166853   | 0.69616    | 0.902888   | 1.449124   | 0.980391   |
| gene-MA16_Dca005563                | 7.278111   | 8.385379   | 8.490788   | 15.842994  | 10.248302  | 14.239746  | 66.814163  | 66.309639  | 64.254089  |
| gene-MA16_Dca006910                | 1.297557   | 0.783716   | 0.700596   | 1.340473   | 1.329926   | 1.294696   | 1.916798   | 1.939222   | 2.353184   |
| gene-MA16_Dca003244                | 57.649509  | 52.312534  | 48.933319  | 7.417403   | 7.619712   | 7.56437    | 5.551361   | 6.626226   | 6.343163   |
| gene-MA16_Dca003245                | 9.768539   | 9.505861   | 9.010056   | 0.808465   | 0.482729   | 1.005397   | 0.544219   | 0.121319   | 0.394263   |
| Dendrobium_catenatum_newGene_9772  | 0.859511   | 0.623026   | 0.494961   | 0.484464   | 1.445805   | 0.503401   | 1.809742   | 1.677702   | 1.038838   |
| gene-MA16_Dca002119                | 9.883376   | 11.364245  | 11.016594  | 2.968286   | 2.748353   | 2.259167   | 4.895849   | 6.127147   | 4.518888   |
| gene-MA16_Dca002117                | 2248.36255 | 2239.40918 | 2285.69336 | 7989.51465 | 8046.40772 | 8116.12256 | 4516.91553 | 4271.39893 | 4224.97412 |
| gene-MA16_Dca002116                | 761.484741 | 763.520752 | 751.387085 | 422.395355 | 386.553162 | 394.906677 | 743.213501 | 713.3974   | 714.883301 |
| gene-MA16_Dca002111                | 28.379333  | 29.02837   | 28.276594  | 18.961044  | 18.432255  | 21.182726  | 13.70248   | 13.69443   | 15.057064  |

|                                    |            |            |            |            |           |            |            |            |            |
|------------------------------------|------------|------------|------------|------------|-----------|------------|------------|------------|------------|
| Dendrobium_catenatum_newGene_4564  | 1.204189   | 1.096784   | 1.171881   | 1.338713   | 1.709002  | 1.923413   | 7.172501   | 6.545973   | 7.337915   |
| gene-MA16_Dca012867                | 29.438057  | 31.373371  | 30.681154  | 16.172855  | 14.900682 | 16.145092  | 15.464578  | 15.5661    | 15.729072  |
| gene-MA16_Dca024353                | 4.90718    | 6.134019   | 7.305291   | 2.150239   | 2.034614  | 2.986023   | 1.394021   | 0.920671   | 1.708479   |
| gene-MA16_Dca013809                | 7.55476    | 7.314016   | 6.425734   | 3.173485   | 2.530926  | 2.852484   | 2.770693   | 3.178694   | 2.929488   |
| gene-MA16_Dca000184                | 44.966591  | 38.549305  | 44.975212  | 68.632622  | 78.133255 | 69.175064  | 131.179688 | 140.63504  | 118.020172 |
| Dendrobium_catenatum_newGene_10687 | 9.492716   | 10.233766  | 9.865764   | 15.675495  | 15.740338 | 15.775954  | 21.191443  | 21.752169  | 19.365984  |
| gene-MA16_Dca017137                | 1.387398   | 1.095802   | 1.724079   | 0          | 0         | 0          | 0          | 0.066268   | 0.04221    |
| gene-MA16_Dca016266                | 1.17704    | 1.757428   | 1.524795   | 1.267995   | 1.044161  | 0.789455   | 0.65534    | 0.556227   | 0.495709   |
| gene-MA16_Dca002952                | 12.724582  | 12.636784  | 12.798314  | 3.209986   | 3.987442  | 3.443468   | 4.040347   | 2.750806   | 4.45908    |
| gene-MA16_Dca022514                | 15.602083  | 16.375956  | 15.609994  | 7.991724   | 8.393332  | 7.920015   | 8.245292   | 9.061617   | 8.948072   |
| gene-MA16_Dca022511                | 189.211334 | 191.462509 | 187.110733 | 193.743164 | 188.00795 | 189.198456 | 407.226379 | 401.025238 | 405.114685 |
| gene-MA16_Dca027928                | 61.560814  | 57.051121  | 54.534977  | 29.565968  | 26.669384 | 26.588758  | 115.788765 | 103.072021 | 106.86525  |
| gene-MA16_Dca015798                | 2.007143   | 1.886576   | 1.476733   | 0.560151   | 0.526299  | 0.535042   | 0.773756   | 0.411709   | 0.713131   |
| gene-MA16_Dca019230                | 14.868752  | 11.088905  | 12.137717  | 19.472643  | 20.58684  | 22.343258  | 59.712936  | 63.4837    | 55.06308   |
| gene-MA16_Dca015421                | 54.876495  | 53.167957  | 52.314278  | 25.670797  | 26.466633 | 28.179197  | 23.920851  | 21.857327  | 23.575781  |
| gene-MA16_Dca007458                | 0.33796    | 0.327137   | 0.207424   | 0.877749   | 0.388216  | 0.763848   | 1.117852   | 0.870936   | 0.438481   |
| gene-MA16_Dca001859                | 17.669708  | 16.644571  | 15.809982  | 5.201816   | 5.906356  | 7.400585   | 4.793111   | 4.162615   | 4.020805   |
| gene-MA16_Dca005345                | 5.829899   | 5.666783   | 5.683257   | 1.092399   | 1.130394  | 1.121671   | 0.831404   | 0.600235   | 0.8383     |
| gene-MA16_Dca004431                | 18.526905  | 22.199081  | 19.44809   | 41.709686  | 42.370193 | 44.104008  | 159.273407 | 135.886978 | 139.79631  |
| gene-MA16_Dca004432                | 151.09938  | 161.297913 | 155.414658 | 15.541612  | 16.156769 | 13.523287  | 16.997477  | 19.360079  | 17.332382  |
| gene-MA16_Dca008548                | 1.264775   | 2.498058   | 2.224852   | 6.003753   | 5.592531  | 6.212668   | 6.77121    | 6.247358   | 7.849539   |
| gene-MA16_Dca009967                | 87.616219  | 89.470284  | 82.36396   | 72.481354  | 70.876633 | 71.988808  | 44.165543  | 42.183945  | 40.727371  |
| gene-MA16_Dca001149                | 0.622446   | 0.670595   | 0.454385   | 0.307322   | 0.227618  | 0.447434   | 1.151855   | 1.281257   | 0.839864   |
| gene-MA16_Dca001141                | 40.931728  | 46.875027  | 44.082489  | 18.101482  | 18.428532 | 17.832891  | 12.521786  | 13.600368  | 12.063882  |
| gene-MA16_Dca000435                | 26.681141  | 27.467165  | 26.451859  | 2.366001   | 1.523732  | 1.861524   | 1.770476   | 1.21153    | 1.428188   |
| gene-MA16_Dca000437                | 6.373524   | 5.614019   | 6.64344    | 2.332354   | 1.471192  | 1.857084   | 2.029967   | 2.214851   | 2.712952   |
| gene-MA16_Dca004396                | 7.932098   | 8.961926   | 9.129307   | 1.776154   | 1.586858  | 1.808228   | 2.108654   | 2.742128   | 2.849092   |
| gene-MA16_Dca007117                | 83.328293  | 80.235283  | 86.125992  | 24.84165   | 24.012371 | 26.280005  | 35.155903  | 35.058132  | 31.376371  |

|                                   |            |            |            |            |            |            |            |            |            |
|-----------------------------------|------------|------------|------------|------------|------------|------------|------------|------------|------------|
| gene-MA16_Dca006093               | 1.62872    | 2.163366   | 1.634514   | 4.314722   | 3.86147    | 2.857189   | 4.362388   | 4.844626   | 3.373321   |
| gene-MA16_Dca022716               | 216.865036 | 185.777939 | 250.064545 | 75.896706  | 146.929626 | 80.725739  | 66.282806  | 81.964897  | 128.748749 |
| gene-MA16_Dca010979               | 55.989006  | 52.467148  | 51.458038  | 18.776865  | 18.293854  | 17.047194  | 17.25404   | 18.821201  | 18.153587  |
| gene-MA16_Dca023008               | 50.941471  | 51.178848  | 49.527702  | 9.460919   | 11.285037  | 12.398569  | 17.407053  | 14.907177  | 16.149088  |
| gene-MA16_Dca009626               | 7.870553   | 8.821346   | 9.758762   | 15.955495  | 14.277619  | 14.702103  | 20.596443  | 21.539013  | 18.536707  |
| gene-MA16_Dca009625               | 51.189274  | 39.005535  | 41.362591  | 11.120946  | 9.132043   | 13.266481  | 9.888457   | 6.970408   | 8.403711   |
| gene-MA16_Dca022758               | 579.724731 | 415.965179 | 469.948486 | 155.7173   | 293.077362 | 150.618805 | 201.469543 | 218.148148 | 238.182114 |
| gene-MA16_Dca026233               | 0.696936   | 0.471507   | 0.614958   | 1.67728    | 1.182413   | 1.484792   | 4.153913   | 4.096552   | 3.450932   |
| gene-MA16_Dca028586               | 73.004196  | 70.777679  | 68.457954  | 20.715008  | 20.025692  | 22.29957   | 10.86929   | 10.626613  | 10.797009  |
| gene-MA16_Dca009088               | 96.396225  | 92.633751  | 90.952065  | 2.362126   | 2.121613   | 1.707542   | 3.725433   | 2.881732   | 4.308283   |
| gene-MA16_Dca013307               | 25.300512  | 26.049625  | 25.947285  | 13.709448  | 14.946414  | 14.649076  | 12.791975  | 12.654753  | 12.965795  |
| gene-MA16_Dca024494               | 325.769257 | 313.76239  | 330.391815 | 636.940796 | 609.531616 | 649.155212 | 799.764221 | 805.045654 | 768.717773 |
| gene-MA16_Dca024147               | 16.101934  | 18.573372  | 20.653774  | 0.088538   | 0          | 0.111342   | 0          | 0.137313   | 0          |
| Dendrobium_catenatum_newGene_4289 | 128.712555 | 129.010757 | 131.285431 | 63.793678  | 57.479412  | 65.369698  | 61.014061  | 62.199932  | 58.039898  |
| gene-MA16_Dca021517               | 8.381831   | 7.434552   | 8.98803    | 4.112024   | 3.659143   | 4.341859   | 3.780957   | 2.102126   | 4.825107   |
| gene-MA16_Dca021512               | 1.334582   | 0.973807   | 0.695299   | 0.179064   | 0.143406   | 0          | 0.150836   | 0.230302   | 0.276887   |
| gene-MA16_Dca021513               | 43.993347  | 43.856503  | 40.812592  | 7.134118   | 5.389328   | 6.391262   | 8.05174    | 7.574512   | 6.319701   |
| gene-MA16_Dca020642               | 11.778464  | 12.887647  | 14.791131  | 6.610072   | 7.203482   | 6.104241   | 8.630761   | 7.107518   | 7.007949   |
| gene-MA16_Dca015913               | 16.87524   | 19.231932  | 18.944441  | 22.233471  | 21.17231   | 21.477812  | 39.852272  | 42.151413  | 42.699764  |
| gene-MA16_Dca011217               | 2.710239   | 3.645741   | 3.204237   | 0.97204    | 1.629382   | 0.921241   | 7.256414   | 4.091116   | 3.360826   |
| gene-MA16_Dca015042               | 3.275383   | 4.847236   | 5.207634   | 0.401114   | 0.791478   | 0.675308   | 0          | 0          | 0          |
| Dendrobium_catenatum_newGene_8768 | 2.471441   | 3.661113   | 4.008429   | 4.784127   | 4.814091   | 4.804102   | 6.301084   | 7.322109   | 8.382092   |
| gene-MA16_Dca009676               | 26.266685  | 27.918978  | 31.114935  | 14.849768  | 15.871213  | 16.962385  | 13.349491  | 12.203011  | 10.537034  |
| gene-MA16_Dca014635               | 43.151493  | 41.354935  | 43.766205  | 5.03699    | 6.116547   | 6.118857   | 6.875182   | 8.060565   | 8.148364   |
| gene-MA16_Dca019009               | 5.052459   | 5.724584   | 5.523653   | 3.432739   | 3.278935   | 2.699317   | 2.497822   | 1.876614   | 2.725202   |
| gene-MA16_Dca019007               | 509.56842  | 525.605103 | 514.548645 | 185.084259 | 183.122543 | 193.699493 | 224.213577 | 221.975037 | 209.433121 |
| gene-MA16_Dca019000               | 1.45984    | 1.273926   | 1.537793   | 0.198981   | 0.353797   | 0.569539   | 0.532463   | 0.530869   | 0.477911   |
| gene-MA16_Dca021257               | 799.757568 | 743.144287 | 723.094727 | 278.672028 | 275.413086 | 270.185486 | 290.800323 | 267.279144 | 289.552917 |

|                                    |            |            |            |            |            |            |            |            |            |
|------------------------------------|------------|------------|------------|------------|------------|------------|------------|------------|------------|
| gene-MA16_Dca007396                | 1.864964   | 1.37688    | 1.720989   | 1.987057   | 2.086009   | 3.04091    | 4.975827   | 4.4071     | 4.468592   |
| gene-MA16_Dca007391                | 2.313573   | 2.144801   | 1.702855   | 2.524399   | 1.782888   | 1.903868   | 4.5645     | 4.744792   | 4.546991   |
| gene-MA16_Dca003556                | 324.529846 | 310.062042 | 300.581451 | 154.601486 | 154.62561  | 159.314545 | 143.092194 | 152.769714 | 137.947418 |
| gene-MA16_Dca013563                | 78.585068  | 79.626999  | 75.26902   | 14.166872  | 15.516563  | 14.300761  | 15.355875  | 17.208317  | 13.475904  |
| gene-MA16_Dca013696                | 10.505224  | 9.174061   | 10.146747  | 20.493528  | 20.136368  | 18.29948   | 22.523268  | 24.966112  | 23.862707  |
| gene-MA16_Dca013697                | 5.118442   | 5.483164   | 4.635119   | 2.113233   | 2.253461   | 1.880378   | 1.736055   | 1.363536   | 1.591976   |
| gene-MA16_Dca002608                | 47.278603  | 53.447273  | 44.601864  | 36.184502  | 36.283852  | 34.724823  | 20.31192   | 18.158201  | 19.226418  |
| Dendrobium_catenatum_newGene_12565 | 6.838853   | 6.270065   | 6.516284   | 8.265536   | 8.001523   | 6.513546   | 2.893314   | 3.979415   | 2.444096   |
| gene-MA16_Dca023635                | 20.558739  | 18.16312   | 24.831902  | 14.145339  | 12.268302  | 11.695053  | 8.129741   | 7.405513   | 8.10978    |
| gene-MA16_Dca016052                | 1.19556    | 1.594671   | 1.49146    | 0.365044   | 0.197662   | 0.438607   | 0.816879   | 0.629455   | 0.993469   |
| gene-MA16_Dca016055                | 14.271811  | 13.77172   | 17.385717  | 7.503124   | 6.06938    | 6.948545   | 4.68551    | 5.438092   | 4.517984   |
| Dendrobium_catenatum_newGene_5600  | 18.033207  | 16.174629  | 15.766496  | 34.882137  | 31.143015  | 37.680202  | 48.00589   | 42.151333  | 39.8848    |
| gene-MA16_Dca026379                | 3.717513   | 4.456403   | 4.341981   | 3.70254    | 3.970707   | 4.937324   | 1.999035   | 2.124378   | 1.770013   |
| gene-MA16_Dca018514                | 14.591569  | 15.172183  | 16.386606  | 15.298521  | 13.80122   | 16.108414  | 115.034271 | 112.579796 | 114.35833  |
| gene-MA16_Dca018511                | 1085.3075  | 1080.4978  | 1073.87817 | 1409.89172 | 1339.0083  | 1394.18982 | 439.071381 | 406.997009 | 412.175079 |
| gene-MA16_Dca024845                | 15.569251  | 14.79094   | 16.078329  | 346.678864 | 332.304626 | 345.18811  | 669.190247 | 666.895386 | 647.01123  |
| gene-MA16_Dca024844                | 5.695525   | 6.237831   | 4.267872   | 82.638641  | 88.406433  | 87.955048  | 37.319447  | 32.935696  | 34.2248    |
| Dendrobium_catenatum_newGene_2927  | 2.198256   | 1.785608   | 1.95841    | 5.526087   | 6.079726   | 3.57045    | 6.217212   | 5.88427    | 7.167745   |
| gene-MA16_Dca024840                | 3.811192   | 3.915941   | 3.308029   | 12.138209  | 9.13656    | 12.21249   | 10.234471  | 11.757822  | 10.820519  |
| Dendrobium_catenatum_newGene_2929  | 0.296411   | 0.467117   | 0.347228   | 0.999979   | 0.477834   | 0.549783   | 1.353667   | 1.105314   | 0.841469   |
| Dendrobium_catenatum_newGene_4565  | 8.831493   | 8.658171   | 9.181239   | 6.787578   | 7.813738   | 7.634205   | 19.162493  | 15.699656  | 15.941949  |
| Dendrobium_catenatum_newGene_3789  | 0.277757   | 0.477224   | 0.425861   | 0.517068   | 0.850378   | 1.142481   | 0.743823   | 1.013493   | 1.097208   |
| gene-MA16_Dca027762                | 40.867386  | 45.116722  | 39.855824  | 22.094994  | 25.747818  | 21.039978  | 19.163076  | 19.003691  | 15.519191  |
| gene-MA16_Dca009576                | 1.826924   | 1.747679   | 1.207554   | 0.751331   | 0.296059   | 0.67575    | 0.754012   | 0.620094   | 0.758861   |
| gene-MA16_Dca025854                | 69.729179  | 63.910931  | 60.068237  | 70.337616  | 65.745193  | 69.429977  | 186.133133 | 175.440704 | 180.954727 |
| Dendrobium_catenatum_newGene_16542 | 24.013045  | 25.447185  | 26.498519  | 13.132363  | 10.709232  | 13.307256  | 10.533019  | 10.662296  | 10.624604  |
| gene-MA16_Dca018250                | 2.928482   | 3.432815   | 3.529538   | 2.963489   | 2.415319   | 2.835265   | 1.428556   | 1.820108   | 1.581199   |
| gene-MA16_Dca006997                | 202.385178 | 193.152573 | 215.199448 | 115.376968 | 109.098434 | 133.219101 | 111.160095 | 103.00663  | 99.090996  |

|                                    |            |            |            |            |            |            |            |            |            |
|------------------------------------|------------|------------|------------|------------|------------|------------|------------|------------|------------|
| gene-MA16_Dca012497                | 15.879473  | 14.716883  | 17.936291  | 4.731067   | 4.532359   | 4.259459   | 6.412137   | 5.349978   | 4.054964   |
| Dendrobium_catenatum_newGene_1294  | 6.728026   | 7.772243   | 5.260551   | 1.493734   | 2.513543   | 1.571069   | 1.916259   | 2.905178   | 1.884997   |
| gene-MA16_Dca003826                | 39.519474  | 40.652225  | 40.288563  | 17.99971   | 18.017395  | 19.608938  | 21.196064  | 22.337046  | 21.123274  |
| gene-MA16_Dca003827                | 0          | 0          | 0.044955   | 0.209984   | 1.980718   | 0.98083    | 1.367558   | 1.780091   | 2.514826   |
| gene-MA16_Dca003824                | 76.560814  | 72.669037  | 77.356819  | 130.797165 | 121.791473 | 125.308571 | 158.102905 | 166.982254 | 167.360916 |
| gene-MA16_Dca003829                | 0.613726   | 0.638708   | 0.561556   | 14.734691  | 14.012338  | 12.859087  | 30.788788  | 27.07048   | 24.570436  |
| gene-MA16_Dca002883                | 9.642774   | 8.607979   | 8.49446    | 5.484344   | 2.847282   | 3.29313    | 5.487177   | 5.691369   | 6.624057   |
| gene-MA16_Dca000105                | 27.516665  | 31.58021   | 31.835222  | 10.627368  | 10.433489  | 10.725863  | 9.031592   | 9.979411   | 9.151418   |
| gene-MA16_Dca000100                | 0.579427   | 0.573191   | 0.463699   | 0.813906   | 0.760441   | 1.091256   | 2.336617   | 1.767635   | 2.406955   |
| gene-MA16_Dca010281                | 53.206398  | 54.721203  | 51.136059  | 13.367549  | 13.225926  | 12.921165  | 12.695291  | 12.50738   | 12.934619  |
| gene-MA16_Dca016938                | 4.499321   | 4.543969   | 3.931313   | 0.303167   | 0.670338   | 0.391733   | 0.689766   | 0.826827   | 1.488235   |
| gene-MA16_Dca011622                | 62.905033  | 60.45507   | 61.107216  | 3.292848   | 4.07841    | 3.207871   | 1.890469   | 0.488661   | 0.496036   |
| gene-MA16_Dca000816                | 1.143163   | 1.623115   | 0.512417   | 2.609667   | 1.48219    | 2.839511   | 4.806463   | 3.335221   | 3.534017   |
| gene-MA16_Dca022593                | 8.581537   | 8.099628   | 7.764798   | 1.093735   | 0.648373   | 0.523422   | 2.578382   | 2.9724     | 2.89416    |
| gene-MA16_Dca022599                | 6.53464    | 7.059275   | 7.474987   | 1.946692   | 1.469669   | 1.968      | 4.566575   | 4.049447   | 4.136096   |
| Dendrobium_catenatum_newGene_12068 | 1.047974   | 1.533668   | 1.386658   | 0.4195     | 0.334484   | 0.388      | 0.225932   | 0.378992   | 0.154864   |
| gene-MA16_Dca022338                | 27.790667  | 25.854513  | 26.435928  | 10.858837  | 9.463351   | 10.601808  | 12.276508  | 11.59017   | 10.780439  |
| gene-MA16_Dca026650                | 22.133236  | 21.1814    | 21.538052  | 11.404962  | 8.393158   | 12.543717  | 7.104167   | 4.53934    | 3.57227    |
| gene-MA16_Dca026652                | 11.995856  | 12.26125   | 13.710601  | 10.491584  | 7.70163    | 10.000286  | 3.992433   | 3.878685   | 5.547757   |
| gene-MA16_Dca024653                | 237.493454 | 228.649368 | 241.419464 | 542.938843 | 577.43988  | 540.576843 | 450.699951 | 431.752472 | 406.90271  |
| gene-MA16_Dca025302                | 6.200138   | 8.994379   | 9.162866   | 7.728559   | 7.218477   | 6.558284   | 2.207942   | 2.505981   | 1.162216   |
| Dendrobium_catenatum_newGene_13825 | 2.233135   | 2.385628   | 1.821452   | 1.413598   | 1.500741   | 2.90543    | 5.752935   | 5.172676   | 6.073723   |
| gene-MA16_Dca020087                | 175.68042  | 180.304016 | 174.448715 | 97.737656  | 86.201355  | 98.945122  | 93.380959  | 89.399323  | 91.708275  |
| gene-MA16_Dca016577                | 18.355797  | 19.390148  | 20.711863  | 5.48349    | 7.821399   | 6.524592   | 7.896045   | 5.626658   | 6.738477   |
| Dendrobium_catenatum_newGene_11301 | 6.348112   | 5.583468   | 5.945756   | 4.816567   | 3.635949   | 4.070943   | 2.922519   | 3.248134   | 2.74018    |
| gene-MA16_Dca006766                | 3.816727   | 5.678317   | 3.160781   | 2.446199   | 2.030532   | 1.558217   | 0.868122   | 1.376513   | 1.798672   |
| Dendrobium_catenatum_newGene_6252  | 1.791716   | 1.617298   | 2.255749   | 1.258778   | 1.244969   | 1.22624    | 0.75424    | 0.586505   | 1.101099   |
| gene-MA16_Dca001233                | 6.17615    | 6.098877   | 7.087122   | 12.837944  | 13.324347  | 12.602096  | 20.155054  | 19.659151  | 19.113047  |

|                                   |            |            |            |            |            |            |            |            |            |
|-----------------------------------|------------|------------|------------|------------|------------|------------|------------|------------|------------|
| gene-MA16_Dca005447               | 1.816671   | 1.876382   | 1.217305   | 2.799455   | 2.559208   | 2.013505   | 1.319309   | 0.508994   | 0.796197   |
| gene-MA16_Dca023293               | 29.680107  | 37.152477  | 32.941963  | 3.178392   | 3.369112   | 2.530227   | 3.70372    | 4.323377   | 1.824064   |
| Dendrobium_catenatum_newGene_1825 | 2.013352   | 2.764958   | 2.03583    | 1.449888   | 1.401269   | 1.583495   | 0.82293    | 1.10424    | 1.132967   |
| Dendrobium_catenatum_newGene_5341 | 1.206285   | 0.543322   | 0.771617   | 0.663278   | 0.547607   | 0.597421   | 0.356126   | 0.117867   | 0.366135   |
| gene-MA16_Dca009119               | 0.560381   | 0.286579   | 0.468741   | 1.810246   | 1.966963   | 1.836096   | 2.654477   | 1.822141   | 2.492163   |
| gene-MA16_Dca004317               | 0.770203   | 1.129984   | 0.584892   | 1.006149   | 0.688352   | 1.44748    | 2.205545   | 2.200075   | 2.467314   |
| gene-MA16_Dca004316               | 18.693951  | 15.618731  | 21.261517  | 1.245287   | 1.433724   | 0.96401    | 1.271193   | 1.188203   | 1.28028    |
| gene-MA16_Dca004310               | 25.778862  | 20.654041  | 19.555073  | 5.194879   | 9.235003   | 4.915403   | 3.960869   | 2.811797   | 2.539364   |
| gene-MA16_Dca007156               | 5.720437   | 5.610405   | 5.646885   | 8.711428   | 7.541656   | 9.452868   | 14.518107  | 12.493814  | 13.144242  |
| gene-MA16_Dca007158               | 1.566452   | 1.023474   | 0.893923   | 3.211398   | 3.363997   | 2.247025   | 3.421408   | 4.771733   | 3.713201   |
| Dendrobium_catenatum_newGene_2753 | 0.43902    | 0.367163   | 0.539074   | 1.784274   | 0.629851   | 1.514975   | 2.773233   | 3.016429   | 2.332418   |
| gene-MA16_Dca006200               | 3.471521   | 5.214526   | 4.316084   | 13.8037    | 12.239185  | 12.605894  | 13.844482  | 14.063803  | 14.808652  |
| gene-MA16_Dca003665               | 57.894608  | 57.490623  | 55.788956  | 24.883526  | 25.170572  | 21.978453  | 46.484921  | 44.653786  | 44.215973  |
| gene-MA16_Dca024412               | 7.629958   | 9.976424   | 9.247668   | 3.145154   | 3.82037    | 5.017191   | 5.217996   | 7.229908   | 5.924466   |
| gene-MA16_Dca015992               | 18.107443  | 15.738199  | 18.905001  | 7.778274   | 8.487083   | 6.560578   | 10.411462  | 9.193747   | 10.430555  |
| gene-MA16_Dca016746               | 0.161113   | 0.342096   | 1.004736   | 2.508163   | 2.870961   | 2.833326   | 4.117967   | 3.938691   | 4.565256   |
| gene-MA16_Dca027809               | 7.101899   | 4.647366   | 3.343292   | 1.759872   | 2.504289   | 1.294596   | 0.497024   | 1.134447   | 1.894847   |
| gene-MA16_Dca017908               | 5.19626    | 4.938547   | 6.3793     | 27.849781  | 26.876701  | 25.416641  | 29.079979  | 29.918377  | 29.524368  |
| gene-MA16_Dca018689               | 24.866535  | 28.079018  | 23.344753  | 7.250091   | 8.251784   | 5.379663   | 7.134162   | 7.387622   | 6.546313   |
| gene-MA16_Dca018685               | 2.515038   | 2.785519   | 1.299906   | 0          | 0          | 0          | 0.131466   | 0          | 0          |
| Dendrobium_catenatum_newGene_8456 | 0.039466   | 0.967399   | 0.434786   | 0.107514   | 0          | 0          | 0.846728   | 0.902824   | 0.858344   |
| gene-MA16_Dca006010               | 7.185965   | 8.43198    | 7.948497   | 3.505224   | 2.981915   | 2.616724   | 2.298944   | 2.156474   | 1.84738    |
| gene-MA16_Dca021214               | 51.688934  | 48.052834  | 49.4506    | 0.715632   | 1.199944   | 1.765598   | 0.70939    | 1.009675   | 1.311932   |
| gene-MA16_Dca005222               | 190.617783 | 188.357162 | 184.796127 | 122.928078 | 116.606865 | 122.564529 | 85.785965  | 87.790474  | 85.394417  |
| gene-MA16_Dca005220               | 2.741686   | 2.990683   | 2.792763   | 3.005922   | 2.287432   | 2.499379   | 0.791372   | 0.771888   | 0.312579   |
| gene-MA16_Dca004576               | 100.738937 | 99.258636  | 100.569199 | 173.33606  | 177.097626 | 164.197433 | 231.228668 | 230.268143 | 219.487885 |
| gene-MA16_Dca004571               | 7.874555   | 6.969589   | 7.190839   | 4.768365   | 4.16749    | 3.274766   | 3.146671   | 2.721324   | 4.295318   |
| gene-MA16_Dca004572               | 72.139595  | 70.792221  | 75.144058  | 40.27063   | 42.418652  | 38.23283   | 37.05275   | 32.836308  | 30.361582  |



|                                    |            |            |            |            |            |            |            |            |            |
|------------------------------------|------------|------------|------------|------------|------------|------------|------------|------------|------------|
| gene-MA16_Dca008223                | 17.695827  | 16.557188  | 16.200962  | 9.633821   | 9.50715    | 8.878436   | 8.860125   | 8.619113   | 8.809106   |
| gene-MA16_Dca008222                | 318.758148 | 314.947662 | 317.585144 | 152.903046 | 151.898132 | 155.47525  | 114.053085 | 115.347618 | 120.793449 |
| gene-MA16_Dca007882                | 1.836611   | 1.751959   | 1.949796   | 5.234709   | 4.855471   | 5.597533   | 1.919192   | 1.848455   | 2.272771   |
| gene-MA16_Dca005768                | 6.18483    | 7.269962   | 5.729276   | 10.989459  | 9.507553   | 9.52028    | 16.241068  | 15.948064  | 14.360788  |
| gene-MA16_Dca013713                | 5.33192    | 5.195023   | 4.907655   | 3.273017   | 2.80457    | 3.321545   | 2.376725   | 2.385684   | 2.45218    |
| gene-MA16_Dca013712                | 164.403442 | 153.71196  | 155.881699 | 100.006561 | 91.518509  | 97.411049  | 442.706177 | 412.789825 | 409.453094 |
| gene-MA16_Dca013716                | 137.428116 | 139.423233 | 134.7995   | 101.995544 | 100.988457 | 101.583649 | 57.9473    | 58.346752  | 60.842384  |
| gene-MA16_Dca016508                | 0.649422   | 0.380185   | 0.736214   | 0.110672   | 0.152138   | 0.135381   | 1.910869   | 0.933398   | 1.448165   |
| gene-MA16_Dca010831                | 424.054596 | 409.738983 | 413.686584 | 252.613846 | 241.846085 | 240.172256 | 121.951172 | 115.69075  | 112.021286 |
| gene-MA16_Dca003338                | 4.648052   | 5.245437   | 4.785493   | 2.898873   | 2.639413   | 2.089743   | 2.575696   | 2.554744   | 2.409849   |
| Dendrobium_catenatum_newGene_7683  | 1.722134   | 1.956934   | 1.972831   | 1.78996    | 1.673737   | 1.832544   | 0.993584   | 0.916313   | 0.578857   |
| gene-MA16_Dca007053                | 1.789013   | 1.496609   | 1.971195   | 0.242593   | 0.293446   | 0.204305   | 0.404119   | 0.123233   | 0.275297   |
| gene-MA16_Dca025643                | 2.317616   | 1.052367   | 3.480679   | 6.789807   | 7.580373   | 8.068462   | 4.599611   | 4.50121    | 2.705743   |
| gene-MA16_Dca005963                | 3.260448   | 2.389929   | 2.010797   | 4.89612    | 5.219667   | 4.601685   | 6.62396    | 6.318089   | 5.876378   |
| Dendrobium_catenatum_newGene_16954 | 4.067101   | 4.676755   | 4.582892   | 1.592481   | 1.331619   | 1.696702   | 1.715521   | 1.703389   | 2.040122   |
| gene-MA16_Dca006085                | 19.132357  | 16.236225  | 16.656496  | 3.166394   | 5.134775   | 3.167912   | 5.815489   | 4.868176   | 5.466569   |
| gene-MA16_Dca002419                | 30.327108  | 30.092245  | 30.815182  | 19.248068  | 19.567276  | 22.747498  | 48.863964  | 49.068665  | 48.059532  |
| gene-MA16_Dca011318                | 1.718005   | 2.199162   | 2.069732   | 1.487861   | 1.109667   | 1.128648   | 0.541667   | 0.936712   | 0.810323   |
| gene-MA16_Dca011317                | 78.355713  | 78.230797  | 67.471855  | 21.536955  | 23.651567  | 19.847675  | 16.254229  | 15.569936  | 18.202993  |
| gene-MA16_Dca025395                | 9.692465   | 11.659103  | 9.975366   | 17.449045  | 16.777885  | 19.948645  | 21.093004  | 25.178612  | 25.430943  |
| gene-MA16_Dca020455                | 74.562004  | 79.548012  | 78.054031  | 13.175419  | 15.163401  | 11.759256  | 10.98598   | 12.381409  | 13.136541  |
| gene-MA16_Dca000522                | 29.043489  | 28.54862   | 31.585443  | 15.331864  | 16.574234  | 18.128302  | 9.169445   | 7.020255   | 8.775      |
| gene-MA16_Dca023375                | 8.566407   | 9.49114    | 8.536954   | 40.510811  | 38.979694  | 41.522396  | 3.574712   | 2.876042   | 2.477712   |
| gene-MA16_Dca023372                | 41.130989  | 39.864071  | 43.450645  | 22.58774   | 22.568443  | 24.30349   | 20.9795    | 21.181379  | 19.371805  |
| gene-MA16_Dca019462                | 43.103024  | 44.322128  | 46.768856  | 6.068097   | 7.09779    | 6.895698   | 6.574896   | 6.447721   | 5.895909   |
| gene-MA16_Dca027003                | 5.58817    | 3.8628     | 4.178169   | 3.952625   | 2.842047   | 2.683222   | 1.132021   | 2.145685   | 1.076949   |
| gene-MA16_Dca001926                | 36.380661  | 32.99144   | 32.845203  | 99.631073  | 94.981285  | 99.080833  | 242.137634 | 252.146835 | 251.521957 |
| gene-MA16_Dca015713                | 177.766647 | 189.181854 | 200.044952 | 68.810097  | 64.767647  | 65.707024  | 55.91317   | 48.687401  | 48.895081  |

|                                    |            |            |            |           |           |           |           |           |           |
|------------------------------------|------------|------------|------------|-----------|-----------|-----------|-----------|-----------|-----------|
| Dendrobium_catenatum_newGene_3857  | 0.070946   | 0.035546   | 0          | 0.161653  | 0.226654  | 0.37171   | 1.021953  | 1.713397  | 0.726508  |
| gene-MA16_Dca011159                | 0.4345     | 0.50976    | 0.858773   | 1.659643  | 1.468723  | 1.375637  | 1.031773  | 0.966526  | 1.337017  |
| Dendrobium_catenatum_newGene_4854  | 4.29306    | 2.551607   | 2.74058    | 11.396259 | 13.642297 | 13.567654 | 11.131685 | 13.889419 | 7.46627   |
| gene-MA16_Dca000720                | 6.661032   | 6.50529    | 6.170032   | 12.639151 | 11.542398 | 12.001639 | 23.367041 | 24.006191 | 22.400175 |
| gene-MA16_Dca000722                | 7.908812   | 8.256708   | 7.50102    | 3.978365  | 4.180795  | 4.769207  | 1.805268  | 1.527456  | 2.154723  |
| gene-MA16_Dca000724                | 1.337476   | 1.901069   | 1.421621   | 0         | 0.035812  | 0         | 0         | 0.07563   | 0.215071  |
| gene-MA16_Dca000725                | 3.898964   | 4.923995   | 3.396557   | 0         | 0.037285  | 0         | 0.345581  | 0.322319  | 0.321637  |
| gene-MA16_Dca002767                | 11.096375  | 11.932055  | 12.872795  | 7.043096  | 7.359162  | 7.644426  | 5.346391  | 6.208653  | 6.466577  |
| gene-MA16_Dca000897                | 112.989021 | 105.603645 | 112.951477 | 63.152592 | 63.090942 | 61.49802  | 35.730801 | 37.487579 | 36.86602  |
| Dendrobium_catenatum_newGene_16445 | 2.969597   | 3.308268   | 3.496108   | 7.086504  | 7.333238  | 7.066489  | 9.657478  | 8.94268   | 7.495222  |
| gene-MA16_Dca023179                | 0.72713    | 0.808884   | 0.74103    | 2.753087  | 1.848308  | 1.771636  | 1.631819  | 1.292464  | 1.009867  |
| gene-MA16_Dca009712                | 59.772198  | 56.589893  | 51.003063  | 31.750561 | 33.759079 | 34.552597 | 26.169718 | 26.628099 | 23.612589 |
| gene-MA16_Dca009716                | 23.295843  | 20.932386  | 23.06498   | 13.319785 | 9.803425  | 12.893341 | 10.000221 | 12.236505 | 9.649907  |
| gene-MA16_Dca009717                | 9.597166   | 7.887527   | 7.623809   | 9.645672  | 7.813327  | 7.667998  | 18.509029 | 15.103137 | 19.076035 |
| gene-MA16_Dca009718                | 128.841248 | 132.67334  | 127.333389 | 57.429726 | 53.431316 | 58.206596 | 51.839622 | 52.33873  | 53.308842 |
| gene-MA16_Dca012544                | 0.186319   | 0.277267   | 0.154534   | 0.473013  | 0.444634  | 0.741552  | 0.661769  | 1.231167  | 0.739746  |
| gene-MA16_Dca028479                | 16.396997  | 17.950006  | 16.520584  | 14.426555 | 13.270033 | 11.931519 | 5.694024  | 4.442978  | 5.491006  |
| gene-MA16_Dca024960                | 10.743181  | 10.232554  | 9.594213   | 8.637953  | 9.345558  | 7.834466  | 4.587849  | 4.105734  | 3.565906  |
| gene-MA16_Dca014886                | 7.702411   | 6.217975   | 5.440611   | 10.219008 | 9.742972  | 8.058379  | 18.556688 | 15.2178   | 16.234554 |
| gene-MA16_Dca019453                | 11.373598  | 15.389397  | 13.992407  | 1.552913  | 1.256587  | 2.332868  | 2.301995  | 3.448083  | 2.923793  |
| gene-MA16_Dca021603                | 6.644184   | 6.347311   | 6.523833   | 4.199536  | 5.273847  | 4.203768  | 10.829589 | 8.271492  | 9.669337  |
| gene-MA16_Dca024035                | 114.274956 | 115.05024  | 115.839722 | 73.543571 | 73.613228 | 71.861115 | 54.833794 | 55.302444 | 53.743992 |
| gene-MA16_Dca018174                | 102.205238 | 111.03627  | 110.810425 | 43.220413 | 42.870457 | 41.013931 | 51.556564 | 53.385586 | 46.177509 |
| gene-MA16_Dca018198                | 73.386765  | 73.8078    | 73.070145  | 19.267628 | 18.652367 | 21.490213 | 8.575262  | 7.13276   | 4.744722  |
| Dendrobium_catenatum_newGene_11257 | 24.723553  | 22.383507  | 24.003122  | 0.203108  | 0.455516  | 0.3309    | 0.668252  | 0.266436  | 0.463821  |
| gene-MA16_Dca014747                | 342.373596 | 320.352661 | 322.39621  | 5.33469   | 8.240319  | 5.989715  | 4.950488  | 5.924708  | 5.788403  |
| gene-MA16_Dca014746                | 18.60132   | 22.450647  | 19.379089  | 29.516493 | 31.804119 | 29.489456 | 69.137817 | 61.578175 | 61.841816 |
| gene-MA16_Dca014748                | 1.504748   | 1.588155   | 1.381323   | 0.602572  | 0.827566  | 1.4818    | 0.509733  | 0.661746  | 0.721557  |

|                                    |            |            |            |            |            |            |            |            |            |
|------------------------------------|------------|------------|------------|------------|------------|------------|------------|------------|------------|
| gene-MA16_Dca019716                | 118.544136 | 118.437637 | 124.990257 | 93.735359  | 88.733597  | 97.12851   | 204.710526 | 192.666245 | 210.220123 |
| gene-MA16_Dca019718                | 115.763748 | 107.759491 | 111.497536 | 144.989334 | 140.238785 | 148.852707 | 245.643509 | 237.0905   | 239.792816 |
| gene-MA16_Dca006284                | 4.808107   | 6.070931   | 5.07235    | 0.674104   | 0.29356    | 0.257321   | 0.850599   | 0.46006    | 0.398993   |
| gene-MA16_Dca001882                | 1.338828   | 0.339185   | 0.538399   | 0.635823   | 0.876743   | 0.799961   | 1.893691   | 2.192811   | 2.639087   |
| gene-MA16_Dca005399                | 1.133272   | 1.153597   | 1.105673   | 4.142953   | 4.868181   | 4.137031   | 14.559745  | 12.593588  | 12.59707   |
| gene-MA16_Dca013968                | 3.216265   | 3.537636   | 3.188574   | 5.241879   | 4.395845   | 5.972567   | 8.063812   | 8.88502    | 9.493219   |
| gene-MA16_Dca004110                | 14.119277  | 15.83263   | 13.358296  | 25.684311  | 22.559473  | 26.476753  | 30.988153  | 30.116777  | 30.20042   |
| gene-MA16_Dca008646                | 3.265765   | 2.96693    | 3.696055   | 5.457443   | 5.542625   | 6.529773   | 7.700029   | 7.587582   | 7.573382   |
| gene-MA16_Dca004118                | 13.216917  | 13.139786  | 11.627232  | 4.696241   | 4.274131   | 4.1122     | 3.958335   | 4.874467   | 5.622451   |
| gene-MA16_Dca012363                | 5.731395   | 6.011294   | 5.120894   | 12.127723  | 11.405343  | 14.316603  | 14.176091  | 14.12318   | 12.32502   |
| gene-MA16_Dca000910                | 316.907654 | 322.217621 | 323.907867 | 216.023987 | 215.298859 | 219.147034 | 131.11528  | 121.350533 | 122.877869 |
| gene-MA16_Dca011477                | 9.482707   | 5.972261   | 6.545438   | 11.760933  | 17.285242  | 13.620538  | 17.138668  | 19.528063  | 13.072637  |
| gene-MA16_Dca012265                | 36.15377   | 34.50668   | 36.14563   | 22.641848  | 22.734282  | 24.973749  | 17.851889  | 18.856567  | 17.636242  |
| gene-MA16_Dca009695                | 3.595817   | 2.926666   | 3.577004   | 3.445851   | 2.708438   | 3.947601   | 0.408621   | 0.736599   | 0.593683   |
| gene-MA16_Dca009693                | 35.088089  | 47.085556  | 47.996277  | 48.435349  | 49.476345  | 48.888172  | 151.250931 | 154.893509 | 151.488434 |
| gene-MA16_Dca002511                | 13.744544  | 14.249167  | 13.864191  | 20.026932  | 21.488892  | 23.931845  | 32.410439  | 27.540661  | 28.172693  |
| gene-MA16_Dca002515                | 9.294312   | 7.161649   | 7.000956   | 26.319094  | 34.779484  | 20.388388  | 25.433466  | 26.371691  | 30.949352  |
| gene-MA16_Dca002514                | 5.670595   | 6.321491   | 6.127721   | 10.045634  | 9.744473   | 8.118229   | 15.072427  | 16.879883  | 15.648076  |
| gene-MA16_Dca010981                | 39.549313  | 41.753704  | 47.420284  | 22.505033  | 21.003593  | 18.93      | 23.230104  | 20.354303  | 20.896919  |
| gene-MA16_Dca010982                | 40.439304  | 36.987629  | 38.690907  | 14.946389  | 11.895359  | 12.792274  | 11.374117  | 11.420538  | 11.147508  |
| gene-MA16_Dca024547                | 3.295759   | 3.103278   | 3.238928   | 4.570189   | 4.719499   | 3.610363   | 9.380632   | 6.727753   | 5.704516   |
| gene-MA16_Dca026284                | 0.318417   | 0.173722   | 0.597314   | 1.688964   | 1.264827   | 0.853869   | 1.633985   | 2.099056   | 2.370842   |
| gene-MA16_Dca022076                | 6723.18359 | 6568.07861 | 5660.91797 | 2857.44873 | 3469.53784 | 2888.05713 | 3613.1023  | 2930.06226 | 3438.25342 |
| gene-MA16_Dca025483                | 73.535255  | 66.344177  | 79.720253  | 12.9214    | 13.136728  | 14.699594  | 4.816596   | 6.010002   | 4.56216    |
| gene-MA16_Dca015589                | 451.317108 | 489.8927   | 462.069946 | 37.667061  | 34.940376  | 35.549641  | 30.952978  | 26.071495  | 20.861385  |
| Dendrobium_catenatum_newGene_14206 | 25.186317  | 23.443796  | 26.547611  | 11.903019  | 12.094784  | 10.639973  | 9.837658   | 7.985337   | 9.044916   |
| gene-MA16_Dca014182                | 43.664673  | 44.252266  | 46.14069   | 23.258684  | 17.818731  | 19.109859  | 11.769007  | 13.517145  | 13.707285  |
| gene-MA16_Dca014184                | 8.55871    | 7.701402   | 7.56281    | 0.853406   | 1.536582   | 0.835754   | 0.577494   | 0.921891   | 0.435868   |

|                     |            |            |            |            |            |            |            |           |            |
|---------------------|------------|------------|------------|------------|------------|------------|------------|-----------|------------|
| gene-MA16_Dca014186 | 7.834657   | 9.11785    | 7.133779   | 1.117534   | 1.170153   | 1.452688   | 1.610107   | 0.675717  | 0.518578   |
| gene-MA16_Dca022103 | 24.556976  | 20.679708  | 23.463903  | 9.015975   | 8.573655   | 8.768081   | 5.933249   | 8.009872  | 4.637593   |
| gene-MA16_Dca007806 | 1.104995   | 1.10648    | 1.0415     | 2.029782   | 1.776453   | 1.880507   | 2.54454    | 3.462713  | 3.487123   |
| gene-MA16_Dca007807 | 10.788198  | 10.080695  | 11.510191  | 17.852556  | 17.338545  | 13.153975  | 32.067402  | 29.232555 | 28.111055  |
| gene-MA16_Dca007800 | 4.57376    | 4.209191   | 5.11888    | 0.856496   | 0.688375   | 0.872006   | 0.154608   | 0         | 0          |
| gene-MA16_Dca022916 | 9.267338   | 8.674274   | 9.789879   | 20.69698   | 21.38542   | 21.136765  | 22.958546  | 21.134066 | 19.803528  |
| gene-MA16_Dca011834 | 0.500178   | 0.940244   | 1.091668   | 2.007613   | 1.414824   | 2.243538   | 3.5398     | 1.984808  | 2.235332   |
| gene-MA16_Dca025680 | 1.147933   | 2.468044   | 1.376994   | 2.374453   | 2.978878   | 2.600798   | 4.170176   | 4.340706  | 4.148519   |
| gene-MA16_Dca004053 | 8.85815    | 10.061852  | 9.702868   | 28.645481  | 25.97122   | 29.160641  | 17.220007  | 16.626308 | 18.676367  |
| gene-MA16_Dca018472 | 19.092642  | 21.551229  | 17.369215  | 25.447943  | 23.138161  | 24.467237  | 74.870506  | 64.904312 | 62.575901  |
| gene-MA16_Dca005983 | 1.89984    | 1.235529   | 2.983083   | 1.609878   | 2.772394   | 6.037223   | 5.701461   | 3.73846   | 5.618696   |
| gene-MA16_Dca018477 | 70.345909  | 71.054527  | 73.54657   | 9.48586    | 19.430206  | 15.826563  | 14.50528   | 17.157707 | 11.423857  |
| gene-MA16_Dca018478 | 13.457854  | 8.831146   | 10.869708  | 4.128812   | 4.721045   | 5.028824   | 4.930035   | 5.983177  | 5.000965   |
| gene-MA16_Dca002065 | 14.040874  | 15.047563  | 13.098495  | 9.206168   | 7.843569   | 9.107588   | 6.576995   | 5.642195  | 4.790393   |
| gene-MA16_Dca002067 | 112.149933 | 105.240753 | 112.85276  | 80.696877  | 78.737022  | 80.284744  | 36.881882  | 35.003937 | 34.420109  |
| gene-MA16_Dca009320 | 79.390335  | 73.407364  | 68.62957   | 23.706491  | 25.552465  | 23.788296  | 31.470707  | 29.756176 | 30.999954  |
| gene-MA16_Dca009329 | 54.816696  | 63.630859  | 57.125156  | 19.857821  | 22.294912  | 20.37883   | 27.606115  | 31.887699 | 30.868778  |
| gene-MA16_Dca009328 | 42.886284  | 45.237339  | 46.474567  | 21.083437  | 18.715607  | 18.585445  | 21.042509  | 25.507608 | 21.174664  |
| gene-MA16_Dca006362 | 17.081631  | 14.944501  | 15.875202  | 9.09953    | 9.592451   | 12.499988  | 6.872751   | 6.112794  | 6.434781   |
| gene-MA16_Dca012915 | 0.807427   | 1.158795   | 0.707096   | 1.666545   | 2.143285   | 2.017512   | 2.448946   | 3.172591  | 3.191988   |
| gene-MA16_Dca009816 | 65.560402  | 64.726555  | 62.752815  | 23.235392  | 25.51963   | 25.728416  | 35.173775  | 30.767292 | 36.711681  |
| gene-MA16_Dca009813 | 45.22987   | 48.312363  | 45.061508  | 24.532017  | 28.302467  | 27.464979  | 18.921036  | 19.010277 | 17.077852  |
| gene-MA16_Dca019820 | 15.059927  | 17.88842   | 15.721343  | 8.295299   | 9.628039   | 9.319668   | 6.277696   | 6.182237  | 5.951985   |
| gene-MA16_Dca012288 | 51.777817  | 49.724777  | 55.539581  | 44.331409  | 48.973824  | 43.957996  | 17.737972  | 12.530951 | 11.507022  |
| gene-MA16_Dca012286 | 17.309765  | 15.667164  | 16.215185  | 9.03927    | 9.47067    | 10.170035  | 7.174795   | 7.814229  | 8.203097   |
| gene-MA16_Dca020989 | 811.311768 | 1073.2666  | 959.977478 | 310.387543 | 497.075439 | 429.769592 | 333.072784 | 305.90686 | 402.122162 |
| gene-MA16_Dca011534 | 1.66798    | 2.098815   | 1.637753   | 0.711223   | 0.719138   | 0.344402   | 0.102021   | 0.425959  | 0.512234   |
| gene-MA16_Dca003072 | 75.487312  | 77.254723  | 76.480339  | 26.52437   | 35.484451  | 31.293344  | 23.248024  | 19.274986 | 25.464165  |

|                                   |            |            |            |           |            |            |            |            |            |
|-----------------------------------|------------|------------|------------|-----------|------------|------------|------------|------------|------------|
| gene-MA16_Dca003076               | 14.532847  | 13.555596  | 13.952194  | 4.781579  | 3.17023    | 4.381829   | 2.113497   | 1.374121   | 2.112756   |
| gene-MA16_Dca003078               | 2.662411   | 3.761913   | 3.713526   | 1.482413  | 1.52949    | 1.787536   | 1.320105   | 1.813989   | 1.23642    |
| gene-MA16_Dca013669               | 14.794641  | 16.370977  | 17.675789  | 7.724499  | 6.019035   | 5.76356    | 7.043334   | 5.567472   | 7.365857   |
| gene-MA16_Dca023511               | 2.599902   | 2.239224   | 2.682353   | 0.672818  | 0.497299   | 1.716315   | 0.857516   | 0.328872   | 0.885309   |
| gene-MA16_Dca014577               | 17.860374  | 16.314306  | 16.607809  | 10.72386  | 12.124752  | 10.834726  | 6.524855   | 6.664744   | 7.128919   |
| Dendrobium_catenatum_newGene_2357 | 7.777104   | 6.224229   | 6.360125   | 5.815519  | 3.470321   | 3.617471   | 3.561424   | 3.254655   | 3.902152   |
| gene-MA16_Dca015626               | 40.73502   | 40.661102  | 39.510796  | 98.009789 | 89.126328  | 89.499916  | 114.182823 | 109.007317 | 108.516968 |
| gene-MA16_Dca021119               | 482.275879 | 484.021729 | 464.794861 | 199.41687 | 193.022903 | 198.522675 | 179.7668   | 163.75621  | 154.768982 |
| gene-MA16_Dca013963               | 13.552556  | 17.877882  | 18.86413   | 19.775856 | 21.16301   | 18.481998  | 5.666336   | 4.937591   | 6.450172   |
| gene-MA16_Dca007215               | 7.093102   | 9.055578   | 9.057634   | 4.893085  | 4.973987   | 4.90058    | 12.645067  | 9.198024   | 12.204338  |
| gene-MA16_Dca008551               | 2.779206   | 2.137416   | 1.597487   | 4.775159  | 4.838077   | 5.895794   | 8.452604   | 9.07868    | 9.578593   |
| gene-MA16_Dca028973               | 10.133825  | 8.389377   | 8.758559   | 0.968719  | 2.47665    | 1.553453   | 1.008705   | 1.607214   | 2.678314   |
| gene-MA16_Dca020798               | 67.649315  | 63.303528  | 62.905769  | 11.55336  | 17.719574  | 14.351281  | 11.328117  | 11.660143  | 9.889068   |
| gene-MA16_Dca020792               | 8.011602   | 5.389423   | 11.421147  | 3.390807  | 5.945082   | 4.586838   | 1.464324   | 1.212288   | 3.292348   |
| gene-MA16_Dca006163               | 19.716095  | 20.101803  | 20.092791  | 19.710838 | 16.766426  | 19.352135  | 148.328339 | 143.033417 | 140.974274 |
| gene-MA16_Dca006166               | 18.350872  | 19.490206  | 21.282589  | 9.52582   | 8.962419   | 5.932352   | 66.382355  | 64.673653  | 58.174183  |
| gene-MA16_Dca008305               | 17.69281   | 19.290335  | 15.560475  | 16.435291 | 14.980002  | 14.006392  | 31.557055  | 33.030769  | 33.79216   |
| gene-MA16_Dca026433               | 21.229853  | 24.368912  | 21.313053  | 0.345687  | 0.240142   | 0.345883   | 0.414432   | 0.628763   | 0.338862   |
| gene-MA16_Dca005538               | 1.183661   | 2.622382   | 1.680104   | 2.396956  | 3.2967     | 3.241475   | 4.192588   | 3.835451   | 6.295942   |
| gene-MA16_Dca006943               | 19.229345  | 19.340231  | 17.509745  | 44.382553 | 44.320606  | 41.980556  | 51.218513  | 54.117332  | 45.349579  |
| gene-MA16_Dca006946               | 192.052063 | 195.179199 | 196.091614 | 95.668602 | 90.646713  | 93.23745   | 89.176559  | 89.026215  | 88.370605  |
| gene-MA16_Dca003277               | 27.409414  | 25.253349  | 24.401588  | 12.735875 | 9.786225   | 10.872261  | 10.01022   | 8.655623   | 9.946672   |
| gene-MA16_Dca003279               | 12.915225  | 11.960179  | 12.246538  | 1.68463   | 1.62358    | 0.985188   | 1.592876   | 1.676215   | 0.962199   |
| gene-MA16_Dca028747               | 11.146855  | 8.665486   | 9.142238   | 2.170438  | 4.902144   | 2.697008   | 0.500076   | 0.607015   | 0.757766   |
| Dendrobium_catenatum_newGene_2590 | 0.402324   | 0.408651   | 0.32187    | 0.691554  | 0.290167   | 0.664325   | 2.490745   | 1.3684     | 2.598766   |
| gene-MA16_Dca025072               | 115.547546 | 115.642532 | 119.713806 | 12.452743 | 9.30337    | 11.099873  | 11.473103  | 9.915936   | 8.74637    |
| gene-MA16_Dca012890               | 2.981935   | 3.314546   | 2.197355   | 3.623153  | 3.117412   | 2.751219   | 6.919835   | 5.652306   | 7.583831   |
| gene-MA16_Dca012896               | 2.278239   | 1.791149   | 2.066976   | 1.035395  | 0.658529   | 0.709583   | 0.669835   | 0.685112   | 0.60308    |

|                                    |            |            |            |            |            |            |            |            |            |
|------------------------------------|------------|------------|------------|------------|------------|------------|------------|------------|------------|
| gene-MA16_Dca023701                | 1.992692   | 2.410145   | 2.31296    | 3.095685   | 4.856178   | 5.953937   | 10.485729  | 8.535483   | 8.926805   |
| gene-MA16_Dca024302                | 6.794992   | 6.460185   | 3.530718   | 15.108825  | 15.988596  | 17.446787  | 17.508183  | 17.063162  | 19.35672   |
| gene-MA16_Dca000203                | 444.605377 | 450.116882 | 429.604431 | 88.739456  | 83.238335  | 127.988197 | 87.527916  | 83.182182  | 82.73777   |
| gene-MA16_Dca012070                | 11.466642  | 10.08892   | 12.006008  | 27.109543  | 26.033318  | 26.401907  | 54.198288  | 54.344784  | 56.428223  |
| gene-MA16_Dca017295                | 86.863213  | 89.221245  | 87.225418  | 123.746056 | 123.479492 | 124.357346 | 224.944931 | 213.192825 | 207.449554 |
| gene-MA16_Dca017290                | 18.551203  | 18.791504  | 18.831844  | 0          | 0          | 0          | 0.204277   | 0.16032    | 0.035772   |
| gene-MA16_Dca018112                | 12.47988   | 9.964536   | 11.750431  | 17.835537  | 26.061115  | 23.938564  | 49.355301  | 54.145618  | 59.921505  |
| gene-MA16_Dca018113                | 1.217368   | 3.621074   | 2.019601   | 4.661559   | 4.551566   | 3.396158   | 10.782245  | 8.04344    | 7.745898   |
| gene-MA16_Dca018110                | 24.187977  | 23.220682  | 23.286909  | 9.041375   | 11.659226  | 11.24631   | 8.308781   | 8.749546   | 10.687012  |
| gene-MA16_Dca025536                | 10.676235  | 8.65563    | 7.863172   | 0.917931   | 1.667671   | 0.581559   | 0.93359    | 0.488798   | 0.777152   |
| gene-MA16_Dca017831                | 476.904907 | 476.345093 | 482.712646 | 43.045792  | 40.553329  | 45.101124  | 71.36409   | 65.943199  | 67.634178  |
| gene-MA16_Dca014506                | 5.74625    | 5.69402    | 5.817021   | 3.433157   | 4.705203   | 5.022882   | 2.581152   | 2.849979   | 3.036649   |
| gene-MA16_Dca014503                | 0.525679   | 0.689897   | 0.889201   | 7.733397   | 5.135077   | 6.279701   | 6.795111   | 7.366501   | 5.937346   |
| gene-MA16_Dca019799                | 91.985832  | 93.380493  | 89.264732  | 360.530701 | 340.35141  | 354.138    | 590.960938 | 598.178223 | 566.927063 |
| gene-MA16_Dca015473                | 3.756147   | 3.962394   | 3.950009   | 0.664526   | 0.634151   | 0.360804   | 1.207709   | 1.479329   | 1.507523   |
| gene-MA16_Dca004971                | 3.549254   | 2.796369   | 4.44641    | 0.189858   | 0.082071   | 0.256349   | 0.201372   | 0.246867   | 0.375026   |
| gene-MA16_Dca004973                | 325.516724 | 326.212708 | 317.24234  | 19.876497  | 17.812922  | 20.015177  | 54.903366  | 48.448635  | 52.167141  |
| gene-MA16_Dca004975                | 61.257103  | 62.45536   | 58.906628  | 20.517982  | 17.75985   | 22.048454  | 12.033641  | 10.36933   | 12.434482  |
| gene-MA16_Dca004974                | 50.381699  | 49.274239  | 49.838245  | 75.752029  | 67.199913  | 69.686623  | 174.666    | 159.491058 | 168.43718  |
| gene-MA16_Dca004977                | 59.270859  | 63.231834  | 59.806274  | 30.948132  | 25.323521  | 26.019258  | 29.780972  | 30.858484  | 34.405647  |
| gene-MA16_Dca020051                | 47.481678  | 48.252827  | 45.531033  | 30.395004  | 30.33563   | 30.695009  | 22.707743  | 24.435875  | 24.597862  |
| gene-MA16_Dca007407                | 3.458117   | 2.98144    | 3.108327   | 0.269717   | 0.706016   | 0.354552   | 1.203052   | 0.747111   | 0.531628   |
| gene-MA16_Dca001802                | 4.198064   | 3.684927   | 4.835572   | 3.357087   | 1.761109   | 2.683151   | 9.712961   | 7.636604   | 8.424259   |
| gene-MA16_Dca001807                | 102.607498 | 102.608818 | 106.293877 | 58.465549  | 65.570877  | 63.509636  | 25.48423   | 22.256514  | 22.188124  |
| gene-MA16_Dca005312                | 37.28714   | 40.465294  | 38.182648  | 58.255623  | 55.354008  | 58.606972  | 25.774593  | 27.811722  | 23.063894  |
| gene-MA16_Dca005313                | 7.883953   | 7.802429   | 8.25691    | 19.978582  | 20.002728  | 20.500074  | 15.337366  | 14.125203  | 12.774811  |
| Dendrobium_catenatum_newGene_15051 | 2.549862   | 1.924777   | 3.52145    | 6.713077   | 5.850617   | 5.929298   | 4.354836   | 5.007151   | 4.381299   |
| gene-MA16_Dca008536                | 38.80389   | 41.928028  | 36.38039   | 14.756033  | 16.233595  | 15.442675  | 7.013827   | 6.514999   | 7.795242   |

|                                    |            |            |            |            |            |            |            |            |            |
|------------------------------------|------------|------------|------------|------------|------------|------------|------------|------------|------------|
| Dendrobium_catenatum_newGene_3954  | 57.184174  | 54.571629  | 56.699619  | 26.597635  | 31.24416   | 28.370783  | 26.58674   | 27.701801  | 27.063673  |
| gene-MA16_Dca004193                | 35.145142  | 38.162445  | 37.230556  | 28.874159  | 29.576956  | 30.678881  | 15.849954  | 17.204823  | 18.827951  |
| gene-MA16_Dca001117                | 3.48669    | 4.132044   | 3.550123   | 1.656687   | 1.163121   | 2.220675   | 1.517471   | 1.728876   | 1.767978   |
| gene-MA16_Dca011749                | 5.584105   | 4.002286   | 5.641086   | 2.362138   | 2.300739   | 2.587996   | 4.477915   | 7.845669   | 5.207508   |
| gene-MA16_Dca010429                | 7.537359   | 7.47102    | 5.923825   | 11.726832  | 10.299871  | 8.522991   | 4.027126   | 3.487902   | 3.290784   |
| gene-MA16_Dca000994                | 20.180767  | 23.641478  | 19.796175  | 0.935789   | 0.722967   | 1.621625   | 2.272556   | 3.47267    | 2.898054   |
| gene-MA16_Dca000992                | 332.379364 | 317.795319 | 344.264099 | 168.536179 | 174.422729 | 170.735153 | 178.026581 | 171.365875 | 166.649658 |
| gene-MA16_Dca000999                | 2.752895   | 2.590455   | 2.611918   | 0.226981   | 0.398777   | 0.314272   | 0.499343   | 0.660584   | 0.215502   |
| gene-MA16_Dca002593                | 0.638659   | 0.740624   | 0.775878   | 0          | 0          | 0.046316   | 0.071243   | 0          | 0          |
| gene-MA16_Dca010901                | 35.539627  | 43.160843  | 43.169529  | 69.217064  | 71.54657   | 81.769676  | 91.574486  | 83.609535  | 84.861267  |
| gene-MA16_Dca009615                | 56.543873  | 60.72224   | 64.197975  | 16.200089  | 19.888395  | 22.286715  | 17.384338  | 19.685122  | 18.684355  |
| gene-MA16_Dca012465                | 0.20441    | 0.217014   | 0.43493    | 1.033381   | 0.953555   | 1.280627   | 1.105028   | 0.860281   | 0.942994   |
| gene-MA16_Dca026204                | 73.153557  | 75.533646  | 78.060349  | 40.019009  | 41.80809   | 43.530396  | 28.735676  | 31.261438  | 33.360645  |
| gene-MA16_Dca026209                | 16.205555  | 17.488482  | 17.311651  | 13.946087  | 12.48582   | 14.003164  | 9.707875   | 8.706699   | 7.819087   |
| gene-MA16_Dca023783                | 44.081791  | 40.760368  | 42.371662  | 46.99622   | 45.255127  | 46.972042  | 113.269897 | 107.13826  | 107.829819 |
| gene-MA16_Dca015278                | 41.416637  | 43.06163   | 40.459789  | 0.223222   | 0.113707   | 0.282443   | 0.119795   | 0.063325   | 0.206323   |
| gene-MA16_Dca015270                | 1.987147   | 0.879451   | 1.179998   | 1.117242   | 2.896012   | 1.933855   | 2.376648   | 4.131537   | 3.607376   |
| Dendrobium_catenatum_newGene_4276  | 1.204601   | 1.606537   | 1.569526   | 1.441025   | 0.774024   | 1.433116   | 0.437994   | 0.555221   | 0.485381   |
| gene-MA16_Dca021520                | 4.842404   | 4.425845   | 4.836159   | 7.531145   | 8.007809   | 7.522459   | 3.416222   | 2.291809   | 3.02843    |
| gene-MA16_Dca020695                | 37.198059  | 38.085224  | 38.5214    | 17.238766  | 16.26527   | 15.955667  | 19.225948  | 21.839405  | 23.082596  |
| gene-MA16_Dca020834                | 0.364183   | 0.230467   | 0.369366   | 1.81162    | 1.827917   | 1.555724   | 1.87982    | 1.288668   | 1.58927    |
| gene-MA16_Dca020831                | 5.240064   | 5.224924   | 4.673187   | 1.733908   | 1.785116   | 2.245873   | 1.537987   | 2.036489   | 1.581677   |
| Dendrobium_catenatum_newGene_11809 | 0.796561   | 0.567203   | 0.712687   | 6.302279   | 4.715934   | 7.447585   | 5.257902   | 6.216623   | 5.331385   |
| Dendrobium_catenatum_newGene_11806 | 1.699351   | 0.644394   | 1.124803   | 0.889028   | 1.460562   | 2.069565   | 2.580076   | 3.150478   | 4.318963   |
| gene-MA16_Dca011220                | 2.791552   | 1.990701   | 2.830328   | 6.795196   | 6.2581     | 6.549649   | 4.898063   | 6.4556     | 6.089274   |
| gene-MA16_Dca011228                | 1.728768   | 1.134887   | 1.812167   | 0.44411    | 0.733812   | 0.382313   | 1.66946    | 1.652066   | 2.232901   |
| gene-MA16_Dca022999                | 6.439763   | 4.483977   | 7.15122    | 12.75229   | 12.774145  | 11.810342  | 16.749416  | 16.176403  | 15.510654  |
| gene-MA16_Dca018094                | 51.44294   | 49.903111  | 52.376949  | 25.873791  | 26.063662  | 24.29184   | 29.179945  | 28.323048  | 25.03105   |

|                                   |            |            |            |            |            |            |            |            |            |
|-----------------------------------|------------|------------|------------|------------|------------|------------|------------|------------|------------|
| Dendrobium_catenatum_newGene_873  | 0.120907   | 0.256058   | 0.303719   | 0.752592   | 0.412573   | 0.736205   | 0.254362   | 1.116527   | 0.735591   |
| gene-MA16_Dca019059               | 0.33972    | 0.472046   | 0.176416   | 0.489494   | 0.147808   | 0.157232   | 1.086995   | 0.837624   | 0.873952   |
| gene-MA16_Dca005907               | 3.434034   | 5.495463   | 5.63221    | 0.784299   | 0.320185   | 1.008863   | 1.390726   | 2.93758    | 2.809344   |
| gene-MA16_Dca005905               | 3.557344   | 3.874128   | 4.318974   | 0.333499   | 0.197087   | 0.305277   | 0.450772   | 0.493802   | 0.373937   |
| gene-MA16_Dca005908               | 244.37999  | 234.781891 | 246.751709 | 82.466049  | 80.493881  | 82.405594  | 106.757957 | 94.774559  | 94.630554  |
| Dendrobium_catenatum_newGene_1762 | 228.693832 | 226.892548 | 233.846741 | 1384.44812 | 1545.94458 | 1358.89893 | 1420.026   | 1509.39941 | 1431.25061 |
| gene-MA16_Dca003993               | 18.962807  | 22.245325  | 30.157618  | 10.948866  | 13.125091  | 13.881139  | 8.194033   | 7.34089    | 12.670508  |
| gene-MA16_Dca007679               | 23.054317  | 22.54018   | 23.798141  | 11.922916  | 9.842171   | 10.027537  | 17.431154  | 13.591793  | 16.382137  |
| gene-MA16_Dca009687               | 9.229332   | 9.652055   | 9.063328   | 3.81276    | 3.32192    | 4.00406    | 8.801391   | 8.908047   | 8.722298   |
| gene-MA16_Dca005298               | 6.851707   | 5.727576   | 5.187646   | 6.089162   | 5.88588    | 6.245512   | 16.961683  | 13.373943  | 13.768187  |
| gene-MA16_Dca005291               | 12.82273   | 8.947485   | 9.245209   | 5.439885   | 7.348076   | 5.654669   | 5.107436   | 3.855772   | 2.533235   |
| gene-MA16_Dca009897               | 96.388603  | 98.412109  | 95.1828    | 36.716743  | 34.743557  | 36.411495  | 60.722286  | 60.980492  | 60.641354  |
| Dendrobium_catenatum_newGene_4077 | 1.407274   | 1.266683   | 1.484838   | 0.424727   | 0.595307   | 0.395855   | 1.082979   | 1.41652    | 0.981317   |
| Dendrobium_catenatum_newGene_4076 | 2.52558    | 1.834653   | 1.690306   | 0.690013   | 1.054575   | 0.780152   | 1.123238   | 1.014328   | 1.296649   |
| gene-MA16_Dca012203               | 7.83289    | 5.621172   | 6.334604   | 3.323291   | 3.400608   | 3.610308   | 1.80921    | 2.629399   | 2.897621   |
| gene-MA16_Dca020905               | 199.135559 | 205.448669 | 198.339478 | 13.106388  | 13.058828  | 13.172132  | 7.164276   | 6.37285    | 7.501322   |
| gene-MA16_Dca020902               | 82.171379  | 87.154732  | 83.139267  | 5.961537   | 4.520115   | 5.984194   | 3.06732    | 4.133513   | 3.579168   |
| gene-MA16_Dca002389               | 1.396358   | 1.776722   | 1.250121   | 3.045506   | 2.789037   | 1.577205   | 5.46868    | 5.669382   | 4.834486   |
| gene-MA16_Dca023597               | 1.182392   | 1.356164   | 1.414962   | 1.924214   | 2.115997   | 1.676787   | 3.47021    | 2.65638    | 2.532968   |
| gene-MA16_Dca009408               | 0.26369    | 0.409888   | 0.699939   | 1.571324   | 1.28518    | 1.534457   | 0.808751   | 0.459768   | 1.241445   |
| gene-MA16_Dca012789               | 3.278651   | 3.86694    | 3.366059   | 0.335079   | 0.060246   | 0.38695    | 0.03624    | 0.026855   | 0          |
| gene-MA16_Dca011847               | 1.534897   | 1.479386   | 1.008276   | 1.329348   | 1.075076   | 1.396247   | 0.805904   | 0.763139   | 0.383796   |
| gene-MA16_Dca009534               | 0.24472    | 0.415281   | 0.184672   | 0.926288   | 0.423606   | 0.617004   | 1.317714   | 1.06233    | 1.175863   |
| gene-MA16_Dca014317               | 0.523419   | 0.693148   | 0.529518   | 1.282497   | 1.153512   | 0.867319   | 3.346563   | 2.251692   | 3.793056   |
| gene-MA16_Dca025141               | 38.91769   | 38.337616  | 36.286591  | 10.288246  | 11.2674    | 12.319702  | 10.31268   | 7.848943   | 9.646969   |
| gene-MA16_Dca026746               | 162.341873 | 160.30899  | 148.294052 | 57.253319  | 54.384872  | 59.055779  | 25.182978  | 26.676315  | 25.262657  |
| gene-MA16_Dca008486               | 0.637977   | 0.924721   | 0.865527   | 0.963735   | 1.215771   | 1.107247   | 2.733716   | 2.022106   | 2.408416   |
| gene-MA16_Dca010150               | 123.492783 | 133.203812 | 129.416229 | 63.369682  | 66.314888  | 64.070663  | 72.65609   | 71.805046  | 73.641212  |



|                                    |            |            |            |           |           |           |            |            |            |
|------------------------------------|------------|------------|------------|-----------|-----------|-----------|------------|------------|------------|
| gene-MA16_Dca018132                | 34.541122  | 37.576065  | 38.516861  | 4.484228  | 4.573651  | 5.080448  | 8.732142   | 9.580895   | 9.078178   |
| gene-MA16_Dca007528                | 0.566788   | 0.189183   | 0.314647   | 0.071471  | 0.63078   | 0.389849  | 1.083795   | 1.060003   | 1.192327   |
| gene-MA16_Dca001380                | 19.848017  | 16.8736    | 14.091794  | 11.193582 | 10.913857 | 8.355014  | 8.300249   | 8.31846    | 7.424682   |
| gene-MA16_Dca025805                | 1.636409   | 0.647546   | 1.26114    | 1.635985  | 2.786279  | 1.390817  | 3.83532    | 3.775218   | 4.541493   |
| gene-MA16_Dca017500                | 3.54331    | 3.161712   | 3.204585   | 0.07389   | 1.202651  | 1.142507  | 0.846053   | 0          | 1.08332    |
| gene-MA16_Dca017505                | 121.210762 | 133.104675 | 131.572693 | 39.943104 | 33.296017 | 38.513363 | 138.901596 | 137.127563 | 129.904648 |
| gene-MA16_Dca004262                | 5.109204   | 4.502205   | 4.064923   | 12.376715 | 11.019709 | 10.11609  | 17.703568  | 18.402079  | 22.140223  |
| gene-MA16_Dca001588                | 38.782745  | 38.240196  | 37.673534  | 70.360214 | 65.918678 | 64.105713 | 85.859421  | 87.372047  | 87.139748  |
| gene-MA16_Dca004841                | 50.521896  | 55.568027  | 55.986378  | 58.963589 | 63.238522 | 59.471035 | 119.340691 | 123.785469 | 122.597923 |
| gene-MA16_Dca003810                | 7.663182   | 4.208913   | 5.054131   | 6.962824  | 7.371436  | 5.356355  | 0.156584   | 0.204015   | 0.201132   |
| gene-MA16_Dca003817                | 3.03793    | 3.737605   | 2.926913   | 0.806625  | 1.746229  | 1.518278  | 1.539822   | 1.490661   | 0.996745   |
| gene-MA16_Dca003816                | 4.116508   | 3.804105   | 3.730619   | 2.576648  | 1.871329  | 2.129962  | 1.835001   | 1.0571     | 1.486474   |
| gene-MA16_Dca002144                | 23.350712  | 24.034286  | 22.405605  | 9.073048  | 7.300001  | 7.042656  | 9.76932    | 9.60772    | 9.806161   |
| Dendrobium_catenatum_newGene_1268  | 0.287835   | 0.494742   | 0.476594   | 0.618385  | 0.71864   | 1.319727  | 1.137637   | 1.194109   | 0.72511    |
| gene-MA16_Dca009178                | 26.384914  | 30.425726  | 31.215256  | 2.76619   | 2.443655  | 1.97187   | 1.107003   | 0.887042   | 1.443215   |
| gene-MA16_Dca012812                | 1.35876    | 1.337845   | 1.204553   | 3.20894   | 2.411659  | 3.476696  | 3.299906   | 3.083445   | 2.165865   |
| gene-MA16_Dca002858                | 13.405492  | 12.962984  | 12.470222  | 7.241603  | 4.970938  | 5.465943  | 5.779647   | 8.132357   | 5.259822   |
| gene-MA16_Dca002857                | 13.57014   | 13.949471  | 14.108797  | 8.430677  | 10.646891 | 10.161764 | 28.654934  | 27.382122  | 27.52438   |
| gene-MA16_Dca002851                | 0.937093   | 1.123724   | 1.628317   | 1.655267  | 2.599268  | 2.296502  | 4.76574    | 3.044409   | 2.065477   |
| gene-MA16_Dca019903                | 34.472099  | 34.841156  | 34.931934  | 16.718998 | 15.674596 | 15.241644 | 19.693367  | 20.540672  | 22.468346  |
| gene-MA16_Dca008723                | 3.156013   | 3.083183   | 2.970277   | 4.767877  | 3.364523  | 3.313674  | 11.275837  | 14.778221  | 16.327461  |
| gene-MA16_Dca000178                | 2.114613   | 1.388392   | 1.868131   | 1.029356  | 0.455274  | 0.884802  | 0.307335   | 0.313133   | 0.257169   |
| gene-MA16_Dca000176                | 1.904459   | 1.543078   | 2.547403   | 0.616511  | 0.912194  | 0.98565   | 3.351887   | 3.561854   | 3.861608   |
| gene-MA16_Dca011671                | 3.528754   | 4.069086   | 3.748929   | 13.869226 | 12.295403 | 13.065602 | 19.532658  | 21.539778  | 21.690187  |
| gene-MA16_Dca011673                | 5.418987   | 2.938429   | 5.451494   | 4.822255  | 5.127634  | 4.07618   | 10.567763  | 8.810976   | 12.557177  |
| gene-MA16_Dca011675                | 29.580921  | 26.402945  | 32.11692   | 45.867203 | 38.802128 | 41.44762  | 64.20929   | 67.122086  | 70.750732  |
| Dendrobium_catenatum_newGene_10529 | 0.405034   | 0.321486   | 0.527756   | 1.10416   | 1.803993  | 1.202915  | 0.631235   | 1.273652   | 0.433846   |
| gene-MA16_Dca000827                | 0          | 0.648461   | 0          | 1.688363  | 1.548445  | 1.242383  | 6.153022   | 4.620965   | 4.123254   |

|                                    |            |            |            |            |            |            |            |            |            |
|------------------------------------|------------|------------|------------|------------|------------|------------|------------|------------|------------|
| gene-MA16_Dca003736                | 45.493847  | 40.649944  | 39.737705  | 128.886444 | 122.929955 | 127.692039 | 224.416626 | 220.664276 | 219.083145 |
| gene-MA16_Dca003730                | 1.199536   | 1.429245   | 1.525748   | 1.636635   | 0.627694   | 1.025425   | 1.003875   | 0.436676   | 0.410535   |
| gene-MA16_Dca018021                | 4.725331   | 4.640188   | 5.303474   | 9.649351   | 10.612437  | 11.560427  | 20.5804    | 20.261568  | 21.054501  |
| gene-MA16_Dca003739                | 11.089277  | 9.602671   | 10.150946  | 5.404155   | 4.788277   | 4.595919   | 5.348481   | 4.497483   | 4.322711   |
| gene-MA16_Dca013740                | 6.170246   | 4.791653   | 4.824624   | 2.610865   | 4.222684   | 2.849857   | 2.692451   | 1.876261   | 1.832306   |
| gene-MA16_Dca013741                | 322.60849  | 305.866211 | 317.062103 | 71.409859  | 72.324272  | 70.89698   | 89.229149  | 80.418114  | 81.500656  |
| gene-MA16_Dca013744                | 3.207603   | 3.418629   | 3.28349    | 4.693892   | 5.353205   | 5.438876   | 9.964341   | 7.778481   | 9.985165   |
| gene-MA16_Dca027970                | 3.265272   | 2.419808   | 4.097239   | 2.161175   | 1.21698    | 1.152081   | 0.134406   | 0.707181   | 2.006699   |
| gene-MA16_Dca014430                | 9.480502   | 8.216251   | 9.677935   | 17.57501   | 14.36216   | 15.695577  | 22.802275  | 22.306494  | 23.145819  |
| gene-MA16_Dca014433                | 0.482979   | 1.409915   | 0.778214   | 2.595537   | 2.205524   | 1.953261   | 5.187667   | 4.897182   | 4.805883   |
| gene-MA16_Dca009234                | 87.986153  | 94.628738  | 88.213516  | 43.861687  | 40.023613  | 45.141457  | 58.553257  | 52.459473  | 59.501293  |
| Dendrobium_catenatum_newGene_10898 | 0.833391   | 0.579359   | 0.193669   | 1.213819   | 1.410519   | 1.05468    | 2.013533   | 1.417548   | 1.97282    |
| gene-MA16_Dca026597                | 5.151175   | 5.51489    | 4.306942   | 9.091811   | 7.858396   | 6.564418   | 13.457534  | 11.306449  | 9.995874   |
| gene-MA16_Dca014290                | 2.257493   | 2.823519   | 2.858272   | 1.569824   | 1.473908   | 1.648827   | 3.862411   | 3.865314   | 3.566104   |
| gene-MA16_Dca010243                | 0.832135   | 0.393519   | 0.427799   | 0          | 0.40765    | 0          | 1.582744   | 1.669779   | 1.636229   |
| gene-MA16_Dca010245                | 1.124467   | 0.502666   | 0.720562   | 2.168022   | 2.914983   | 1.802439   | 3.603544   | 2.084584   | 2.75819    |
| gene-MA16_Dca001198                | 5.387535   | 5.233377   | 6.031175   | 7.195702   | 7.482189   | 6.416814   | 12.630483  | 12.870937  | 12.119968  |
| gene-MA16_Dca001191                | 11.001691  | 11.504174  | 11.878421  | 7.119141   | 7.257308   | 7.249707   | 4.996766   | 5.033666   | 4.4895     |
| gene-MA16_Dca001195                | 3.228915   | 3.221457   | 3.116762   | 1.490223   | 1.019366   | 1.282725   | 2.450125   | 2.292809   | 3.074592   |
| Dendrobium_catenatum_newGene_7160  | 0.208833   | 0.419389   | 0.168724   | 0.529642   | 0.868944   | 0.576087   | 0.630174   | 0.845633   | 1.169028   |
| Dendrobium_catenatum_newGene_8396  | 3.205481   | 1.414587   | 1.210746   | 0.501804   | 0.347903   | 0.795481   | 0.096029   | 0.26498    | 0.067868   |
| Dendrobium_catenatum_newGene_8644  | 148.384827 | 150.246857 | 117.817871 | 48.952148  | 80.186378  | 49.643356  | 59.43573   | 60.702629  | 62.139484  |
| gene-MA16_Dca003139                | 35.624451  | 35.05241   | 40.956833  | 7.141714   | 7.064649   | 8.955979   | 9.76836    | 8.997451   | 9.031629   |
| gene-MA16_Dca016970                | 2.04388    | 2.607274   | 2.218185   | 4.938039   | 5.285257   | 5.641886   | 21.365049  | 19.108671  | 20.912987  |
| gene-MA16_Dca008928                | 20.385996  | 20.328688  | 18.753777  | 4.756475   | 4.097207   | 3.548667   | 3.900979   | 4.645612   | 4.036423   |
| gene-MA16_Dca008929                | 0.863914   | 0.916307   | 0.918366   | 4.690495   | 2.951328   | 3.456928   | 4.974807   | 6.689516   | 5.341111   |
| Dendrobium_catenatum_newGene_4764  | 0.32668    | 0.205102   | 0.334933   | 0.611136   | 1.185673   | 0.684276   | 0.937753   | 0.918747   | 0.836486   |
| gene-MA16_Dca015945                | 131.023056 | 117.99427  | 120.07972  | 3.525844   | 3.082151   | 3.054512   | 2.48299    | 1.757909   | 2.343966   |

|                                    |            |            |            |            |            |            |            |            |            |
|------------------------------------|------------|------------|------------|------------|------------|------------|------------|------------|------------|
| gene-MA16_Dca010718                | 6.32859    | 7.469532   | 5.361936   | 3.630928   | 2.519975   | 2.518369   | 8.798264   | 6.500103   | 7.703601   |
| gene-MA16_Dca020619                | 17.012651  | 18.344355  | 19.584196  | 10.747845  | 10.612284  | 12.883975  | 7.779944   | 6.970304   | 8.89502    |
| gene-MA16_Dca000325                | 64.660538  | 69.523766  | 67.433975  | 30.433451  | 24.90423   | 25.228313  | 45.910812  | 42.740723  | 44.948895  |
| gene-MA16_Dca000322                | 3.099281   | 1.892821   | 3.77385    | 0.6179     | 0.676649   | 1.120789   | 0.076696   | 0.174817   | 0.386831   |
| gene-MA16_Dca027345                | 5.810571   | 4.933459   | 4.616296   | 2.626244   | 3.228888   | 1.219149   | 4.543997   | 3.597007   | 3.899681   |
| gene-MA16_Dca027346                | 8.216586   | 8.809663   | 7.367089   | 6.245079   | 5.266497   | 7.707051   | 15.823993  | 13.466115  | 14.393227  |
| gene-MA16_Dca029030                | 6.846624   | 6.539556   | 6.943529   | 0.748481   | 1.686962   | 2.348029   | 11.005729  | 11.852374  | 9.618883   |
| gene-MA16_Dca003676                | 31.214853  | 29.072315  | 31.249245  | 54.167934  | 49.322662  | 50.148674  | 91.829712  | 93.392525  | 95.356232  |
| gene-MA16_Dca016712                | 104.404175 | 99.26268   | 101.766701 | 83.650406  | 84.334557  | 78.323212  | 49.410538  | 41.411484  | 40.647377  |
| gene-MA16_Dca012624                | 7.045412   | 5.383218   | 6.9211     | 0.418133   | 1.192178   | 2.051327   | 1.797055   | 1.456763   | 2.24617    |
| gene-MA16_Dca028348                | 12.135682  | 13.535398  | 10.51167   | 1.018391   | 1.922259   | 3.250235   | 1.661101   | 1.986698   | 1.328854   |
| gene-MA16_Dca017390                | 25.447138  | 24.451721  | 22.485434  | 9.05353    | 8.407656   | 7.586411   | 7.717033   | 7.37801    | 7.970676   |
| gene-MA16_Dca017395                | 3.997941   | 3.408921   | 3.570825   | 8.599263   | 6.668052   | 7.429328   | 7.599591   | 10.068824  | 7.992733   |
| gene-MA16_Dca017394                | 8.32888    | 6.462105   | 7.359288   | 20.920099  | 19.460951  | 22.959747  | 21.341787  | 22.162495  | 21.3999    |
| gene-MA16_Dca026123                | 18.846422  | 20.307732  | 21.344898  | 2.408726   | 0.720073   | 0.849229   | 0.171132   | 1.162621   | 0.401813   |
| gene-MA16_Dca018019                | 4.738999   | 7.008348   | 8.031089   | 10.876     | 11.177646  | 11.676904  | 19.575844  | 19.422701  | 13.631617  |
| gene-MA16_Dca017971                | 0.305982   | 0.276541   | 0.363594   | 0.227216   | 0.569462   | 0.147953   | 1.144185   | 0.744499   | 0.595944   |
| gene-MA16_Dca018905                | 30.513685  | 34.577019  | 33.676605  | 18.964041  | 17.081062  | 20.247566  | 14.484152  | 15.75386   | 15.863931  |
| gene-MA16_Dca015535                | 352.533264 | 341.185303 | 356.121674 | 122.533447 | 115.873512 | 113.223953 | 139.391388 | 143.854172 | 124.260109 |
| gene-MA16_Dca015534                | 2.096042   | 2.203696   | 2.082294   | 0.03789    | 0          | 0          | 0          | 0          | 0          |
| gene-MA16_Dca015533                | 5.394315   | 4.927505   | 6.049578   | 0          | 0          | 0          | 0          | 0.114075   | 0          |
| gene-MA16_Dca021201                | 3.076962   | 2.945445   | 3.084616   | 1.666197   | 1.309953   | 1.314323   | 0.644379   | 0.941493   | 0.688603   |
| gene-MA16_Dca021208                | 80.431305  | 82.35585   | 88.322495  | 31.967335  | 31.350578  | 32.424347  | 22.221861  | 22.812832  | 24.245142  |
| Dendrobium_catenatum_newGene_11261 | 4.564106   | 2.357893   | 3.704491   | 0.229294   | 0.27325    | 0.300228   | 0.54013    | 0.374959   | 0.12256    |
| gene-MA16_Dca007369                | 14.458781  | 14.414382  | 14.436618  | 2.574628   | 1.889281   | 2.183461   | 2.895221   | 3.450098   | 3.879698   |
| gene-MA16_Dca007368                | 13.344762  | 13.877922  | 13.841506  | 2.539534   | 2.393403   | 2.413836   | 3.481222   | 4.5954     | 2.789878   |
| gene-MA16_Dca007367                | 9.258919   | 9.890854   | 9.627669   | 32.705482  | 34.485615  | 33.708828  | 34.096359  | 32.466125  | 31.166882  |
| gene-MA16_Dca008271                | 4.793588   | 5.050633   | 5.327013   | 1.577529   | 2.025351   | 1.990406   | 2.409101   | 2.935285   | 2.121573   |

|                                   |            |            |            |            |            |            |            |            |            |
|-----------------------------------|------------|------------|------------|------------|------------|------------|------------|------------|------------|
| gene-MA16_Dca006547               | 10.360149  | 11.85709   | 7.5361     | 0.403307   | 0.341499   | 0.292113   | 0.587809   | 0.773218   | 0.76284    |
| gene-MA16_Dca001015               | 5.657787   | 4.399716   | 5.577767   | 12.832031  | 11.089488  | 10.452188  | 21.330822  | 18.538038  | 18.389868  |
| gene-MA16_Dca001019               | 9.757985   | 11.303382  | 9.856298   | 6.026973   | 5.715687   | 6.209541   | 4.941745   | 4.819282   | 4.721509   |
| gene-MA16_Dca011026               | 3.685815   | 2.998878   | 3.054455   | 5.544541   | 3.481312   | 3.822616   | 9.38907    | 7.687137   | 7.664931   |
| gene-MA16_Dca000653               | 33.989563  | 28.900131  | 27.458866  | 15.065741  | 15.661525  | 13.61639   | 13.933642  | 13.768558  | 10.236189  |
| gene-MA16_Dca000659               | 615.271484 | 621.144958 | 580.334595 | 124.893013 | 123.945488 | 118.289589 | 221.734421 | 200.645065 | 212.976196 |
| gene-MA16_Dca002650               | 169.237549 | 155.863937 | 165.64769  | 307.151031 | 301.415619 | 301.793762 | 495.610352 | 453.213409 | 442.775635 |
| gene-MA16_Dca012014               | 0.045621   | 0.343997   | 0.077941   | 0.582207   | 0.128146   | 0.13579    | 2.327135   | 3.876864   | 2.128038   |
| gene-MA16_Dca003303               | 1.367651   | 1.407707   | 1.388437   | 2.586479   | 2.989363   | 3.878683   | 2.297046   | 2.671506   | 2.508888   |
| gene-MA16_Dca012703               | 23.063492  | 24.176373  | 24.425625  | 8.145986   | 8.695085   | 7.701168   | 6.653418   | 6.034676   | 6.996432   |
| gene-MA16_Dca026327               | 16.118011  | 14.744812  | 15.057422  | 6.65134    | 5.838909   | 8.50299    | 14.22698   | 12.266062  | 17.350945  |
| Dendrobium_catenatum_newGene_2029 | 12.15344   | 11.554288  | 10.374499  | 39.342151  | 38.299461  | 40.819811  | 42.570798  | 42.34799   | 42.592954  |
| gene-MA16_Dca009489               | 0.585673   | 1.348468   | 0.669795   | 4.528153   | 5.268094   | 5.661025   | 6.816243   | 6.638508   | 7.1879     |
| gene-MA16_Dca009484               | 0.695132   | 0.44949    | 0.564757   | 1.012607   | 0.776266   | 1.188281   | 1.637016   | 0.825696   | 1.667292   |
| gene-MA16_Dca009482               | 67.684219  | 63.842049  | 65.829865  | 62.133083  | 63.330738  | 65.852425  | 184.263062 | 172.639359 | 168.840469 |
| gene-MA16_Dca026497               | 1071.50806 | 1081.40454 | 1080.63586 | 303.338104 | 268.67865  | 279.487793 | 365.737335 | 334.089844 | 349.331818 |
| gene-MA16_Dca026491               | 2.569377   | 3.059363   | 3.559672   | 0.702226   | 0.825702   | 0.551134   | 0.648125   | 1.066268   | 0.53922    |
| gene-MA16_Dca025678               | 1.825051   | 3.343763   | 2.529636   | 0          | 0.090414   | 0          | 0.375494   | 0          | 0.134305   |
| Dendrobium_catenatum_newGene_327  | 5.059599   | 4.227137   | 5.405555   | 7.088746   | 6.508692   | 6.589643   | 13.408623  | 11.014321  | 9.271508   |
| Dendrobium_catenatum_newGene_4151 | 12.929427  | 12.158155  | 10.896251  | 16.082104  | 16.841047  | 17.315908  | 31.113565  | 22.343849  | 28.910482  |
| gene-MA16_Dca019618               | 29.919146  | 31.391403  | 29.434147  | 64.306557  | 56.58313   | 61.545052  | 157.473312 | 138.646088 | 145.440887 |
| gene-MA16_Dca019614               | 259.353668 | 266.690247 | 250.226364 | 113.784538 | 105.753426 | 114.508759 | 151.061035 | 151.363724 | 161.631836 |
| gene-MA16_Dca010035               | 0.623709   | 0.101811   | 0.753298   | 3.222747   | 1.038657   | 3.560439   | 7.767034   | 4.458792   | 3.915362   |
| gene-MA16_Dca024235               | 9.916025   | 10.410247  | 8.864775   | 3.185339   | 3.075744   | 4.764778   | 1.972291   | 2.851273   | 4.187437   |
| gene-MA16_Dca024236               | 22.346994  | 23.968002  | 25.026506  | 10.025735  | 10.149684  | 9.10586    | 9.634825   | 9.411285   | 10.311101  |
| gene-MA16_Dca020425               | 32.313541  | 34.386417  | 30.941959  | 18.090982  | 19.808878  | 16.592432  | 10.591442  | 12.513752  | 10.020147  |
| gene-MA16_Dca020426               | 687.380554 | 689.088562 | 674.485413 | 778.037048 | 719.960205 | 775.846619 | 238.851639 | 243.048508 | 236.671082 |
| gene-MA16_Dca011342               | 21.018745  | 17.592369  | 23.04895   | 11.36067   | 7.596232   | 11.263497  | 10.295748  | 11.458825  | 10.965545  |

|                                    |           |           |           |           |           |           |           |           |           |
|------------------------------------|-----------|-----------|-----------|-----------|-----------|-----------|-----------|-----------|-----------|
| gene-MA16_Dca027046                | 48.51786  | 50.314022 | 46.735485 | 9.915061  | 9.586271  | 8.304991  | 11.489336 | 10.505591 | 10.248653 |
| gene-MA16_Dca027044                | 1.125665  | 1.672947  | 1.563057  | 1.629271  | 1.230736  | 1.713923  | 0.69246   | 0.519625  | 0.491304  |
| gene-MA16_Dca027043                | 16.552317 | 17.69219  | 20.93152  | 17.722132 | 23.271816 | 22.076836 | 7.442264  | 8.493609  | 6.969457  |
| gene-MA16_Dca026694                | 21.832481 | 23.19396  | 21.310783 | 0.722423  | 0.667619  | 0.591542  | 0.943553  | 1.218885  | 0.626248  |
| gene-MA16_Dca023309                | 0.219013  | 0.495726  | 0.989912  | 1.700662  | 0.516564  | 0.766269  | 4.602773  | 2.741257  | 2.695706  |
| gene-MA16_Dca025889                | 25.437778 | 22.348444 | 25.523306 | 5.581201  | 5.031095  | 4.871472  | 8.909997  | 4.62996   | 7.946947  |
| gene-MA16_Dca019152                | 41.402676 | 36.199516 | 37.863823 | 16.730164 | 13.270836 | 14.448936 | 11.955547 | 13.685743 | 13.017419 |
| Dendrobium_catenatum_newGene_1150  | 1.603569  | 1.554582  | 0.924479  | 1.271491  | 2.403043  | 2.056978  | 4.767098  | 4.420094  | 2.321902  |
| gene-MA16_Dca014228                | 0.549614  | 0.551576  | 0.2044    | 1.192281  | 0.746748  | 1.288692  | 3.095668  | 2.151507  | 1.945286  |
| gene-MA16_Dca014229                | 1.63091   | 1.779229  | 0.917167  | 0.229348  | 0.224231  | 0.383163  | 1.380388  | 1.340627  | 1.69564   |
| gene-MA16_Dca018761                | 6.080248  | 7.82231   | 4.731136  | 0.663415  | 0.285872  | 0.185543  | 0.754816  | 0         | 0.870951  |
| gene-MA16_Dca007539                | 2.446423  | 2.489681  | 1.565281  | 0.526841  | 0.965211  | 1.206515  | 1.022271  | 1.221859  | 1.174962  |
| gene-MA16_Dca007531                | 89.025398 | 88.880699 | 81.955788 | 30.913618 | 29.901392 | 28.535946 | 9.551126  | 10.176535 | 8.730275  |
| gene-MA16_Dca007533                | 62.224392 | 69.10302  | 62.714222 | 16.968468 | 14.80374  | 16.247623 | 12.102451 | 12.782186 | 11.677429 |
| gene-MA16_Dca000256                | 0.748324  | 0.728802  | 1.111777  | 1.62405   | 1.258338  | 1.563964  | 2.263253  | 2.384798  | 2.009393  |
| gene-MA16_Dca010235                | 4.800573  | 5.090696  | 3.864703  | 1.651219  | 3.75376   | 2.821055  | 1.61616   | 2.129554  | 1.171413  |
| gene-MA16_Dca010234                | 3.526282  | 2.859388  | 3.297202  | 2.09894   | 1.574776  | 2.265321  | 1.311226  | 0.86708   | 1.424524  |
| gene-MA16_Dca010580                | 0.210762  | 0.192497  | 0.286337  | 0.431617  | 0.372712  | 0.565825  | 0.574091  | 0.553124  | 0.453     |
| gene-MA16_Dca003406                | 7.807133  | 8.177645  | 7.928373  | 29.624901 | 34.336651 | 31.851175 | 51.716846 | 54.143936 | 50.064617 |
| gene-MA16_Dca014342                | 7.880379  | 8.292576  | 7.997176  | 3.148702  | 2.912121  | 4.047244  | 3.911541  | 4.313766  | 4.230934  |
| gene-MA16_Dca016322                | 1.133765  | 0.482808  | 1.190957  | 0.54877   | 0.621125  | 0.63945   | 1.855649  | 1.539052  | 1.71119   |
| Dendrobium_catenatum_newGene_6403  | 1.501068  | 1.582771  | 1.659026  | 2.010617  | 3.226685  | 2.334083  | 3.81591   | 3.690814  | 3.789291  |
| Dendrobium_catenatum_newGene_6400  | 0.657878  | 0.778482  | 0.611124  | 0.699233  | 0.507558  | 1.047948  | 1.468219  | 1.21291   | 2.749024  |
| gene-MA16_Dca022813                | 14.533894 | 15.485093 | 14.753707 | 8.172957  | 7.636961  | 8.113008  | 5.405594  | 5.469626  | 5.948597  |
| gene-MA16_Dca022811                | 12.936227 | 10.713061 | 11.559518 | 25.049089 | 29.960205 | 24.957544 | 39.453022 | 39.763142 | 42.161961 |
| gene-MA16_Dca009728                | 12.728527 | 15.011605 | 15.5116   | 13.292643 | 11.38676  | 14.114109 | 6.157997  | 6.609932  | 9.197234  |
| Dendrobium_catenatum_newGene_16416 | 2.936407  | 3.846785  | 4.114913  | 2.77885   | 1.751691  | 1.805928  | 1.312644  | 1.84754   | 1.336892  |
| gene-MA16_Dca026517                | 3.177794  | 3.362977  | 3.537237  | 5.603275  | 3.504178  | 4.149095  | 0.830972  | 0.473268  | 0.706986  |

|                                   |            |            |            |            |            |            |            |           |            |
|-----------------------------------|------------|------------|------------|------------|------------|------------|------------|-----------|------------|
| gene-MA16_Dca025555               | 5.998327   | 6.401714   | 7.403864   | 15.825158  | 19.74292   | 16.955519  | 35.419159  | 32.609486 | 38.277412  |
| gene-MA16_Dca017749               | 145.03334  | 143.441223 | 150.979019 | 61.392319  | 61.887897  | 65.841721  | 46.021317  | 44.376152 | 47.217968  |
| gene-MA16_Dca012513               | 100.532608 | 96.457306  | 109.692818 | 18.4849    | 18.847626  | 14.859425  | 28.882839  | 24.696045 | 25.613153  |
| gene-MA16_Dca024918               | 59.061195  | 55.973305  | 53.508541  | 25.682608  | 23.753809  | 25.537098  | 21.988094  | 22.099501 | 24.384449  |
| gene-MA16_Dca011961               | 0.476927   | 0.31593    | 0.242169   | 1.499498   | 1.337231   | 0.934237   | 2.340942   | 2.003734  | 4.075485   |
| gene-MA16_Dca014219               | 617.685486 | 573.772034 | 584.662659 | 115.551414 | 117.532661 | 123.200272 | 106.495407 | 92.167854 | 99.036896  |
| gene-MA16_Dca018775               | 1.383036   | 1.310953   | 1.234711   | 0          | 0.066959   | 0.061768   | 0          | 0         | 0          |
| gene-MA16_Dca018770               | 49.572388  | 47.947403  | 45.737621  | 82.691391  | 76.646713  | 64.200478  | 104.469505 | 95.550568 | 106.352753 |
| Dendrobium_catenatum_newGene_288  | 20.568174  | 20.383963  | 22.42078   | 56.287327  | 63.550842  | 62.55439   | 89.843491  | 88.97789  | 85.147934  |
| gene-MA16_Dca019421               | 16.853594  | 17.474575  | 15.791872  | 11.479984  | 13.271791  | 10.785874  | 4.749173   | 6.649001  | 7.737991   |
| gene-MA16_Dca021631               | 25.145731  | 26.688196  | 24.97011   | 46.996086  | 42.735256  | 47.34676   | 64.963371  | 68.500427 | 66.275146  |
| gene-MA16_Dca021635               | 0.458697   | 0.633608   | 0.23742    | 0.37518    | 0.312165   | 0.393458   | 1.299391   | 1.637459  | 1.023723   |
| gene-MA16_Dca021634               | 0          | 0          | 0.070982   | 0.252701   | 0          | 0.07083    | 0.943747   | 0.616995  | 1.337623   |
| gene-MA16_Dca021981               | 35.609192  | 31.511456  | 33.920906  | 19.888412  | 16.633177  | 16.945755  | 20.138231  | 17.258902 | 18.202276  |
| gene-MA16_Dca024008               | 61.561413  | 55.791035  | 60.436012  | 34.895065  | 26.322842  | 26.229719  | 33.402672  | 31.55554  | 27.001101  |
| gene-MA16_Dca020584               | 2.680422   | 3.801054   | 3.137996   | 1.683019   | 1.431239   | 1.363099   | 2.340496   | 2.535538  | 2.866333   |
| gene-MA16_Dca027673               | 1.902289   | 1.982035   | 2.338453   | 1.884117   | 3.158669   | 2.082276   | 8.257369   | 6.10145   | 7.789627   |
| gene-MA16_Dca026982               | 47.542595  | 51.186062  | 45.632328  | 33.044556  | 32.44611   | 32.017712  | 23.434057  | 21.893309 | 24.411716  |
| gene-MA16_Dca023806               | 11.997796  | 11.304694  | 10.441588  | 5.033288   | 5.736609   | 4.057892   | 5.09068    | 5.687547  | 4.142628   |
| gene-MA16_Dca027583               | 2.425499   | 1.945606   | 1.514992   | 1.020949   | 1.059624   | 1.678416   | 0.57379    | 0.520629  | 0.726168   |
| gene-MA16_Dca017260               | 4.043802   | 3.691475   | 2.845272   | 4.036154   | 4.460591   | 5.55387    | 7.220388   | 8.570336  | 7.476413   |
| Dendrobium_catenatum_newGene_5680 | 0.954948   | 0.456329   | 0.547449   | 0.711507   | 0.785682   | 0.733385   | 1.838073   | 2.032389  | 1.888987   |
| Dendrobium_catenatum_newGene_6640 | 14.841399  | 15.423709  | 12.233612  | 8.591578   | 8.675344   | 9.674936   | 3.772865   | 2.74064   | 3.930181   |
| Dendrobium_catenatum_newGene_9191 | 1.131674   | 0.616178   | 0.515145   | 1.971767   | 0.7735     | 1.485881   | 2.876604   | 1.92956   | 1.275355   |
| Dendrobium_catenatum_newGene_9190 | 2.596544   | 2.573515   | 2.805754   | 3.570017   | 3.56096    | 3.033901   | 7.486042   | 6.347242  | 8.279375   |
| Dendrobium_catenatum_newGene_7599 | 0          | 0.067301   | 0          | 0.215936   | 0.077849   | 1.094241   | 2.234983   | 2.207882  | 1.493235   |
| gene-MA16_Dca007703               | 1.990916   | 1.684994   | 1.551409   | 2.633379   | 2.414905   | 2.606436   | 4.670424   | 3.663646  | 5.277182   |
| gene-MA16_Dca002950               | 2.218186   | 1.562099   | 1.017038   | 0.377668   | 0.317574   | 0.403207   | 0.172653   | 0.172973  | 0.258775   |

|                                    |            |            |            |            |            |            |            |            |            |
|------------------------------------|------------|------------|------------|------------|------------|------------|------------|------------|------------|
| gene-MA16_Dca006258                | 63.832844  | 58.514366  | 60.883816  | 31.330976  | 31.008156  | 30.55036   | 34.04483   | 35.299217  | 34.530224  |
| gene-MA16_Dca001704                | 136.806885 | 126.757477 | 130.14798  | 67.764084  | 70.741829  | 70.169762  | 46.348988  | 45.036964  | 43.208748  |
| gene-MA16_Dca001703                | 78.54348   | 65.550438  | 64.948486  | 59.025837  | 56.22031   | 58.430386  | 32.131035  | 27.390402  | 32.817139  |
| gene-MA16_Dca010796                | 77.848076  | 79.030647  | 78.971802  | 97.274094  | 93.594177  | 97.826309  | 164.040726 | 172.822922 | 171.662872 |
| Dendrobium_catenatum_newGene_10201 | 1.316913   | 1.349838   | 1.482817   | 1.562442   | 1.537242   | 1.518998   | 0.384266   | 0.44641    | 0.411288   |
| gene-MA16_Dca016797                | 40.876263  | 39.646027  | 40.017479  | 51.933857  | 50.63409   | 53.488369  | 89.289978  | 87.241821  | 81.263771  |
| gene-MA16_Dca011447                | 4.618937   | 4.275408   | 4.256487   | 1.503243   | 1.320599   | 0.823001   | 1.030021   | 0.661169   | 0.485074   |
| Dendrobium_catenatum_newGene_16332 | 39.314128  | 37.824468  | 35.019255  | 14.75267   | 9.770065   | 13.686039  | 9.647912   | 12.713332  | 14.533962  |
| Dendrobium_catenatum_newGene_11642 | 159.679474 | 146.742661 | 174.181763 | 148.282928 | 143.713013 | 151.101028 | 53.789043  | 54.992592  | 45.711159  |
| gene-MA16_Dca019835                | 12.738192  | 14.128524  | 15.421272  | 6.195265   | 7.655777   | 5.664757   | 10.983979  | 8.841543   | 10.482273  |
| gene-MA16_Dca012492                | 22.040251  | 23.772968  | 19.80447   | 10.01572   | 9.428421   | 8.464051   | 9.301547   | 8.616078   | 8.711066   |
| Dendrobium_catenatum_newGene_10996 | 14.423358  | 15.828261  | 13.356158  | 6.096716   | 5.886208   | 5.803416   | 6.616868   | 5.425972   | 4.264213   |
| gene-MA16_Dca019323                | 1.814385   | 1.166944   | 1.525067   | 8.002134   | 7.993552   | 8.816258   | 7.837389   | 7.195901   | 6.485986   |
| gene-MA16_Dca018982                | 2.825526   | 2.72144    | 2.162763   | 0.315801   | 0.685915   | 0.676341   | 0.576411   | 0.125588   | 0.328836   |
| gene-MA16_Dca021289                | 2.136397   | 1.329105   | 1.419599   | 2.623295   | 2.292178   | 2.770552   | 5.437661   | 4.978685   | 4.712112   |
| Dendrobium_catenatum_newGene_9355  | 3.298626   | 4.37094    | 4.848503   | 6.381134   | 4.908823   | 6.119658   | 11.457222  | 8.800247   | 11.88536   |
| gene-MA16_Dca021863                | 41.144531  | 41.386597  | 42.323898  | 22.855732  | 18.278749  | 20.599449  | 26.185867  | 23.927057  | 27.488016  |
| gene-MA16_Dca021861                | 4.786395   | 4.832012   | 4.421511   | 1.248078   | 1.10585    | 1.47984    | 3.935427   | 3.48546    | 2.848635   |
| gene-MA16_Dca027425                | 6.85       | 6.007495   | 6.626916   | 2.275964   | 1.661886   | 1.551952   | 1.663486   | 1.865734   | 0.930831   |
| Dendrobium_catenatum_newGene_8901  | 11.082898  | 8.850189   | 9.76712    | 16.985468  | 17.175428  | 18.058914  | 28.794436  | 30.399612  | 26.269772  |
| gene-MA16_Dca006019                | 0.984354   | 1.22613    | 1.431368   | 0.471596   | 1.014637   | 0.539265   | 0.364892   | 0.231487   | 0.277469   |
| gene-MA16_Dca004528                | 12.466298  | 9.334455   | 7.631545   | 1.561852   | 0.831047   | 2.022262   | 3.728755   | 3.200122   | 2.715747   |
| gene-MA16_Dca004529                | 47.657703  | 45.311646  | 41.264519  | 26.350504  | 28.384901  | 22.364914  | 20.64319   | 20.748623  | 20.905678  |
| gene-MA16_Dca028652                | 1.38286    | 1.457767   | 1.163011   | 0.821075   | 0.729872   | 0.957473   | 0.561195   | 0.544588   | 0.26597    |
| gene-MA16_Dca001540                | 0.758678   | 0.744604   | 0.995473   | 1.832865   | 2.512123   | 1.554993   | 6.120012   | 6.34907    | 4.102226   |
| gene-MA16_Dca007878                | 38.737701  | 42.377121  | 42.872433  | 17.49383   | 15.98334   | 16.533752  | 15.228431  | 14.828918  | 11.230588  |
| gene-MA16_Dca007873                | 36.886806  | 38.330719  | 32.58569   | 13.411875  | 12.128808  | 11.329366  | 9.220632   | 9.249921   | 9.120099   |
| gene-MA16_Dca001095                | 4.327103   | 2.336971   | 2.248345   | 1.003565   | 0.416593   | 0.494481   | 3.094133   | 2.931809   | 3.765301   |

|                                   |            |            |            |            |            |            |            |            |            |
|-----------------------------------|------------|------------|------------|------------|------------|------------|------------|------------|------------|
| gene-MA16_Dca010882               | 1.458495   | 1.681645   | 1.611043   | 0.252666   | 0.528711   | 0.619744   | 1.163122   | 0.554717   | 0.970154   |
| Dendrobium_catenatum_newGene_8120 | 47.631001  | 42.253422  | 44.2673    | 18.164284  | 18.736546  | 15.089849  | 17.711025  | 15.011872  | 14.639354  |
| gene-MA16_Dca004062               | 168.174469 | 161.970306 | 170.393707 | 218.10791  | 203.95488  | 213.071976 | 444.547974 | 438.583282 | 436.932159 |
| gene-MA16_Dca026389               | 5.556557   | 5.236608   | 6.173546   | 1.322229   | 0.824686   | 1.190502   | 0.403249   | 0.388675   | 0.307062   |
| gene-MA16_Dca028103               | 2.278022   | 1.69093    | 1.295082   | 0.257469   | 0.043661   | 0.468717   | 0          | 0.253327   | 0.302238   |
| Dendrobium_catenatum_newGene_1061 | 0.18885    | 0.132799   | 0.422085   | 0.397664   | 0.467139   | 0.533821   | 0.897468   | 0.751709   | 1.17966    |
| gene-MA16_Dca009375               | 29.747988  | 32.872887  | 31.13855   | 82.422096  | 76.13237   | 78.925034  | 123.750603 | 110.97805  | 116.779053 |
| gene-MA16_Dca002031               | 7.797134   | 8.454844   | 7.494905   | 12.635729  | 11.479417  | 11.735575  | 5.639454   | 5.843348   | 4.80276    |
| gene-MA16_Dca012960               | 37.972466  | 40.491203  | 34.790058  | 15.595457  | 13.885912  | 13.17466   | 13.588387  | 11.947075  | 10.910263  |
| gene-MA16_Dca008135               | 8.822217   | 8.847919   | 8.121862   | 19.939125  | 21.587734  | 24.645657  | 27.805735  | 28.094103  | 30.745779  |
| gene-MA16_Dca008136               | 48.075981  | 52.100746  | 48.854992  | 81.681038  | 72.302757  | 77.735474  | 135.843674 | 133.067474 | 128.349503 |
| gene-MA16_Dca008139               | 44.511147  | 45.36092   | 44.94939   | 12.628196  | 10.843189  | 12.865411  | 49.037273  | 45.984295  | 45.090679  |
| gene-MA16_Dca019872               | 1.250061   | 2.346655   | 1.402464   | 1.002382   | 1.030962   | 0.989915   | 3.97681    | 3.087004   | 2.651042   |
| gene-MA16_Dca010616               | 1.769886   | 1.149206   | 2.142555   | 0.883664   | 0.695308   | 0.822077   | 2.162751   | 1.304625   | 0.819287   |
| gene-MA16_Dca026612               | 6.341189   | 5.177507   | 6.283495   | 3.444296   | 3.681751   | 2.626465   | 2.192101   | 1.237568   | 1.275904   |
| gene-MA16_Dca016618               | 46.618538  | 48.890499  | 47.394062  | 20.289936  | 21.899923  | 20.782524  | 26.318565  | 28.494911  | 30.144533  |
| gene-MA16_Dca017058               | 54.887459  | 49.526218  | 55.028427  | 53.404442  | 49.940472  | 49.930878  | 22.275492  | 23.475805  | 20.071037  |
| gene-MA16_Dca017057               | 22.435143  | 21.211733  | 20.027506  | 0.083224   | 0.155204   | 0.141384   | 0.091768   | 0.180326   | 0          |
| gene-MA16_Dca018861               | 133.491272 | 131.248611 | 129.549667 | 108.503098 | 109.896545 | 100.050095 | 53.240276  | 56.345024  | 53.516647  |
| gene-MA16_Dca021128               | 0.832795   | 1.084708   | 1.399096   | 3.261037   | 3.577452   | 3.822313   | 5.429175   | 4.490921   | 4.455304   |
| gene-MA16_Dca021120               | 12.516397  | 12.346364  | 11.879917  | 8.82105    | 9.31316    | 8.553665   | 4.972001   | 4.948672   | 4.031755   |
| gene-MA16_Dca021124               | 65.699265  | 63.063854  | 74.72065   | 103.710663 | 114.967697 | 105.838394 | 156.045532 | 166.568314 | 141.82901  |
| gene-MA16_Dca015367               | 91.84935   | 94.865372  | 94.349388  | 15.04239   | 15.485087  | 15.281951  | 13.816611  | 16.541025  | 16.205124  |
| gene-MA16_Dca020299               | 13.241625  | 13.288033  | 12.742691  | 3.621861   | 3.939563   | 3.596467   | 4.064775   | 3.139681   | 5.131758   |
| gene-MA16_Dca020745               | 42.488857  | 42.883617  | 45.2934    | 24.767923  | 26.212475  | 25.572481  | 23.387627  | 22.519722  | 20.151438  |
| gene-MA16_Dca007244               | 42.087963  | 45.961132  | 40.41082   | 80.293137  | 80.372017  | 84.939323  | 123.355125 | 121.26136  | 142.361465 |
| gene-MA16_Dca007245               | 0          | 0.058527   | 0          | 2.356874   | 1.14687    | 2.221394   | 8.710509   | 5.925941   | 4.683914   |
| gene-MA16_Dca024196               | 3.491404   | 3.784758   | 2.793438   | 2.331094   | 1.777671   | 1.374129   | 1.822584   | 1.662493   | 1.437945   |



|                                   |            |            |            |            |            |            |            |            |            |
|-----------------------------------|------------|------------|------------|------------|------------|------------|------------|------------|------------|
| gene-MA16_Dca006198               | 4.474293   | 2.534245   | 2.27357    | 0.199636   | 0.227869   | 0.751792   | 0.614182   | 0.078026   | 0.848487   |
| Dendrobium_catenatum_newGene_9841 | 42.549271  | 40.724774  | 44.034467  | 21.117131  | 21.18446   | 19.80078   | 14.444167  | 17.388707  | 17.766447  |
| gene-MA16_Dca011103               | 3.458203   | 2.814642   | 3.304214   | 7.445465   | 6.497674   | 8.053863   | 5.208909   | 4.359904   | 3.996245   |
| Dendrobium_catenatum_newGene_1456 | 3.071448   | 1.837946   | 3.778024   | 7.423698   | 6.772999   | 7.272867   | 9.197959   | 10.011584  | 11.831047  |
| gene-MA16_Dca020991               | 534.261475 | 436.088257 | 610.883789 | 212.659714 | 373.184174 | 208.540024 | 244.56601  | 252.122955 | 305.565308 |
| gene-MA16_Dca028731               | 12.745929  | 10.05758   | 10.797389  | 0.903363   | 0.639823   | 0.404735   | 0.727016   | 0.846801   | 1.574729   |
| gene-MA16_Dca022678               | 5.303127   | 4.353638   | 3.287874   | 0.714285   | 0.587105   | 1.106873   | 0.716274   | 0.245082   | 0.604889   |
| gene-MA16_Dca008812               | 5.130173   | 3.825477   | 4.152697   | 5.915961   | 4.879885   | 6.474218   | 2.59783    | 2.207451   | 2.260233   |
| gene-MA16_Dca008814               | 6.428249   | 5.910119   | 5.9345     | 0.602727   | 0.64816    | 0.786135   | 0.905356   | 0.690194   | 0.782846   |
| gene-MA16_Dca013240               | 0.463341   | 0.154267   | 0.533445   | 0.458451   | 0.487391   | 0.891153   | 1.18038    | 1.525138   | 1.580348   |
| gene-MA16_Dca024080               | 5.759667   | 4.613564   | 4.78068    | 0.418796   | 0.169544   | 0.131902   | 0.551251   | 0.396235   | 0.446497   |
| gene-MA16_Dca024084               | 180.168594 | 183.322128 | 181.41333  | 68.965767  | 62.797665  | 65.849976  | 46.790745  | 42.840359  | 42.690331  |
| gene-MA16_Dca026759               | 159.417572 | 135.445206 | 159.59407  | 41.613369  | 103.778313 | 42.125439  | 41.090229  | 53.017422  | 61.269127  |
| gene-MA16_Dca015834               | 13.280752  | 14.557715  | 12.93444   | 11.684381  | 10.834099  | 10.479733  | 6.269823   | 7.221236   | 7.525002   |
| gene-MA16_Dca029102               | 2.318522   | 3.413311   | 4.474202   | 2.233521   | 4.15548    | 0.643659   | 8.650068   | 9.413727   | 6.918003   |
| gene-MA16_Dca026906               | 1.40461    | 1.086387   | 1.51613    | 2.466015   | 2.893827   | 2.06421    | 3.700421   | 3.60121    | 3.413575   |
| gene-MA16_Dca026901               | 1.850855   | 2.870933   | 1.688186   | 5.881034   | 6.856713   | 4.945889   | 2.519198   | 2.066945   | 2.955343   |
| gene-MA16_Dca023268               | 894.542603 | 922.385925 | 877.468994 | 132.524414 | 111.457947 | 116.959076 | 148.680038 | 134.511322 | 132.297226 |
| gene-MA16_Dca003158               | 8.110241   | 6.34755    | 7.625815   | 16.052546  | 12.532814  | 13.653567  | 18.432537  | 16.739698  | 15.409343  |
| gene-MA16_Dca026019               | 8.876454   | 7.769536   | 7.246148   | 0.835556   | 1.198623   | 0.941503   | 1.792642   | 1.607613   | 1.557613   |
| gene-MA16_Dca010466               | 34.15176   | 35.299244  | 29.979994  | 7.22471    | 6.858959   | 8.09346    | 4.566831   | 3.107783   | 2.168162   |
| gene-MA16_Dca010463               | 26.211037  | 27.391211  | 29.104109  | 9.252142   | 8.207567   | 9.348589   | 8.35975    | 8.656161   | 5.987973   |
| gene-MA16_Dca019297               | 32.979893  | 31.367168  | 32.027061  | 13.648491  | 12.11938   | 14.91708   | 20.926702  | 18.712681  | 20.440716  |
| gene-MA16_Dca014713               | 127.340317 | 125.621307 | 118.935959 | 80.390259  | 85.606125  | 85.186424  | 54.077442  | 47.553387  | 50.984489  |
| gene-MA16_Dca019741               | 4.392276   | 3.522442   | 4.230282   | 0.128834   | 0          | 0          | 0          | 0          | 0.102235   |
| gene-MA16_Dca021379               | 19.650858  | 21.923246  | 24.144514  | 6.964804   | 5.639874   | 6.323209   | 9.065772   | 9.177787   | 8.083861   |
| gene-MA16_Dca021373               | 14.882792  | 14.224918  | 13.46568   | 12.464123  | 14.457286  | 14.149132  | 6.779222   | 6.036939   | 6.678681   |
| gene-MA16_Dca021371               | 4.52016    | 4.445192   | 4.595359   | 10.299759  | 8.560363   | 6.938067   | 11.898362  | 10.372509  | 11.443406  |

|                     |            |            |            |            |            |            |           |            |            |
|---------------------|------------|------------|------------|------------|------------|------------|-----------|------------|------------|
| gene-MA16_Dca021377 | 24.368107  | 24.187744  | 20.420156  | 60.775593  | 58.745625  | 64.519646  | 119.77285 | 111.287834 | 111.825409 |
| gene-MA16_Dca015443 | 27.933605  | 25.694994  | 27.794638  | 8.204865   | 8.184688   | 8.550358   | 8.864871  | 8.344699   | 8.653909   |
| gene-MA16_Dca004924 | 2.887436   | 3.11894    | 4.134167   | 0.322462   | 0.910006   | 0.50546    | 0.43432   | 0.538843   | 0.116328   |
| gene-MA16_Dca005329 | 4.192509   | 5.550784   | 3.780799   | 1.403463   | 1.558871   | 1.508293   | 1.273448  | 0.723246   | 0.788463   |
| gene-MA16_Dca007781 | 1.66924    | 0.992003   | 1.470737   | 2.214831   | 2.072788   | 2.659911   | 4.092905  | 3.377952   | 4.747284   |
| gene-MA16_Dca001836 | 2.907329   | 3.010866   | 2.474296   | 4.144674   | 4.368387   | 3.900935   | 7.028458  | 7.279661   | 7.42808    |
| gene-MA16_Dca006431 | 240.007385 | 235.782608 | 220.927338 | 117.497765 | 120.097122 | 126.382408 | 63.923351 | 63.26606   | 66.860962  |
| gene-MA16_Dca008697 | 54.2463    | 56.281662  | 54.661289  | 22.16617   | 21.212637  | 19.402187  | 22.010618 | 21.089235  | 22.011656  |
| gene-MA16_Dca004147 | 13.279277  | 16.569391  | 16.216232  | 4.529667   | 5.429538   | 7.746277   | 3.948497  | 4.239231   | 4.523049   |
| gene-MA16_Dca000494 | 42.973335  | 42.315411  | 38.873619  | 28.57745   | 25.754595  | 24.672653  | 17.43454  | 20.256624  | 18.237589  |
