# Supplementary material for: RNA sequencing-based exploration of the effects of blue laser irradiation on mRNAs involved in functional metabolites of D. officinales
Source: PeerJ journal article supplement (doi:10.7717/peerj.12684), 2022-01-04
Supplement: Supplemental_information.zip [file Supplemental_information.zip]

**Table S16** The Ct mean of DEGs in *D. officinale* under different light treatments

| Light treatment | <i>HSP 70</i><br>Ct Mean | <i>CYP 86A 4S</i><br>Ct Mean | <i>ERF 13</i><br>Ct Mean | <i>CRY DASH</i><br>Ct Mean | <i>SPA 1</i><br>Ct Mean | <i>HY 5</i><br>Ct Mean | <i>CO 16</i><br>Ct Mean | <i>MYC 2</i><br>Ct Mean | <i>PIF 4</i><br>Ct Mean | <i>Actin</i><br>Ct Mean |
|-----------------|--------------------------|------------------------------|--------------------------|----------------------------|-------------------------|------------------------|-------------------------|-------------------------|-------------------------|-------------------------|
| White-1         | 24.825                   | 24.989                       | 25.979                   | 37.342                     | 29.298                  | 26.193                 | 24.640                  | 23.639                  | 24.930                  | 25.094                  |
| White-2         | 24.987                   | 25.163                       | 26.181                   | 37.833                     | 29.030                  | 25.819                 | 24.771                  | 23.460                  | 24.867                  | 25.046                  |
| White-3         | 24.789                   | 25.044                       | 25.759                   | 37.476                     | 28.882                  | 25.992                 | 24.672                  | 23.609                  | 24.988                  | 25.035                  |
| Blue-1          | 24.845                   | 24.833                       | 25.343                   | 35.963                     | 29.298                  | 26.193                 | 25.040                  | 24.859                  | 25.135                  | 25.094                  |
| Blue-2          | 24.949                   | 24.765                       | 25.328                   | 35.768                     | 29.030                  | 25.819                 | 25.171                  | 24.739                  | 25.157                  | 25.046                  |
| Blue-3          | 24.885                   | 24.707                       | 25.476                   | 35.955                     | 28.882                  | 25.992                 | 25.072                  | 24.918                  | 25.183                  | 25.067                  |
| Blue laser-1    | 23.575                   | 24.635                       | 24.349                   | 34.867                     | 28.639                  | 25.452                 | 25.405                  | 25.445                  | 24.373                  | 25.110                  |
| Blue laser-2    | 23.830                   | 24.851                       | 24.412                   | 34.641                     | 28.209                  | 25.739                 | 25.440                  | 25.385                  | 24.773                  | 25.397                  |
| Blue laser-3    | 23.867                   | 24.673                       | 24.221                   | 34.976                     | 28.365                  | 26.217                 | 25.410                  | 25.304                  | 24.749                  | 25.122                  |
