# Supplementary material for: RNA sequencing-based exploration of the effects of blue laser irradiation on mRNAs involved in functional metabolites of D. officinales
Source: PeerJ journal article supplement (doi:10.7717/peerj.12684), 2022-01-04
Supplement: Supplemental_information.zip [file Supplemental_information.zip]

**Table S17** The relative expression of DEGS in *D. officinale* under different light treatments

| Light treatment | <i>HSP 70</i>       |       | <i>CYP 86A 4S</i>   |       | <i>ERF 13</i>       |       | <i>CRY DASH</i>     |       | <i>SPA 1</i>        |       | <i>HY5</i>          |       | <i>CO 16</i>        |       | <i>MYC 2</i>        |       | <i>PIF 4</i>        |       |
|-----------------|---------------------|-------|---------------------|-------|---------------------|-------|---------------------|-------|---------------------|-------|---------------------|-------|---------------------|-------|---------------------|-------|---------------------|-------|
|                 | Relative expression | SD    |
| White           | 1.000               | 0.106 | 1.000               | 0.089 | 1.000               | 0.211 | 1.000               | 0.254 | 1.000               | 0.211 | 1.000               | 0.187 | 1.000               | 0.068 | 1.000               | 0.096 | 1.000               | 0.061 |
| Blue            | 0.990               | 0.053 | 1.237               | 0.063 | 1.517               | 0.082 | 3.172               | 0.111 | 1.007               | 0.211 | 1.007               | 0.187 | 0.763               | 0.068 | 0.418               | 0.091 | 0.859               | 0.024 |
| Blue laser      | 2.397               | 0.159 | 1.411               | 0.115 | 3.475               | 0.097 | 7.331               | 0.171 | 1.762               | 0.218 | 1.275               | 0.387 | 0.673               | 0.019 | 0.317               | 0.070 | 1.364               | 0.224 |
